# Supplementary material for: Gene selection based on adaptive neighborhood-preserving multi-objective particle swarm optimization
Source: PeerJ journal article supplement (doi:10.7717/peerj-cs.2872), 2025-05-28
Supplement: Codedatasets.zip [file Leukaemia.xlsx]

## Sheet: Sheet1
Golubtemplate	ALL	ALL	ALL	ALL	ALL	ALL	ALL	ALL	ALL	ALL	ALL	ALL	ALL	ALL	ALL	ALL	ALL	ALL	ALL	ALL	AML	AML	AML	AML	AML	AML	AML	AML	AML	AML	AML	AML	AML	AML	ALL	ALL	ALL	ALL	ALL	ALL	ALL	ALL	ALL	ALL	ALL	ALL	ALL	ALL	ALL
AFFX-BioB-5_at	6.64386	6.64386	6.64386	6.64386	6.64386	6.64386	6.64386	6.64386	6.64386	6.64386	6.64386	6.64386	6.64386	6.64386	6.64386	6.64386	6.64386	6.64386	6.64386	6.64386	6.64386	6.64386	6.64386	6.64386	6.64386	6.64386	6.64386	6.64386	6.64386	6.64386	6.64386	6.64386	6.64386	6.64386	6.64386	6.64386	6.64386	6.64386	6.64386	6.64386	6.64386	6.64386	6.64386	6.64386	6.64386	6.64386	6.64386	6.64386	6.64386
AFFX-BioB-M_at	6.64386	6.64386	6.64386	6.64386	6.64386	6.64386	6.64386	6.64386	6.64386	6.64386	6.64386	6.64386	6.64386	6.64386	6.64386	6.64386	6.64386	6.64386	6.64386	6.64386	6.64386	6.64386	6.64386	6.64386	6.64386	6.64386	6.64386	6.64386	6.64386	6.64386	6.64386	6.64386	6.64386	6.64386	6.64386	6.64386	6.64386	6.64386	6.64386	6.64386	6.64386	6.64386	6.64386	6.64386	6.64386	6.64386	6.64386	6.64386	6.64386
AFFX-BioB-3_at	6.64386	8.03342	6.64386	6.64386	6.64386	6.64386	6.64386	6.64386	7.40939	8.2854	6.64386	6.64386	6.64386	6.64386	6.64386	6.64386	6.64386	6.64386	6.64386	6.64386	6.64386	6.64386	6.64386	7.72792	6.67243	6.64386	6.64386	6.64386	6.64386	6.64386	6.64386	6.64386	6.64386	6.64386	6.64386	6.64386	6.64386	8.04985	6.64386	7.74819	7.89482	6.64386	6.72792	6.64386	6.64386	6.64386	6.64386	6.64386	6.64386
AFFX-BioC-5_at	8.35755	8.20457	8.10852	7.50779	8.05528	6.64386	7.14975	7.97728	7.44294	7.14975	7.46761	7.01123	7.18982	7.7211	7.49185	6.64386	7.88874	7.24793	8.07682	7.42626	6.64386	8.27146	7.40939	8.29462	8.31741	7.47573	8.40939	6.64386	8.62936	7.13955	6.64386	7.18982	8.75154	6.64386	6.64386	8.14466	8.27146	6.64386	7.39232	6.64386	6.64386	6.64386	8.06609	7.77479	6.64386	6.64386	7.43463	7.92481	7.21917
AFFX-BioC-3_at	6.64386	6.64386	6.64386	6.64386	6.64386	6.64386	6.64386	6.64386	6.64386	6.83289	6.64386	6.64386	6.64386	6.64386	6.64386	6.64386	6.64386	6.64386	6.64386	6.64386	6.64386	6.64386	6.64386	6.64386	6.64386	6.64386	6.64386	6.64386	6.64386	6.64386	6.64386	6.64386	6.64386	6.64386	6.64386	6.64386	6.64386	6.64386	6.64386	6.64386	6.64386	6.64386	6.64386	6.64386	6.64386	6.64386	6.64386	6.64386	6.64386
AFFX-BioDn-5_at	6.64386	6.64386	6.64386	6.64386	6.64386	6.64386	6.64386	6.64386	6.64386	6.64386	6.64386	6.64386	6.64386	6.64386	6.64386	6.64386	6.64386	6.64386	6.64386	6.64386	6.64386	6.64386	6.64386	6.64386	6.64386	6.64386	6.64386	6.64386	6.64386	6.64386	6.64386	6.64386	6.64386	6.64386	6.64386	6.64386	6.64386	6.64386	6.64386	6.64386	6.64386	6.64386	6.64386	6.64386	6.64386	6.64386	6.64386	6.64386	6.64386
AFFX-BioDn-3_at	6.64386	8.51964	6.64386	6.64386	6.64386	9.46964	6.64386	6.64386	6.64386	6.64386	6.64386	6.64386	6.64386	6.64386	7.13955	6.64386	6.64386	8.49586	7.42626	8.48382	8.67596	6.64386	6.64386	6.64386	6.64386	6.64386	6.64386	7.91886	7.88264	6.64386	6.64386	6.64386	6.64386	6.64386	7.63662	6.64386	6.64386	7.30378	6.64386	6.64386	7.03342	6.64386	6.64386	8.35755	6.64386	6.64386	6.64386	6.64386	6.64386
AFFX-CreX-5_at	6.64386	6.64386	6.64386	6.64386	6.64386	6.64386	6.64386	6.64386	6.64386	6.64386	6.64386	6.64386	6.64386	6.64386	6.64386	6.64386	6.64386	6.64386	6.64386	6.64386	6.64386	6.64386	6.64386	6.64386	6.64386	6.64386	6.64386	6.64386	6.64386	6.64386	6.64386	6.64386	6.64386	6.64386	6.64386	6.64386	6.64386	6.64386	6.64386	6.64386	6.64386	6.64386	6.64386	6.64386	6.64386	6.64386	6.64386	6.64386	6.64386
AFFX-CreX-3_at	7.09803	7.59991	6.64386	6.64386	6.64386	6.64386	6.64386	6.64386	6.64386	6.64386	6.64386	7.08746	6.64386	6.64386	6.64386	6.64386	6.64386	6.64386	7.53138	6.64386	6.64386	7.88264	6.64386	7.46761	6.64386	6.80735	6.64386	6.64386	6.64386	6.64386	6.64386	7.41785	7.87652	7.37504	7.97728	6.65821	7.6865	6.64386	6.64386	6.64386	6.97728	6.64386	6.64386	7.46761	6.64386	6.64386	6.64386	6.64386	6.64386
AFFX-BioB-5_st	6.64386	7.33985	8.96578	6.64386	7.31288	6.64386	6.64386	6.64386	6.64386	6.64386	6.64386	8.32193	7.21917	8.41363	9.77808	6.64386	7.70044	6.70044	7.29462	7.19967	8.13443	6.64386	8.26209	6.64386	6.64386	6.64386	7.98299	7.48382	7.66534	6.64386	6.64386	6.64386	7.29462	6.64386	7.6865	6.64386	6.64386	6.64386	7.97728	7.59246	6.64386	6.64386	8.98299	7.5157	8.45121	6.64386	7.84549	6.82018	6.64386
AFFX-BioB-M_st	6.64386	7.69349	6.64386	6.64386	6.64386	6.64386	6.64386	7.50779	6.64386	6.64386	6.64386	6.64386	6.64386	6.64386	6.64386	6.64386	6.64386	6.64386	6.64386	6.64386	6.64386	6.64386	6.64386	6.64386	6.64386	6.64386	6.64386	6.64386	6.64386	6.64386	6.64386	6.64386	6.64386	6.64386	6.64386	6.64386	6.64386	8.50383	7.27612	8.3443	6.64386	8.49586	8.14975	6.64386	7.67243	7.70044	6.64386	7.55459	7.67948
AFFX-BioB-3_st	6.64386	6.64386	6.64386	6.64386	6.64386	6.64386	6.64386	6.64386	6.64386	6.64386	6.64386	6.64386	6.64386	6.64386	6.64386	6.64386	6.64386	6.64386	6.64386	6.64386	6.64386	6.64386	6.64386	6.64386	6.64386	6.64386	6.64386	6.64386	6.64386	6.64386	6.64386	6.64386	6.64386	6.64386	6.64386	6.64386	6.64386	6.64386	6.64386	6.64386	6.64386	6.64386	6.64386	6.64386	6.64386	6.64386	6.64386	6.64386	6.64386
AFFX-BioC-5_st	6.64386	6.64386	6.64386	6.64386	6.64386	6.64386	6.64386	6.64386	6.64386	6.64386	6.64386	6.64386	6.64386	6.64386	6.64386	6.64386	6.64386	6.64386	6.64386	6.64386	6.64386	6.64386	6.64386	6.64386	6.64386	6.64386	6.64386	6.64386	6.64386	6.64386	6.64386	6.64386	6.64386	6.64386	6.64386	6.64386	6.64386	6.64386	6.64386	6.64386	6.64386	6.64386	6.64386	6.64386	6.64386	6.64386	6.64386	6.64386	6.64386
AFFX-BioC-3_st	6.64386	7.45121	6.64386	6.64386	6.64386	6.64386	6.64386	6.64386	6.64386	6.64386	6.64386	6.64386	6.64386	6.64386	6.64386	6.64386	6.64386	6.64386	6.64386	6.64386	6.64386	6.64386	6.64386	6.64386	6.64386	6.64386	6.64386	6.64386	6.64386	6.64386	6.64386	6.64386	6.64386	6.64386	6.64386	6.64386	6.64386	6.64386	6.64386	6.64386	6.64386	6.64386	6.64386	6.64386	6.64386	6.64386	6.64386	6.64386	6.64386
AFFX-BioDn-5_st	8.19967	7.41785	6.64386	6.64386	6.64386	8.37069	6.64386	7.16993	6.64386	6.64386	6.64386	6.64386	7.97728	7.44294	6.64386	7.54689	6.64386	9.02514	6.64386	7.27612	7.71425	7.31288	7.67948	6.64386	6.64386	6.64386	7.45943	7.99435	7.30378	7.92481	6.64386	6.64386	7.43463	8.69349	6.64386	7.50779	7.70044	7.14975	6.64386	6.64386	6.76818	6.64386	8.18982	7.86419	6.64386	6.64386	6.64386	6.64386	6.64386
AFFX-BioDn-3_st	7.91289	6.64386	6.64386	6.87036	7.94837	8.24317	7.16993	6.64386	6.64386	6.64386	6.64386	6.71425	7.62936	7.33092	8.61102	7.26679	6.64386	8.09803	8.3966	7.60733	7.73471	8.24317	6.80735	8.29462	8.02791	7.97154	7.14975	6.64386	8.26209	6.64386	6.64386	8.35755	8.42626	8.37069	8.57365	7.35755	8.75489	8.08215	7.73471	7.79442	8.76487	8.13443	7.42626	8.27612	7.7879	6.64386	7.92481	7.45121	6.64386
AFFX-CreX-5_st	6.64386	6.64386	6.64386	6.64386	6.64386	6.64386	6.64386	6.64386	6.87036	6.64386	6.64386	6.64386	6.64386	6.64386	6.64386	6.64386	6.64386	6.64386	6.64386	6.64386	6.64386	6.64386	6.64386	6.64386	6.94251	6.64386	6.64386	6.64386	6.64386	6.64386	6.64386	6.64386	6.64386	6.64386	6.64386	6.64386	6.64386	6.64386	6.64386	6.64386	6.64386	6.64386	6.64386	6.64386	6.64386	6.64386	6.64386	6.64386	6.64386
AFFX-CreX-3_st	6.64386	6.64386	6.64386	6.64386	6.64386	6.64386	6.64386	6.64386	6.64386	6.64386	6.64386	6.64386	6.64386	6.64386	6.64386	6.64386	6.64386	6.64386	6.64386	6.64386	6.64386	6.64386	6.64386	6.64386	6.64386	6.64386	6.64386	6.64386	6.64386	6.64386	6.64386	6.64386	6.64386	6.64386	6.64386	6.64386	6.64386	6.64386	6.64386	6.64386	6.64386	6.64386	6.64386	6.64386	6.64386	6.64386	6.64386	6.64386	6.64386
hum_alu_at	13.9658	13.9658	13.9658	13.9658	13.4506	13.9658	13.9658	13.9658	13.9658	13.9658	13.9658	13.9658	13.9658	13.9658	13.9658	13.9658	13.9658	13.9658	13.9658	13.9658	13.9658	13.9658	13.9658	13.9658	13.9658	13.9658	13.9658	13.9658	13.9658	13.9658	13.9658	13.9375	13.9658	13.9658	13.8814	13.4302	13.9658	13.9443	13.9658	13.9658	13.9658	13.9658	13.8986	13.9658	13.9658	13.9658	13.9658	13.8494	13.5057
AFFX-DapX-5_at	6.64386	6.64386	6.64386	6.64386	6.64386	7.50779	6.64386	6.64386	6.64386	6.64386	6.64386	6.64386	6.64386	6.64386	6.71425	6.64386	6.64386	6.64386	6.64386	6.64386	6.64386	6.64386	6.64386	6.64386	6.64386	6.64386	6.64386	6.64386	6.64386	6.64386	6.64386	6.64386	6.64386	6.64386	6.64386	6.64386	7.5157	6.64386	6.64386	6.64386	6.64386	8.40088	6.64386	6.64386	6.64386	6.64386	6.64386	6.64386	6.64386
AFFX-DapX-M_at	8.7211	7.09803	6.64386	7.47573	7.55459	8.08746	6.64386	8.09803	6.64386	6.64386	6.64386	6.64386	6.64386	6.83289	7.91289	7.07682	6.64386	6.64386	6.64386	6.64386	6.64386	7.41785	8.20457	7.43463	7.34873	6.70044	6.64386	7.05528	7.21917	6.64386	6.64386	8.2384	7.87652	6.65821	8.28077	7.06609	8.56224	8.06609	6.88264	7.26679	6.64386	8.07146	7.55459	6.64386	6.84549	7.53916	6.64386	7.06609	7.43463
AFFX-DapX-3_at	6.64386	6.64386	6.64386	6.64386	6.64386	6.64386	6.64386	6.64386	6.64386	6.64386	6.64386	6.64386	6.64386	6.64386	6.64386	6.64386	6.64386	6.64386	6.64386	6.64386	6.64386	6.64386	6.64386	6.64386	6.64386	6.64386	6.64386	6.64386	6.64386	6.64386	6.64386	6.64386	6.64386	6.64386	6.64386	6.64386	6.64386	6.64386	6.64386	6.64386	6.64386	6.64386	6.64386	6.64386	6.64386	6.64386	6.64386	6.64386	6.64386
AFFX-LysX-5_at	6.64386	6.64386	6.64386	6.64386	6.64386	6.64386	6.64386	6.64386	6.64386	6.80735	6.64386	6.64386	6.64386	6.64386	6.64386	6.64386	6.64386	6.64386	6.64386	6.64386	6.64386	6.64386	6.64386	6.64386	6.64386	6.64386	6.64386	6.64386	6.64386	6.64386	6.64386	6.64386	6.64386	6.72792	6.64386	6.64386	6.64386	6.64386	6.64386	6.64386	6.64386	6.64386	6.64386	6.64386	6.64386	6.64386	6.64386	6.64386	6.64386
AFFX-LysX-M_at	6.64386	6.64386	6.64386	6.64386	6.64386	6.64386	6.64386	6.64386	6.64386	6.64386	6.64386	6.64386	6.64386	6.64386	6.64386	6.64386	6.64386	6.64386	6.64386	6.64386	6.64386	6.64386	6.64386	6.64386	6.64386	6.64386	6.64386	6.64386	6.64386	6.64386	6.64386	6.64386	6.64386	6.64386	6.64386	6.64386	6.64386	6.64386	6.64386	6.64386	6.64386	6.64386	6.64386	6.64386	6.64386	6.64386	6.64386	6.64386	6.64386
AFFX-LysX-3_at	6.64386	8.22882	6.64386	6.64386	7.22882	6.64386	6.64386	6.84549	6.64386	6.64386	6.64386	6.64386	6.64386	6.82018	7.41785	6.94251	6.64386	6.64386	6.64386	6.64386	6.64386	8.09276	7.46761	7.31288	7.04439	6.64386	6.64386	6.64386	6.64386	8.64746	6.64386	6.64386	7.56224	7.29462	7.36632	6.64386	7.89482	7.94837	6.64386	6.64386	6.64386	8.04985	6.72792	6.64386	6.64386	6.64386	7.25739	6.64386	6.64386
AFFX-PheX-5_at	6.64386	6.64386	6.64386	6.64386	6.64386	6.64386	6.64386	6.64386	6.64386	6.64386	6.64386	6.64386	6.64386	6.64386	6.64386	6.64386	6.64386	6.64386	6.64386	6.64386	6.64386	6.64386	6.64386	6.64386	6.64386	6.64386	6.64386	6.64386	6.64386	6.64386	6.64386	6.64386	6.64386	6.64386	6.64386	6.64386	6.64386	6.64386	6.64386	6.64386	6.64386	6.64386	6.64386	6.64386	6.64386	6.64386	6.64386	6.64386	6.64386
AFFX-PheX-M_at	6.64386	6.64386	6.64386	6.64386	6.64386	6.64386	6.64386	6.64386	6.64386	6.64386	6.64386	6.64386	6.64386	6.64386	6.64386	6.64386	6.64386	6.64386	6.64386	6.64386	6.64386	6.64386	6.64386	6.64386	6.64386	6.64386	6.64386	6.64386	6.64386	6.64386	6.64386	6.64386	6.64386	6.64386	6.64386	6.64386	6.64386	6.64386	6.64386	6.64386	6.64386	6.64386	6.64386	6.64386	6.64386	6.64386	6.64386	6.64386	6.64386
AFFX-PheX-3_at	6.84549	6.64386	6.64386	6.64386	6.64386	6.76818	6.64386	6.64386	6.6865	8.75154	7.41785	6.64386	6.64386	6.64386	6.64386	6.64386	6.64386	6.64386	6.64386	6.64386	6.64386	6.64386	6.64386	6.64386	6.64386	6.64386	6.64386	6.64386	6.64386	6.64386	6.64386	6.64386	6.64386	6.64386	6.64386	6.64386	6.64386	6.64386	6.64386	6.64386	6.64386	6.64386	6.64386	6.64386	6.64386	6.64386	6.64386	6.64386	6.64386
AFFX-ThrX-5_at	6.64386	6.64386	6.64386	6.64386	6.64386	6.64386	6.64386	6.64386	6.64386	6.64386	6.64386	6.64386	6.64386	6.64386	6.64386	6.64386	6.64386	6.64386	6.64386	6.64386	6.64386	6.64386	6.64386	6.64386	6.64386	6.64386	6.64386	6.64386	6.64386	6.64386	6.64386	6.64386	6.64386	6.64386	6.64386	6.64386	6.64386	6.64386	6.64386	6.64386	6.64386	6.64386	7.15987	6.64386	6.64386	6.64386	6.64386	6.64386	6.64386
AFFX-ThrX-M_at	6.64386	6.64386	6.64386	6.67243	6.64386	6.64386	6.64386	6.64386	6.64386	6.64386	6.64386	6.64386	6.64386	6.64386	6.64386	6.64386	6.64386	6.64386	6.64386	6.64386	6.64386	6.64386	6.64386	6.64386	6.64386	6.64386	6.67243	6.64386	6.64386	6.64386	6.64386	6.64386	7.04439	6.64386	6.64386	6.64386	6.64386	6.64386	6.64386	6.64386	6.64386	6.64386	6.64386	6.64386	6.64386	6.64386	6.64386	6.64386	6.64386
AFFX-ThrX-3_at	6.64386	6.64386	6.64386	6.64386	6.64386	6.64386	6.64386	6.64386	6.64386	6.64386	6.64386	6.64386	6.64386	6.64386	6.64386	6.64386	6.64386	6.64386	6.64386	6.64386	6.64386	6.64386	6.64386	6.64386	6.64386	6.64386	6.64386	6.64386	6.64386	6.64386	6.64386	6.64386	6.64386	6.64386	6.64386	6.64386	6.64386	6.64386	6.64386	6.64386	6.64386	6.64386	6.64386	6.64386	6.64386	6.64386	6.64386	6.64386	6.64386
AFFX-TrpnX-5_at	6.82018	6.64386	6.64386	6.64386	6.64386	6.64386	6.64386	6.64386	6.64386	6.64386	6.64386	6.64386	6.64386	6.64386	6.64386	6.80735	6.64386	6.64386	6.64386	6.64386	6.64386	6.64386	6.64386	6.64386	6.64386	6.64386	7.29462	6.64386	6.64386	6.64386	6.64386	6.64386	6.64386	6.64386	6.64386	6.64386	6.64386	6.64386	6.64386	6.64386	6.64386	6.64386	6.64386	6.64386	6.64386	6.64386	6.64386	6.64386	6.64386
AFFX-TrpnX-M_at	6.64386	6.64386	6.64386	6.64386	6.64386	6.64386	6.64386	6.64386	6.64386	6.64386	6.64386	6.64386	6.64386	6.64386	6.64386	6.64386	6.64386	6.64386	6.64386	6.64386	6.64386	6.64386	6.64386	6.64386	6.64386	6.64386	6.64386	6.64386	6.64386	6.64386	6.64386	6.64386	6.64386	6.64386	6.64386	6.64386	6.64386	6.64386	6.64386	6.64386	6.64386	6.64386	6.64386	6.64386	6.64386	6.64386	6.64386	6.64386	6.64386
AFFX-TrpnX-3_at	6.64386	6.64386	6.64386	6.64386	6.64386	6.64386	6.64386	6.64386	6.64386	6.64386	6.64386	6.64386	6.64386	6.64386	6.64386	6.64386	6.64386	6.64386	6.64386	6.64386	6.64386	6.64386	6.64386	6.64386	6.64386	6.64386	6.64386	6.64386	6.64386	6.64386	6.64386	6.64386	6.64386	6.64386	6.64386	6.64386	6.64386	6.64386	6.64386	6.64386	6.64386	6.64386	6.64386	6.64386	6.64386	6.64386	6.64386	6.64386	6.64386
AFFX-HUMISGF3A/M97935_5_at	6.64386	6.64386	6.64386	6.64386	6.64386	6.64386	6.64386	6.64386	6.64386	6.64386	6.64386	6.64386	6.64386	6.64386	6.64386	6.64386	6.64386	6.64386	6.64386	6.64386	6.64386	6.64386	6.64386	6.64386	6.64386	6.64386	6.64386	6.64386	6.64386	6.64386	6.64386	6.64386	6.64386	6.64386	6.64386	6.64386	6.64386	6.64386	6.64386	6.64386	6.64386	6.64386	6.64386	6.64386	6.64386	6.64386	6.64386	6.64386	6.64386
AFFX-HUMISGF3A/M97935_MA_at	6.64386	6.64386	6.64386	6.64386	6.64386	6.64386	6.64386	6.64386	6.64386	6.64386	7.06609	6.64386	6.64386	6.64386	6.64386	9.24555	6.64386	6.64386	6.64386	6.64386	6.64386	6.64386	6.64386	7.02237	7.34873	6.64386	6.64386	6.64386	6.64386	6.64386	6.64386	6.64386	6.64386	6.64386	6.64386	6.64386	6.70044	6.64386	6.64386	6.64386	6.64386	6.64386	6.64386	6.64386	6.64386	6.64386	6.64386	6.64386	9.21432
AFFX-HUMISGF3A/M97935_MB_at	7.07682	6.64386	7.59991	7.66534	6.64386	6.64386	6.64386	6.64386	6.97728	6.64386	7.43463	7.18982	7.08746	6.64386	7.53138	9.18488	7.85175	6.64386	6.64386	6.64386	6.64386	8.44708	7.16993	7.37504	7.71425	6.64386	7.75489	6.64386	6.64386	6.64386	6.64386	7.5157	6.64386	6.82018	7.74819	6.85798	8.89482	7.27612	6.93074	7.45943	6.64386	8.00562	7.37504	7.27612	6.64386	6.64386	7.65821	7.53138	9.59991
AFFX-HUMISGF3A/M97935_3_at	8.0607	8.54303	9.05528	10.5177	9.3443	9.34873	7.36632	8.37069	8.32643	8.41363	8.30378	8.15987	9.11894	8.31288	9.43879	10.5622	9.90839	7.09803	9.35315	7.32193	7.98299	9.62388	8.27146	8.87036	9.56415	8.30378	9.16491	8.55842	8.46352	8.04439	8.25739	9.35975	8.89785	10.3587	9.63844	8.75822	10.5255	8.69697	8.91588	8.6865	8.5812	9.17991	9.55459	9.24317	8.05528	7.24793	9.60363	10.5411	10.7142
AFFX-HUMRGE/M10098_5_at	6.64386	6.64386	6.64386	6.64386	10.5048	13.3316	6.70044	8.26209	7.8009	6.64386	8.18488	13.0324	6.64386	6.64386	6.64386	6.64386	6.72792	6.64386	6.64386	6.64386	6.64386	10.4471	10.9024	6.64386	6.64386	6.64386	6.64386	6.64386	6.64386	6.70044	9.15228	11.8773	6.64386	6.64386	13.8275	9.26444	12.4689	12.2438	10.3264	12.0182	13.9658	11.9418	13.6668	6.64386	9.62753	13.0187	6.64386	9.83289	12.7313
AFFX-HUMRGE/M10098_M_at	6.64386	6.64386	6.64386	6.64386	9.30378	12.5575	6.64386	6.64386	6.64386	6.64386	6.64386	12.0519	6.64386	6.64386	6.64386	6.64386	6.64386	6.64386	6.64386	6.64386	6.64386	9.46761	7.7211	6.64386	6.64386	6.64386	6.64386	6.64386	6.64386	6.64386	8.90087	11.0795	6.64386	6.64386	13.2494	6.84549	11.676	11.163	11.4152	11.4215	13.4293	10.5962	12.8281	6.64386	6.93074	12.0375	6.64386	9.18735	12.762
AFFX-HUMRGE/M10098_3_at	6.64386	6.64386	6.64386	6.64386	8.49985	11.8941	6.64386	6.64386	7.98868	6.64386	8.35315	12.7383	6.64386	6.64386	6.64386	6.64386	6.64386	6.64386	6.64386	6.64386	6.64386	10.102	8.94251	6.64386	6.64386	6.64386	6.64386	6.64386	6.64386	6.90689	7.02237	10.0715	6.64386	6.64386	13.0582	10.568	11.8408	11.327	8.30378	11.2312	13.9658	10.3432	13.7668	6.64386	10.6008	12.3856	6.64386	10.9039	11.42
AFFX-HUMGAPDH/M33197_5_at	12.63	13.3929	13.9143	12.9218	13.8376	13.3011	13.3122	13.6084	13.9658	13.9658	13.9658	13.5237	12.6284	12.9033	13.9658	13.9658	13.4473	13.6204	13.0984	13.2674	13.9658	13.9658	13.9658	13.9658	13.4839	13.8991	13.5887	13.8803	13.7815	13.3226	12.7071	13.5453	13.0353	12.7488	13.88	13.9658	13.9658	13.865	13.8389	13.9658	13.5025	12.9986	13.9658	13.9658	13.9658	13.9658	13.4337	13.9658	13.9658
AFFX-HUMGAPDH/M33197_M_at	12.344	13.3173	13.8083	13.2261	13.3819	13.3059	13.9658	13.9658	13.9658	13.8532	13.9658	13.6674	12.5277	12.9995	13.9294	13.7611	13.7339	13.8165	12.9578	13.5926	13.9377	13.8003	13.9658	13.7739	13.9381	13.9658	13.8697	13.9658	13.8498	13.8696	13.2311	13.5153	12.4009	13.2464	13.4416	13.7279	13.9658	13.4817	13.8756	13.9658	13.5657	12.0276	13.9243	13.9658	13.9658	13.9658	13.3759	13.5113	13.7844
AFFX-HUMGAPDH/M33197_3_at	13.1429	13.9658	13.9658	13.9658	13.9658	13.9658	13.9658	13.9658	13.9658	13.9658	13.9658	13.9658	12.8673	13.5551	13.9658	13.9658	13.8603	13.9658	13.5599	13.9658	13.9658	13.9658	13.9658	13.9658	13.9658	13.9658	13.9658	13.9658	13.9658	13.9658	13.9658	13.9658	13.9658	13.9658	13.9658	13.9658	13.9658	13.9658	13.9658	13.9658	13.9658	13.3775	13.9658	13.9658	13.9658	13.9658	13.5384	13.9658	13.9658
AFFX-HSAC07/X00351_5_at	13.9658	13.2669	13.9072	12.7436	13.5063	13.9658	13.2735	13.7001	13.9658	13.3935	13.8653	13.8845	13.9658	13.2975	13.6925	13.9658	13.9658	13.9658	12.9874	13.5722	11.6839	13.9658	13.6124	13.9658	13.9658	13.8746	13.9658	13.9658	13.9658	12.997	13.326	13.9658	13.2783	13.4642	13.9658	13.9658	13.9658	13.9449	13.9658	13.9658	13.7288	13.9658	13.9658	13.9658	13.9658	13.5098	13.8324	13.9658	13.9658
AFFX-HSAC07/X00351_M_at	13.9658	13.696	13.9658	13.6109	13.8473	13.9658	13.9658	13.9658	13.9658	13.9125	13.9658	13.9658	13.9658	13.9642	13.9658	13.9658	13.9658	13.9658	13.6929	13.7608	12.6364	13.9658	13.8743	13.9658	13.9658	13.9658	13.9658	13.9658	13.9658	13.9658	13.9289	13.9658	13.5126	13.9658	13.9658	13.9658	13.9658	13.9658	13.9658	13.9658	13.8684	13.9658	13.9658	13.9658	13.9658	13.9658	13.9658	13.9658	13.9658
AFFX-HSAC07/X00351_3_at	13.9658	13.9658	13.9658	13.9658	13.9015	13.9658	13.9658	13.8284	13.9658	13.9658	13.8292	13.9658	13.9658	13.9658	13.9658	13.9658	13.9658	13.9658	13.9095	13.4534	13.9658	13.845	13.4826	13.7789	13.9658	13.9658	13.9658	13.9658	13.9658	13.9658	13.8461	13.9658	13.9658	13.9658	13.9453	13.9658	13.9658	13.7982	13.9658	13.9658	13.9658	13.9658	13.9378	13.9658	13.9658	13.9658	13.9658	13.9193	13.8753
AFFX-HUMTFRR/M11507_5_at	7.21917	7.76818	8.9571	7.98868	7.76155	8.5157	7.31288	9.40301	6.88264	7.12928	6.64386	7.26679	7.48382	7.85175	7.92481	7.62205	8.0607	7.24793	8.25739	6.70044	7.11894	8.69349	8.87652	8.50779	7.48382	7.11894	7.81378	7.71425	8.29462	7.74819	6.64386	8.2384	8.73132	8.41785	8.04439	9.00282	9.2503	7.5157	8.18488	7.93664	7.41785	8.92778	8.53528	6.64386	8.04439	7.88874	7.52356	7.31288	7.43463
AFFX-HUMTFRR/M11507_M_at	6.64386	6.64386	8.64024	6.64386	6.64386	6.64386	6.64386	8.8857	6.64386	6.64386	6.64386	6.64386	6.64386	6.64386	6.64386	6.64386	6.64386	6.64386	6.64386	6.64386	6.64386	8.9542	8.38802	7.33985	6.64386	6.64386	6.64386	6.64386	6.64386	6.64386	6.89482	6.64386	6.64386	6.64386	6.64386	7.25739	6.64386	6.64386	6.64386	6.64386	6.64386	6.64386	6.64386	6.64386	6.64386	6.64386	6.64386	6.64386	6.64386
AFFX-HUMTFRR/M11507_3_at	7.8392	6.64386	9.74651	7.75489	7.79442	7.10852	6.64386	9.63481	6.64386	6.64386	7.27612	7.01123	8.25267	7.76818	7.18982	7.86419	8.7879	8.03342	7.98868	6.64386	6.64386	9.9263	9.59246	9.47978	7.75489	6.64386	8.93958	7.61471	8.25267	7.24793	7.43463	7.74147	7.89482	6.64386	8.21917	8.15482	7.54689	8.02237	8.16491	7.79442	7.13955	6.84549	8.33539	8.32193	7.70736	7.60733	7.36632	8.70044	8.14466
AFFX-M27830_5_at	12.6479	6.64386	7.69349	7.40939	10.5421	13.623	8.13443	9.18982	13.9658	13.8932	13.9658	13.9658	8.31741	8.43463	8.71768	7.79442	7.64386	6.70044	8.47168	7.96	8.10852	11.0224	10.207	6.84549	6.64386	6.64386	6.64386	6.64386	6.64386	7.14975	8.44708	10.0084	7.18982	7.65105	12.7207	11.1131	11.6991	11.5784	10.1421	11.9315	12.922	12.0624	12.5779	6.64386	10.5803	12.0495	6.64386	9.29462	11.4372
AFFX-M27830_M_at	13.9658	10.9866	11.3343	9.73302	11.5348	13.7397	9.57932	10.4147	13.2625	13.582	13.906	13.9658	10.7432	10.3587	10.66	10.268	10.9144	8.8009	10.8273	10.403	11.1472	11.8933	11.1059	9.73302	9.62571	9.85953	9.93958	8.93664	8.80735	10.6092	10.8376	11.4517	8.69349	11.6055	12.6793	11.9009	11.7095	11.2538	10.0444	12.1453	11.3061	12.1491	11.9352	9.05528	11.7887	12.688	9.8009	10.7928	11.809
AFFX-M27830_3_at	8.83289	8.42626	9.68299	8.33539	9.91139	9.67243	6.64386	9.41996	7.7211	7.56986	6.64386	7.54689	9.41996	9.55267	6.64386	9.92184	6.67243	8.75154	9.49785	8.68299	6.64386	9.93664	6.64386	6.64386	9.50779	9.28309	10.268	8.45943	9.18735	6.64386	7.2854	10.1163	9.49386	9.08746	10.1849	9.35535	9.85643	9.04166	8.80735	8.11374	9.5216	10.0593	9.52748	9.59619	9.59432	8.49185	8.48382	9.76818	8.50383
AFFX-HSAC07/X00351_3_st	9.28077	9.23122	10.0238	9.91886	10.2503	11.988	10.7039	10.1319	10.6092	9.09276	9.89482	11.196	9.48583	9.84862	10.1687	9.29921	9.94398	9.69	9.72622	10.9622	11.7727	9.7211	9.44501	9.54689	10.021	9.53138	10.2167	10.6193	9.92184	9.90989	10.1586	12.2131	10.1699	10.4949	11.5421	11.638	11.5967	10.7574	9.50779	10.683	11.9744	10.0728	12.9551	9.42206	10.6891	10.5915	9.82972	11.9469	10.9866
AFFX-HUMGAPDH/M33197_5_st	6.64386	6.64386	7.01123	6.64386	6.64386	6.64386	7.05528	7.97728	6.64386	6.64386	7.12928	6.97728	6.64386	6.64386	6.64386	7.45943	6.64386	6.64386	6.64386	6.64386	7.34873	6.64386	7.39232	9.0607	6.64386	6.64386	6.64386	7.63662	6.64386	6.64386	6.64386	7.91289	6.64386	6.64386	7.90689	6.64386	7.97728	6.64386	6.64386	6.64386	6.64386	6.64386	7.87652	6.64386	7.67243	7.21917	6.64386	6.64386	6.64386
AFFX-HUMGAPDH/M33197_M_st	8.0607	8.00562	6.64386	8.06609	6.64386	6.64386	7.78136	6.9542	8.26679	7.03342	6.64386	8.38802	7.04439	7.30378	6.64386	7.98868	7.74819	6.89482	6.64386	6.79442	8.50779	8.0607	8.66534	8.87652	6.97728	7.33092	6.64386	6.64386	6.64386	6.64386	6.64386	8.56605	6.64386	6.64386	7.04439	8.23362	9.03342	6.64386	6.64386	8.2384	7.41785	6.64386	9.35535	6.64386	8.73471	7.48382	6.64386	8.57743	7.40939
AFFX-HUMGAPDH/M33197_3_st	6.64386	8.78136	7.30378	6.64386	8.03342	8.19967	7.5157	7.8009	7.49185	6.64386	6.76818	8.65105	7.19967	7.87036	6.64386	6.64386	6.64386	7.42626	7.40088	7.71425	9.93811	9.49386	8.81378	8.3837	6.64386	8.19967	6.64386	7.63662	7.30378	7.05528	6.64386	9.38802	8.63662	6.64386	9.09276	9.04985	9.83131	8.35315	6.90689	9.15987	8.86109	8.27612	9.53333	7.64386	8.8009	9.39017	7.08746	8.61839	8.77149
AFFX-HSAC07/X00351_5_st	6.64386	6.64386	6.64386	6.64386	6.64386	6.64386	6.64386	6.64386	6.64386	6.64386	6.64386	6.64386	6.64386	6.64386	6.64386	6.64386	6.64386	6.64386	6.64386	6.64386	6.64386	6.64386	6.64386	8.43879	6.64386	6.64386	6.64386	6.64386	6.64386	6.64386	6.64386	6.64386	6.64386	6.64386	6.64386	7.53138	7.12928	6.64386	6.64386	8.57743	6.64386	6.64386	7.03342	6.64386	6.64386	6.87036	6.64386	6.64386	6.64386
AFFX-HSAC07/X00351_M_st	7.59246	9.36632	8.76487	6.64386	7.05528	10.0526	7.75489	9.01123	7.37504	6.64386	7.14975	8.61471	7.27612	7.45121	6.67243	6.64386	7.5157	7.72792	8.91886	8.02791	6.74147	8.72451	7.7211	8.99435	7.09803	7.8392	8.40939	7.88264	8.62936	7.05528	6.64386	9.42417	9.04439	8.14975	8.39232	8.70736	9.57175	8.99718	6.64386	9.46148	8.80735	10.0674	9.18982	7.52356	7.96	8.18488	7.33985	9.19476	7.88874
A28102_at	7.91289	8.74819	6.64386	6.64386	8.02237	6.64386	8.02791	9.11634	8.26679	8.88264	6.75489	7.96	6.88264	6.64386	7.6865	7.41785	7.93664	8.0607	8.57365	8.17493	7.10852	6.64386	8.74819	8.88264	6.90689	7.34873	10.1111	8.65105	7.17991	8.30378	7.83289	8.62571	8.28077	8.54303	7.2384	8.03892	6.64386	8.91886	6.88264	8.07682	8.8392	9.76818	6.64386	7.59991	7.15987	8.48784	6.64386	7.75489	6.64386
AB000114_at	6.64386	6.64386	6.64386	6.64386	6.64386	6.64386	6.64386	7.39232	6.64386	7.96	6.64386	6.64386	6.64386	6.64386	6.64386	6.64386	6.64386	6.64386	6.64386	6.9542	6.64386	6.64386	6.64386	6.64386	6.64386	6.64386	7.53138	6.64386	6.64386	6.64386	6.64386	6.64386	6.64386	6.64386	6.64386	6.64386	6.64386	6.64386	6.64386	6.64386	6.64386	6.64386	6.64386	6.64386	6.64386	6.64386	6.64386	6.64386	6.64386
AB000115_at	7.97154	7.03342	7.10852	10.1636	7	8.35315	6.94251	7.21917	7.77479	9.19229	6.98868	7.74819	7.44294	7.26679	6.65821	10.4727	8.96867	6.64386	7.03342	7.3837	6.64386	6.64386	6.9542	7.5157	7.97728	7.03342	9.74651	7.57743	6.64386	6.71425	6.72792	8.3837	7.87652	8.55842	8.13443	7.96578	8.48382	6.88264	7.62205	6.64386	7.39232	8.20945	7.62936	6.82018	7.35755	7.53138	6.79442	7.36632	7.44294
AB000220_at	6.64386	6.64386	6.64386	6.64386	6.64386	6.64386	6.64386	6.64386	7.3837	7.65821	6.64386	6.64386	6.64386	6.64386	6.64386	6.64386	6.64386	6.64386	7.35755	6.64386	6.64386	6.64386	6.64386	6.64386	6.64386	6.64386	6.64386	6.64386	6.64386	6.70044	6.82018	6.64386	6.64386	6.64386	6.64386	6.64386	6.64386	6.64386	6.64386	6.64386	6.64386	6.64386	6.64386	6.64386	6.64386	6.64386	6.64386	6.64386	6.64386
AB000409_at	6.64386	7.49985	6.64386	6.64386	6.64386	6.64386	6.96578	7.06609	6.91886	7.33092	6.64386	6.64386	6.64386	6.64386	6.65821	6.96578	6.64386	6.64386	6.64386	6.64386	6.64386	6.64386	6.64386	6.64386	8.41363	6.64386	6.64386	6.64386	6.64386	6.64386	6.64386	8.7039	9.72281	8.65464	6.64386	6.64386	7.14975	6.64386	7.88874	6.64386	6.64386	6.64386	7.20945	6.64386	6.64386	7.02237	6.64386	6.64386	7.18982
AB000449_at	7.21917	6.64386	8.14466	8.15482	9.70217	7.56986	8.46352	8.53916	7.96	8.10329	6.84549	6.64386	6.64386	6.64386	8.43879	8.57743	6.84549	6.64386	8.00562	7.60733	6.64386	6.64386	6.64386	6.64386	7.49185	6.64386	6.64386	7.65105	6.64386	6.64386	7.13955	8.01681	7.39232	6.64386	6.64386	7.40088	8.48784	8.09803	8.28077	7.85798	7.03342	6.64386	8.29002	7.67243	8.26209	7.30378	9.92333	8.29921	8.96
AB000450_at	8.10329	8.66534	6.82018	7.42626	8.60733	7.63662	8.01681	6.93074	7.70736	8.49185	6.64386	7.01123	6.98868	6.64386	7.55459	8.26679	7.48382	6.87036	7.59246	6.64386	6.64386	7.17991	7.76155	6.64386	7.71425	6.64386	6.64386	6.64386	7.08746	8.02791	7.36632	8.48784	9.01402	7.24793	7.53916	7.77479	7.88874	7.93664	7.53916	6.64386	7.63662	9.11894	8.01681	6.64386	6.64386	6.64386	7.78136	6.78136	7.69349
AB000460_at	11.3292	10.9388	10.0795	10.5962	11.1176	11.4853	11.3151	9.7879	10.1396	10.6475	9.61655	10.2866	10.3443	10.5897	10.8994	10.8242	10.5555	10.3805	10.9607	10.2668	9.47978	11.2854	10.6591	10.9498	10.8001	10.5324	10.927	10.5527	11.1774	10.4481	10.0084	11.375	11.8017	10.8486	10.6856	10.9965	10.9636	11.0553	10.6511	10.403	10.8009	11.5073	11.0478	10.4594	11.0478	10.4898	11.1396	10.7912	10.7895
AB000462_at	7.39232	6.64386	6.79442	7.90087	7.94251	6.67243	9.14466	7.45121	7.14975	7.62205	6.64386	6.64386	6.64386	6.64386	6.64386	8.07682	7.75489	6.64386	6.82018	6.64386	6.93074	8.83605	6.9542	6.75489	6.85798	6.64386	9.08746	6.64386	6.64386	6.64386	6.64386	8.31288	6.64386	6.64386	7.09803	7.55459	6.64386	6.64386	7.67243	6.64386	6.64386	6.64386	6.64386	6.64386	6.64386	8.25739	8.55842	7.02237	7.70736
AB000464_at	10.1687	9.99577	9.04985	9.18488	9.20945	9.55075	7.49985	8.82655	8.39232	8.5812	8.07682	8.53528	9.27612	9.78463	9.09803	8.44294	9.21675	8.43879	9.24555	7.49185	7.58496	10.0875	9.54689	9.67066	9.82972	8.90388	9.84235	9.36851	10.5708	9.39874	8.9629	9.96723	9.9263	9.53333	9.64926	9.56224	11.2958	10.5401	8.33092	9.55075	8.67596	10.0688	10.5459	7.94251	9.46352	9.29692	9.91289	9.37938	9.09803
AB000466_at	6.64386	6.64386	6.64386	6.64386	6.64386	6.64386	6.64386	6.64386	6.64386	6.64386	6.64386	6.64386	6.64386	6.64386	6.64386	6.64386	6.64386	6.64386	6.64386	6.64386	6.64386	6.64386	6.64386	6.64386	6.64386	6.64386	6.64386	6.64386	6.64386	6.64386	6.64386	6.64386	6.64386	6.64386	6.64386	6.64386	6.64386	6.64386	6.64386	6.64386	6.64386	6.64386	6.64386	6.64386	6.64386	6.64386	6.64386	6.64386	6.64386
AB000467_at	6.64386	6.64386	6.64386	6.64386	6.64386	6.64386	6.64386	6.64386	6.64386	6.64386	6.64386	6.64386	6.64386	6.64386	6.64386	6.64386	6.64386	6.64386	6.64386	6.64386	6.64386	6.64386	6.64386	6.64386	6.64386	6.64386	6.64386	6.64386	6.64386	6.64386	6.64386	6.64386	6.64386	6.64386	6.64386	6.64386	6.64386	6.64386	6.64386	6.64386	6.64386	6.64386	6.64386	6.64386	6.64386	6.64386	6.64386	6.64386	6.64386
AB000468_at	6.64386	6.64386	8.08746	9.58684	10.7863	6.64386	9.58308	7.94837	9.00843	8.01123	6.64386	6.64386	9.05257	9.87191	9.36194	9.41785	10.8218	8.29462	7.90087	8.38802	7.88264	11.2894	6.64386	8.55459	8.62205	7.58496	6.64386	8.20457	7.89482	8.0607	9.62753	9.16742	7.97728	8.37938	8.56224	7.96	8.49985	8.05528	9.11374	6.78136	8.2854	7.89482	9.80735	7.8392	11.2485	6.64386	9.87191	9.48985	10.332
AB000584_at	6.64386	6.64386	6.64386	6.64386	6.64386	6.64386	6.64386	6.71425	6.67243	6.64386	6.64386	6.64386	6.64386	6.64386	6.64386	6.64386	6.64386	6.64386	6.64386	6.64386	6.64386	6.64386	6.64386	6.64386	6.64386	6.64386	6.64386	6.64386	6.64386	6.64386	7.34873	6.64386	6.64386	6.64386	6.64386	6.64386	6.64386	6.64386	6.64386	6.64386	7.06609	6.64386	6.64386	6.64386	6.64386	6.64386	6.64386	6.64386	6.64386
AB000895_at	7.19967	6.64386	6.64386	6.64386	6.64386	6.64386	6.64386	6.64386	6.64386	6.64386	6.64386	6.64386	6.64386	6.64386	6.64386	8.37069	8.3443	6.64386	6.64386	6.64386	6.64386	6.64386	6.64386	6.64386	6.64386	6.64386	6.64386	6.64386	8.40939	6.64386	6.64386	6.64386	6.64386	6.64386	6.64386	6.64386	6.64386	6.64386	6.64386	6.64386	6.64386	6.64386	6.64386	6.64386	6.64386	6.64386	6.64386	6.64386	6.64386
AB000896_at	6.64386	6.83289	6.64386	6.64386	6.64386	6.64386	6.64386	6.64386	6.94251	7.20945	6.64386	6.64386	6.64386	6.64386	6.64386	6.64386	6.64386	6.64386	6.64386	6.64386	6.64386	6.64386	6.64386	6.64386	6.64386	6.64386	6.64386	6.64386	6.64386	6.64386	6.64386	6.87036	6.64386	6.64386	6.64386	6.64386	6.64386	6.64386	6.64386	6.64386	6.64386	6.64386	6.64386	6.64386	6.64386	6.64386	6.64386	6.64386	6.64386
AB000897_at	6.64386	6.64386	6.64386	6.64386	6.64386	6.64386	6.64386	6.64386	6.79442	6.64386	6.64386	6.64386	6.64386	6.64386	6.64386	6.64386	6.64386	6.64386	6.64386	6.64386	6.64386	6.64386	6.64386	6.64386	6.64386	6.64386	6.64386	6.64386	6.64386	6.64386	6.64386	6.64386	6.64386	6.64386	6.64386	6.64386	6.64386	6.64386	6.64386	6.64386	6.64386	6.64386	6.64386	6.64386	6.64386	6.64386	6.64386	6.64386	6.64386
AB000905_at	8.23362	6.64386	7.34873	6.64386	7.10852	7.53138	6.64386	7.50779	7.83289	7.11894	6.93074	7.05528	6.64386	7.03342	6.64386	7.47573	6.64386	6.64386	6.64386	6.76818	6.64386	7.06609	6.64386	6.64386	6.64386	6.64386	8.20945	6.93074	7.93074	6.64386	6.64386	6.64386	6.64386	6.64386	7.27612	7.03342	8.07682	6.84549	6.64386	6.64386	7.43463	6.91886	6.64386	6.64386	7	6.64386	6.82018	6.64386	6.64386
AB001106_at	6.79442	7.83289	8.02791	7.49185	9.75322	8.05528	8.01123	7.50779	8.25267	7.57743	6.91886	6.64386	8.59246	9.79279	8.36194	9.23362	8.89482	7.67243	7.40088	7.94251	8.30834	9.84706	7.92481	8.40088	7.71425	7.70044	6.64386	8	8.90989	8.00562	8.43045	8.53528	8.9542	7.33985	8.47168	8.75154	9.23601	7.99435	9.15228	7.08746	8.13955	8.20457	8.81378	8.64386	8.92778	7.82655	9.57932	7.99435	8.15987
AB001325_at	9.98868	9.02514	9.44087	9.7364	9.76818	10.8447	8.89178	9.81057	9.48985	9.60918	8.99152	8.80735	8.99435	9.57365	8.90388	9.38586	9.54689	9.35315	10.0112	9.35535	8.53916	10.2479	10.0821	10.224	9.38802	9.08215	10.4757	9.55842	10.5353	9.39874	9.24793	10.3805	10.6768	9.39017	10.1662	9.87805	10.9099	10.0741	8.96867	10.4242	10.4062	10.7814	10.8895	9.62936	9.97871	9.34651	9.86728	10.1033	8.48784
AB002314_at	6.64386	6.64386	6.64386	6.64386	6.64386	6.64386	7.17991	6.64386	6.6865	6.64386	6.64386	6.64386	6.93074	6.64386	6.94251	6.64386	6.64386	6.64386	6.64386	6.64386	6.64386	6.64386	6.64386	6.64386	6.64386	6.64386	6.64386	6.64386	7.17991	6.64386	6.64386	6.64386	6.64386	6.64386	6.64386	6.64386	6.64386	6.64386	6.64386	6.64386	6.64386	6.64386	6.64386	6.64386	6.64386	6.64386	6.64386	6.64386	6.64386
AB002315_at	7.56986	6.64386	8.28077	7.60733	8.15482	6.64386	6.64386	7.53138	7.94251	7.71425	6.64386	6.6865	7.42626	7.90087	8.29921	8.87036	7.17991	7.31288	7.2384	6.89482	7.72792	8.75154	8.70044	8.65821	8.19476	6.67243	6.64386	6.64386	6.64386	6.64386	7.49185	6.64386	6.64386	6.70044	7.30378	8.35755	8.23362	7.89482	7.49985	6.64386	6.64386	7.15987	8.60363	6.64386	8.47573	6.64386	7.8392	7.2854	7.17991
AB002318_at	10.268	8.99435	10.1176	9.64746	10.69	11.2021	8.67948	9.20701	9.18982	8.48784	9.47371	9.52552	9.74987	10.1712	10.2384	10.0888	9.00843	9.69349	9.75656	8.7879	8.29002	10.3083	9.67948	9.77808	9.76818	9.633	10.2889	8.33539	10.6411	9.89785	8.97154	10.2562	9.51373	8.8392	10.0821	10.2467	10.3231	10.3619	8.20945	9.71596	10.0238	10.2912	10.4252	9.91886	10.6138	8.94837	9.56415	9.95128	9.3015
AB002365_at	7.69349	9.10591	6.64386	6.64386	6.64386	7.13955	6.64386	6.64386	6.64386	6.64386	6.64386	6.64386	6.64386	6.64386	6.64386	6.64386	6.64386	6.64386	7.49185	6.64386	6.64386	6.64386	6.64386	7.2384	6.64386	6.64386	6.64386	6.84549	6.64386	6.64386	6.64386	6.64386	6.71425	6.64386	6.64386	6.64386	7	6.80735	6.64386	7.16993	6.64386	7.66534	6.64386	6.64386	6.64386	6.64386	6.64386	6.64386	6.64386
AB002366_at	6.64386	6.64386	6.64386	6.64386	6.64386	6.64386	6.64386	6.64386	6.64386	6.64386	6.64386	6.64386	6.64386	6.64386	6.64386	6.64386	6.64386	6.64386	6.64386	6.64386	6.64386	6.64386	6.64386	6.64386	6.64386	6.64386	6.64386	6.64386	6.64386	6.64386	6.64386	6.64386	6.91886	6.64386	6.96578	6.64386	6.64386	6.64386	6.64386	6.64386	6.64386	6.64386	6.64386	6.64386	6.64386	6.64386	6.64386	6.64386	6.64386
AB002380_at	6.64386	6.64386	7.21917	7.08746	6.64386	6.80735	6.64386	7.7879	7.35755	6.64386	6.64386	6.64386	6.64386	6.64386	6.64386	6.64386	6.64386	6.64386	6.64386	6.64386	6.64386	6.64386	6.64386	6.64386	6.76818	6.64386	6.64386	6.64386	7.04439	6.70044	6.75489	6.64386	6.64386	6.64386	6.64386	6.64386	6.64386	6.64386	6.64386	6.64386	6.64386	6.64386	6.64386	6.64386	6.64386	6.64386	6.64386	6.64386	6.64386
AB002382_at	9.58308	9.2384	7.45943	8.43463	9.18735	9.46148	8.65464	7.13955	6.64386	7.53138	8.52748	7.31288	7.15987	8.02791	8.33539	8.94837	6.84549	8.88874	9.18239	7.42626	7.97154	10.4615	8.32643	7.57743	8.91886	8.41363	9.14975	7.13955	8.90989	7.48382	8.10852	10.2082	9.70044	9.33985	9.11114	7.74819	8.84549	9	9.00562	9.00843	8.43879	10.0098	8.61471	8.22882	9.10329	8.3966	9.12928	8.83605	9.07414
AB002409_at	7.60733	6.71425	6.64386	6.67243	6.64386	6.64386	6.64386	6.64386	6.64386	6.64386	6.64386	6.64386	6.64386	6.64386	6.64386	6.64386	6.64386	6.64386	6.64386	7.53138	6.64386	6.64386	6.64386	6.64386	7.46761	7.3837	6.64386	7.60733	6.64386	6.64386	7.02237	7.96	7.36632	6.64386	7.24793	6.70044	6.64386	6.64386	6.64386	6.64386	6.64386	6.64386	6.64386	6.64386	6.64386	6.64386	6.64386	6.64386	7.72792
AB002559_at	10.2456	10.0768	10.0403	9.3966	9.46761	10.2992	10.0375	10.7707	10.3663	9.51175	9.68825	10.0661	9.59619	9.43045	10.128	9.75822	9.13955	9.90388	10.4273	10.4062	9.74315	10.8704	10.6375	10.952	11.3815	10.1396	11.8142	11.0721	10.6466	9.58684	9.80252	11.2952	11.5033	11.0681	9.56796	10.6935	10.1421	10.0526	9.68299	9.99435	10.0607	10.5068	10.102	10.1849	9.37069	9.55651	9.50779	9.84235	9.88111
AB003102_at	8.84862	9.06878	9.76155	8.75489	10.3026	9.55075	9.26444	9.09011	7.97728	8.77808	8.44708	7.36632	8.85175	9.30834	9.82018	9.57743	9.2738	8.64746	8.9629	8.07146	7.13955	10.6175	9.44501	9.39232	8.86728	8.67948	8.74483	8.16993	9.03892	8.68299	9.46761	9.3966	9.65284	9	9.10591	9.52943	9.78953	9.35315	9.56224	9.58684	8.86728	9.98726	9.71768	8.77808	10.4179	8.24793	9.783	9.45943	9.85331
AB003103_at	6.64386	7.54689	6.64386	6.64386	8.79766	6.64386	7.22882	6.64386	6.64386	6.64386	6.64386	6.64386	6.64386	6.64386	7.49985	6.64386	7.2384	6.64386	6.64386	6.64386	6.64386	7.85798	6.75489	6.64386	7.82655	6.64386	6.64386	6.64386	6.64386	6.64386	7.11894	6.6865	6.64386	6.64386	6.64386	6.64386	7.13955	6.64386	7.31288	6.64386	7.11894	7.02237	6.64386	6.64386	7.56224	6.64386	7.86419	7.32193	6.84549
AB003177_at	8.28077	10.0182	9.79279	8.41785	9.99294	9.55075	9.54882	9.57175	8.88264	9.72962	8.29002	8.49586	9.24793	9.50184	10.2046	10.196	8.85487	8.49586	9.23362	7.76818	8.9571	9.66356	8.65821	9.18982	9.92778	8.53528	8.31288	7.86419	9.70044	8.80735	9.51964	9.62571	10.0112	9.2384	9.19967	9.60918	10.0279	9.34873	9.96434	9.16993	9.57743	9.26209	10.3674	8.94544	10.1898	7.61471	9.31515	9.50779	9.2503
AB003698_at	6.84549	7.45121	7.56224	7.31288	9.46148	8.12412	8.21917	7.63662	7.85175	7.20945	6.64386	6.64386	6.64386	6.64386	8.06609	7.24793	6.64386	7.26679	8.29462	7.67948	6.64386	7.40088	6.64386	6.64386	8.224	6.96578	6.83289	7.05528	6.64386	6.79442	7.11894	7.75489	7.60733	6.64386	7.01123	7.50779	8.72451	7.19967	7.92481	7.08746	6.78136	6.64386	8.55459	7.6865	8.34873	6.64386	8.87344	8.54303	7.77479
AB004884_at	8.94837	9.19229	9.75489	9.55842	10.6926	10.0056	9.29692	9.15228	8.47168	9.86109	9.21917	9.26913	9.15735	9.06878	9.82496	10.1472	9.83763	8.62936	9.00843	8.59991	8.15987	10.0126	9.67596	9.33762	8.62571	8.42206	8.81698	8.55075	9.54882	8.50383	8.80413	10.3761	10.4491	9.21675	10.1396	9.88264	9.99294	9.82018	10.0182	9.04439	9.90087	9.5812	10.0471	9.82177	10.1085	8.71081	10.4136	9.92481	9.73302
AB006190_at	8.8857	9.74651	9.03617	9.08215	9.73471	9.88874	8.7211	9.59059	8.44294	8.93369	8.62205	8.49586	9.20945	9.19476	9.01402	9.2854	9.20457	8.88874	9.50779	8.71081	8.80413	9.97154	9.25503	9.14211	9.49386	9.10329	9.54689	8.92481	9.99435	8.50383	8.32643	9.783	10.6055	9.47776	9.84392	9.56796	9.99294	9.26209	9.43254	8.67948	9.36194	10.0875	9.46557	8.73809	9.24079	8.98014	9.45327	9.3015	8.58871
AC000061_cds2_at	6.64386	9.74819	7.76155	7.87652	7.21917	9.68475	7.59991	7.94837	7.82018	7.75489	7.62205	8.05528	6.80735	9.04985	6.96578	8.51175	6.64386	8.5157	7.66534	7.82018	6.64386	8.30378	7.59246	8.33539	7.10852	8.17991	7.91289	8.43045	9.32418	6.64386	7.56224	8.42626	9.04439	6.70044	8.64024	7.77479	9.3443	9.57175	8.03892	8.02791	9.93958	7.93074	7.93074	8.03892	7.89482	8.43879	6.64386	8.20945	7.64386
AC000061_cds3_at	6.64386	6.64386	6.64386	6.64386	6.64386	6.64386	6.64386	6.64386	6.64386	6.64386	6.64386	6.64386	6.64386	6.64386	6.64386	6.64386	6.64386	6.64386	6.64386	6.64386	6.64386	6.64386	6.64386	6.64386	6.64386	6.64386	6.64386	6.64386	6.64386	6.64386	6.64386	6.64386	6.64386	6.64386	6.64386	6.64386	6.64386	6.64386	6.64386	6.64386	6.64386	6.64386	6.64386	6.64386	6.64386	6.64386	6.64386	6.64386	6.64386
AC000062_at	6.64386	6.64386	6.64386	6.64386	6.64386	6.64386	6.64386	6.64386	6.64386	6.64386	6.64386	6.64386	6.64386	6.64386	6.64386	6.64386	6.64386	6.64386	6.64386	6.64386	6.64386	6.64386	6.64386	6.64386	6.64386	6.64386	6.64386	6.64386	6.64386	6.64386	6.64386	6.64386	6.64386	6.64386	6.64386	6.64386	6.64386	6.64386	6.64386	6.64386	6.64386	6.64386	6.64386	6.64386	6.64386	6.64386	6.64386	6.64386	6.64386
AC000064_cds1_at	7.82018	9.30378	7.98299	7.96578	8.65105	9.04166	7.09803	8.15987	7.17991	6.98868	7.52356	6.96578	7.50779	7.21917	8.83289	8.47168	8.32193	8.08746	7.62936	7.5157	7.13955	9.41363	9.18239	9.18735	9.09803	8.35755	8.5812	8.41785	9.57932	8.53138	7.88264	8.80735	10.0607	8.38802	8.08215	9.21675	8.83605	8.69349	8.633	7.17991	8.9629	9.04985	8.26209	8.25267	7.63662	8.46352	8.20945	9.23601	8.59246
AC000064_cds2_at	6.79442	8.15987	6.64386	6.64386	7.76818	7.67948	7.3837	7.93664	6.64386	7.33092	6.64386	6.64386	7	6.98868	7.08746	7.12928	7.24793	7.67243	6.64386	8.224	6.85798	7.5157	7.92481	7.81378	6.64386	6.64386	6.75489	8	6.64386	7.88874	6.64386	7.14975	7.98868	8.05528	6.64386	7.14975	7.67948	7.14975	6.64386	7.07682	7.45943	8.14466	7.54689	6.64386	7.21917	6.64386	7.37504	7.08746	7.36632
AC000066_at	6.64386	6.64386	6.64386	6.64386	6.64386	6.64386	6.64386	6.64386	6.64386	6.64386	6.64386	6.64386	6.64386	6.64386	6.64386	6.64386	6.64386	6.64386	6.64386	6.64386	6.64386	6.64386	6.64386	6.64386	6.64386	6.64386	6.64386	6.64386	6.64386	6.64386	6.64386	6.64386	6.64386	6.64386	6.64386	6.64386	6.64386	6.64386	6.64386	6.64386	6.64386	6.64386	6.64386	6.64386	6.64386	6.64386	6.64386	6.64386	6.64386
AC000099_at	8.02237	8.03342	7.34873	6.64386	7.53916	8.37938	7.30378	6.64386	6.71425	6.78136	6.64386	6.96578	6.78136	6.64386	7.10852	7.22882	6.64386	6.9542	6.64386	6.72792	7.33985	7.94837	7.7211	6.64386	8.17493	6.64386	7.43463	6.64386	8.20945	6.64386	6.64386	6.64386	7.86419	6.64386	7.93664	6.96578	6.9542	6.64386	6.64386	6.64386	7.89482	6.64386	6.64386	7.26679	7.40088	6.64386	6.74147	6.64386	6.64386
AC000115_cds1_at	6.64386	6.64386	6.64386	6.64386	6.64386	6.64386	6.64386	6.64386	6.64386	6.64386	6.64386	6.64386	6.64386	6.64386	6.64386	6.64386	6.64386	6.64386	6.64386	6.64386	6.64386	6.64386	6.64386	7.27612	6.64386	6.64386	6.64386	6.64386	6.64386	6.64386	6.64386	6.64386	6.64386	6.64386	6.64386	6.64386	6.64386	6.64386	6.64386	6.64386	6.78136	6.64386	6.64386	6.64386	6.64386	6.64386	6.64386	6.64386	6.64386
AC002045_xpt1_at	6.64386	7.75489	7.36632	8.02237	8.00562	7.82018	6.64386	6.64386	6.64386	9.01681	6.64386	6.64386	6.64386	6.76818	7.37504	6.67243	6.64386	7.01123	7.54689	6.64386	6.64386	7.91886	7.37504	7.50779	6.67243	6.64386	7.2384	7.37504	7.74147	6.64386	6.64386	7.41785	8.02237	7.01123	6.64386	7.49185	6.64386	7.22882	7.21917	7.08746	6.64386	7.42626	7.09803	6.64386	8.08746	6.64386	6.84549	6.67243	6.64386
AC002073_cds1_at	7.33092	6.64386	7.79442	8.16491	7.57743	8.12928	6.64386	7.90689	6.64386	6.64386	7.54689	6.64386	9.43254	9.11374	6.64386	9.43879	6.89482	7.26679	7.13955	6.64386	6.64386	8.34873	6.64386	6.64386	7.29462	6.64386	8.31288	7.06609	9.10329	6.64386	6.70044	7.8009	6.64386	7.37504	7.18982	7.80735	6.64386	6.64386	7.40088	6.64386	6.64386	6.65821	6.64386	6.64386	7.86419	6.64386	6.91886	6.64386	6.76818
AC002077_at	6.64386	6.64386	6.64386	7.91289	6.64386	6.64386	6.64386	6.64386	6.64386	6.64386	6.64386	6.64386	6.64386	6.64386	6.64386	6.64386	6.64386	6.64386	6.64386	6.64386	6.64386	6.64386	6.64386	6.64386	6.64386	6.64386	6.64386	6.64386	6.64386	6.64386	6.64386	6.64386	6.64386	6.64386	6.64386	6.64386	6.64386	6.64386	6.64386	6.64386	6.64386	6.64386	6.64386	6.64386	6.64386	6.64386	6.64386	6.64386	6.64386
AC002086_at	6.84549	6.64386	6.64386	6.64386	6.64386	6.64386	6.64386	6.64386	6.64386	6.64386	6.64386	6.64386	6.64386	6.64386	6.64386	6.9542	6.64386	6.64386	6.64386	6.64386	6.64386	6.64386	6.64386	6.70044	6.64386	6.64386	7.32193	6.64386	6.64386	6.64386	6.64386	6.64386	6.64386	6.64386	6.87036	6.64386	6.64386	6.64386	6.64386	6.64386	6.64386	6.64386	6.64386	6.64386	6.93074	6.64386	6.64386	6.64386	6.64386
AC002115_cds1_at	11.5929	11.207	11.0715	11.5689	12.0334	11.9805	11.6939	11.4538	11.5118	11.4062	10.2912	11.043	10.7952	11.3918	11.9651	11.5637	10.7465	11.3421	10.9091	10.6448	13.178	11.7465	11.1111	11.1618	11.9114	11.1984	11.5821	11.4919	11.6027	11.7773	11.9392	12.3998	10.703	11.9366	11.1267	12.3437	12.0577	11.5901	11.8013	11.4676	11.275	11.5043	12.1963	11.6398	11.8222	11.73	11.4046	11.577	12.1586
AC002115_cds3_at	9.96	8.84862	8.98299	9.21917	9.42836	9.69	8.93958	9.05799	9.32193	8.68299	8.86728	9.17493	8.99718	8.97441	8.83605	9.05799	8.56224	8.96867	9.44501	8.42206	8.48784	9.88111	9.65464	9.50779	9.71939	9.09803	9.67772	9.06609	9.31061	8.21917	8.72451	9.71081	9.62753	8.79442	9.50978	9.05799	9.90689	9.39874	8.73132	9.42206	9.82972	9.60548	9.73132	9.60177	9.50581	9.19476	9.11634	8.77808	8.88874
AC002115_cds4_at	6.64386	6.64386	6.64386	6.64386	6.64386	6.64386	6.64386	6.64386	6.64386	6.64386	6.64386	6.64386	6.64386	6.64386	6.64386	6.64386	6.64386	6.64386	6.64386	6.64386	6.64386	6.64386	6.64386	6.64386	6.64386	6.64386	6.64386	6.64386	6.64386	6.64386	6.64386	6.64386	6.64386	6.64386	6.64386	6.64386	6.64386	6.64386	6.64386	6.64386	6.64386	6.64386	6.64386	6.64386	6.64386	6.64386	6.64386	6.64386	6.64386
AC002115_rna2_at	8.3443	6.64386	8.58871	8.88264	9.06609	8.80413	8.93074	8.77149	8.90689	8.9542	7.6865	8.2854	8.33985	8.42206	9.44915	8.88874	8.76155	9.11374	8.52356	8.47168	8.29462	9.09011	6.67243	8.85798	8.90087	8.8857	9.17493	7.93664	8.62205	7.34873	8.74819	9.37287	6.64386	8.83289	8.49985	8.59619	9.33539	8.19967	9.17991	8.74819	8.26209	8.13443	9.37069	8.34873	8.7039	8.46352	9.35094	8.7879	9.26209
AC002450_at	7.26679	6.64386	6.64386	6.64386	6.64386	7.14975	6.64386	6.64386	6.64386	6.64386	6.64386	6.64386	6.64386	6.64386	7.15987	6.83289	6.64386	6.64386	6.64386	6.64386	6.64386	6.64386	6.64386	6.64386	6.64386	6.64386	6.64386	6.64386	6.64386	6.64386	6.64386	6.64386	6.64386	6.64386	6.64386	6.64386	6.64386	6.64386	6.64386	6.64386	6.64386	6.64386	6.64386	6.64386	6.64386	6.64386	6.64386	6.64386	6.64386
AC002464_at	6.64386	6.64386	6.64386	6.64386	6.64386	6.64386	7.6865	7.49185	6.64386	6.64386	6.64386	6.64386	6.64386	6.64386	7.35755	6.64386	6.64386	6.64386	6.64386	6.64386	6.64386	6.64386	6.64386	6.64386	6.64386	6.64386	6.64386	6.64386	6.64386	6.64386	6.64386	6.64386	6.64386	6.64386	6.64386	6.64386	6.78136	6.64386	6.64386	6.64386	6.64386	6.64386	6.64386	6.64386	6.64386	6.64386	6.84549	6.64386	6.64386
AC002486_at	7.74147	7.92481	7.01123	7.39232	7.02237	8.26209	6.64386	7.88874	7.74147	7.79442	6.91886	6.64386	6.65821	7.2384	6.64386	7.45121	7.2384	6.98868	8.14466	6.64386	6.64386	8.38802	6.78136	7.40939	8.11374	7.29462	6.94251	7.02237	7.76818	6.88264	6.64386	7.54689	8.41363	7.01123	8.37938	7	8.45943	6.76818	7.2384	7.70044	7.33985	7.21917	8.27146	6.64386	7.45943	7.56224	6.67243	7.56986	6.64386
AD000092_cds1_at	6.64386	10.0028	7.29462	7.98868	8.69349	6.64386	7.66534	6.64386	6.64386	8.0607	6.64386	6.64386	7.16993	6.64386	9.14466	6.64386	7.7211	6.64386	6.64386	6.64386	8.10329	6.64386	7.67948	8.77479	7.87652	8.19967	6.64386	6.64386	6.64386	8.5157	6.64386	7.52356	10.5878	9.21675	7.69349	6.64386	6.76818	9.02237	6.64386	8.64746	6.64386	7.55459	7.49185	7.08746	7.66534	8.98014	6.78136	6.96578	6.64386
AD000092_cds2_at	6.64386	6.64386	6.64386	6.64386	6.64386	6.64386	6.64386	6.64386	6.64386	6.64386	6.64386	6.64386	6.64386	6.64386	6.64386	6.64386	6.64386	6.64386	6.64386	6.64386	6.64386	6.64386	6.64386	6.64386	6.64386	6.64386	6.64386	6.64386	6.64386	6.64386	6.64386	6.64386	6.64386	6.64386	6.64386	6.64386	6.64386	6.64386	6.64386	6.64386	6.64386	6.64386	6.64386	6.64386	6.64386	6.64386	6.64386	6.64386	6.64386
AD000684_cds1_at	6.64386	6.64386	6.64386	6.64386	6.64386	6.64386	6.64386	6.6865	6.64386	6.64386	6.64386	6.64386	6.64386	6.64386	6.64386	6.64386	6.64386	6.64386	6.64386	6.64386	6.64386	6.64386	6.64386	6.64386	6.64386	6.64386	6.64386	6.64386	6.64386	6.64386	6.64386	6.64386	6.64386	6.64386	6.64386	6.64386	6.64386	6.64386	6.64386	6.64386	6.64386	6.64386	6.64386	6.64386	6.64386	6.64386	6.64386	6.64386	6.64386
AD001527_cds1_at	6.88264	6.79442	7.25739	6.64386	6.64386	8.46761	7.40088	7.2854	6.64386	6.64386	6.64386	6.6865	7.30378	6.64386	7.82018	6.96578	6.84549	7.8392	7.62936	6.64386	6.90689	6.64386	7.22882	7.11894	8.24317	6.64386	6.79442	7.55459	7.21917	6.64386	6.64386	6.83289	7.96	6.79442	7.13955	7.63662	7.82018	6.75489	7.80735	7.16993	7.78136	6.64386	7.46761	7.42626	6.76818	7.22882	6.64386	7.24793	7.53916
AF000177_at	6.64386	7.12928	7.56224	6.64386	8.81057	8.44708	6.64386	6.64386	6.94251	6.64386	6.64386	6.64386	6.64386	7.81378	8.04985	8.27612	6.87036	6.64386	6.88264	6.64386	7.26679	8.77479	6.64386	6.64386	7.31288	6.64386	6.64386	6.64386	8.17991	6.64386	8.54303	7.66534	8.31741	6.64386	6.64386	8.44294	7.22882	7.07682	8.12928	6.64386	7.45943	6.64386	8.35315	6.64386	8.92184	6.64386	8.44708	6.64386	7.63662
AF000231_at	6.64386	6.64386	6.64386	7.02237	7.70736	6.64386	7.19967	6.64386	6.64386	6.64386	6.64386	6.64386	6.64386	7.33985	8.04985	7.59246	7.20945	6.64386	6.64386	7.19967	6.64386	6.64386	6.64386	6.64386	6.64386	6.64386	6.64386	6.64386	6.64386	6.64386	7	7.20945	6.64386	6.64386	7.40088	6.64386	6.64386	6.64386	7.61471	6.64386	7.18982	6.64386	7.04439	6.64386	6.67243	6.64386	8.19476	6.64386	6.71425
AF000234_at	6.64386	6.64386	6.64386	6.64386	6.64386	6.64386	6.64386	6.64386	6.64386	6.64386	6.64386	6.64386	6.64386	6.64386	6.64386	6.64386	6.64386	6.64386	6.64386	6.64386	6.84549	6.64386	6.64386	6.64386	6.64386	6.64386	6.64386	7.11894	8.12412	6.64386	6.64386	6.64386	8.37938	6.64386	6.64386	6.64386	6.64386	6.64386	6.64386	6.64386	6.64386	6.64386	6.64386	6.64386	6.64386	6.64386	6.64386	6.64386	6.64386
AF000430_at	6.64386	6.64386	6.64386	6.64386	6.64386	6.64386	6.64386	6.64386	6.64386	6.64386	6.64386	6.64386	6.64386	6.64386	6.64386	6.64386	6.64386	6.64386	6.64386	6.64386	6.64386	6.64386	6.64386	6.64386	6.64386	6.64386	6.87036	6.64386	6.64386	6.64386	6.64386	6.64386	6.64386	6.64386	6.64386	6.64386	6.64386	6.64386	6.80735	6.64386	6.64386	6.64386	6.64386	6.64386	6.64386	6.64386	6.64386	6.64386	6.64386
AF000545_at	6.64386	6.64386	6.64386	6.64386	6.64386	6.64386	6.65821	6.64386	6.64386	6.64386	6.64386	6.64386	6.64386	6.64386	6.70044	6.64386	6.64386	6.64386	6.64386	6.64386	6.64386	6.64386	6.64386	6.64386	6.64386	6.64386	6.64386	6.64386	6.64386	6.64386	6.64386	6.64386	6.64386	6.64386	6.64386	6.64386	6.64386	6.64386	6.64386	6.64386	6.64386	6.64386	6.64386	6.64386	6.64386	6.64386	6.64386	6.64386	6.64386
AF000560_at	8.77808	8.62936	6.64386	7	7.6865	6.64386	8.87344	6.64386	7.03342	6.64386	8.32643	7.7211	6.64386	6.64386	6.64386	9.18488	8.99152	6.64386	6.64386	7.40939	6.64386	9.8009	6.80735	6.64386	9.43045	8.9629	9.24079	6.64386	7.65105	8.15987	6.64386	8.09803	9.47573	6.64386	8.83605	6.64386	8.55459	8.3443	7.7879	8.12928	8.49586	9.53138	8.20945	6.64386	6.98868	6.64386	8.8392	8.93369	6.64386
AF000562_at	10.0362	9.10329	10.3343	9.9629	10.0279	10.7665	8.25267	8.9571	9.19967	9.7039	7.71425	8.5157	9.72792	9.46964	9.94398	9.64205	9.02237	9.8933	6.97728	9.49985	10.0539	10.6821	10.5755	10.3902	9.63662	9.40088	10.5641	9.28309	10.567	9.68299	8.12928	10.2143	10.2738	10.0182	9.96867	10.1699	9.89633	9.98299	9.78953	9.81538	9.84549	10.7364	9.93074	9.91737	9.97728	9.65642	9.23601	9.66356	9.48382
AF000573_rna1_at	6.64386	6.64386	6.64386	6.64386	6.64386	6.64386	6.64386	6.64386	6.64386	6.64386	6.64386	6.64386	6.64386	6.64386	6.64386	6.64386	6.64386	6.64386	6.64386	6.64386	6.64386	6.64386	6.64386	6.64386	6.64386	6.64386	6.64386	6.64386	6.64386	6.64386	6.64386	6.64386	6.64386	6.64386	6.64386	6.64386	6.64386	6.64386	6.64386	6.64386	6.64386	6.64386	6.64386	6.64386	6.64386	6.64386	6.64386	6.64386	6.64386
AF000959_at	6.64386	6.64386	6.64386	6.64386	6.64386	6.64386	6.64386	6.64386	6.64386	6.64386	6.64386	6.64386	6.64386	6.64386	6.64386	6.64386	6.64386	6.64386	6.64386	6.64386	6.64386	6.64386	6.64386	6.64386	6.64386	6.64386	6.64386	6.64386	6.64386	6.64386	6.64386	6.64386	6.64386	6.64386	6.64386	6.64386	6.64386	6.64386	6.64386	6.64386	6.64386	6.64386	6.64386	6.64386	6.64386	6.64386	6.64386	6.64386	6.64386
AF001294_at	6.64386	7.75489	6.64386	6.79442	6.64386	6.64386	7.78136	6.64386	6.64386	7.17991	6.64386	8.32643	6.64386	6.64386	7.06609	6.64386	6.64386	7.56224	6.64386	6.64386	8.75822	6.64386	8.57743	7.5157	6.64386	6.64386	7.77479	6.64386	6.64386	6.64386	6.64386	8.18488	6.64386	8.86728	6.64386	6.64386	6.64386	7.59246	6.64386	6.70044	7.9542	8.69697	6.64386	6.64386	6.64386	6.64386	6.64386	6.64386	6.64386
AF001620_at	6.64386	6.64386	6.64386	6.64386	6.64386	6.64386	6.64386	6.64386	6.64386	6.64386	6.64386	6.64386	6.64386	6.64386	6.64386	6.64386	6.64386	6.64386	6.64386	6.64386	6.64386	6.64386	6.64386	6.64386	6.64386	6.64386	6.64386	6.64386	6.64386	6.64386	6.64386	6.64386	6.64386	6.64386	6.64386	6.64386	6.64386	6.64386	6.64386	6.64386	6.64386	6.64386	6.64386	6.64386	6.64386	6.64386	6.64386	6.64386	6.64386
AF002020_at	7.12928	8.24317	7.21917	8.30834	8.00562	8.24793	7.3837	7.93664	7.27612	7.7879	7	7.40939	7.02237	7.74147	7.5157	7.74147	6.64386	7.67243	7.88264	6.64386	6.64386	8.12928	6.64386	7.07682	8.24317	7.97154	8.31288	7.37504	7.63662	6.64386	6.67243	7.65821	7.21917	6.64386	6.64386	6.87036	7.45121	7.87652	7.22882	7.14975	7.7879	7.76155	7.13955	7.41785	6.64386	7.04439	7.6865	7.74819	7.96
AF002224_at	9.61839	8.8392	7.53916	8.74819	8.44294	9.42836	8.03342	7.62205	8.36632	9.89785	7.97728	8.77808	7.96578	8.55842	8.73809	7.74147	8.3443	8.2854	8.29462	8.52356	8.42626	7.67948	9.26913	9.47371	8.26679	8.13443	6.75489	6.74147	8.98584	9.35535	7.06609	8.45943	9.17243	8.99152	7.49185	8.53916	8.93958	9.04439	7.33985	8.8009	9.04166	9.80252	8.90689	8.71768	8.01681	8.3837	6.79442	6.64386	8.99152
AF002700_at	7.80735	8.60733	8.79116	8.36194	8.15482	9.48382	6.64386	8.90087	8.84235	8.61471	7.54689	8.16491	8.64746	8.59619	9.50581	7.19967	7.5157	8.43879	8.64024	7.60733	7.33092	9.01402	9.25503	9.15228	8.44708	8.2384	8.60363	8.89785	9.12153	8.3966	7.93664	9.83605	9.0607	7.86419	8.54303	8.90689	9.74147	8.98299	7.73471	8.69349	9.59246	9.70736	8.81057	7	7.24793	8.50383	7.65105	8.11374	7.12928
AF003743_at	6.64386	9.59619	6.64386	6.64386	6.64386	8.73132	6.64386	8.69	6.94251	6.64386	6.80735	9.0954	8.56224	7.76818	6.64386	6.64386	7.44294	6.64386	6.64386	6.64386	6.64386	9.04985	9.40727	9.31288	7.73471	6.64386	6.64386	8.32643	6.64386	6.64386	6.64386	6.64386	9.98442	8.79442	8.91886	8.92184	6.64386	9.22159	7.27612	8.96867	9.59619	9.93958	6.64386	6.64386	6.64386	8.98014	6.67243	8.29002	8.24317
AF005037_at	6.64386	6.64386	6.64386	6.64386	6.64386	6.64386	6.64386	6.64386	6.64386	6.64386	7.04439	6.64386	6.64386	6.64386	7.2854	7.90689	6.64386	6.64386	6.64386	6.64386	6.64386	6.64386	6.64386	6.64386	6.64386	6.80735	6.64386	6.64386	6.64386	6.64386	6.64386	6.64386	6.64386	6.64386	6.64386	6.64386	6.64386	6.64386	6.78136	6.64386	6.64386	6.64386	6.64386	6.64386	6.64386	6.64386	6.85798	6.64386	6.64386
AF005043_at	6.64386	6.64386	6.64386	6.97728	7.76155	6.64386	6.64386	6.64386	6.64386	6.64386	6.64386	6.64386	6.64386	6.64386	6.93074	6.70044	6.64386	6.64386	6.64386	6.64386	6.64386	6.64386	6.64386	6.64386	6.64386	6.64386	6.64386	6.64386	6.64386	6.64386	6.64386	6.64386	6.64386	6.64386	6.64386	6.64386	7.34873	7.11894	6.74147	6.64386	6.64386	6.64386	6.64386	6.64386	6.64386	6.64386	7.2384	6.64386	6.64386
AF005361_at	6.64386	6.64386	6.64386	6.64386	6.64386	6.64386	6.64386	6.64386	6.64386	6.64386	6.64386	6.64386	6.64386	6.64386	6.64386	6.64386	6.64386	6.64386	6.64386	6.64386	6.64386	6.64386	6.64386	6.64386	6.64386	6.64386	6.64386	6.64386	6.64386	6.64386	6.64386	6.64386	6.64386	6.64386	6.64386	6.64386	6.64386	6.64386	6.64386	6.64386	6.64386	6.64386	6.64386	6.64386	6.64386	6.64386	6.64386	6.64386	6.64386
AF005775_at	9.29921	10.7797	8.16993	8.47978	8.3443	9.54496	8.01123	9.21189	7.03342	8.65821	8.14975	7.36632	9.37069	9.43879	8.54689	8.66534	9.50779	8.82655	8.69349	8.70044	8.45533	9.89026	10.3934	9.79442	9.53722	8.84862	7.94837	8.41363	9.68825	9.15735	8.84549	9.3966	9.97298	10.2503	8.81698	9.33762	9.71768	9.05257	9.00562	8.92778	8.65464	9.39017	8.94251	8.7211	8.45533	8.45943	8.8392	8.99435	8.72792
AF005887_at	6.64386	6.64386	6.64386	6.64386	8.24793	6.64386	6.64386	6.64386	6.64386	6.64386	7.13955	6.64386	6.64386	6.64386	6.74147	6.64386	6.97728	6.64386	6.75489	7.73471	7.66534	6.64386	7.70736	7.81378	6.64386	6.64386	7.11894	6.96578	6.64386	6.64386	6.64386	8.17991	7.12928	7.40088	7.62205	6.89482	8.19476	6.88264	7.64386	6.64386	7.49985	7.6865	6.64386	6.64386	7.24793	6.64386	7.09803	6.64386	6.6865
AF006041_at	10.9972	10.4767	7.7211	10.4969	10.23	6.64386	9.66	8.97154	9.87344	9.09276	10.1636	9.18735	8.57365	9.33539	6.64386	9.94691	8.10329	9.21432	9.73471	10.007	6.64386	9.71768	9.37721	8.93074	9.51373	9.13955	10.1267	9.99577	9.87652	9.23362	8.95128	6.64386	10.865	8.7879	9.8857	7.47573	10.9737	9.00843	8.90087	9.11114	10.0674	11.0539	9.53722	9.29692	9.42206	7.49985	10.4717	9.58496	8.64386
AF006084_at	9.84862	9.65284	8.44294	8.97728	10.2866	10.007	9.67419	8.81698	9.54689	9.60918	9.67948	8.49185	9.52748	9.8857	10.4378	10.7465	9.22882	8.83289	8.99152	9.91139	11.5906	10.2644	9.73471	9.79279	10.0042	9.50184	10.4284	9.88111	10.1383	9.95128	8.98868	11.5411	10.809	11.0077	10.2167	9.75822	10.4594	9.88874	10.1408	9.94105	10.3298	9.14466	9.66711	9.57932	8.84549	10.098	10.007	9.89633	10.0593
AF006087_at	8.75489	8.57743	9.73809	9.14211	8.92184	9.97585	8.5812	8.15987	9.56415	9.28309	8.73132	8.59991	9.11894	9.22159	10.4838	8.56986	10.0028	9.3966	8.67596	9.2384	8.36632	8.90388	9.47168	8.80413	8.40088	8.66534	9.68825	9.27146	9.66178	8.11374	7.45943	9.79928	9.66711	9.83763	8.53138	10.5177	10.3815	9.10852	9.47371	7.82655	9.04985	9.04166	10.7254	9.32643	8.633	8.31741	9.12928	9.1472	9.05528
AF006609_at	6.6865	6.64386	8.69	6.64386	6.64386	6.64386	6.64386	6.64386	6.64386	6.64386	6.64386	6.64386	6.64386	6.64386	6.82018	7.5157	6.64386	6.64386	6.64386	6.64386	6.64386	6.64386	6.64386	6.64386	6.64386	6.64386	6.64386	6.64386	6.64386	6.64386	6.64386	6.64386	6.64386	6.64386	6.64386	6.64386	6.64386	6.64386	7.43463	6.64386	6.64386	6.64386	6.64386	6.64386	6.64386	6.64386	6.64386	6.64386	6.64386
AF007111_at	8.69697	6.64386	8.22882	7.02237	6.91886	8.5157	6.94251	9.13955	6.80735	7.20945	8.14466	7.63662	7.79442	7.87036	7.54689	7.9542	8.04985	7.80735	8.33985	8.38802	7.08746	8.43045	6.64386	8.01123	7.69349	6.75489	7.91289	6.64386	7.43463	6.64386	6.64386	7.60733	8.40088	7.59991	8.36632	6.64386	8.74147	8.81057	6.93074	7.93664	7.16993	7.47573	7.40088	6.64386	7.50779	6.64386	8.09276	7.36632	7.30378
AF007551_at	7.07682	6.64386	8.07682	7.2384	7.49185	6.64386	7.47573	6.93074	6.98868	6.64386	8.42206	6.64386	8.93664	6.64386	7.39232	8.14466	7.31288	6.64386	6.64386	6.64386	6.64386	6.87036	7.33985	6.9542	7.59246	7.44294	6.94251	6.64386	6.64386	6.64386	6.64386	6.64386	6.82018	6.64386	7.13955	6.64386	6.64386	6.64386	7.93074	6.64386	8.86109	8.54689	6.64386	6.64386	6.64386	7.18982	6.80735	7.66534	8.30834
AF007875_at	7.74147	7.33092	7.59991	8.19967	9.87958	8.28077	8.43045	8.45121	7.74147	8.51175	6.64386	7.09803	8.50383	8.47168	9.59246	8.80413	8	7.3837	7.70044	8.47168	7.46761	8.77149	8.11374	8.26679	7.34873	7.19967	6.94251	7.83289	8.07682	7.36632	8.11894	8.25267	8.04985	7.63662	8.02237	8.49985	8.64386	8.49586	8.60363	7.2854	8.14466	7.66534	8.27612	8.04985	8.27146	7.65105	9.08746	8.13955	8.84862
AF008445_at	6.64386	6.64386	6.64386	9.15735	7.45121	6.64386	6.6865	9.15987	8.49586	7.67243	6.64386	6.67243	6.64386	6.64386	6.64386	8.79116	7.66534	6.64386	6.64386	6.79442	6.64386	6.64386	6.64386	8.55842	6.64386	6.64386	6.64386	6.72792	6.64386	6.64386	6.64386	6.93074	6.64386	8.59246	6.9542	6.64386	6.64386	6.64386	6.64386	6.64386	6.64386	6.64386	6.64386	6.64386	6.64386	6.64386	7.30378	6.64386	6.64386
AF008937_at	8.65464	7.53138	8.07146	8.25739	7.80735	8.50779	7.43463	8.81698	8.85798	9.4818	8.71425	7.59991	8.84235	7.34873	9.04712	8.77479	8.17991	7.67243	8.91886	8.71081	6.64386	7.80735	8.37938	9.11894	8.81378	8.26679	8.10329	8.08215	7.88264	6.96578	6.64386	8.16993	9.08215	7.79442	8.40514	8.82337	8.21432	8.65464	8.78136	8.47978	8.30834	9.14975	8.20945	7.98299	8.06609	7.55459	8.16993	8.41785	8.5157
AF009301_at	6.64386	8.28077	7.67243	6.64386	8.76487	7.78136	8.14975	8.57743	7.87652	7.80735	7.10852	6.64386	6.64386	7.46761	8.87958	8.93074	8.00562	6.64386	7.16993	7.19967	6.64386	9.19967	6.64386	6.64386	7.37504	6.67243	6.90689	7.24793	7.71425	6.64386	6.64386	6.64386	7.91289	6.64386	8.16993	6.64386	6.64386	7.14975	7.74147	6.64386	6.64386	8.05528	6.64386	6.64386	8.49586	6.64386	8.78136	8.49586	8.2854
AF009368_at	10.4231	10.1459	8.71768	9.36851	9.65105	10.8082	9.23122	9.5216	9.42836	8.89785	9.75322	9.91588	8.47573	9.25267	8.90388	8.62936	9.33985	9.48382	10.0251	9.52552	9.50978	9.16239	8.78136	10.5068	10.1561	9.54689	10.032	9.55651	10.1176	10.1111	9.10852	10.3934	10.4939	9.97585	10.0112	9.31061	10.1984	10.0755	9.36194	10.4147	10.4757	10.5699	10.5565	8.81057	9.53333	9.58308	9.49586	10.1267	9.30606
AF009426_at	6.64386	6.64386	6.64386	6.64386	7.26679	6.64386	6.93074	7.30378	7.43463	6.64386	6.64386	6.64386	6.64386	6.64386	7.35755	6.64386	6.64386	6.64386	6.64386	6.64386	6.64386	6.64386	6.64386	6.64386	6.64386	6.64386	6.64386	6.64386	6.64386	6.64386	6.64386	6.64386	6.64386	6.64386	6.64386	6.64386	6.64386	6.64386	6.90689	6.64386	6.64386	7.40088	6.64386	6.64386	6.64386	6.64386	6.94251	6.64386	8.06609
AF009674_at	9.07682	6.64386	6.64386	8.79766	6.64386	7.17991	6.64386	8.66534	6.64386	6.64386	6.64386	6.64386	8.12928	6.64386	6.64386	6.64386	10.0674	8.8009	8.89482	6.64386	7.56224	8.40514	6.64386	6.64386	6.64386	6.64386	6.64386	6.64386	6.64386	6.64386	6.64386	6.64386	6.64386	6.64386	6.64386	6.64386	6.64386	8.26209	7.72792	8.29462	6.64386	8.37504	7.7879	6.64386	6.64386	6.64386	6.64386	6.64386	6.94251
AF010193_at	9.29232	7.42626	9.20701	7.02237	7.77479	8.87036	7.08746	8.15987	8.36632	8.10852	7.77479	8.19476	8.75822	8.5157	8.51175	8.61839	8.88264	6.80735	8.71081	6.64386	6.75489	9.11894	8.01681	7.33985	7.67243	6.64386	7.96578	7.44294	7.89482	8	6.64386	8.41363	8.75822	7.20945	6.64386	9.09803	6.64386	6.64386	7.31288	6.65821	6.89482	9.20212	7.93664	8.81698	6.64386	8.91886	8.8392	7.30378	7
AF012270_at	6.94251	7.22882	6.64386	6.64386	6.64386	8.2384	6.79442	6.64386	8.07146	7.70044	6.64386	7.45943	6.83289	6.64386	6.64386	6.64386	6.64386	6.64386	6.64386	7.89482	6.64386	7.55459	6.97728	7.76818	7.16993	8.00562	7.57743	6.64386	7.19967	6.64386	6.64386	6.74147	8.35755	7.33985	6.64386	7.11894	7.88874	6.70044	6.64386	6.64386	7.8009	8.70044	6.64386	6.64386	6.64386	6.64386	6.64386	6.71425	6.64386
AF014958_at	6.64386	6.64386	8.14466	6.64386	6.64386	9.14211	8.45943	6.98868	6.64386	7.98299	6.64386	6.64386	7.37504	6.64386	8.35755	7.35755	6.64386	7.63662	6.78136	6.64386	6.64386	6.64386	7.35755	8.53916	8.82337	7.86419	9.02791	6.64386	8.74483	6.64386	6.64386	8.30834	6.75489	7.59991	8.31288	7.92481	6.64386	6.75489	6.64386	6.80735	8.36194	7.37504	6.78136	7.31288	6.64386	6.64386	7.11894	6.80735	6.64386
AF015910_at	11.31	9.07682	10.8368	9.84549	10.0307	11.4194	7.78136	9.32418	8.97728	8.32643	8.08746	9.52552	10.0251	10.0954	10.2515	9.96	8.41785	10.1163	9.45533	6.89482	7.50779	9.27146	7.96	8.33092	10.2969	10.446	11.007	9.3966	10.8773	9.43045	10.0701	9.35755	10.5699	7.31288	10.2515	10.043	10.8297	10.0688	9.68299	8.62205	10.1724	10.7838	10.1762	9.81698	9.70908	7.47573	10.0728	7.41785	8.30378
AF015913_at	9.41996	8.57743	9.14466	9.05257	10.4838	9.85019	9.88111	8.37069	9.40514	9.50779	9.8933	8.57743	8.99152	8.56224	10.7168	11.0464	7.82655	9.83131	8.87036	8.29921	7.33985	9.02791	7.97154	8.83605	9.67066	9.0607	8.59246	8.03892	8.46352	8.07146	8.97728	9.44087	8.6865	7.59991	8.89482	9.25503	9.73132	9.43254	10.3487	8.43463	9.35094	9.10329	9.69	8.88264	8.77808	7.90087	10.6055	9.46148	9.87958
AF015950_at	6.64386	6.64386	6.64386	6.87036	6.64386	6.64386	6.64386	6.64386	6.64386	7.6865	7.49985	6.64386	6.64386	6.64386	6.64386	6.64386	6.64386	6.64386	6.64386	6.64386	6.64386	6.64386	6.64386	6.64386	6.76818	6.64386	6.64386	6.64386	6.64386	6.64386	6.64386	6.64386	6.64386	6.64386	6.64386	6.64386	6.64386	6.64386	6.64386	6.64386	6.64386	6.64386	6.64386	6.64386	6.64386	6.64386	6.64386	6.64386	6.64386
AJ000480_at	10.6303	9.10329	8.87036	8.59991	9.59246	10.6609	8.94837	9.01959	8.58871	10.5018	8.57365	9.10066	9.53138	9.48583	9.07948	9.43879	9.38802	9.33092	9.4818	8.56224	9.25267	11.5018	10.4522	10.4315	8.96578	8.35755	9.77643	8.42626	10.8502	9.91737	8.15987	10.4888	10.3421	9.41574	9.80574	9.54882	10.0348	9.98868	9.30834	9.55459	9.84549	7.98868	9.86728	9.06609	9.24555	8.83289	9.26913	9.20945	9.2854
AJ001047_at	6.64386	6.64386	6.64386	6.64386	6.64386	6.64386	6.64386	6.64386	6.64386	6.64386	6.64386	6.64386	6.64386	6.64386	6.64386	6.64386	6.64386	6.64386	6.64386	6.64386	6.64386	6.64386	6.64386	6.64386	6.64386	6.64386	6.64386	6.64386	6.64386	6.64386	6.64386	6.64386	6.64386	6.64386	6.64386	6.64386	6.64386	6.64386	6.64386	6.64386	6.64386	6.64386	6.64386	6.64386	6.64386	6.64386	6.64386	6.64386	6.64386
AJ001421_at	8.99718	9.46761	9.67066	9.80896	10.5236	9.00843	10.2216	10.314	9.93517	9.90539	9.22882	8.81698	8.66178	7.62936	10.8948	10.6511	8.29002	9.79442	8.7039	9.05257	10.3542	10.3945	9.50779	10.2192	10.7432	9.92778	9.04439	9.13955	9.15987	8.54689	9.88722	10.6366	10.5255	9.633	9.42417	9.69523	9.83605	9.93958	10.3376	9.53722	9.40939	9.04166	10.4009	9.39874	8.5812	9.26679	10.0647	9.97154	10.1111
AJ001487_at	6.64386	6.64386	6.64386	6.64386	6.64386	6.64386	6.64386	6.64386	6.64386	6.64386	6.64386	6.64386	6.64386	6.64386	6.64386	6.64386	6.64386	6.64386	6.64386	6.64386	6.64386	6.64386	6.64386	6.64386	6.64386	6.64386	6.64386	6.64386	6.64386	6.64386	6.64386	6.64386	6.64386	6.64386	6.64386	6.64386	6.64386	6.64386	6.64386	6.64386	6.64386	6.64386	6.64386	6.64386	6.64386	6.64386	6.64386	6.64386	6.64386
D00017_at	6.64386	11.1325	9.20457	10.4502	10.0566	11.207	11.4934	6.64386	6.64386	9.76818	8.55459	8.75822	6.64386	9.67596	12.4022	11.3712	10.7649	11.0512	6.64386	9.44294	12.9674	12.1421	11.0701	11.1105	12.2327	8.53528	11.5348	8.12412	11.4035	11.2497	8.59246	12.6531	10.5603	12.5772	6.64386	11.0168	10.6952	11.1092	12.5132	10.2155	11.144	9.98726	12.8628	10.5343	11.3032	10.4009	10.9469	9.48784	10.7541
D00591_at	6.64386	6.64386	8.16491	7.97728	7.53916	7.88874	8.53138	8.25267	8.14975	7.76155	8.75822	8.8857	7.73471	8.74819	9.02237	8.89178	6.64386	6.80735	7.21917	7.29462	8.58496	8.55459	6.64386	6.64386	7.90689	7.86419	8.10329	6.64386	6.64386	6.64386	6.64386	8.74819	6.89482	6.64386	7.42626	6.64386	8.33539	8.02791	9.06609	6.64386	7.71425	8.28077	7.59991	7.09803	8.18488	6.64386	7.16993	6.64386	8.03892
D00596_at	9.99859	9.20701	11.5372	10.6724	11.7138	10.633	11.2691	10.5953	11.9296	10.0647	11.0293	8.97154	7.25739	9.96867	10.7082	9.46964	7.69349	10.8857	10.5517	11.0888	7.61471	8.27146	10.1749	8.78136	11.0688	9.86264	7.77479	9.32193	8.47168	9.03892	11.2633	8.86109	8.30834	7.94837	10.8138	11.3603	11.9414	10.4898	11.2521	10.9986	9.53528	8.11374	12.6175	11.1137	11.8368	10.0126	12.0898	10.3332	11.0375
D00632_at	8.3966	8.85798	8.54303	8.36194	8.36194	8.37938	6.93074	6.64386	7.60733	7.61471	7.62205	7	7.45121	7.84549	7.69349	7.87652	6.64386	7.90087	7.05528	8.49185	7.8392	9.18982	8.21432	8.25739	8.31288	8.31288	6.97728	8.08746	6.96578	7.50779	7.43463	8.83605	8.94544	6.64386	7.59991	8.16491	9.44087	9.08746	6.70044	8.36632	9.19967	9.69174	7.46761	8.14466	8.15482	6.64386	6.64386	7.98868	6.87036
D00654_at	6.64386	6.64386	6.64386	6.64386	6.64386	6.64386	6.64386	6.64386	7	8.44294	6.64386	6.64386	6.64386	6.64386	6.64386	6.64386	6.64386	6.64386	6.64386	6.64386	6.64386	6.64386	6.64386	6.64386	6.64386	6.64386	7.20945	6.64386	6.64386	6.64386	6.64386	6.64386	6.64386	6.64386	6.64386	6.64386	6.64386	6.64386	6.64386	6.64386	6.64386	6.64386	6.64386	6.64386	6.64386	6.64386	6.64386	6.64386	6.64386
D00723_at	6.64386	6.64386	6.64386	6.64386	7.46761	6.64386	6.64386	6.64386	6.64386	6.64386	6.64386	6.64386	6.64386	6.64386	7.53138	6.64386	6.64386	6.64386	6.64386	6.64386	6.64386	6.64386	6.64386	6.64386	6.72792	6.64386	6.64386	6.64386	6.64386	6.64386	7.57743	6.64386	6.64386	6.64386	6.64386	6.64386	6.64386	7.08746	7.8009	6.64386	6.64386	6.64386	6.64386	6.64386	6.64386	6.64386	6.64386	6.64386	6.64386
D00726_at	8.35755	7.8392	11.5736	10.1948	8.73471	9.01402	7.49185	9.93664	7.74147	7.60733	7.96	8.05528	7.61471	8.09803	7.49985	8.53528	7.19967	8.42626	7.94837	6.85798	7.42626	9.44087	9.01123	8.55842	8.86419	7.8392	9.24793	8.17991	8.3443	7.13955	9.72962	8.04439	8.10852	8.09276	8.09803	8.75489	9.32193	8.14466	7.65105	7.70044	8.79766	9.64746	8.81698	8.40088	8.12412	6.64386	8.00562	8.20945	6.64386
D00760_at	8.83289	8.80413	9.82177	9.29921	10.5382	9.31288	9.15735	8.19476	9.55075	8.86419	9.02514	7.70044	8.38802	8.64024	10.043	9.83447	8.66888	8.64746	8.20945	8.69349	8.94544	8.95128	9.22159	8.33985	8.70044	7.56986	8.10329	8.02237	7.35755	8.30378	8.69697	8.42206	6.64386	8.74819	9.54303	9.21189	10.796	9.61287	10.1636	9.07682	9.60548	8.63662	10.6393	9.17742	10.2131	9.01402	9.25267	9.58871	10.0444
D00761_at	9.633	9.04712	10.0168	9.31741	11.4351	9.85019	9.9901	10.3912	10.7515	9.71253	10.697	10.0593	9.61655	9.88417	10.7715	11.102	10.224	9.65464	8.50383	9.95565	9.9263	10.5353	10.3998	10.8416	9.76155	7.99435	8.77479	8.56605	10.268	9.92926	10.7936	9.73809	6.64386	9.01123	9.34207	10.4717	10.1886	9.80252	10.4747	9.36413	9.48583	9.08215	10.4838	10.7022	10.5661	9.51373	10.6707	9.66711	10.5699
D00762_at	8.62571	8.55459	8.64024	9.01123	10.7202	8.74819	9.33539	8.31741	8.89178	8.27146	8.29002	8.14975	8.99718	8.90989	10.1383	10.3837	8.89482	8.97728	8.40514	9.28771	6.64386	9.65105	8.56986	9.16239	8.86728	8.7879	8.25739	8.64746	8.83605	8.43463	9.19476	9.43254	8.93664	8.59246	9.33316	9.61102	10.128	9.58871	10.2312	8.79442	9.40301	8.3966	9.42626	9.15482	9.64746	8.3837	10.0993	9.41996	9.74315
D00763_at	9.82177	10.5078	9.83447	10.9715	12.1699	11.2848	10.888	10.3498	10.6202	10.2058	9.82177	10.1948	9.42626	9.62753	12.0802	11.168	9.8009	10.1033	9.44087	10.1787	10.5411	10.2609	9.03892	9.52552	10.7398	9.20701	9.50383	10.1408	10.0901	9.93369	10.7863	10.7406	10.3597	10.2204	10.3707	11.1699	11.3864	10.4666	11.0196	9.89633	10.5632	9.84862	11.5694	10.6609	10.1202	9.30378	11.7164	10.7985	10.8971
D10202_at	6.64386	6.64386	6.64386	6.64386	6.64386	6.64386	6.64386	6.87036	6.72792	6.64386	6.64386	6.64386	6.64386	6.64386	6.64386	6.64386	6.64386	7.8392	6.64386	6.64386	6.64386	7.40088	6.64386	7.67948	6.64386	8.46352	7.48382	6.64386	6.64386	6.85798	6.64386	8.12412	8.57743	8.67948	6.64386	6.64386	6.64386	6.65821	6.64386	6.93074	6.64386	6.64386	6.64386	6.64386	6.64386	6.64386	6.64386	6.64386	6.64386
D10495_at	6.64386	6.64386	6.64386	6.64386	6.64386	6.64386	8.25739	7.09803	7.50779	7.10852	7.70736	8.44294	7.85175	6.88264	9.23122	6.64386	6.64386	6.64386	6.64386	7.76818	9.0634	10.3253	8.99435	10.1749	6.64386	9.13955	8.62571	7	6.64386	7.30378	7.32193	11.2467	11.3723	11.3123	6.64386	8.3837	6.64386	8.5157	8.67243	7.64386	8.57365	6.64386	6.64386	6.64386	6.64386	8.80735	6.64386	7.25739	7.60733
D10511_at	6.64386	7.34873	7.15987	8.85798	9.72451	6.64386	8.09276	6.64386	6.64386	8.29462	7.8392	7.63662	6.64386	6.64386	9.94544	9.81218	6.64386	8.27146	6.64386	8.14975	7.49185	6.64386	7.04439	8.11894	7.10852	8.2384	6.64386	8.16993	8.16993	7	7.98868	8.69697	8.13443	7.76155	6.64386	6.64386	7.22882	8.53138	9.46964	6.89482	7.24793	6.64386	7.99435	7.37504	7.2854	8.30378	8.99152	7.92481	8.28077
D10522_at	8.01123	7.72792	6.64386	6.74147	9.20945	6.64386	7.54689	7.21917	8.85798	6.64386	6.64386	6.64386	9.17742	9.84078	6.64386	6.64386	8.65821	6.64386	6.64386	6.64386	8.37938	9.39874	6.67243	9.30378	6.64386	6.75489	6.64386	7.61471	9.48985	6.64386	6.64386	10.4252	6.64386	8.58496	8.633	9.00843	8.42206	6.64386	6.64386	6.64386	6.64386	6.64386	6.64386	9.34873	9.10066	6.64386	10.4717	6.64386	6.64386
D10523_at	7.53138	8.69697	8.98584	6.82018	8.16491	9.20212	7.83289	6.90689	7.74147	7.2384	8.54303	7.34873	7.8009	8.94837	9.51175	8.10329	6.64386	8.9629	8.81378	7.82018	9.21189	8.57743	8.56986	9.26913	8.8392	6.64386	8.25739	7.46761	8.43463	7.46761	6.64386	9.64205	10.4605	9.38154	8.69697	9.32418	10.0403	9.29921	9.59059	9.2384	9.47168	7.87652	10.0993	8.71425	9.19229	8.17991	9.10329	10.0375	8.96578
D10656_at	7.64386	8.29002	7.39232	7.78136	6.64386	6.64386	6.64386	6.64386	6.94251	8.13443	6.64386	6.64386	7.67243	7.67948	7.56986	7.6865	8.21917	7.16993	6.64386	7.14975	7.85798	8.04439	8.67243	6.64386	8.15987	6.64386	7.37504	6.64386	8.17991	7.59246	7.26679	7	8.41363	7.88264	7.71425	7.37504	8.56986	6.80735	7.70736	8.01681	6.89482	6.64386	6.64386	6.64386	7.43463	6.64386	7.70736	6.64386	6.64386
D10704_at	6.64386	6.64386	6.64386	6.64386	6.64386	6.64386	7.66534	6.64386	6.64386	6.64386	8.08746	6.64386	6.64386	6.64386	6.64386	6.64386	6.91886	6.64386	6.64386	7.09803	6.64386	6.64386	6.64386	7.54689	6.64386	6.64386	6.64386	7.34873	6.70044	6.64386	6.64386	7.70044	8.78463	7.33985	6.64386	6.64386	6.64386	6.64386	7.46761	6.64386	6.64386	6.64386	6.64386	6.64386	6.64386	6.64386	6.64386	6.64386	8.02791
D10923_at	6.64386	6.72792	6.64386	6.64386	6.64386	6.64386	6.64386	6.64386	6.64386	9.40301	6.64386	6.64386	6.84549	6.64386	6.64386	6.64386	6.64386	6.64386	6.64386	6.64386	6.64386	8.224	6.64386	8.31741	7.44294	6.64386	7.40939	6.64386	6.98868	7.17991	7.34873	7.24793	6.64386	6.64386	6.64386	6.64386	6.64386	6.64386	6.64386	6.64386	6.64386	6.64386	6.64386	6.64386	6.64386	8.04985	6.64386	6.64386	6.64386
D10995_at	9.32643	8.65105	6.74147	7.87652	8.77149	9.42206	7.91886	7.33092	7.67243	7.52356	8.72451	8.07146	7.8009	8.69349	7.62205	8.87036	8.11374	8.04439	8.82972	8.43045	6.84549	9	7.66534	8.85487	8.94251	7.78136	8.19476	8.01123	8.82972	8.15987	6.91886	9.26679	9.67596	8.58496	8.45121	7.96	9.58308	8.71425	7.48382	8.53528	8.37069	9.37721	8.96578	8.62936	8.02791	8.04439	8.85487	7.86419	6.64386
D11086_at	10.1319	10.6609	11.0098	9.57365	11.1941	11.1737	10.4727	9.37721	9.56224	9.93517	9.87191	10.2252	10.0875	9.81057	11.9281	10.783	10.5137	9.74987	11.0987	11.3231	9.06878	9.60177	10.1267	11.0546	10.6856	9.29921	10.1898	10.007	11.8214	9.65284	10.6193	8.65464	10.9084	10.8353	10.5479	11.8333	11.4783	10.8556	10.5575	11.7932	11.4367	11.3134	12.3633	10.8711	11.5498	11.3208	10.3652	12.1418	10.8345
D11094_at	6.64386	7.34873	9.18735	8.08215	8.72451	6.64386	8.18488	7.40939	7.14975	7.59246	6.64386	6.64386	8.59991	7.90087	9.15228	8.48784	8.56986	6.64386	6.94251	7.56986	6.64386	9.10852	6.64386	7.74819	8.16993	6.64386	6.64386	7.44294	6.64386	6.64386	10.0553	7.45121	6.75489	6.64386	6.64386	8.64024	6.67243	6.64386	8.97728	6.64386	6.64386	6.64386	8.25267	6.64386	10.0098	6.64386	7.9542	8.62571	8.61102
D11139_at	6.64386	6.64386	6.64386	6.64386	6.64386	6.64386	6.64386	6.64386	6.64386	6.64386	6.64386	6.64386	6.64386	6.64386	6.64386	6.64386	6.64386	6.64386	7.31288	6.64386	6.64386	6.64386	6.64386	6.64386	6.64386	6.64386	6.64386	6.64386	6.64386	6.64386	6.64386	6.64386	6.64386	6.64386	6.64386	6.64386	6.64386	6.64386	6.64386	6.64386	6.64386	6.64386	6.64386	6.64386	6.64386	6.64386	6.64386	6.64386	6.64386
D11151_at	7.41785	6.64386	6.64386	6.64386	6.64386	7.08746	6.64386	6.64386	6.91886	6.64386	6.64386	6.76818	6.82018	6.64386	6.64386	6.64386	6.64386	6.64386	6.64386	6.64386	6.64386	7.62936	6.64386	6.64386	6.64386	6.64386	6.64386	6.64386	6.64386	7.21917	6.64386	6.64386	7.64386	6.72792	6.64386	6.64386	6.64386	6.64386	6.64386	6.64386	6.64386	6.64386	6.64386	6.64386	6.64386	6.64386	6.64386	6.64386	6.64386
D11428_at	6.64386	6.64386	6.64386	6.94251	6.64386	6.64386	6.64386	6.78136	6.64386	7.20945	6.64386	6.64386	7.69349	6.64386	8.13443	6.64386	6.64386	6.64386	8.87958	6.64386	6.64386	6.64386	6.64386	6.64386	6.64386	6.64386	6.64386	6.64386	6.64386	6.64386	6.64386	6.64386	6.64386	6.64386	6.64386	6.6865	6.64386	6.64386	6.64386	6.64386	6.64386	6.64386	6.64386	6.64386	6.64386	6.64386	6.64386	6.64386	7.16993
D12485_at	6.64386	6.64386	6.64386	6.64386	6.64386	6.64386	6.64386	6.64386	6.64386	6.64386	6.64386	6.64386	6.64386	6.64386	6.64386	6.64386	6.64386	6.64386	7.03342	6.64386	6.64386	7.41785	6.64386	6.64386	6.64386	6.64386	6.64386	6.64386	6.64386	6.64386	6.64386	6.64386	6.64386	6.64386	7.34873	6.64386	6.64386	6.64386	6.64386	6.64386	6.87036	6.64386	7.36632	6.64386	6.64386	6.64386	6.64386	6.64386	6.64386
D12625_at	6.64386	6.64386	6.64386	6.64386	6.64386	6.64386	6.64386	6.64386	7.37504	6.79442	6.64386	6.64386	6.64386	6.64386	6.64386	6.64386	6.64386	6.64386	6.64386	6.64386	6.64386	6.64386	6.64386	6.64386	6.64386	6.64386	6.64386	6.64386	6.64386	7.04439	6.64386	6.64386	6.64386	6.64386	6.64386	6.64386	6.64386	6.64386	6.64386	6.64386	6.64386	6.64386	6.64386	6.64386	6.64386	6.64386	6.64386	6.64386	6.64386
D12676_at	6.64386	6.64386	6.64386	6.64386	6.64386	6.64386	6.64386	6.64386	6.64386	6.64386	6.64386	6.64386	6.64386	6.64386	6.64386	6.64386	6.64386	6.64386	6.64386	6.64386	6.64386	6.64386	6.64386	6.64386	6.64386	6.64386	6.64386	6.64386	6.64386	6.64386	6.64386	6.64386	6.64386	6.64386	6.64386	6.64386	6.64386	6.64386	6.64386	6.64386	6.64386	6.64386	6.64386	6.64386	6.64386	6.64386	6.64386	6.64386	6.64386
D12686_at	6.64386	6.64386	6.64386	6.64386	6.64386	6.64386	6.64386	6.64386	6.64386	6.64386	6.64386	6.64386	6.64386	6.64386	6.64386	6.64386	6.64386	6.64386	6.64386	6.64386	6.64386	6.64386	6.64386	6.64386	6.64386	6.64386	6.64386	6.64386	6.64386	6.64386	6.64386	6.64386	7.47573	6.64386	6.64386	6.64386	6.64386	6.64386	6.64386	6.64386	6.64386	6.64386	6.64386	6.64386	6.64386	6.64386	6.64386	6.64386	6.64386
D12763_at	6.64386	6.64386	6.64386	6.64386	6.64386	6.64386	6.64386	6.64386	6.64386	6.64386	6.64386	6.64386	6.64386	6.64386	6.64386	6.64386	6.64386	6.64386	6.64386	6.64386	6.64386	6.64386	6.64386	6.64386	6.64386	6.64386	6.64386	6.64386	6.64386	6.64386	6.64386	6.64386	6.64386	6.64386	6.64386	6.64386	6.64386	6.64386	6.64386	6.64386	6.64386	6.64386	6.64386	6.64386	6.64386	6.64386	6.64386	6.64386	6.64386
D13118_at	11.4346	11.9866	11.3815	11.7052	11.7981	12.0921	11.1472	10.7549	10.7056	10.8719	10.8742	10.6484	10.8956	11.041	11.4194	11.6073	11.2784	11.4476	11.0098	10.683	11.5023	12.3671	11.7678	11.5013	11.363	11.158	11.432	10.9293	11.3886	11.2923	11.1693	12.0025	12.8424	11.7296	11.664	11.5142	11.9989	11.902	11.8971	11.584	11.7895	11.8653	11.8997	11.4231	11.2767	11.5216	11.5584	11.7339	11.4686
D13168_at	6.64386	6.64386	6.64386	6.64386	6.64386	6.64386	6.64386	6.64386	6.64386	6.6865	6.64386	6.64386	6.64386	6.64386	6.64386	6.64386	6.64386	6.64386	6.64386	6.64386	6.64386	6.64386	6.64386	6.64386	6.64386	6.64386	6.64386	6.64386	6.64386	6.64386	6.64386	6.64386	6.64386	6.64386	6.64386	6.64386	6.64386	6.64386	6.64386	6.64386	6.64386	6.64386	6.64386	6.64386	6.64386	6.64386	6.64386	6.64386	6.64386
D13264_at	6.64386	6.64386	6.64386	6.64386	6.64386	6.64386	6.64386	6.64386	6.64386	6.64386	6.64386	6.64386	6.64386	6.64386	6.64386	6.64386	6.64386	6.64386	6.64386	6.64386	6.64386	6.64386	6.64386	6.64386	6.64386	6.64386	6.64386	6.64386	6.64386	6.64386	6.64386	6.64386	6.64386	6.64386	6.64386	6.64386	6.64386	6.64386	6.64386	6.64386	6.64386	6.64386	6.64386	6.64386	6.64386	6.64386	6.64386	6.64386	6.64386
D13305_at	6.64386	6.64386	6.64386	6.64386	6.64386	6.64386	6.64386	6.64386	6.64386	6.64386	6.64386	6.64386	6.64386	6.64386	6.64386	6.64386	6.64386	6.64386	6.64386	6.64386	6.64386	6.64386	6.64386	6.64386	6.64386	6.64386	6.64386	6.64386	6.64386	6.64386	6.64386	6.64386	6.64386	6.64386	6.64386	6.64386	6.64386	6.64386	6.64386	6.64386	6.64386	6.64386	6.64386	6.64386	6.64386	6.64386	6.64386	6.64386	6.64386
D13315_at	8.40939	7.54689	10.151	9.60177	10.933	8.21432	9.44294	8.76487	9.82972	9.46148	9.47168	8.53528	8.26209	9.10591	9.89936	10.444	9.14466	6.64386	9.17742	8.85175	6.64386	9.04712	7.85175	9.10591	9.1267	7.90087	6.64386	7.70736	8.36194	7.82018	9.86109	9.16993	6.64386	7.97728	9.36632	9.97154	10.6475	8.9629	9.79604	9.12928	6.64386	7.52356	10.9211	9.86573	9.90689	8.91289	10.4828	9.15987	9.52552
D13370_at	10.4157	10.9166	10.29	11.1573	11.9407	10.4491	10.9801	10.0362	10.3476	10.9315	10.9315	10.5058	10.1408	10.2726	11.4486	11.6847	10.4388	10.7871	10.5517	10.8494	9.40088	10.8082	9.80896	10.978	11.4003	10.7177	10.0362	10.4848	9.41363	10.4522	10.5915	11.2174	11.0641	9.61655	10.9858	10.7582	11.2986	11.3718	11.6684	10.7022	10.4808	10.4818	11.5882	10.3977	11.0875	9.85487	11.3253	11.1855	11.1599
D13435_at	7.07682	8.01681	6.64386	7.75489	8.82337	8.14466	8.13443	6.64386	7.75489	7.87036	7.43463	7.09803	6.64386	7.2384	8.84549	8.19967	6.64386	7.56224	8.28077	6.64386	7.42626	7.21917	7.12928	7.32193	7.67948	7.53916	7.98299	7.27612	7.75489	7.05528	6.64386	8.45533	8.54689	7.96578	8.66888	6.64386	8.44294	8.74147	8.91886	6.64386	8.74147	6.64386	7.62936	7.09803	6.64386	7.32193	8.08746	7.97154	8.15482
D13540_at	6.64386	8.88874	6.64386	6.64386	6.64386	7.03342	7.35755	8.51964	6.88264	7.21917	7.8009	7.59246	6.64386	6.64386	6.64386	6.98868	6.64386	6.64386	6.64386	6.64386	6.64386	7.96	7.69349	7.55459	8.54689	6.94251	6.64386	6.64386	7.25739	6.64386	6.64386	6.85798	7.45943	6.64386	7.40088	6.64386	7.98868	7.65105	6.97728	7.3837	7.85175	7.9542	7.56986	6.64386	6.64386	6.78136	6.64386	6.64386	6.64386
D13626_at	6.64386	6.64386	6.64386	6.64386	9.31741	6.64386	6.64386	8.04439	6.64386	6.64386	6.67243	6.64386	6.64386	8.29921	10.2738	6.64386	6.64386	6.64386	6.64386	6.64386	6.64386	6.64386	6.64386	6.94251	6.90689	6.64386	6.83289	6.64386	6.64386	6.64386	6.64386	7.85175	6.64386	6.64386	6.64386	6.64386	6.64386	6.64386	6.64386	6.64386	6.64386	6.64386	6.64386	6.64386	6.64386	6.64386	9.49185	6.64386	6.64386
D13627_at	8.36632	9.08746	9.93369	10.0154	11.9274	8.77479	9.9629	10.236	9.27845	10.1762	10.242	8.7879	9.03617	9.38154	10.6978	11.5641	9.27845	9.11894	8.6865	10.1787	7.58496	8.71768	7.99435	8.35315	9.61471	8.44708	7.89482	9.11114	8.12412	8.65464	10.5372	9.8857	9.20457	9.76984	9.22882	9.93221	10.4747	9.44708	10.8447	9.49185	9.27612	8.59991	10.9556	10.1874	10.1749	7.01123	10.8114	9.94983	10.4818
D13628_at	7.8392	7.19967	6.78136	7.88874	6.72792	8	7.16993	6.64386	6.64386	6.64386	6.64386	6.64386	6.64386	7.46761	6.79442	7.22882	8.77149	6.98868	7.11894	6.64386	7.14975	8.45533	8.21432	7.90087	8.08215	9.21675	8.80735	7.02237	7.66534	6.96578	6.64386	8.31288	11.1836	6.64386	7.01123	6.82018	8.2384	7.54689	7.25739	6.64386	8.3443	6.64386	8.31741	6.79442	7.67243	6.64386	7.24793	8.36194	6.64386
D13630_at	8.48784	8.17493	9.2503	8.92184	9.75822	9.37287	9.39446	8.64746	8.90689	8.09276	8.53916	8.75822	8.77479	9.19229	9.63118	10.032	10.3454	8.09803	8.82337	8.13955	8.69	8.84549	8.75489	9.00282	8.02791	7.94837	8.35315	7.74147	8.81378	7.87036	9.28771	8.97154	8.09276	7.78136	9.38154	9.8933	10.128	9.21917	9.61839	8.20457	9.20212	9.05799	10.3185	8.99435	9.46148	8.75489	9.34651	9.3015	9.03067
D13633_at	6.64386	6.64386	7.69349	8.2384	8.89178	6.64386	6.80735	8.00562	7.93074	7.97728	6.64386	6.64386	6.64386	6.64386	6.64386	6.64386	6.64386	6.74147	6.64386	6.64386	6.64386	6.64386	6.64386	6.64386	6.64386	6.89482	7.26679	6.64386	6.64386	7.53138	6.64386	6.64386	6.64386	6.64386	7.44294	6.64386	7.43463	7.11894	7.20945	6.64386	6.64386	6.64386	7.70044	6.64386	7.08746	6.64386	8.93074	6.64386	7
D13634_at	6.84549	7.9542	6.64386	6.64386	7.93074	7.93664	6.64386	7.50779	7.53916	7.91289	6.64386	7.29462	7.06609	7.57743	7	7.67948	7.10852	7.04439	8.0607	6.64386	6.64386	8.03892	7.22882	7.17991	7.82018	6.64386	8.04985	7.33092	8.07682	7.13955	7.17991	8.03342	8.24317	6.90689	6.97728	6.64386	7.93664	7.25739	7.17991	7	7.47573	7.2384	6.64386	6.84549	7.58496	6.72792	7.88264	7.01123	7.13955
D13635_at	6.64386	6.64386	6.64386	6.64386	6.64386	6.64386	6.64386	6.64386	6.64386	6.79442	6.64386	6.64386	6.64386	6.64386	7.35755	6.64386	6.64386	6.64386	6.64386	6.64386	6.64386	6.64386	6.64386	6.64386	6.64386	6.64386	6.64386	6.64386	6.64386	6.64386	6.64386	6.64386	6.64386	6.64386	6.64386	6.64386	6.64386	6.64386	6.64386	6.64386	6.64386	6.64386	6.83289	6.64386	6.64386	6.64386	6.64386	6.64386	6.64386
D13636_at	7.60733	6.64386	6.64386	8.30834	8.81057	6.64386	8.59246	8.20457	7.46761	6.64386	7.59246	6.64386	6.64386	6.64386	8.54303	7.87652	8.43463	8.04439	8.15482	8.33092	7.71425	7.14975	6.64386	6.64386	8.41363	7.44294	6.64386	8.2854	6.64386	6.64386	7.52356	7.45121	9.14466	8.78136	6.64386	6.64386	6.64386	6.64386	8.00562	6.64386	8.39232	6.64386	7.43463	8	6.64386	6.64386	8.53138	7.7211	8.04985
D13637_at	7.33092	7.09803	6.64386	6.64386	8.75489	6.64386	7.08746	6.64386	6.64386	7.15987	6.64386	6.64386	7.70736	6.64386	6.64386	8.37069	6.64386	6.64386	6.64386	6.65821	6.64386	6.64386	6.64386	6.64386	6.64386	6.64386	6.64386	6.64386	6.64386	6.64386	6.64386	7.98299	6.64386	7.01123	6.64386	7.10852	6.64386	7.06609	6.64386	6.64386	6.64386	6.64386	6.64386	6.64386	6.64386	6.64386	8.41363	6.64386	8.10329
D13639_at	8.83289	11.7039	9.35535	11.4362	11.8037	10.3772	6.64386	10.8345	10.7398	10.5018	10.6909	7.32193	10.2336	10.115	11.6564	12.1007	10.1447	6.87036	10.5008	9.97441	7.33092	11.2137	8.12412	9.22159	10.4315	9.75489	11.0265	10.5088	11.2592	10.8486	10.3934	11.4115	10.0238	7.08746	12.2006	11.7172	6.64386	6.65821	10.3174	6.64386	7.26679	11.1836	10.8517	6.83289	6.64386	10.5803	12.0413	6.64386	8.01681
D13640_at	10.1098	10.2336	10.774	9.97728	9.86419	9.76321	9.88417	8.37069	9.41785	10.9922	10.6847	6.90689	9.01681	7.25739	11.899	10.6952	9.27146	9.22641	9.56796	11.1972	10.3998	10.1749	7.87652	10.196	10.3848	9.63662	9.31967	9.35755	10.2033	8.11374	6.64386	9.74483	10.9462	9.74651	9.35755	7.53138	8.73471	9.92926	10.224	8.97441	9.57743	8.56986	9.8392	6.64386	8.32643	10.4522	11.0355	7.29462	10.2348
D13641_at	9.56986	8.8392	9.63118	9.75322	9.44708	8.89785	9.67596	8.33092	9.24317	9.56224	8.69697	8.49586	9.7039	10.7465	11.1267	10.7415	10.6724	8.82655	9.04985	8.64024	7.41785	10.4878	9.8933	10.1228	9.98014	8.94544	8.25739	8.55075	10.6193	8.83605	10.6294	9	8.52356	8.43045	8.26209	10.4009	9.32193	8.87344	10.5058	8.99435	9.24793	9.28771	10.3902	9.71253	10.3354	9.57932	10.5157	9.60733	10.242
D13642_at	8.08746	7.22882	6.64386	6.64386	7.06609	7.43463	6.64386	8.2384	6.64386	6.64386	7.07682	6.64386	6.65821	6.64386	8.03342	7.87036	6.64386	6.64386	8.12928	6.64386	6.64386	6.64386	6.64386	6.64386	6.64386	6.64386	6.64386	6.64386	7.91886	6.64386	6.64386	7.11894	6.64386	6.84549	6.64386	8.53916	6.64386	7.87036	8.05528	7.2854	7.09803	7.59991	6.64386	6.72792	6.88264	6.64386	7.01123	6.64386	6.72792
D13643_at	6.64386	6.64386	6.64386	6.64386	6.64386	6.64386	6.64386	6.64386	6.64386	6.64386	6.64386	6.64386	6.64386	6.64386	6.64386	6.64386	6.64386	6.64386	6.64386	6.64386	6.64386	6.64386	6.64386	6.64386	6.64386	6.64386	6.64386	6.64386	6.64386	6.64386	6.64386	6.64386	6.64386	6.64386	6.64386	6.64386	6.64386	6.64386	6.64386	6.64386	6.64386	6.64386	9.6865	6.64386	6.64386	6.64386	6.64386	6.64386	6.64386
D13644_at	6.96578	6.64386	6.64386	7.08746	6.64386	7.47573	6.64386	6.64386	6.64386	6.64386	6.64386	6.64386	6.64386	6.64386	6.64386	6.64386	6.64386	6.64386	6.64386	6.64386	6.64386	6.64386	6.64386	6.64386	6.64386	6.64386	6.64386	6.64386	6.64386	6.64386	6.64386	6.64386	7.2384	6.64386	6.64386	6.64386	6.64386	6.64386	6.64386	6.64386	6.64386	6.64386	6.64386	6.64386	6.64386	6.64386	6.64386	6.64386	6.64386
D13645_at	6.64386	7.03342	6.64386	7.04439	6.64386	6.64386	7.45943	6.64386	6.64386	6.64386	6.64386	6.64386	6.64386	6.64386	7.29462	6.82018	6.64386	6.64386	6.64386	6.64386	6.64386	6.64386	6.64386	6.64386	6.64386	6.64386	6.64386	6.64386	6.64386	6.64386	6.64386	6.64386	6.64386	6.64386	6.64386	6.91886	6.64386	6.64386	8.14975	6.64386	6.64386	6.64386	6.64386	6.64386	6.64386	6.64386	7.14975	7.04439	7.85798
D13748_at	11.6551	12.1621	12.1494	12.7127	12.7349	11.9091	12.4054	11.9374	11.988	12.6715	12.5228	11.8634	11.5751	11.8009	12.7731	13.3761	11.6939	12.163	11.5353	10.5887	12.7104	13.4534	12.2653	12.8566	13.1072	12.3191	12.4663	11.8807	12.7324	12.1089	12.4207	13.147	12.3404	11.9858	11.2491	12.7495	12.6544	12.339	13.0314	12.3451	12.4094	12.635	13.047	12.5113	12.1777	12.3117	12.5113	12.6998	12.8469
D13789_at	6.64386	6.64386	6.64386	6.64386	6.64386	6.64386	6.64386	6.64386	6.64386	7.76155	6.64386	6.64386	6.64386	6.64386	6.64386	6.64386	6.64386	6.64386	6.64386	6.64386	6.64386	6.64386	6.64386	6.64386	6.64386	6.64386	6.64386	6.64386	6.64386	6.64386	6.64386	6.64386	6.64386	6.64386	6.64386	6.64386	6.64386	6.64386	6.64386	6.64386	6.64386	6.64386	6.64386	6.64386	6.64386	6.64386	6.64386	6.64386	6.64386
D13897_rna2_at	9.15228	10.3072	7.18982	9.2738	8.79442	9.58308	6.64386	7.96	7.87652	9.13186	6.64386	6.64386	8.35315	8.01123	8.78136	7.45943	8.73809	7.79442	8.41785	7.89482	8.78463	9.32643	9.07414	8.7211	9.29692	8.58871	9.20457	7.71425	8.02237	9.48382	6.82018	7.41785	9.17991	9.10066	9.12153	8.43463	9.38586	8.81378	7.69349	8.62205	8.89785	9.29002	9.19722	8.67596	8.79766	8.54303	8.19967	8.67948	8.3966
D13900_at	11.163	10.0728	10.821	10.6502	11.6587	11.2312	10.769	9.79116	10.8424	10.96	10.2276	10.4605	9.94544	10.6537	11.3853	11.3696	9.93369	10.7356	10.1774	10.8313	10.9233	10.6156	10.4676	10.1611	11.0641	9.97728	9.95855	9.9542	11.1026	10.5333	10.5285	11.5911	11.3886	10.6421	10.6742	10.796	11.0512	11.1867	11.2597	10.1085	11.0478	10.2095	11.3231	10.4522	9.74483	10.2252	11.0875	9.61287	11.7863
D13969_at	6.64386	6.64386	6.64386	6.64386	6.64386	6.64386	6.64386	6.64386	6.64386	6.64386	6.64386	6.64386	6.64386	6.64386	6.64386	6.64386	6.64386	6.64386	6.64386	6.64386	6.64386	6.64386	6.64386	6.64386	6.64386	6.64386	6.64386	6.64386	6.64386	6.64386	6.64386	6.64386	6.64386	6.64386	6.64386	6.64386	6.64386	6.64386	6.64386	6.64386	6.64386	6.64386	6.64386	6.64386	6.64386	6.64386	6.64386	6.64386	6.64386
D13988_at	10.5304	10.3038	10.2503	9.94105	10.3004	10.5068	10.4533	10.4325	10.9527	10.6733	10.6284	10.5118	9.25503	10.043	11.7078	11.744	9.14975	9.93811	8.97154	9.79604	6.64386	9.64205	9.69	10.4325	10.058	9.82972	9.11114	9.42626	9.65105	8.64746	9.63844	9.92778	9.84392	9.22882	10.8114	9.74819	11.0168	11.4599	11.796	10.1267	10.7056	9.67596	11.294	9.51175	10.5812	9.50184	10.6357	9.93221	10.8258
D14043_at	7.85175	10.4788	10.0941	11.5152	11.7645	9.633	9.80252	9.76487	9.25267	9.27845	10.0914	8.44294	9.49386	9.57365	10.3026	11.4089	10.3509	8.83289	11.1954	9.49985	9.62205	9.62936	8.70044	10.0485	9.90238	9.26444	8.91289	8.53528	9.21189	8.41363	9.97441	10.4019	11.1718	9.97585	10.1799	9.68475	9.74483	9.93664	10.7822	7.2384	10.0607	9.40301	9.65821	8.69	8.75822	8.87958	11.1157	10.332	10.6165
D14134_at	6.64386	6.64386	6.64386	6.64386	6.64386	6.64386	6.64386	6.64386	6.64386	6.64386	6.64386	6.64386	6.64386	6.64386	6.64386	6.64386	6.64386	6.64386	6.64386	6.64386	6.64386	6.64386	6.64386	6.64386	6.64386	6.64386	6.64386	6.64386	6.64386	6.64386	6.64386	6.64386	6.64386	6.64386	6.64386	6.64386	6.64386	6.64386	6.64386	6.64386	6.64386	6.64386	6.64386	6.64386	6.64386	6.64386	6.64386	6.64386	6.64386
D14446_at	7.67948	6.98868	7.81378	7.56224	7.90087	7.37504	6.64386	7.13955	6.64386	6.64386	6.64386	6.64386	6.64386	7.34873	6.64386	6.78136	6.64386	7.14975	7.31288	6.64386	6.64386	7.07682	7.08746	7.26679	7.06609	6.64386	8.11894	6.64386	6.91886	7.04439	6.64386	8.05528	8.53528	7.43463	7.45121	6.67243	8.10852	7.03342	7.15987	6.84549	7.85175	7.02237	7.27612	6.64386	7.41785	7.27612	7.3837	7.26679	6.64386
D14497_at	6.64386	6.64386	6.64386	6.64386	6.64386	6.64386	6.64386	6.64386	6.64386	6.64386	6.64386	6.64386	6.64386	6.64386	6.64386	6.64386	6.64386	6.64386	6.64386	6.64386	6.64386	6.64386	6.64386	6.64386	6.64386	6.64386	6.64386	6.64386	6.64386	6.64386	6.64386	6.64386	6.64386	6.64386	6.64386	6.64386	6.64386	6.64386	6.64386	6.64386	6.64386	6.64386	6.64386	6.64386	6.64386	6.64386	6.64386	6.64386	6.64386
D14520_at	6.64386	6.64386	6.64386	6.64386	6.64386	7.14975	6.64386	7.25739	6.64386	6.64386	6.64386	6.64386	6.64386	6.71425	6.64386	6.64386	7.02237	6.64386	6.64386	6.64386	6.64386	6.64386	6.64386	6.64386	6.64386	6.67243	6.64386	6.6865	6.87036	6.64386	6.64386	6.64386	6.64386	6.64386	6.64386	6.64386	6.64386	6.6865	6.64386	7.32193	6.64386	6.64386	6.64386	6.64386	6.64386	6.64386	6.64386	6.64386	6.64386
D14530_at	13.7057	13.9658	13.9658	13.9658	13.9658	13.9658	13.9658	13.9658	13.682	13.8821	13.8946	13.5593	13.9658	13.9658	13.9658	13.9658	13.9658	13.8592	13.8763	13.3906	13.9658	13.9658	13.9658	13.9658	13.819	13.9658	13.5458	13.9399	13.9658	13.9658	13.9658	13.9658	13.9658	13.8265	13.9658	13.9225	13.9658	13.9658	13.9658	13.5265	13.9658	13.8236	13.9658	13.9658	13.9658	13.9658	13.9658	13.9658	13.9658
D14533_at	6.64386	6.64386	6.64386	6.64386	6.64386	6.64386	6.64386	6.93074	6.64386	6.64386	6.64386	6.64386	6.64386	6.64386	6.64386	6.64386	6.64386	6.64386	6.64386	6.64386	6.64386	6.64386	6.64386	6.64386	6.64386	6.64386	6.64386	6.64386	6.64386	6.64386	6.64386	6.64386	6.64386	6.64386	6.64386	6.64386	6.64386	6.64386	6.64386	6.64386	6.64386	6.64386	6.64386	6.64386	6.64386	6.64386	6.64386	6.64386	6.64386
D14657_at	8.76818	8.6865	10.5897	10.7022	12.1402	9.633	9.71768	9.38802	10.1611	9.96145	8.69697	8.40939	6.64386	9.37069	10.0888	7.45943	7.44294	9.65464	10.3004	9.77479	7.33985	8.97728	9.58871	9.44708	10.2715	9.92481	7.11894	9.33762	7.82655	9.56415	10.3387	8.90087	6.79442	7.71425	9.78953	10.275	11.4838	10.1624	10.5793	10.2312	8.79116	8	11.8895	11.4445	11.2288	9.42206	11.3554	10.7855	10.749
D14658_at	8.79442	9.69349	9.18735	10.2276	11.0881	9.95274	9.74315	9.97154	9.92481	9.47371	9.12153	9.40939	7.8009	8.19967	10.2738	10.4429	8.08746	9.02514	9.82337	9.91886	8.02237	8.15482	8.17493	8.20945	9.97728	8.65821	8.2854	9.29462	8.61471	7.82655	9.04985	9.89026	8.99152	9.85953	10.2691	8.68299	10.1434	9.89482	10.2312	8.77149	9.87498	9.20945	10.7305	8.89785	9.0954	8.14466	10.5943	9.56033	10.4273
D14659_at	6.64386	6.64386	6.64386	6.64386	6.83289	6.64386	6.64386	6.64386	6.64386	6.64386	6.64386	6.64386	6.64386	6.64386	6.64386	6.64386	6.64386	6.64386	6.78136	6.64386	6.64386	6.64386	6.64386	6.64386	6.84549	6.64386	6.64386	6.64386	6.64386	6.64386	6.64386	6.72792	6.79442	6.64386	6.93074	6.64386	6.64386	6.64386	7.34873	6.64386	6.64386	6.64386	6.64386	6.64386	6.64386	6.64386	7.20945	7.03342	6.64386
D14660_at	6.64386	6.64386	6.64386	6.64386	7.16993	6.64386	6.70044	6.64386	6.64386	6.64386	6.64386	6.64386	6.64386	6.64386	6.64386	6.64386	6.64386	6.64386	6.64386	6.64386	6.64386	6.64386	6.64386	6.64386	6.64386	6.64386	6.64386	6.64386	6.64386	6.64386	6.64386	6.64386	6.64386	6.64386	6.64386	6.64386	6.64386	6.64386	6.64386	6.64386	6.64386	6.64386	6.64386	6.64386	6.64386	6.64386	6.64386	6.64386	6.64386
D14661_at	8.64386	8.08746	10.1033	8.35315	9.65284	8.30834	8.47168	8.33985	9.11634	7.05528	8.3966	7.91289	9.67419	10.4315	9.06878	9.87036	9.62022	7.29462	8.45121	7.66534	6.64386	9.68299	8.3966	9.08746	7.61471	6.64386	7.20945	7.54689	8.74483	8.20945	8.2384	8.34873	8.65464	7.90689	8.77149	9.56415	9.05257	8.45943	8.95128	8.2384	7.98299	8.3966	9.50779	9.18488	9.33539	8.50383	9.97728	7.74819	8.53528
D14662_at	8.7039	9.75322	8.94837	9.07682	10.6008	9.51767	9.69	8.9571	8.78136	9.10329	8.75822	9.36413	8.19476	9.08481	10.8963	10.4959	9.21917	9.27845	9.05799	9.59246	9.37721	8.81057	8.85798	9.34651	10.0196	8.34873	8.72451	9.13955	9.20701	9.27146	9.09011	9.27845	9.32643	8.44708	8.94251	10.2408	9.21432	9.53138	9.71253	9.10591	9.39232	9.69523	10.2981	9.62022	9.27845	9.43254	10.5068	9.35755	9.57932
D14663_at	9.224	7.65821	9.49185	8.64746	10.021	9.66888	8.65105	8.56605	8.50383	8.53916	7.48382	8.38802	9.39017	9.51175	10.4635	9.59059	8.7211	8.69349	7.49185	8.73809	6.78136	10.0196	8.96	9.33762	9.224	8.43045	8.85487	7.94837	9.71081	8.49985	9.03067	9.20457	8.22882	8.29921	8.77479	9.52943	9.85175	8.64024	9.30606	7.8392	9.06609	9.05528	10.0715	8.51175	9.70908	8.3837	9.47978	9.19229	9.50383
D14664_at	6.65821	6.64386	6.64386	8.2384	7.12928	6.64386	6.64386	6.64386	6.64386	6.64386	6.64386	6.64386	6.64386	6.64386	8.17991	7.34873	6.64386	6.80735	6.64386	6.64386	8.224	7.52356	7.7879	8.16491	9.35315	7.82018	7.73471	8.76155	7.82655	7.66534	6.64386	9.67772	6.9542	9.22882	6.64386	6.64386	6.64386	6.83289	7	6.64386	6.64386	6.74147	6.64386	6.64386	6.64386	6.64386	6.64386	6.64386	6.64386
D14678_at	6.64386	6.64386	6.64386	7.42626	6.64386	6.64386	7.97728	6.64386	7.56224	6.64386	7.54689	6.64386	6.64386	6.64386	6.64386	6.64386	6.64386	6.64386	6.64386	7.3837	6.64386	6.64386	6.64386	6.64386	6.64386	6.64386	6.64386	6.64386	6.64386	6.64386	6.64386	6.64386	6.64386	6.64386	6.64386	6.64386	6.64386	6.64386	6.64386	6.64386	6.64386	6.64386	6.64386	6.64386	6.64386	6.64386	6.96578	6.64386	6.64386
D14686_at	8.46761	8.85798	9.43463	8.79766	8.86109	9.05257	7.72792	7.46761	8.2854	6.79442	7.93664	7.32193	6.64386	7.96578	8.80413	8.21917	8.58496	7.91886	9.07146	8.12412	8.10329	9.19229	8.36194	6.93074	8.39232	8.29462	6.64386	6.64386	9.71081	8.11374	7.62205	8.46761	10.4858	8.80413	8.27612	8.19967	8.82337	8.43045	6.64386	8.09276	9.23122	9.65464	8.08215	7.47573	6.64386	6.64386	6.94251	7.97728	6.64386
D14689_at	9.12153	8.76818	8.80413	8.96	9.85331	10.314	9.61471	9.6987	9.21432	9.66711	9.81378	8.0607	7.36632	9.18488	10.5333	9.70563	8.97154	9.5812	9.94837	9.92333	10.1331	10.242	8.88264	9.43045	10.3072	9.17742	10.0112	9.91737	9.69174	9.72792	8.2854	10.3432	10.1662	9.41996	8.46352	8.96	9.77314	9.81218	9.04712	7.76818	10.2935	7.11894	8.08215	6.64386	8.21432	7.93074	9.94398	7.59246	10.1189
D14694_at	10.4828	10.1737	10.6156	10.9701	10.8788	10.9396	10.8788	9.98157	10.0768	10.9708	9.74651	10.3117	10.1874	10.3608	11.5897	10.8218	10.4543	10.5603	10.6147	9.5157	11.5479	10.4645	10.3095	9.96145	11.0668	10.544	10.567	10.6751	11.0492	10.6165	10.3185	11.5708	10.9322	10.5887	10.6193	10.9381	10.3761	11.0464	10.8872	10.032	10.8765	10.7372	11.2586	10.1874	10.5137	9.83763	11.0014	10.9469	11.2656
D14695_at	8.20945	7.6865	8.36632	8.92778	8.31741	9.05528	6.83289	7.45121	6.83289	8.7879	7.85798	6.64386	8.00562	8.24317	6.64386	8.72792	7.94837	7.24793	6.64386	6.64386	7.29462	8.7039	7.37504	7.55459	7.85798	7.61471	7.89482	7.8392	7.65105	8.86109	7	9.60363	8.91289	8.84862	7.53138	9.6865	8.32193	7.54689	6.70044	7.7211	7.01123	6.64386	9.31288	8.26209	10.5285	6.64386	8.33985	7.06609	7.35755
D14710_at	11.5118	11.638	11.7134	12.3298	12.6578	12.3772	12.4372	11.6786	11.9443	11.6707	11.7385	11.5353	11.1319	11.7415	13.1241	12.6598	11.4089	12.1199	11.5503	11.0701	11.8262	11.8194	11.7241	11.4331	12.7457	11.4843	11.2644	11.6402	11.5103	11.5999	12.526	12.5539	11.2461	11.3281	11.7069	12.5718	12.6195	12.452	12.8605	11.9304	12.1633	11.8361	13.1517	11.7707	12.5179	10.6046	12.543	12.4916	12.9161
D14811_at	7.89482	8.33539	8.29921	7.74147	8.7211	9.26679	8.30378	7.84549	6.64386	8.9629	6.64386	7.71425	8.69	8.81057	9.04712	8.9542	8.52748	7.77479	8.20945	6.64386	8.11894	9.57554	8.66534	9.06878	7.27612	8.39232	6.64386	6.64386	9.39017	7.59991	7.96	8.62205	9.04439	7.73471	6.76818	9.16491	8.29462	7.70736	6.64386	8.06609	8.58496	8.14466	8.08215	6.64386	9.0634	6.64386	6.64386	8.48382	8.02237
D14812_at	11.2312	10.3498	11.318	11.8178	12.6891	10.8376	11.2143	10.4594	10.7347	11.2503	11.1248	10.2155	10.7557	11.3015	11.9352	11.6528	11.1867	10.3253	10.5118	10.314	9.72451	12.1864	11.6865	11.1183	11.5887	10.5575	10.3859	10.8234	11.3939	10.7364	11.5646	11.5216	11.9844	10.8572	11.4969	11.6821	11.3918	11.0021	11.5594	10.445	10.9936	11.0272	11.7104	11.6027	11.3072	11.2131	12.3759	10.6275	11.4378
D14822_at	6.64386	6.64386	6.64386	6.64386	6.64386	6.64386	6.64386	6.64386	6.64386	6.64386	6.64386	6.64386	6.64386	6.64386	6.64386	6.64386	6.64386	6.64386	6.64386	6.64386	6.64386	6.64386	6.64386	6.64386	6.64386	6.64386	6.64386	6.64386	6.64386	6.64386	6.64386	6.64386	6.64386	6.64386	6.64386	6.64386	6.64386	6.64386	6.64386	6.64386	6.64386	6.64386	6.64386	6.64386	6.64386	6.64386	6.64386	6.64386	6.64386
D14823_at	6.64386	6.64386	6.64386	6.64386	6.64386	6.64386	6.64386	6.64386	7.05528	7.44294	6.64386	6.64386	6.64386	6.64386	6.64386	6.64386	6.64386	6.64386	6.64386	6.64386	6.64386	6.64386	6.64386	6.64386	6.64386	6.70044	6.64386	6.64386	6.64386	6.64386	6.64386	6.64386	6.64386	6.64386	6.64386	6.64386	6.64386	6.64386	6.64386	6.64386	6.64386	6.64386	6.64386	6.64386	6.64386	6.90689	6.64386	6.64386	6.64386
D14827_at	6.64386	6.64386	7.90087	6.64386	7.40939	6.64386	6.64386	6.64386	6.64386	6.64386	6.64386	6.64386	7.32193	6.64386	6.64386	6.64386	6.64386	8.24793	6.64386	8.12412	7.35755	6.64386	6.64386	8.12928	6.64386	6.64386	9.90839	8.61102	8.83605	6.64386	6.64386	7.33985	8.47978	6.64386	6.64386	6.64386	6.64386	6.64386	7.29462	6.64386	6.64386	6.64386	6.64386	6.64386	7.65821	6.64386	6.64386	7.36632	6.64386
D14838_at	6.64386	6.64386	6.64386	6.64386	6.64386	6.64386	6.64386	6.64386	6.64386	6.64386	6.64386	6.64386	6.64386	6.64386	6.64386	6.64386	7.80735	6.64386	6.64386	7.11894	6.64386	6.64386	6.64386	6.64386	6.64386	6.64386	6.64386	6.64386	6.64386	6.64386	6.64386	6.64386	6.64386	6.64386	6.64386	6.64386	6.64386	6.64386	6.64386	6.64386	6.64386	6.64386	6.64386	6.64386	6.64386	6.64386	6.64386	8.92778	6.78136
D14874_at	7.35755	7.54689	8.60363	7.10852	6.64386	6.64386	6.64386	6.90689	6.64386	7.09803	8.04439	7.31288	7.53138	6.79442	7.43463	8.67596	7.91289	7.14975	6.64386	6.64386	6.64386	7.97728	7.42626	7.74147	6.64386	6.91886	7.98299	6.64386	7.43463	7.82018	6.64386	7.53916	8.09276	7.29462	7.34873	7.45943	7.05528	6.64386	6.64386	7.34873	6.64386	6.64386	7.67243	7.21917	7.24793	8.24793	6.64386	7.13955	6.64386
D14878_at	7.89482	8.43463	8.77808	9.47978	10.0028	9.0607	9.48784	7.91886	8.29462	8.25739	7.89482	8.08746	8.51964	9.19722	9.87036	9.70217	8.96	9.30834	8.62936	8.27612	7.64386	9.03892	9.1267	9.02791	9.91588	7.98299	8.06609	8.46352	8.91588	9.57743	8.89178	9.5812	9.37504	8.53138	9.33092	9.55842	9.633	9.224	10.5098	8.83289	8.90087	8.79116	8.98868	8.17493	9.21675	7.36632	9.36413	9.04166	9.35094
D14889_at	9.0954	8.56605	8.15987	8.75489	8.63662	9.33539	6.79442	8.19476	7.82018	8.14975	8.01681	7.70044	8.65821	8.83605	8.20457	8.87036	9.11114	8.3966	9.05799	8.40088	8.25739	9.54303	9.1267	9.43671	9.48784	8.51964	9.33539	7.29462	9.22882	8.13955	8.01123	9.20701	9.71939	8.74147	9.37287	9.23122	9.72792	9.03892	8.41363	8.3837	8.56605	8.9571	9.04439	8.84862	8.57365	8.84862	8.32643	8.72792	7.67243
D15049_at	6.64386	6.64386	8.28077	6.64386	6.64386	6.64386	6.64386	6.64386	6.64386	6.64386	6.65821	6.64386	6.64386	7.03342	7.22882	7.88874	7.01123	6.64386	7.42626	6.64386	6.64386	8.76155	6.64386	6.64386	8.74819	6.64386	8.40939	6.64386	6.64386	6.64386	6.64386	7.77479	8.00562	6.64386	6.64386	6.64386	6.83289	6.64386	6.64386	6.64386	6.64386	6.64386	6.64386	7.34873	6.64386	6.64386	8.07682	6.64386	6.64386
D15050_at	8.8857	8.47168	11.2975	8.92184	9.29921	10.1812	8.75489	9.21189	7.29462	9.38586	11.0355	10.2143	10.2726	10.1124	10.858	11.2246	10.1935	9.15735	9.02237	8.89785	8.08746	9.66888	9.22159	9.55459	8.49586	7.86419	9.6987	8	9.26444	10.1202	9.23362	10.1611	9.54689	9.25974	9.25974	10.5382	9.66178	8.82337	10.1624	8.58496	10.6073	9.71768	9.633	9.01123	9.69523	9.64205	10.2738	8.28077	9.69174
D15057_at	8.52748	7.47573	9.21189	9.29462	11.3515	8.32193	10.4959	8.87036	8.83289	9.0607	9.70217	6.87036	7.99435	9.35315	9.43463	10.1898	7.89482	9.07948	8.10329	9.58308	10.1267	9.07682	8.75489	8.3837	9.60918	9.49785	9.63844	8.6865	8.41785	8.75822	10.0914	9.7039	7.2384	8.40088	8.40088	8.73132	9.56796	9.65284	11.6142	6.93074	11.2703	7.66534	9.69	9.30378	9.23601	8.40514	10.7731	8.81057	12.1846
D16181_at	6.64386	7.05528	6.64386	6.64386	6.64386	6.64386	6.64386	6.64386	6.64386	7.01123	6.64386	6.64386	6.64386	6.64386	6.64386	6.64386	6.64386	6.64386	6.64386	6.64386	6.64386	6.64386	6.64386	6.64386	7.24793	6.64386	6.64386	6.64386	6.64386	7.54689	6.64386	6.64386	7.07682	6.64386	6.64386	6.64386	6.64386	6.64386	6.64386	6.64386	6.64386	6.70044	6.64386	6.64386	6.64386	6.64386	6.64386	6.64386	6.64386
D16217_at	8.66888	9.76321	9.59805	8.52748	9.63481	9.55459	8.44708	8.9629	8.14466	9.04166	8.84549	9.19476	9.28309	9.14211	9.49586	9.76155	8.56986	8.24793	8.94837	8.81057	9.24793	10.0458	9.84078	8.80413	9.44294	8.66534	9.39446	8.08215	8.57365	8.01681	8.98868	10.3987	10.0782	10.8626	9.77149	8.42626	9.81858	9.43045	9.82018	8.56986	9.46557	8.90388	8.87036	8.54303	9.224	9.41996	9.18239	9.65284	8.7039
D16227_at	6.64386	6.64386	6.64386	6.64386	6.64386	6.64386	6.64386	6.64386	6.64386	6.64386	6.64386	6.64386	6.64386	6.64386	8.35315	6.64386	6.64386	6.64386	6.64386	6.64386	6.64386	6.64386	6.64386	6.64386	6.64386	6.64386	6.64386	6.64386	6.64386	6.64386	6.64386	6.64386	6.64386	7.76155	6.64386	6.64386	6.64386	6.64386	6.64386	6.64386	6.64386	6.64386	6.64386	6.64386	6.64386	6.97728	6.64386	6.64386	6.64386
D16294_at	7.56986	7.73471	8.50383	6.64386	9.27146	7.60733	8.55842	7.04439	8.70044	6.76818	9.0954	6.64386	6.64386	7.7879	9.33985	8.8392	7.90087	8.03342	7.88264	7.55459	6.64386	8.224	7.56224	8.19476	8.26209	6.64386	6.64386	6.97728	7.89482	7.02237	8.47573	7.40088	7.62205	6.88264	8.49985	8.97441	8.5812	7.97728	9.42417	7.6865	8.09276	6.64386	9.37287	7.73471	8.17493	7.7211	9.54496	8.53916	9.0634
D16350_at	6.64386	6.64386	6.64386	6.64386	6.64386	6.64386	6.64386	6.64386	6.64386	6.64386	6.64386	6.64386	6.64386	6.64386	6.64386	6.64386	6.64386	6.64386	6.64386	6.64386	6.64386	8.19476	7.08746	6.64386	6.64386	6.64386	6.94251	6.87036	6.64386	6.64386	6.64386	6.64386	6.64386	6.64386	6.64386	6.64386	6.64386	6.64386	6.64386	6.64386	6.64386	6.64386	6.64386	6.64386	6.64386	6.64386	6.64386	6.64386	6.64386
D16469_at	6.64386	7.82018	9.58871	9.77149	11.007	8.84549	9.01123	8.69	8.86109	9.7211	10.242	6.64386	9.23362	9.34651	11.0908	10.42	9.48382	9.54689	9.20212	10.4009	9.6987	10.9622	10.0954	10.4788	10.5575	9.50581	9.71939	10.2444	11.8521	9.40514	6.64386	10.0265	10.8517	10.0967	9.82337	9.46761	8.59991	9.02514	9.43045	8.22882	9.87958	8.25267	9.57743	8.12412	8.51175	9.63844	11.1427	8.37069	8.87958
D16532_at	6.64386	6.64386	6.64386	6.64386	6.97728	6.64386	7.36632	6.64386	6.64386	6.64386	6.64386	6.64386	6.64386	6.64386	6.64386	6.64386	6.64386	6.64386	6.64386	6.64386	6.64386	6.64386	6.64386	6.64386	6.64386	6.64386	6.64386	6.64386	7.55459	6.64386	6.64386	6.64386	6.64386	6.64386	6.64386	6.64386	6.64386	7.80735	6.64386	6.64386	9.70563	6.64386	6.64386	6.64386	6.64386	6.64386	6.64386	6.64386	6.64386
D16562_at	10.545	11.2825	11.5211	11.4089	11.8895	11.5348	11.2538	10.8742	11.5416	11.0519	10.6627	11.3923	9.97011	10.3498	12.1662	10.9039	10.4858	10.3026	10.809	11.4105	11.239	10.8025	11.3106	11.8376	11.8451	10.5255	10.6303	10.8903	11.2691	11.0175	11.5915	12.0768	10.2456	10.9084	11.2597	11.9196	11.902	11.7436	11.8757	11.6834	11.4558	11.5684	12.2485	11.4752	11.7549	11.5088	11.9396	11.7669	11.7026
D16581_at	10.8431	10.2819	10.544	9.62571	11.1567	10.9069	9.76155	11.0077	10.5971	10.2562	9.78953	9.72962	9.67948	9.46148	10.0593	10.1331	7.48382	9.33092	9.96434	9.82972	9.30606	10.2866	9.71768	10.2107	10.5527	9.16239	10.2784	8.99435	8.7211	7.71425	8.72451	9.68299	8.89785	8.63662	9.89482	11.2444	10.697	10.3151	10.2192	10.5038	10.0967	10.224	10.6147	9.51964	9.66356	10.0539	10.0512	9.5812	10.3276
D16583_at	6.64386	6.64386	6.64386	6.64386	6.64386	6.64386	6.64386	6.64386	6.64386	6.64386	6.64386	6.64386	6.64386	6.64386	6.64386	6.64386	6.64386	6.64386	6.64386	6.64386	6.64386	6.64386	6.64386	6.64386	6.64386	6.64386	6.64386	6.64386	6.64386	6.64386	10.6466	6.64386	6.64386	6.64386	6.64386	6.64386	6.64386	6.64386	6.64386	6.64386	6.64386	6.70044	6.64386	6.64386	6.64386	6.64386	6.64386	6.64386	6.64386
D16593_at	8.97154	7.92481	6.64386	6.82018	6.64386	10.314	8.76487	8.40088	7.20945	6.64386	8.49985	9.53916	7.94251	7.33985	9.03342	6.64386	8.14975	8.54689	7.35755	9.29232	8.47978	9.12153	9.2738	9.67948	7.15987	6.64386	11.2258	7.35755	8.71425	9.34207	8.59246	9.64566	9.16491	9	7.67243	9.16239	8.13443	9.58684	6.64386	8.71081	9.13186	8.90388	9.77808	7.34873	9.1472	7.96578	6.64386	8.78463	8.91588
D16626_at	6.64386	6.64386	6.64386	6.64386	6.64386	6.64386	6.64386	6.64386	6.64386	6.64386	6.64386	6.64386	6.64386	6.64386	6.64386	6.64386	6.64386	6.64386	6.64386	6.64386	6.67243	8.87036	6.64386	6.64386	7.02237	7.3837	6.64386	8.08746	7.21917	6.64386	6.64386	6.64386	6.64386	6.64386	6.64386	6.64386	6.64386	6.64386	6.64386	6.64386	6.64386	6.64386	6.64386	6.64386	6.64386	6.64386	6.64386	6.64386	6.64386
D16815_at	6.64386	6.64386	6.64386	6.64386	6.64386	6.65821	6.64386	6.64386	6.64386	6.64386	6.64386	6.64386	6.97728	7.03342	6.74147	6.64386	6.64386	7.04439	6.84549	6.64386	6.64386	6.64386	6.64386	6.83289	6.64386	6.78136	6.64386	6.64386	6.64386	7.34873	6.64386	6.64386	6.64386	6.64386	6.64386	6.64386	7.17991	7.08746	6.64386	6.64386	6.64386	7.93664	6.64386	6.64386	6.64386	6.64386	6.67243	7.04439	6.64386
D17357_at	6.64386	6.64386	6.64386	6.64386	6.64386	7.20945	6.64386	6.64386	6.64386	6.64386	6.64386	6.64386	6.87036	6.64386	6.64386	6.64386	6.64386	6.64386	6.64386	6.64386	6.64386	6.64386	6.64386	6.64386	6.64386	6.64386	6.64386	6.64386	6.64386	6.64386	6.64386	6.64386	7.87652	7.43463	7.06609	6.64386	7.69349	6.64386	6.64386	6.64386	6.64386	7.48382	6.64386	6.64386	6.64386	6.64386	6.64386	6.64386	6.64386
D17390_at	6.64386	6.64386	6.64386	6.64386	6.64386	6.64386	6.64386	6.64386	6.64386	6.64386	6.64386	6.64386	6.64386	6.64386	6.64386	6.64386	6.64386	6.64386	6.64386	6.64386	6.64386	6.64386	6.64386	6.64386	6.64386	6.64386	6.64386	6.64386	6.64386	6.64386	6.64386	6.64386	6.64386	6.64386	6.64386	6.64386	6.64386	6.64386	6.64386	6.64386	6.64386	6.64386	6.64386	6.64386	6.64386	6.64386	6.64386	6.64386	6.64386
D17391_at	6.64386	6.64386	6.64386	6.64386	6.64386	6.64386	6.64386	6.64386	6.64386	6.64386	6.64386	6.64386	6.64386	6.64386	6.64386	6.64386	6.64386	6.64386	6.64386	6.64386	6.64386	6.64386	6.64386	6.64386	6.64386	6.64386	6.64386	6.64386	6.64386	6.64386	6.64386	6.64386	6.64386	6.64386	6.64386	6.64386	6.64386	6.64386	6.64386	6.64386	6.64386	6.64386	6.64386	6.64386	6.64386	6.64386	6.64386	6.64386	6.64386
D17400_at	6.64386	6.64386	6.64386	6.64386	6.89482	6.64386	6.64386	6.64386	6.64386	6.64386	6.64386	6.64386	7.70736	9.20457	7.90689	8.24793	7.20945	6.64386	6.64386	6.64386	6.64386	6.64386	6.9542	6.64386	6.64386	6.64386	6.64386	6.64386	6.64386	6.64386	6.64386	6.64386	6.64386	6.64386	6.64386	6.64386	6.64386	6.64386	6.64386	6.64386	6.64386	6.64386	6.64386	6.64386	6.64386	6.64386	7.19967	6.64386	8
D17461_at	6.64386	7.08746	6.64386	6.64386	6.93074	6.64386	6.64386	6.64386	6.64386	6.64386	6.64386	6.64386	6.64386	6.64386	6.64386	6.64386	6.64386	6.64386	6.64386	6.64386	6.64386	6.64386	6.64386	6.64386	6.64386	6.64386	6.64386	6.64386	6.64386	6.64386	6.64386	6.64386	6.64386	6.64386	6.64386	6.64386	6.64386	6.64386	6.64386	6.64386	6.64386	6.64386	6.64386	6.64386	6.64386	6.64386	6.64386	6.64386	6.64386
D17516_at	8.59991	6.87036	6.64386	6.64386	7.76818	7.08746	6.64386	6.64386	9.22882	9.19476	8.52748	6.64386	6.64386	6.64386	6.74147	6.64386	7	7.06609	6.64386	6.64386	6.64386	6.64386	7.37504	7.79442	6.64386	6.64386	6.64386	6.76818	6.64386	6.64386	6.64386	6.76818	7.6865	6.64386	6.64386	6.64386	6.64386	6.64386	6.64386	6.64386	6.64386	7.09803	8.20457	6.64386	6.64386	6.64386	6.72792	6.64386	6.64386
D17525_at	10.1836	8.60363	9.54303	8.32643	9.25974	10.0417	7.64386	9.05257	8.45533	9.46964	6.64386	6.64386	8.71081	9.57175	8.94544	8.73132	8.98868	9.34651	9.13699	8.40088	8.49985	9.57932	9.42836	10.2276	8.15987	9.17742	9.02791	7.27612	9.07948	8.49185	6.64386	8.30834	10.4409	6.64386	7.20945	8.37069	10.062	9.55075	9.26913	9.50184	10.1344	9.79766	9.81538	9.09803	8.87344	6.64386	8.57743	8.72792	9.12153
D17716_at	9.03067	6.64386	8.66178	8.47978	9.29921	10.4336	7.81378	6.64386	8.08746	6.64386	8.11894	7.49185	8.82655	8.63662	7.71425	9.19722	8.67243	8.67596	9.04985	8.82018	6.64386	9.11114	8.74147	8.93074	9.04439	8.48784	9.7364	8.65821	9.23362	7.88264	7.50779	9.21917	10.444	6.64386	9.12153	9	10.0835	9.32867	8.57743	8.04439	8.98584	9.14211	8.73132	8.67596	9.33316	8.29462	9.07414	8.86419	8.41363
D21063_at	10.9256	8.56605	10.7969	10.6083	10.7245	8.93958	10.7665	9.67772	11.4476	10.7177	10.0553	7.90087	6.89482	9.64566	9.25503	7.12928	7.56224	10.7313	10.1611	11.1202	6.75489	6.64386	6.64386	6.64386	10.9425	8.92778	9.59246	10.2276	9.8392	8.24793	10.3219	8.94251	6.89482	7.37504	10.1306	10.6935	11.2033	9.72962	9.58684	10.2621	9.86728	8.21917	11.2252	10.9159	8.84549	7.6865	10.8122	9.56033	9.51175
D21089_at	9.12153	9.25974	8.17991	8.77808	9.73132	9.92184	9.00843	9.07146	9.2738	8.56224	8.86728	8.52356	9.34873	8.97154	9.8392	10.1898	9.0607	9.00562	9.7039	9.27612	8.27146	9.82018	9.28771	9.83763	9.61655	9.09276	9.38154	8.19476	8.90989	8.99718	8.78463	9.91289	10.6909	9.41151	9.90539	8.27612	10.2408	9.83605	9.44501	9.42836	10.4051	9.79766	9.67066	8.86728	9.07682	8.96867	9.50779	9.47776	9.23601
D21090_at	6.64386	7.64386	7.9542	8.10329	8.40088	7.36632	7.56986	6.64386	6.64386	7.61471	6.64386	6.64386	7.57743	7.77479	9.10852	8.2384	7.92481	6.64386	6.64386	6.64386	6.83289	7.26679	7.49985	7.69349	7.46761	6.64386	6.64386	6.94251	7.96	7.16993	7.82018	8.02791	7.47573	7.59991	7.41785	7.80735	8.53528	6.64386	8.40939	7.2384	7.59991	6.64386	8.224	7.34873	7.45943	6.90689	8.37504	8.17991	7.05528
D21163_at	6.64386	6.64386	6.64386	8.01123	6.64386	6.64386	6.64386	6.64386	6.64386	6.64386	6.64386	6.64386	6.64386	6.64386	7.35755	7.84549	6.64386	6.64386	6.75489	6.64386	6.64386	7.30378	7.56224	6.64386	6.64386	7.21917	6.64386	6.64386	6.64386	6.64386	6.64386	6.64386	7.94251	6.64386	6.64386	6.64386	6.64386	8.27612	6.64386	6.64386	7.93664	7.21917	6.64386	6.64386	6.64386	6.64386	7.44294	6.64386	6.64386
D21205_at	6.64386	6.64386	6.64386	6.64386	6.64386	6.64386	6.64386	6.64386	6.64386	6.64386	6.64386	6.64386	6.64386	6.64386	6.64386	6.64386	6.64386	6.64386	6.64386	6.64386	6.64386	6.64386	6.64386	6.64386	6.64386	6.64386	6.64386	6.64386	6.64386	6.64386	6.64386	6.64386	6.64386	6.64386	6.64386	6.64386	6.64386	6.64386	6.64386	6.64386	6.64386	6.64386	6.64386	6.64386	6.64386	6.64386	6.64386	6.64386	6.64386
D21239_at	7.19967	6.64386	6.64386	6.64386	6.64386	6.64386	6.64386	6.64386	6.64386	6.64386	6.88264	6.64386	6.64386	6.64386	6.64386	6.64386	6.64386	6.64386	6.64386	6.64386	6.64386	6.64386	6.64386	6.64386	6.64386	6.64386	6.64386	7.39232	6.64386	6.64386	6.64386	6.64386	6.64386	6.64386	6.64386	6.64386	6.64386	6.64386	6.64386	6.64386	6.64386	6.64386	6.64386	6.64386	6.64386	6.64386	6.64386	6.64386	6.64386
D21255_at	6.64386	6.64386	6.64386	6.64386	6.64386	6.64386	6.64386	6.64386	6.64386	6.64386	6.84549	6.64386	6.64386	6.64386	6.64386	6.64386	6.64386	6.64386	6.64386	6.64386	6.64386	6.64386	6.64386	6.64386	6.64386	6.64386	6.64386	6.64386	6.64386	6.64386	6.64386	6.64386	6.64386	6.64386	6.64386	6.64386	6.64386	6.64386	9.27146	6.64386	6.64386	6.64386	6.64386	6.64386	6.64386	6.64386	6.64386	6.64386	9.17493
D21260_at	7.92481	10.4757	10.137	10.0821	11.8857	10.4798	10.1911	10.2703	9.86419	9.69523	9.98726	9.31515	8.5157	9.27146	10.9737	11.0721	9.60733	9.39017	12.7132	10.3174	9.11114	10.8001	10.2456	9.77808	10.6856	8.94544	8.64746	9.71768	9.33316	7.92481	9.78463	10.7591	10.2324	10.4949	10.4512	9.26679	9.70217	10.4533	10.5517	8.15987	10.5784	12.1677	11.0417	8.69	10.4419	8.04985	11.2456	10.0279	10.7389
D21261_at	12.3731	12.6996	12.4993	12.0647	11.6896	13.5632	12.2926	10.9016	10.8803	12.2447	11.5479	12.5199	12.3565	12.6029	13.4844	12.9431	13.0415	12.431	12.2378	12.1286	13.9658	13.9658	13.6475	13.9099	12.6273	12.3168	12.9751	11.5746	13.9658	12.8611	12.3636	13.5643	13.6843	12.7341	12.9328	13.3383	13.6128	12.9093	13.3942	12.6821	12.817	13.3177	13.9658	13.8026	13.2219	12.8265	12.3578	12.9509	12.1092
D21262_at	6.64386	6.64386	6.96578	7.85175	7.94251	7.8009	8.35315	6.64386	6.6865	6.64386	7.71425	7.54689	6.64386	7.37504	8.98299	9.66356	7.10852	7.46761	6.64386	6.64386	6.64386	6.64386	6.64386	6.64386	6.64386	6.64386	6.64386	6.6865	6.64386	6.64386	8.67948	6.64386	6.64386	6.64386	6.93074	7.82655	8.08746	6.64386	8.81057	6.64386	6.9542	6.64386	9.07414	7.53916	8.36194	6.64386	9.08746	8.40514	8.13443
D21267_at	7.04439	6.64386	6.64386	6.74147	6.64386	7.32193	6.64386	6.64386	6.64386	6.64386	6.64386	6.64386	6.64386	6.76818	6.64386	6.64386	6.64386	6.64386	6.64386	6.64386	6.64386	6.64386	6.64386	6.64386	6.64386	6.64386	6.64386	6.64386	6.64386	6.64386	6.64386	6.64386	6.79442	6.64386	6.64386	6.64386	6.74147	6.64386	6.64386	6.64386	6.64386	7.32193	6.64386	6.64386	6.64386	6.64386	6.64386	6.64386	6.64386
D21337_at	7.02237	6.64386	6.64386	6.64386	6.64386	6.64386	6.64386	6.64386	6.64386	6.64386	6.64386	6.64386	7.16993	6.64386	6.64386	6.64386	6.64386	6.64386	6.64386	6.64386	6.64386	7.09803	6.64386	6.64386	6.64386	6.64386	6.90689	6.64386	7.30378	6.64386	6.64386	6.64386	6.64386	6.64386	6.64386	6.64386	6.64386	6.64386	6.64386	6.64386	6.64386	6.64386	6.64386	6.64386	6.64386	6.64386	6.64386	6.64386	6.64386
D21851_at	7.12928	6.87036	6.64386	7	7.2854	7.61471	6.64386	6.64386	6.64386	7.22882	6.64386	6.64386	6.64386	6.64386	7.04439	6.89482	6.64386	7.42626	6.64386	7.64386	6.64386	6.64386	7.63662	7.29462	6.72792	6.64386	7.98299	7.27612	7.65105	7.57743	6.64386	6.98868	7.45943	6.64386	6.64386	6.64386	6.64386	7.44294	6.98868	7.17991	7.40088	7.91289	7.31288	6.64386	6.64386	6.64386	6.65821	6.96578	7.16993
D21852_at	8.6865	8.73471	8.70044	8.87036	9.41996	9.46761	9.07948	8.64746	8.93369	8.65464	8.40939	8.80735	8.64024	8.29921	9.74651	9.09803	8.42626	8.0607	8.79766	7.45121	7.65821	7.87036	8.32643	8.62936	9.17493	6.64386	7.01123	7.6865	8.64386	8.10329	8.49985	8.07146	9.07414	8.78136	8.24793	9.46148	9.15228	8.53916	8.98584	9.04439	8.78463	9.17243	9.53333	8.43463	9.35975	7.88874	9.3015	8.8009	9.07948
D21853_at	8.63662	9.19967	10.4051	9.77808	10.5641	10.1774	10.1774	9.29232	9.49185	10.3185	10.2348	9.88417	8.37938	8.51175	10.5517	10.1898	8.10852	9.59991	7.35755	8.84549	9.64205	9.67419	8.60733	9.04166	9.53528	8.58871	9.26444	9.19229	9.37287	9.87191	9.49386	10.4367	9.00843	9.68299	9.11374	9.37287	9.38802	9.55459	9.97585	9.48784	9.62388	9.70736	9.96434	9.52943	9.85643	8.98014	9.78627	9.5157	9.72622
D21878_at	6.64386	6.64386	6.64386	6.64386	6.64386	6.64386	6.64386	6.64386	6.64386	6.64386	6.64386	6.64386	6.64386	6.64386	6.64386	6.64386	6.64386	6.64386	6.64386	6.64386	6.64386	6.64386	6.64386	6.64386	6.64386	6.64386	7.53138	6.64386	6.64386	6.64386	6.64386	6.64386	6.64386	6.64386	6.64386	6.64386	6.64386	6.64386	6.64386	6.64386	6.64386	6.64386	6.64386	6.64386	6.64386	6.64386	6.64386	6.64386	6.64386
D23660_at	13.4945	13.5511	13.6084	13.8145	13.9035	13.6278	13.9658	13.7929	13.9658	13.9658	13.7624	13.9264	13.9658	13.7067	13.9658	13.9658	13.562	13.7739	13.7004	12.9555	13.4524	13.4375	13.6242	13.9658	13.9658	13.8611	13.4919	13.9454	13.8073	13.6713	13.9658	13.9658	12.948	13.2575	13.3549	13.9658	13.4902	13.9658	13.9658	13.6066	13.3343	13.3537	13.9658	13.9658	13.9658	13.7786	13.8184	13.9658	13.9658
D23662_at	10.8895	10.3276	10.5304	10.8849	11.9647	10.8865	10.5943	9.94105	10.8517	10.5699	10.4909	9.94105	10.2527	10.6493	10.9352	11.2408	9.25503	10.5981	10.1972	10.2644	11.4157	10.1561	10.1724	10.2912	10.7099	9.29921	10.2204	10.4888	9.75822	10.4979	10.2491	11.0119	9.80896	10.7855	10.7674	11.5221	11.3498	10.9469	11.2167	10.8704	10.2761	10.8634	11.683	10.9024	10.858	10.3443	11.5939	10.5028	10.9629
D23673_at	11.461	10.9922	11.0954	10.7507	12.623	11.7275	11.2444	10.8963	11.4853	10.8138	11.7678	10.6421	10.744	11.0914	11.0133	12.0957	9.64746	10.6724	11.2981	11.3185	10.0334	11.1286	10.5333	9.98299	10.7364	9.90539	10.8392	10.0182	10.9951	10.69	9.97154	11.0279	11.4635	10.6129	11.8206	11.0382	11.2402	11.3292	10.9535	10.9106	11.233	11.4215	10.9922	10.5411	10.5934	10.5727	11.7834	10.6777	11.2802
D25215_at	6.64386	6.64386	6.64386	6.64386	6.78136	6.64386	7.14975	6.64386	6.64386	6.64386	6.64386	6.64386	6.64386	6.64386	6.64386	6.64386	6.64386	6.64386	6.64386	6.64386	6.64386	6.64386	6.64386	6.64386	6.64386	6.64386	6.64386	6.64386	6.64386	6.64386	6.64386	6.64386	6.64386	6.64386	6.64386	6.64386	6.64386	6.64386	6.64386	6.64386	6.64386	6.64386	6.64386	6.64386	6.64386	6.64386	7.14975	6.64386	6.64386
D25216_at	10.6193	9.3443	9.9263	9.56986	10.0042	10.9315	9.61102	10.0334	9.66534	10.5206	10.0688	10.2621	10.4878	9.69697	9.94544	9.88111	9.40727	10.7499	10.6284	9.60177	10.3805	10.6284	10.6092	10.7632	10.1319	9.85953	10.3729	9.30834	9.21917	10.4909	9.26913	10.2432	11.0641	10.4858	9.99859	9.47978	10.3399	10.6865	9.35535	10.4481	10.2131	10.5906	9.57932	9.47168	9.58308	10.3083	9.69697	8.83289	9.8857
D25217_at	9.64205	9.29002	8.50383	8.90388	8.61471	6.64386	9.72451	8.94251	6.64386	8.96867	6.64386	6.64386	7.62936	7.84549	8.93369	8.35755	8.04985	9.88874	9.48784	8.27612	8.36194	9.75656	10.2408	9.43879	10.196	9.31288	9.81218	10.5613	8.64386	8.85175	9.45533	9.3837	10.3332	8.71081	8.16993	8.76818	9.52356	8.32193	10.4605	6.64386	9.51175	9.30834	8.26209	8.04985	7.84549	8.07682	7.74147	9.20945	9.68299
D25218_at	8.36632	6.64386	7.24793	8.80413	8.81057	9.04166	9.07146	8.07146	8.61102	8.82337	8.90388	8.53528	8.51964	8.633	7.97154	9.51373	8.14466	9.03342	7.31288	7.19967	7.72792	8.78463	7.42626	8.25739	7.96578	7.62936	8.2854	8.65821	7.06609	8.633	8.2384	9.20457	8.65464	8.7039	8.35315	7.90087	7.40088	9.2738	9.32867	8.61471	8.29921	7.84549	9.20212	8.57365	7.56224	8.12928	7.82655	9.22641	9.2384
D25248_at	8.91289	8.16993	7.88264	7.42626	8.36632	9.54882	7.08746	7.50779	7.71425	7.72792	6.64386	6.64386	8.15482	8.72451	7.79442	8.35755	7.89482	8.72792	7.66534	7.83289	7.67948	8.87036	8.07146	8.12412	8.7039	8.17991	9.35535	8.05528	7.62205	8.04985	6.67243	8.97154	9.36851	8.37938	8.84549	8.15482	8.94251	8.55075	8.11894	7.85175	8.83605	8.33539	8.27146	8.29921	8.20945	6.76818	8.07682	8.11374	7.88264
D25274_at	8.33539	8.66534	8.81378	10.5421	10.6018	8.76155	10.5333	9.51767	9.90689	9.94691	7.69349	7.7211	8.84549	10.3061	10.5953	9.33985	9.77643	9.22641	8.17991	8.27612	9.74819	10.4512	9.69697	9.54882	11.9304	7.93664	9.0954	8.76155	9.91289	9.24079	8.9571	10.8688	6.64386	9.32418	10.1649	8.98584	9.96867	10.3576	10.5868	9.28077	9.70563	8.74147	10.8925	8.09803	10.3309	8.73471	10.2866	9.12412	10.5555
D25278_at	9.3837	9.16993	8.54689	9.16239	9.07146	9.21432	8.55842	8.08215	7.48382	8.71081	8.64024	6.75489	8.29002	8.77479	8.73132	8.68299	8.43463	8.62205	8.73809	6.9542	8.32643	9.16239	8.8009	8.52748	7.88264	8.14975	8.87344	6.94251	8.98014	8.26679	8.15987	9.03892	10.3542	9.10591	8.87344	8.32643	9.23122	9.06878	8.62571	7.7211	9.35094	9.00562	8.75154	8.90388	8.09803	7.12928	9.16239	8.55075	8.37069
D25303_at	7.49985	8.9629	7.3837	8.20945	6.64386	8.58496	6.64386	7.7879	6.64386	6.64386	6.64386	6.64386	7.96578	7.44294	7.49185	7.83289	7.76818	6.64386	6.64386	6.64386	6.64386	8.48784	6.64386	7.88264	6.64386	6.64386	8.62571	8.29462	8.83605	7.94837	6.89482	8.32643	6.64386	6.64386	7.04439	7.70736	6.64386	7.69349	7.06609	6.64386	6.64386	7.96578	8.68299	6.64386	8.12928	7.91886	6.64386	7.7879	8.27612
D25328_at	6.64386	9.39017	6.64386	7.50779	6.64386	6.64386	9.16491	6.64386	6.64386	6.70044	7.29462	6.64386	6.64386	7.57743	10.0661	8.72451	6.64386	8.36194	6.64386	7.91289	7.22882	6.64386	6.64386	7.16993	9.3015	6.64386	6.64386	6.64386	7.82655	7.77479	6.64386	6.72792	9.21917	6.64386	6.64386	8.55842	7.25739	7.80735	10.7432	7.56986	7.52356	6.64386	10.1948	6.64386	9.35535	6.64386	7.56224	9.84549	9.03617
D25538_at	6.64386	7.44294	7.70044	7.74147	8.71768	7.2384	8.81378	7.91886	6.64386	7.29462	8.30378	7.08746	7.14975	6.65821	9.90539	8.96	8.13955	7.21917	7.87036	8.09803	7.88874	8.15482	7.16993	7.21917	7.7879	6.64386	8.10329	6.64386	6.64386	6.64386	7.3837	9.39874	10.3718	10.1215	6.64386	7.94837	7.89482	7.32193	8.47168	6.64386	8.65464	6.64386	8.11374	6.96578	7.40088	7.14975	8.75822	9.72962	8.21432
D25539_at	6.64386	6.64386	6.64386	6.64386	6.64386	7.49185	6.64386	8.36194	6.64386	6.75489	6.64386	6.64386	6.64386	6.64386	6.64386	6.64386	7.56224	6.76818	7.18982	7.8009	7.82655	8.3443	8.96	6.64386	8.77479	6.64386	9.02791	6.70044	6.64386	8.30378	6.64386	6.64386	7.43463	8.53138	9.01959	6.64386	7.16993	8.8392	6.64386	8.12412	7.96578	6.64386	6.64386	6.64386	6.98868	6.64386	6.64386	6.64386	6.64386
D25547_at	9.29232	9.02791	9.28077	8.40939	9.66534	9.98014	6.64386	8.83289	6.64386	8.53138	6.64386	6.64386	8.43879	8.01123	9.02791	8.46761	9.07682	8.3837	7.98868	7.14975	9.61102	9.43671	8.88264	9.31967	9.18982	6.64386	9.02791	7.6865	8.91588	8.19967	7.88264	7.62205	9.47168	9.70736	9.63844	9.58496	10.0458	8.98014	9.18982	8.61102	9.53528	9.41996	9.40514	8.73471	9.80252	8.28077	8.94837	9.49185	8.98299
D26018_at	6.64386	6.64386	6.64386	6.71425	7.85175	6.64386	8.36632	6.64386	6.64386	6.64386	6.64386	6.64386	6.64386	6.64386	8.14466	6.64386	6.64386	6.67243	6.64386	6.64386	6.64386	6.64386	6.64386	6.64386	8.32643	6.64386	6.64386	6.64386	6.64386	6.64386	6.64386	6.64386	7.29462	6.64386	6.64386	6.64386	6.64386	6.64386	7.82018	7.30378	6.64386	6.64386	6.64386	6.64386	6.64386	6.64386	7.60733	6.64386	7.85175
D26067_at	8.12928	7.42626	7.22882	8.17493	8.5812	8.36632	7.60733	7.94837	6.64386	6.64386	7.62205	6.93074	7.13955	7.27612	7.80735	8.35315	6.64386	7.63662	8.03342	6.64386	6.64386	9.11114	7.5157	6.64386	8.50779	7.61471	6.64386	6.6865	7.8009	7.01123	7.3837	8.17991	7.15987	6.64386	8.84862	7.41785	7.70044	7.91289	7.76818	7.2384	8.54303	7.33092	7.6865	7.45121	6.64386	7.20945	8.98868	7.69349	7.56986
D26068_at	11.6944	10.9293	12.3853	11.6248	11.9451	11.5892	11.4569	11.1867	11.3174	10.8933	10.8925	10.9285	12.1849	12.236	12.1646	12.0241	12.0014	11.268	11.1699	11.0768	10.5934	12.314	11.5068	11.9084	11.6008	10.5708	10.8948	10.8887	12.0196	11.2052	11.5333	11.7707	11.2603	11.1408	11.7121	11.9189	11.941	11.2426	11.8595	10.7682	11.5994	11.1402	12.3264	11.463	12.3775	11.0258	11.9542	11.5751	11.6266
D26069_at	7.65821	7.33985	7.36632	8.10329	9.36413	8.41363	7.43463	7.91886	7.3837	7.10852	6.64386	6.64386	7.87036	8.0607	7.87652	8.41363	7.49985	6.93074	8.56224	7.8009	7.14975	8.54303	8.01681	6.82018	8.40514	6.75489	8.11894	7.41785	7.88264	6.64386	6.64386	8.89785	8.59619	7.8392	8.20457	8.01123	8.2854	8.05528	7.85175	7.12928	8.01123	7.7211	8.75154	6.64386	7.87036	6.74147	9.37938	8.11894	8.49586
D26129_at	6.64386	6.64386	6.64386	6.64386	6.64386	6.64386	6.64386	6.64386	6.64386	6.64386	6.64386	6.64386	6.64386	7.34873	6.64386	6.64386	6.64386	6.64386	6.64386	6.64386	6.64386	6.64386	7.66534	6.64386	12.6793	6.64386	8.61471	6.64386	6.64386	6.64386	9.48985	6.64386	8.33092	6.64386	6.64386	6.64386	6.64386	6.64386	6.64386	7.58496	6.64386	6.64386	6.64386	6.64386	6.64386	6.64386	6.64386	6.64386	6.64386
D26135_at	6.64386	6.64386	6.64386	6.64386	6.64386	6.64386	6.64386	6.64386	6.64386	6.64386	6.64386	6.64386	6.64386	6.64386	6.64386	6.64386	6.64386	6.64386	6.64386	6.64386	6.64386	6.64386	6.64386	6.64386	6.64386	6.64386	6.64386	6.64386	6.64386	6.64386	6.64386	6.64386	6.64386	6.64386	6.64386	6.64386	6.64386	6.64386	6.64386	6.64386	6.64386	6.64386	6.64386	6.64386	6.64386	6.64386	6.64386	6.64386	6.64386
D26308_at	8.83289	9.00282	12.242	9.88417	10.3387	9.82018	9.40301	12.3625	8.59246	8.55459	9.45738	9.57175	9.2738	8.89785	10.137	9.92184	8.53138	9.93369	9.4818	9.68475	10.5934	10.0084	10.0821	9.86573	10.3912	9.08746	10.8494	9.43254	9.68124	8.96867	11.4651	11.3225	10.733	10.3587	9.68825	9.36632	10.1611	9.6865	9.66356	8.83289	10.1787	10.4305	9.89936	9.49386	8.54303	9.59991	9.66711	9.10329	8.40514
D26350_at	6.64386	6.64386	6.64386	6.64386	6.64386	6.64386	6.64386	6.64386	6.64386	6.64386	6.64386	6.64386	6.64386	6.64386	6.64386	6.64386	6.64386	6.64386	6.64386	6.64386	6.64386	6.64386	7.26679	6.64386	6.64386	6.64386	6.64386	6.64386	6.64386	6.64386	6.64386	6.64386	6.64386	6.64386	6.64386	6.64386	6.64386	6.64386	6.64386	6.64386	6.64386	6.64386	6.64386	6.64386	6.64386	6.64386	6.64386	6.64386	6.64386
D26361_at	7.49985	6.84549	7.6865	8.06609	7.76155	7.56986	7.93074	6.90689	7.66534	7.2854	6.98868	6.64386	6.64386	6.84549	7.05528	6.64386	6.64386	8.03342	6.64386	6.93074	6.64386	7.39232	6.97728	6.64386	7.46761	6.64386	6.64386	6.88264	7.89482	6.64386	7.06609	7.3837	6.85798	7.6865	6.64386	6.75489	7.67948	7.82018	7.67243	7.24793	7.29462	7.91886	7.22882	7.01123	7.94837	6.64386	8.13443	6.89482	7.56224
D26362_at	8.29002	9.18488	9.67596	9.26913	9.35315	9.91886	9.56224	8.54689	9.65105	9.0634	9.83763	8.46761	9.43045	9.0954	9.84235	9.36632	8.91289	8.90388	9.33539	9.18982	8.35315	10.0084	8.69349	9.62205	9.3837	8.76818	9.37504	9.04439	8.72792	8.46352	8.19476	9.68475	9.03067	9.40088	9.85175	9.50383	9.79116	9.21675	9.41363	9.68124	8.59246	10.1033	9.50184	8.60733	9.11634	8.97154	9.65105	10.0098	9.87498
D26443_at	6.64386	6.64386	6.64386	7.40939	6.64386	6.64386	6.64386	6.64386	6.64386	6.64386	6.64386	6.64386	6.64386	6.64386	6.64386	6.64386	6.64386	6.64386	6.64386	6.64386	6.64386	6.64386	6.64386	6.64386	7.45943	6.64386	6.64386	6.64386	6.64386	6.64386	6.64386	6.64386	7.97728	6.64386	6.64386	6.64386	6.64386	6.64386	6.64386	6.64386	6.64386	6.64386	6.64386	6.64386	6.64386	6.64386	6.64386	6.64386	6.64386
D26528_at	7.59246	7.42626	6.64386	7.56224	6.64386	6.80735	6.64386	6.64386	6.64386	7.52356	6.64386	7.15987	6.64386	6.64386	6.64386	6.64386	6.64386	6.74147	6.64386	7.06609	6.64386	7.78136	6.80735	7.89482	7.62205	6.64386	7.62205	6.70044	6.64386	7.45121	6.64386	7.26679	8.00562	7.93664	7.45121	7.14975	7.13955	6.72792	6.64386	7.26679	6.64386	7.82018	7.40088	6.65821	6.64386	6.64386	6.64386	7.04439	6.71425
D26561_cds1_at	6.64386	6.64386	6.64386	6.64386	6.64386	6.64386	6.64386	6.64386	6.64386	6.64386	6.64386	6.64386	6.64386	6.64386	6.64386	6.64386	6.64386	6.64386	6.64386	6.64386	6.64386	6.64386	6.64386	6.64386	6.64386	6.64386	6.64386	7.14975	6.64386	6.64386	6.64386	6.64386	6.64386	6.64386	6.64386	6.64386	6.64386	6.64386	6.64386	6.64386	6.64386	6.64386	6.64386	6.64386	6.64386	6.64386	6.64386	6.64386	6.64386
D26561_cds2_at	7.16993	6.64386	6.64386	6.97728	6.79442	6.64386	6.64386	6.64386	6.64386	6.64386	6.64386	6.64386	6.65821	6.79442	6.64386	6.64386	6.64386	6.64386	6.64386	6.64386	6.64386	6.64386	6.64386	6.64386	6.64386	6.64386	6.64386	6.64386	6.64386	7.48382	6.64386	6.64386	7.40939	6.64386	6.64386	6.64386	6.64386	6.64386	6.64386	6.64386	6.64386	6.64386	6.64386	6.64386	6.64386	6.64386	6.64386	6.74147	6.64386
D26561_cds3_at	6.64386	6.64386	6.64386	6.64386	6.64386	6.64386	6.64386	6.64386	6.64386	6.64386	6.64386	6.64386	6.64386	6.64386	6.64386	6.64386	6.64386	6.64386	7.16993	6.64386	6.64386	6.64386	6.64386	6.64386	6.70044	6.78136	6.64386	6.64386	6.64386	6.64386	6.64386	6.64386	6.64386	6.64386	6.64386	6.64386	6.64386	6.64386	6.64386	6.64386	6.64386	6.64386	6.64386	6.64386	6.64386	6.64386	6.64386	6.64386	6.64386
D26579_at	8.31288	8.55459	7.86419	8.36194	8.10852	8.31741	7.06609	6.64386	7.44294	8.59246	8.56224	6.75489	8.48382	8.25739	6.64386	9.30834	8.78136	6.80735	8.47168	8.59246	8.66888	9.17742	8.94837	10.151	7.57743	9.0607	8.35315	8.50779	8.91588	9.26913	8.01123	8.83605	10.0417	10.5177	7.86419	8.92481	7.87036	6.64386	7.72792	7.07682	7.11894	7.85798	8.44708	7.59246	7.31288	8.83289	9.05799	8.54689	8.82018
D26598_at	10.7846	10.7254	10.6944	11.2282	11.617	11.1668	10.9189	10.6073	11.4351	10.0485	10.6935	10.5196	9.72962	10.7465	11.2228	11.1561	10.5343	10.6812	10.3129	10.9965	11.6008	10.568	10.1649	10.2574	11.1046	9.92778	10.3923	10.6537	9.74147	10.4168	11.1586	11.374	10.6909	11.3387	10.2597	11.0934	11.3641	11.1144	11.1504	10.9218	10.5343	10.7398	11.5599	10.9809	11.1561	10.5088	11.3826	10.5915	11.5684
D26599_at	10.5859	10.858	10.0661	10.4615	11.528	11.1453	10.8626	10.2252	11.31	10.3597	10.207	10.2058	9.54303	9.96145	11.2095	10.2348	10.0967	10.5038	10.4828	9.93811	10.7838	10.4284	10.3696	10.4388	10.9586	9.86573	10.1749	10.2866	10.1599	10.5372	10.9491	11.163	10.0307	10.5108	10.7339	11.2726	12.1702	11.2264	11.3498	11.6684	10.9432	10.8234	12.2312	11.2198	11.8781	10.7649	10.4676	11.3191	11.3998
D26600_at	10.2336	9.89785	10.6239	10.218	10.9866	11.0987	10.6129	10.1228	10.4868	10.8074	9.98299	10.8376	9.99718	10.1636	11.4843	10.9622	9.71768	10.0126	9.83131	9.70736	10.5517	10.4346	10.444	10.6046	10.2467	9.5216	10.0875	9.3015	9.58684	9.95855	10.3185	11.1312	9.20457	9.98584	10.6856	11.2052	11.381	11.0782	11.4853	10.5353	10.6312	10.4179	11.7768	10.275	11.4984	10.4574	10.4727	11.1529	11.5579
D28114_at	9.46557	8.77808	7.58496	7.42626	8.34873	9.32643	6.97728	7.21917	7.83289	7.09803	7.01123	7.03342	7.76818	8.09803	7.33092	8.13443	7.69349	7.33985	7.7879	7.71425	7.42626	8.84235	7.98299	7.73471	8.02791	8.34873	8.84549	7.69349	8.3443	7.78136	6.64386	9.19967	9.24555	8.65464	8.73132	8.08215	9.00282	8.87036	8.17991	8.29462	8.84549	8.56605	8.93369	7.87036	8.43045	7.96578	7.6865	7.97154	7.97154
D28118_at	8.41785	8.9629	8.77479	6.79442	9.7879	8.61102	8.64024	7.76818	7.94251	6.64386	8.5157	7.94837	8.28077	8.65105	9.53528	9.03617	8.81698	8.27146	8.43045	7.24793	7.49985	10.0098	8.8009	8.37069	8.57365	6.64386	6.90689	7.41785	7.19967	7.57743	7.41785	8.24793	8.18982	8.71768	7.81378	8.93664	8.60733	8.59619	8.43879	7.76818	8.68299	7.87652	8.56605	7.6865	8.58496	7.55459	9.15228	8.6865	9.63662
D28124_at	9.19476	10.1344	9.30606	9.86109	9.69697	10.1649	9.0634	9.38802	8.97728	8	9.18735	8.34873	9.60363	8.76155	9.33762	8.37938	9.0954	9.19476	9.50779	9.45943	9.28771	9.29232	10.0154	9.88111	9.77149	8.60363	10.0741	9.79928	11.1	9.11374	8.44708	9.64386	10.0458	9.56796	10.1911	10.0741	10.3848	10.2969	9.45533	9.9901	9.90539	10.014	10.1687	9.11634	9.47371	9.59432	9.35094	9.47168	9.42836
D28137_at	8.56224	9.31741	9.23122	10.9009	10.8439	9.31741	9.24079	8.82655	8.87036	10.6952	10.1124	8.19476	9.08215	9.34651	10.585	10.5333	9.82972	9.37938	9.21432	9.71596	10.0362	6.64386	9.62571	9.74147	9.54882	9.08746	10.1787	8.34873	8.50779	9.03067	7.3837	10.6266	8.33092	9.77808	9.07146	9.15987	9.69697	9.58496	10.6528	7.85798	9.44915	9.25267	9.24079	8.7879	7.73471	7.67948	10.0084	8.59246	10.1383
D28364_at	6.90689	7.69349	7.70044	7.10852	7.35755	7.48382	7.03342	6.64386	6.64386	8	7.04439	6.64386	6.89482	6.91886	9.12928	8.58496	6.64386	6.64386	7.76818	6.64386	6.64386	8.02791	7.26679	6.64386	8.09803	6.64386	7.57743	6.64386	8.54689	8.14975	6.64386	8.2384	6.64386	8.40939	6.93074	7.21917	7.76155	7.80735	9.55267	7.44294	7.26679	6.64386	8.96	7.20945	6.67243	7.11894	6.76818	6.64386	7.72792
D28383_at	8.14975	6.64386	7.40939	7.29462	8.43045	6.64386	6.88264	6.64386	7.97728	6.83289	7.91886	6.89482	8.29002	7.92481	8.71425	8.66178	6.91886	7.33985	6.64386	6.64386	6.64386	7.78136	7.56224	8.88874	8.00562	6.64386	6.64386	6.64386	7.08746	6.64386	6.64386	7.45121	6.64386	6.98868	8.03892	8.87344	9.2384	7.58496	9.35315	7.03342	7.92481	6.64386	9.0607	7.58496	8.633	6.89482	7.36632	8.30378	8.5157
D28416_at	10.6546	10.5718	10.744	10.545	10.774	11.1674	10.2348	10.6221	11.1098	10.3015	10.5736	9.83605	10.1306	10.3977	11.8186	11.0987	10.0417	9.93369	10.6519	10.014	9.1267	10.7004	10.8811	10.8321	10.1396	9.37938	9.76155	8.35755	10.5915	10.268	10.0471	10.1636	11.1183	10.2396	11.1892	10.9418	11.7048	11.1248	11.0307	11.0196	11.183	10.6266	11.5517	10.4315	10.9578	10.2877	10.6036	10.3197	10.8849
D28423_at	11.3304	8.64746	11.6658	10.352	11.3146	10.3923	10.6591	10.2761	11.5008	11.4299	11.7469	10.1674	10.5708	10.4398	11.6604	12.2641	10.6018	9.70217	9.79766	10.1163	6.64386	9.98726	9.56224	9.93369	10.1699	9.2503	8.92184	8.54689	10.0661	9.00562	10.8337	9.3837	6.64386	8.75822	10.6795	11.1189	11.7834	10.6119	11.9582	10.8918	10.584	10.0334	12.0413	11.0881	10.6312	10.5392	10.7549	10.2912	11.5353
D28476_at	8.89178	9.11114	9.72622	9.76321	11.0802	9.48382	8.01123	9.22882	8.92778	8.91289	8.88264	8.57743	8.85487	9.20212	10.4635	9.95128	9.56605	8.37504	9	8.93074	8.58871	9.86573	9.53528	9.52356	10.4231	8.7211	7.73471	8.69	9.42417	8.18982	7.63662	9.98868	10.5546	9.50978	9.67066	9.82337	9.97585	9.56796	10.1254	8.65464	9.73132	10.0348	9.94837	8.58871	9.15228	8.45121	9.76818	9.52356	9.64926
D28483_at	7.65821	6.64386	7.74819	6.94251	7.47573	9.12412	6.64386	6.64386	6.64386	6.75489	7.2384	6.64386	7.46761	8.00562	6.64386	7.2384	7.75489	7.06609	7.76818	7.33985	6.64386	8.77479	8.42206	6.64386	8.67596	6.75489	8.06609	6.65821	6.96578	7.20945	6.64386	7.45943	8.40088	7.17991	8.49586	8.59619	8.76155	7.61471	7.33092	7.34873	8.04985	8.40939	8.47168	7.29462	8.33985	7.45943	7.05528	7.12928	6.64386
D28532_at	6.88264	8.17493	7	7.8392	6.96578	7.01123	6.64386	6.64386	6.64386	6.64386	6.64386	6.64386	6.64386	7.3837	6.64386	8.0607	6.64386	6.64386	7.05528	6.64386	7.24793	7.91886	8.45533	7.32193	6.64386	6.64386	8.93074	7.79442	6.98868	7.62205	6.64386	8.19967	8.92184	7.97728	8.45943	6.67243	7.90689	6.80735	6.98868	7.46761	6.64386	7.33092	6.64386	6.64386	7.53138	6.82018	6.91886	7.86419	7.17991
D28588_at	8.52748	8.10852	8.77479	8.3837	8.55842	8.9571	8.25739	7.46761	6.67243	6.64386	7.91886	6.64386	8.13955	8.3966	8.51175	8.65105	8.64024	7.98868	8.45943	8.01681	6.64386	9.45327	8.3966	8.68299	8.89785	7.96	6.97728	7.76818	8.76487	7.97728	7.26679	8.69	9.00843	8.34873	8.73809	8.44708	9.13699	8.21917	8.45943	7.79442	8.91588	8.20945	8.98299	8.24317	8.55075	6.64386	9.25267	8.53138	8.41785
D28589_at	6.64386	8.21917	7.62205	8.52748	8.97728	6.64386	9.24079	6.64386	7.32193	6.64386	9.05528	8.86109	8.06609	8.81698	10.007	9.50383	6.64386	9.14466	7.82018	6.89482	6.64386	7.31288	8.23362	7.69349	8.02791	6.64386	6.64386	8.2854	6.64386	6.64386	9.30834	8.50383	6.64386	6.64386	8.90989	6.64386	8.79116	9.01123	10.1137	8.11374	7.75489	6.64386	10.1762	7.64386	9.32867	8.82972	9.33985	8.90087	9.08746
D28915_at	8.74483	8.79766	8.51175	10.1472	9.11114	9.23122	7.6865	8.07146	7.49185	7.56224	8.94251	7.41785	9.37504	8.81057	8.52748	9.90689	9.92778	7.85798	8.52356	8.57365	7.19967	9.57365	8.3443	8.24317	7.82655	7.61471	9.25739	8.05528	8.93958	8.3837	8.58496	9.27146	10.1699	9.81538	8.93958	9.68124	10.1007	8.37504	8.18982	8.25267	8.89178	8.6865	9.26444	8.67948	8.77149	7.72792	8.64024	8.3837	7.88874
D29012_at	11.178	11.3454	10.4388	10.2021	11.7474	11.0721	10.4727	10.7649	11.0674	10.1319	10.9766	10.6926	10.6366	10.1228	11.2324	11.3896	10.5008	10.7855	10.3663	11.1624	10.2456	11.0553	10.5999	10.9723	10.7406	10.0728	10.3685	10.2819	10.3219	10.5765	10.3332	10.9031	10.242	10.3432	10.9248	10.6421	11.4702	11.1674	10.7863	11.1163	11.1978	11.0112	11.2715	10.6027	10.6348	10.7381	10.7936	10.6221	10.6944
D29013_at	9.57932	8.9629	8.38802	8.633	9.56986	9.49185	8.45121	8.33092	8.95128	8.7039	8.76155	8.61471	9.02514	9.04166	8.87652	9.79442	8.77149	8.31741	8.90087	8.59991	7.86419	9.73978	8.49985	8.77479	9.18982	7.97154	9.24079	7.97728	9.13186	8.59991	8.3837	9.59619	10.0307	8.65464	9.14466	9.03342	9.41363	9.1267	8.41785	8.44294	9.26209	10.1124	9.46557	8.8857	8.80413	7.93664	9.43671	8.64746	8.7211
D29641_at	6.64386	7.18982	6.6865	8.05528	8.27612	6.64386	7.91886	7.40939	6.98868	6.64386	7.49185	6.80735	6.64386	6.64386	8.7211	7.90087	6.64386	6.83289	7.42626	6.79442	6.64386	7.05528	6.64386	7.05528	8.02791	7.03342	8.17991	7.93664	6.64386	6.64386	7.76155	7.54689	7.36632	7.11894	7.98299	6.80735	7.88874	7.26679	8.29462	7.12928	7.44294	7.70044	7.72792	6.64386	7.52356	6.64386	7.75489	8.27146	8.16491
D29642_at	8.25739	7.93664	6.64386	9.12412	8.85175	6.64386	10.3826	6.64386	8.83289	9.16742	8.11374	7.69349	8.29002	6.74147	10.058	9.04166	8.87652	7.42626	8.25739	8.45121	6.64386	8.44708	9.10066	10.4502	9.61102	8.31288	8.59246	9.13186	6.64386	6.64386	6.64386	9.05799	9.27612	9.35975	8.77479	9.36194	8.07146	9.65642	9.68475	7.30378	8.86728	7.96578	8.75154	6.64386	7.44294	7.17991	8.3837	9.04712	10.3945
D29643_at	9.50383	9.21432	9.56986	10.1898	10.3015	10.032	9.81378	8.36194	9.97441	10.0861	9.84862	9.33985	9.29692	9.66711	10.545	10.098	9.86419	9.32418	9.59246	9.42626	9.59805	10.2633	10.3826	11.1325	11.2432	10.6018	9.80735	11.2644	11.224	10.2668	10.7142	10.7271	8.81378	9.56796	9.30606	9.9629	9.80574	9.85798	10.7013	9.57365	9.79279	8.84862	10.9513	9.52552	10.3354	9.59432	10.3287	10.1137	10.4398
D29677_at	7.39232	8.51964	7.25739	7.94837	9.67772	6.64386	8.29002	6.71425	7.33092	6.64386	7.86419	6.64386	7.65821	8.23362	8.21432	8.39232	7.20945	6.64386	6.64386	6.64386	6.64386	6.85798	7.16993	8.06609	7.27612	6.64386	6.64386	6.64386	6.64386	6.64386	6.64386	7.2854	8.04985	8.31741	6.65821	8.90388	7.17991	7.40088	8.40939	7.82655	6.64386	6.78136	6.64386	6.64386	8.73809	6.64386	8.99152	9.81218	9.00562
D29810_at	6.64386	6.64386	6.64386	6.64386	6.64386	7.20945	6.64386	6.64386	6.64386	6.64386	6.64386	6.64386	6.64386	6.64386	6.64386	6.64386	6.64386	6.64386	6.64386	6.64386	6.64386	6.64386	6.64386	6.64386	6.64386	6.64386	7.73471	6.64386	6.64386	6.64386	6.64386	6.91886	6.64386	6.64386	6.64386	6.64386	6.64386	6.64386	6.64386	6.64386	6.64386	6.64386	6.64386	6.64386	6.64386	6.64386	6.64386	6.64386	6.64386
D29833_at	6.64386	6.83289	6.64386	6.64386	6.64386	6.93074	6.64386	6.64386	6.64386	6.64386	6.64386	6.64386	6.64386	6.64386	6.64386	6.64386	6.64386	6.64386	6.64386	6.64386	6.64386	6.64386	6.64386	6.64386	6.64386	6.64386	6.64386	6.64386	6.64386	6.64386	6.64386	6.64386	6.64386	6.64386	6.64386	6.64386	6.64386	6.64386	6.64386	6.64386	6.64386	6.64386	6.64386	6.64386	6.64386	6.64386	6.64386	6.64386	6.64386
D29954_at	10.1408	10.4988	9.85175	9.40088	10.4126	11.1163	9.99435	9.10329	9.72622	10.0471	8.06609	9.46761	9.36851	9.63844	9.96434	9.77149	9.21675	9.97441	10.4491	9.45943	9.57365	10.5868	10.2021	10.3761	10.2515	9.55842	10.3729	9.96434	10.1997	10.0056	9.05528	10.6348	11.0272	10.1331	10.2276	9.96867	10.7797	10.4491	9.73978	10.2586	10.2204	11.0654	10.4157	9.92035	9.84235	9.85331	10.1497	9.94983	9.88417
D29956_at	7.21917	7.59246	6.64386	7.87652	8.19967	8.03342	6.97728	7.09803	6.67243	6.64386	6.64386	6.64386	6.64386	7.31288	7.64386	7.08746	7.3837	6.64386	7.59246	6.64386	6.64386	8.21917	6.80735	8.01681	7.80735	6.82018	6.75489	6.64386	6.94251	7.2854	6.64386	7.70044	7.77479	7.45943	7.27612	7.5157	6.64386	7.48382	7.14975	7.16993	7.11894	8.26679	6.64386	6.64386	6.64386	6.78136	6.64386	7.55459	7.19967
D29958_at	6.64386	6.64386	6.64386	6.64386	6.64386	6.64386	6.64386	6.64386	6.64386	6.64386	6.64386	6.64386	6.64386	6.64386	6.64386	7.54689	6.64386	6.64386	6.64386	6.64386	6.64386	6.64386	6.64386	6.64386	6.64386	6.64386	6.64386	6.64386	6.64386	6.64386	6.72792	6.64386	6.64386	6.64386	6.64386	6.64386	6.64386	6.64386	6.64386	6.64386	6.64386	6.64386	6.64386	6.64386	6.64386	6.64386	6.64386	7.65105	6.64386
D29963_at	10.2131	10.1737	9.35094	10.0954	9.85175	10.8688	9.27146	9.10852	8.96867	8.93664	8.63662	8.67596	9.5157	10.2204	9.67948	9.76155	9.82337	9.69349	10.0112	9.29232	10.5784	11.2009	10.4778	10.0941	10.5038	9.93369	10.1548	9.82177	10.6175	10.0768	9.37069	10.7599	11.0808	10.6768	9.91737	10.1824	10.5078	10.1923	9.75322	9.93074	9.98584	10.4909	10.23	9.51964	9.91439	9.41363	9.7879	9.90087	9.63481
D30036_at	9.02514	8.73471	7.91289	8.18982	8.27612	9.31967	7.03342	6.64386	8.50779	8.48382	8.64024	8.58871	7.9542	8.56224	8.7211	8.87958	8.07146	8.69349	8.55075	7.55459	6.64386	9.7879	9.2738	8.80735	9.03892	8.33092	9.00282	7.49185	8.76487	8.56605	6.67243	9.00843	8.88874	6.70044	9	8	9.53916	9.07948	8.54689	8.49185	8.70044	9.01681	9.1267	8.08215	8.64024	7.25739	8.84235	7.98868	8.32643
D30037_at	7.2854	6.64386	6.64386	6.64386	7.35755	6.64386	6.64386	6.64386	6.75489	6.64386	7.62205	6.6865	7.19967	6.64386	7.96578	8.10852	6.64386	6.64386	6.64386	6.64386	6.64386	7.21917	6.64386	6.64386	6.64386	6.64386	6.64386	6.64386	6.64386	6.64386	6.64386	6.64386	6.64386	6.64386	7.49985	6.64386	7.3837	7.16993	8.25739	6.64386	7.24793	6.85798	6.64386	6.64386	7.16993	6.64386	7.74147	7.08746	8.24317
D30655_at	12.5013	11.8242	12.115	12.0182	13.2378	11.1053	11.8102	11.5812	11.7826	12.5187	12.0165	12.0768	12.5321	12.2886	12.9471	12.8359	11.5527	11.1189	11.1389	11.1478	9.34651	12.2592	10.7928	11.1718	11.2288	11.5265	10.4888	10.7288	11.576	11.1261	10.9665	11.9447	12.2966	11.363	11.5627	12.7616	11.8684	11.8773	12.4853	11.464	12.1007	11.0464	12.2399	12.1699	10.813	10.9679	12.3691	11.9035	11.9723
D30742_at	8.8009	7.46761	7.45121	7.59246	7.8392	8.50383	7.5157	8.20457	6.97728	7.37504	7.06609	8.47978	7.7211	7.62936	7.85175	8.15482	7.91289	7.65821	7.62936	8.46352	6.64386	6.85798	6.64386	7.87652	6.64386	6.96578	6.79442	6.64386	7.65105	7.90087	6.64386	6.6865	6.64386	6.64386	7.88264	8.69	9.2384	9.36194	6.64386	9.12928	9.04985	8.05528	9.53333	6.64386	8.99718	7.15987	7.13955	8.69697	7.86419
D30755_at	6.90689	6.64386	8.18488	8.15482	8.18488	6.64386	8.14466	7.49185	8	7.40939	7.91886	7.76818	8.3443	8.57365	10.1824	9.97585	10.1886	6.64386	6.75489	6.64386	9.10066	8.32193	9.61839	10.2143	7.62205	7.33092	9.02791	6.64386	6.64386	8.33539	7.43463	8.94251	8.91289	9.5812	8.20457	8.77149	6.64386	6.64386	9.17243	6.64386	7.21917	6.64386	8.53528	6.64386	9.07682	6.64386	8.49586	8.85798	8.9571
D30756_at	7.19967	7.89482	7.36632	7.62205	7.33985	6.91886	6.70044	6.64386	6.64386	6.64386	6.64386	6.64386	7	6.64386	6.64386	7.33985	7.40939	7.31288	6.64386	6.64386	7.65821	6.64386	6.64386	6.93074	6.67243	7.13955	8.2854	6.64386	7.02237	6.80735	6.64386	7.98868	8.17991	8.19967	6.64386	7.62205	7.56224	7.08746	6.96578	6.90689	6.64386	6.64386	8.224	7.32193	6.64386	6.64386	6.64386	8.18982	6.64386
D30758_at	10.3554	10.1787	10.1548	10.1497	10.2538	10.7912	9.54689	9.94398	10.3106	9.7211	10.5058	10.1459	10.643	10.5088	10.7339	10.8948	10.6555	10.4231	10.9476	11.5661	10.8788	10.3794	10.1849	10.8001	11.2503	10.7607	10.352	10.668	11.3399	10.6466	10.1085	10.6357	12.25	11.332	10.7108	11.7271	11.7744	10.6502	10.1267	11.2837	10.3253	10.1267	11.6502	10.7313	10.5727	9.94251	10.6528	11.5304	9.87344
D31716_at	6.96578	8.24317	7.53138	7.08746	6.72792	8.27146	7.42626	6.64386	6.64386	6.64386	8.30834	7.20945	9	7.27612	10.1611	8.49985	6.64386	7.29462	6.82018	7.66534	6.80735	8.12412	6.88264	6.64386	7.44294	6.64386	6.64386	7.25739	9.224	7.01123	7.24793	7.45943	8.16491	6.64386	7.55459	7.61471	7.6865	7.49185	7.25739	6.64386	7.75489	8.27612	7.22882	7.47573	6.64386	7.04439	9.50581	6.93074	6.64386
D31762_at	6.64386	8.18982	6.64386	6.64386	8.69	8.42626	7.70044	6.64386	6.64386	7.16993	6.64386	6.6865	6.64386	7.50779	8.67596	6.80735	6.64386	6.64386	7.91886	7.59246	6.64386	7.86419	6.64386	6.64386	7.79442	7.70044	6.97728	6.64386	8.62936	6.64386	6.64386	8.39232	6.64386	6.64386	7.37504	6.64386	6.64386	7.2384	6.91886	6.64386	7.70044	8.35755	6.64386	6.64386	6.98868	6.64386	8.45121	6.78136	6.64386
D31763_at	6.64386	6.64386	6.64386	6.64386	8.224	6.64386	6.64386	6.87036	6.64386	6.64386	7.14975	6.64386	6.64386	6.97728	7.41785	7.64386	6.64386	6.64386	6.64386	6.83289	6.64386	6.64386	6.64386	6.64386	6.64386	6.64386	6.64386	7.25739	6.64386	6.64386	6.64386	6.64386	6.64386	6.64386	7.48382	6.64386	6.64386	6.64386	6.64386	6.64386	6.64386	6.64386	6.64386	6.64386	6.64386	6.64386	7.83289	7.53138	6.64386
D31764_at	9.00562	6.64386	6.64386	9.66356	6.64386	6.64386	8.74819	9.81858	6.64386	6.64386	6.64386	6.64386	6.64386	7.45121	8.02237	9.41785	8.74483	8.36194	7.73471	9.70217	6.64386	6.64386	6.64386	6.64386	8.18488	6.64386	6.64386	8.69	6.64386	6.64386	7.06609	6.64386	6.64386	7.37504	6.64386	6.64386	6.64386	6.64386	9.00282	6.64386	6.64386	6.64386	6.64386	6.64386	6.64386	6.64386	8.56605	6.64386	8.93958
D31765_at	10.1561	8.51964	9.66178	9.55459	8.99718	10.5651	8.82018	8.51175	8.76155	9.01959	8.97441	8.74819	9.22882	9.13186	9.29232	9.36632	8.97154	9.75322	8.98584	9.10591	9.07682	9.29232	9.66888	9.96	9.75322	9.30378	10.242	9.48382	9.8392	8.30834	7.13955	9.42206	9.78627	8.83289	9.46964	9.42417	10.3848	9.92778	9.1472	9.50184	9.9571	9.9571	9.88264	9.53138	9.33539	9.33539	8.61839	9.10066	8.98014
D31766_at	9.26444	7.24793	9.0634	8.93369	7.42626	9.55651	7.58496	8.30834	8.36632	6.64386	8.47573	7.11894	9.07948	9.25267	8.7211	9.01123	8.29002	8.35315	8.90087	8.91289	7.87036	8.98584	8.35315	8.87344	9.7211	9.01123	9.49185	9.17991	9.55842	8.2854	7.65821	9.00282	9.23122	9	9.35315	9.39874	9.74315	9.14211	8.3837	8.8857	8.98014	9.08746	9.5812	9.46761	8.17493	7.04439	8.87036	8.75154	7.89482
D31767_at	11.0161	10.8994	11.6303	11.178	12.0192	11.1611	11.1787	10.8154	11.3015	10.5304	10.796	10.3772	11.8186	11.905	11.7423	12.4383	12.5517	10.8074	10.7928	11.2556	11.9304	12.6746	11.9897	12.1225	11.7356	10.3663	10.5372	11.3072	11.5565	11.7364	11.4336	12.2894	11.8265	12.1059	11.6375	11.8478	12.0324	11.2906	11.5836	10.7969	11.4315	11.3971	12.0515	10.8665	12.0369	10.93	11.9567	11.5661	11.6773
D31784_at	6.75489	6.64386	6.64386	6.64386	6.64386	6.64386	6.64386	6.64386	6.64386	6.64386	6.64386	6.64386	6.64386	6.64386	6.64386	6.64386	6.64386	6.64386	6.64386	6.64386	6.64386	6.89482	6.64386	6.64386	6.64386	6.64386	6.64386	6.64386	6.64386	6.64386	6.64386	7.04439	6.9542	6.64386	7.11894	6.64386	7	6.64386	6.64386	6.64386	6.67243	6.64386	6.64386	6.64386	6.64386	6.64386	6.64386	6.64386	6.64386
D31797_at	8.75489	7.19967	6.64386	7.8392	8.27146	9.54882	7.36632	7.11894	7.7211	7.04439	7.75489	7.43463	8.25267	8.23362	7.73471	8.33539	6.64386	8.13955	8.94837	7.14975	6.64386	8.69349	8.08215	8.12412	8.08746	7.21917	8.27146	7.91886	8.93958	7.16993	8.08215	8.50779	8.66534	7.27612	8.98868	8.31288	10.0901	8.42626	7.55459	7.96578	8.48784	9.00562	8.77149	8.73132	7.62205	7.48382	8.32193	8.9571	7.74819
D31815_at	6.64386	6.64386	6.64386	6.64386	6.64386	6.64386	6.64386	6.64386	6.64386	6.64386	6.64386	6.64386	6.64386	6.64386	6.64386	6.64386	6.64386	6.64386	6.64386	6.64386	6.64386	6.64386	6.64386	6.64386	6.64386	6.64386	6.64386	6.64386	6.64386	6.64386	6.64386	6.64386	6.64386	6.64386	6.64386	6.64386	6.64386	6.64386	6.64386	6.64386	6.64386	6.64386	6.64386	6.64386	6.64386	6.64386	6.64386	6.64386	6.64386
D31846_at	10.5699	10.3454	10.3465	10.4584	10.5137	11.4676	10.2107	10.1687	9.72281	10.8001	9.91886	10.5294	10.7322	9.96145	10.7797	10.0821	9.85019	10.268	10.5689	10.4115	10.7415	10.9773	10.8297	11.1555	11.0327	10.5362	10.7903	10.4083	10.8956	10.7237	9.84392	11.4858	11.0681	10.7723	11.0084	10.6475	10.9873	11.2204	9.79766	11.0587	11.4305	11.2306	11.1261	10.643	10.683	10.4898	10.1007	10.6795	10.352
D31883_at	7.45943	10.3565	9.24079	9.77149	9.82655	9.67243	8.76487	9.90839	8.31288	9.56796	8.72792	9.16742	10.817	9.10329	6.64386	10.0458	11.576	6.64386	8.7211	8.56224	10.043	8.29002	6.64386	7.20945	9.15482	8.92778	7.69349	9.75989	9.38154	8.31288	10.3015	8.24793	8.85487	10.3891	8.79442	10.0835	10.6751	8.24793	9.41151	10.2216	6.90689	7.8009	12.0251	9.58684	10.0014	9.7039	9.81378	9.97154	9.94691
D31884_at	10.2597	9.99859	9.90087	9.25974	9.21675	9.80252	9.11634	9.39874	9.44294	9.5812	9.44708	8.90388	9.91886	10.4273	8.72792	9.47776	10.275	8.66534	9.50779	8.95128	9.40727	10.2527	10.032	10.3151	9.82018	8.84235	9.81218	9.37504	10.4858	9.73132	9.75154	9.19476	9.75489	8.96578	9.48382	10.9211	9.60733	9.35094	8.91886	9.52356	9.83289	9.38154	10.3049	9.64386	10.2444	9.79604	9.37287	9.23601	8.29462
D31885_at	8.86109	8.43463	10.5803	10.5177	11.0231	8.84862	10.7339	10.6636	10.7903	10.1874	9.02514	9.50581	9.25974	10.0993	10.2491	9.99577	8.90388	9.30834	10.1972	9.60733	8.57365	9.23601	9.15735	9.96145	10.5421	9.46148	7.79442	9.73302	9.32867	9.24317	9.52748	9.57554	8.25739	9.83763	9.15228	9.37287	9.22641	10.2796	10.5651	8.20457	9.33539	8.82655	10.0566	9.79442	9.48583	7.98868	11.0512	9.44708	10.5304
D31886_at	6.64386	6.64386	6.64386	6.64386	8.01681	6.64386	6.64386	6.64386	6.64386	6.64386	6.64386	6.64386	6.64386	6.64386	6.64386	7.69349	6.64386	6.64386	6.64386	6.64386	6.64386	6.64386	6.64386	6.64386	6.64386	6.64386	6.64386	6.64386	6.64386	6.64386	6.64386	6.64386	6.64386	6.64386	6.64386	6.64386	6.64386	6.64386	6.64386	6.64386	6.64386	6.64386	6.64386	6.64386	6.64386	6.64386	8.75154	6.64386	6.64386
D31887_at	8.10329	8.81378	7.62205	7.12928	7.13955	9.0634	6.64386	8.04439	6.64386	6.94251	8.21917	6.64386	6.64386	7.27612	7.2384	7.90087	6.64386	7.42626	7.35755	6.76818	6.64386	6.64386	6.64386	7.66534	8.18488	7.65821	6.64386	7.59246	6.64386	7.41785	6.64386	6.64386	6.64386	6.64386	7.2384	7.20945	6.84549	7.76818	7.89482	7.63662	8.07682	7.59991	8.14466	6.75489	6.64386	7.01123	7.85175	7.73471	6.67243
D31888_at	8.18982	6.64386	7.94837	7.80735	9.52552	7.25739	8.64024	8.05528	8.02237	6.71425	7.53916	6.64386	7.25739	8.76155	8.94251	8.33539	7.70044	6.80735	7.6865	6.89482	6.64386	10.0674	7.7879	8.26209	9	7.31288	6.64386	8.55075	7.2854	7.87652	7.26679	9.03067	8.7211	8.13955	7.90087	8.6865	7.76818	8.07146	8.26209	7.40939	7.67243	8.17493	8.11894	6.64386	8.57365	6.64386	9.70044	7.61471	9.05257
D31890_at	10.0224	10.446	10.2033	10.3487	10.769	10.7748	10.5206	9.69523	10.3185	10.5421	10.2691	10.3652	10.5255	10.1687	11.2894	10.8564	10.3117	9.93369	9.64926	9.05799	10.7117	10.3998	10.021	10.2633	10.5784	9.40088	9.84706	9.60918	9.63118	10.2276	10.403	10.7993	10.196	10.3891	9.35094	11.4268	10.4594	10.8025	11.1787	10.7048	9.91289	10.7993	11.1861	10.6055	11.2288	10.2819	10.2715	11.2912	11.1196
D31891_at	9.71768	9.82337	8.02791	9.49586	10.0444	9.87805	9.58308	7.97728	9.3837	9.05528	9.11374	8.87652	8.67948	8.27146	9.64746	9.11634	8.56986	9.2384	9.82655	8.97441	8.40514	9.54303	7.96	9.85953	10.5038	9.49785	9.5216	9.42836	9.00843	8.53138	6.64386	10.5018	11.3117	10.4878	9.77149	9.10591	9.94544	10.3805	9.95274	9.25974	10.1293	10.2432	9.72451	8.85175	8.92778	8.40514	9.68299	10.29	10.2276
D31897_at	6.64386	7.62205	6.85798	6.64386	7.64386	7.66534	6.64386	7.36632	7.59991	7.14975	6.64386	6.94251	7.44294	6.64386	7.57743	6.64386	7.88874	6.64386	6.91886	6.64386	6.91886	6.64386	6.64386	8.04985	6.64386	7.64386	6.64386	6.64386	7.58496	7.98299	6.64386	7.56986	6.64386	7.45943	6.64386	8.30378	6.64386	8.47168	6.64386	6.64386	6.64386	7.85798	6.85798	8.01123	6.64386	8.21917	7.36632	7.20945	7.06609
D32001_at	10.0755	9.59059	9.58871	9.20457	9.64386	10.8525	8.89785	8.93664	7.81378	8.41363	8.29002	8.48382	9.49785	9.71253	8.73809	8.95128	8.58496	9.07948	9.13699	9.01681	8.47573	9.85019	9.75822	9.89633	9.92035	9.21675	10.5469	8.92481	10.0835	9.2503	6.64386	10.1497	10.7985	9.19967	10.0098	9.62022	10.3912	9.38586	9.20701	9.89026	9.57175	9.19722	9.41785	9.69697	8.67948	8.62936	9.44708	9.68124	8.67948
D32050_at	9.92926	10.0782	8.47573	10.314	10.4305	10.2842	10.1033	9.86419	10.0251	9.97441	9.36413	8.36194	9.31061	8.9571	9.93517	10.1072	7.78136	10.1098	10.0715	9.62571	9.04712	9.36851	8.98868	9.31288	10.0914	9.59246	9.01123	8.54689	8.70736	8.53138	8.29921	10.8811	10.7936	9.28771	10.5793	9.06609	10.5324	10.4828	10.5304	9.49785	10.0539	9.92778	10.8353	9.76155	8.96867	8.40514	10.3848	9.78953	10.6193
D32202_at	8.20945	7.77479	7.45121	7.92481	8.53138	9.22641	7.56224	6.6865	6.64386	7.34873	6.64386	8.07146	6.64386	7.34873	6.94251	6.64386	7.08746	7.76155	7.70044	6.64386	6.64386	8.55842	6.90689	7.82018	8.46352	7.82018	8.47168	6.84549	8.40939	7.59991	6.64386	8.37504	8.6865	7.29462	8.37069	6.64386	8.99152	8.49586	7.90087	7.73471	7.94837	7.74819	8.71425	6.64386	7.45121	6.64386	7.7211	7.70736	6.64386
D37931_at	8.30378	7.67243	7.7211	6.97728	7.76155	8.42626	7.40088	6.64386	6.64386	6.64386	7.3837	6.64386	6.80735	8.07682	7.49985	7.47573	6.64386	7.16993	7.90087	7.11894	6.96578	7.94251	7.86419	7.45121	8.61102	7.56986	8.60363	7.13955	8.09276	6.64386	6.64386	7.54689	9.06609	7.73471	7.86419	7.56986	8.40514	8.11374	7.85175	6.97728	7.78136	8	8.19476	6.82018	7.05528	6.64386	7.20945	7.92481	7.19967
D37965_at	6.64386	6.64386	6.64386	6.64386	6.64386	6.64386	6.64386	6.64386	6.64386	6.64386	6.64386	6.64386	6.64386	6.64386	6.64386	6.64386	6.64386	6.64386	6.64386	6.64386	6.64386	6.64386	6.64386	6.64386	6.64386	6.64386	6.64386	6.64386	6.64386	6.64386	6.64386	6.64386	6.64386	6.64386	6.64386	6.64386	6.64386	6.76818	6.64386	6.64386	6.64386	6.64386	6.64386	6.64386	6.64386	6.64386	6.64386	6.64386	6.64386
D38037_at	6.64386	8.45943	8.05528	6.64386	6.64386	8.44708	6.64386	6.64386	6.64386	6.64386	6.64386	6.64386	7.90087	6.64386	7.81378	6.64386	7.78136	7.21917	6.64386	6.65821	6.64386	9.18488	8.12412	8.633	6.64386	6.64386	6.64386	6.64386	6.64386	6.64386	6.64386	6.64386	6.64386	8.93074	6.64386	8.3966	6.64386	6.64386	7.02237	7.87036	9.08746	8.16491	6.64386	6.64386	7.45121	6.64386	6.64386	7.41785	7.37504
D38047_at	10.7347	10.697	11.021	10.2562	11.3652	10.9801	10.8903	10.668	11.2324	10.7364	10.888	10.6193	10.5127	10.5689	11.6524	11.2796	10.8994	10.4747	10.2586	10.1749	11.2935	11.0464	10.825	11.2408	10.3576	9.98584	10.1267	9.21189	10.4727	10.4429	10.7936	11.1196	10.6156	10.545	11.0437	11.5294	12.1238	11.3723	11.5058	11.2461	11.2808	10.6698	12.0705	11.0382	11.4717	11.0098	10.8146	11.1163	11.2662
D38048_at	9.24793	9.71939	9.93664	10.115	11.0272	10.1536	10.2935	9.76487	10.4605	9.58871	9.54303	9.64746	9.72962	9.65284	10.8757	10.0498	10.3049	9.77479	7.64386	9.59805	10.42	10.0875	9.44087	10.1189	10.2082	9.41363	8.44708	10.421	9.20701	9.66356	10.3696	10.2923	9.52552	9.82655	10.0403	10.6393	10.6493	10.1098	10.5727	9.81538	9.81378	9.17493	11.0647	10.5343	10.9307	9.79928	10.3998	10.014	10.3542
D38076_at	9.98442	9.73471	10.1573	10.1997	10.1163	10.599	10.7271	9.5411	11.128	10.1812	10.0901	9.32643	9.40727	8.93958	10.3399	9.7879	9.18735	10.6211	9.8392	9.88111	8.79116	10.0553	9.39017	9.67243	10.8431	9.55842	10.0279	9.68124	10.2396	9.92184	10.7507	9.9263	9.38586	8.58496	10.3208	10.5488	11.2015	10.3163	10.7607	10.3707	10.4051	10.1497	11.3896	11.0042	9.97441	10.3934	10.1649	10.3783	10.8122
D38128_at	6.64386	6.64386	6.64386	6.64386	6.64386	6.64386	6.64386	6.64386	6.64386	6.64386	6.64386	6.64386	6.64386	6.64386	6.64386	6.64386	6.64386	6.64386	6.64386	6.64386	6.64386	6.64386	6.64386	6.64386	6.64386	6.64386	6.64386	6.64386	6.64386	6.64386	6.64386	10.1189	6.64386	6.64386	6.64386	6.64386	6.64386	6.64386	6.64386	6.64386	6.64386	6.64386	6.64386	6.64386	6.64386	6.64386	6.64386	6.64386	6.64386
D38145_at	9.07146	8.55459	8.42626	7.87652	8.33985	9.17493	7.33985	7.54689	7.89482	8.23362	7.14975	7.54689	7.98299	8.31288	7.34873	7.92481	7.77479	7.85798	8.35315	7.36632	6.93074	8.90388	8.12412	8.52356	8.03892	8.31288	8.67243	7.50779	8.8009	7.85175	7.02237	8.36194	9.64205	8.71768	8.43463	8.53138	9.23601	8.64386	7.89482	8.07682	8.67243	8.65464	8.57743	8.71768	8.52356	7.91289	8.0607	8.27146	6.75489
D38293_at	6.64386	6.83289	6.64386	7.06609	8.57365	7.39232	7.01123	6.64386	6.91886	8.67243	6.64386	6.64386	7.11894	6.64386	7.47573	6.64386	6.64386	6.64386	6.64386	7.19967	7.70736	7.56986	7.18982	6.64386	6.64386	6.64386	6.64386	6.64386	6.64386	6.64386	6.64386	6.64386	6.64386	6.64386	6.64386	7.25739	7.59246	6.71425	6.64386	6.64386	6.64386	6.64386	6.64386	6.64386	6.64386	6.64386	8.67948	6.64386	6.64386
D38305_at	8.10329	6.64386	8.99435	6.64386	6.64386	8.85175	8.58871	7.62205	6.64386	6.64386	9.08746	10.4727	9.36632	9.61655	9.91886	9.59619	6.64386	6.64386	6.64386	6.64386	6.64386	6.64386	6.64386	6.64386	6.64386	6.64386	6.64386	6.64386	6.64386	9.43254	6.64386	8.85798	6.64386	10.1215	6.64386	8.58871	6.64386	6.64386	7.84549	6.64386	6.64386	6.64386	7.33092	6.64386	6.64386	9.25267	6.64386	6.64386	7.59246
D38449_at	6.64386	6.64386	6.64386	6.64386	6.64386	6.64386	6.64386	6.64386	6.64386	6.64386	6.64386	6.64386	6.64386	6.64386	6.64386	6.64386	6.64386	6.64386	6.64386	6.64386	6.64386	6.64386	6.64386	6.64386	8.15482	6.64386	7.08746	6.64386	6.65821	6.64386	6.64386	6.64386	6.64386	6.64386	6.64386	6.64386	6.64386	6.64386	6.64386	6.64386	6.64386	6.64386	6.64386	6.64386	6.64386	6.64386	6.64386	6.64386	6.64386
D38462_at	6.64386	6.64386	6.64386	6.64386	6.64386	6.64386	6.64386	6.64386	6.64386	6.64386	6.64386	6.64386	6.64386	6.64386	6.64386	6.64386	6.64386	6.64386	6.64386	6.64386	6.64386	6.64386	6.64386	6.64386	6.64386	6.64386	6.64386	6.64386	6.64386	6.64386	6.64386	6.64386	6.64386	6.64386	6.64386	6.64386	6.64386	6.64386	6.64386	6.64386	6.64386	6.64386	6.64386	6.64386	6.64386	6.64386	6.64386	6.64386	6.64386
D38491_at	7.39232	6.72792	6.76818	6.64386	7.56986	7.18982	6.64386	6.64386	6.80735	7.61471	6.84549	6.64386	7.27612	7.47573	7.55459	8.45121	7.45121	6.70044	6.64386	7.16993	6.64386	8.71081	6.97728	7.15987	6.64386	6.64386	7.40939	6.64386	8.17991	6.64386	6.64386	7.11894	7.33985	6.64386	6.64386	7.44294	8.01123	7.12928	7.58496	6.64386	6.64386	8.08215	8.09276	6.90689	6.9542	6.64386	6.93074	7.59246	7.2384
D38500_at	6.64386	7.57743	6.64386	6.64386	6.64386	6.64386	6.64386	6.64386	6.64386	6.64386	6.64386	6.64386	6.64386	6.64386	6.64386	6.64386	6.64386	6.64386	6.64386	6.64386	6.64386	6.64386	6.64386	6.64386	6.64386	6.64386	6.64386	6.64386	6.64386	6.64386	6.64386	6.64386	6.64386	6.64386	6.64386	6.64386	6.64386	6.64386	6.64386	6.64386	6.64386	6.64386	6.64386	6.64386	6.64386	6.64386	6.64386	6.64386	6.64386
D38503_at	6.64386	6.64386	6.64386	6.64386	6.64386	6.64386	6.64386	6.64386	6.64386	6.64386	6.64386	6.64386	6.64386	6.64386	6.64386	6.64386	6.64386	6.64386	6.64386	6.64386	6.64386	6.64386	6.64386	6.64386	6.64386	6.64386	6.64386	6.64386	6.64386	6.64386	6.64386	6.64386	6.64386	6.64386	6.64386	6.64386	6.64386	6.64386	6.64386	6.64386	6.64386	6.64386	6.64386	6.64386	6.64386	6.64386	6.64386	6.64386	6.64386
D38521_at	8.69697	7.72792	8.83605	7.98868	7.31288	7.98299	8.27146	8.61102	8.63662	8.61102	7.12928	7.82655	8.40939	9.2738	8.90087	9.20701	9.30378	7.77479	8.04985	6.98868	7.41785	10.5594	9.46352	9.46557	8.47573	6.78136	7.04439	6.90689	8.88264	8.78136	9.07414	8.16491	8.42626	8.05528	8.12928	9.3015	8.40514	8.47978	8.96	7.76818	7.98299	8.27612	8.74147	7.65821	9.3443	7.80735	7.7879	8.41785	8.95128
D38522_at	6.64386	6.64386	6.64386	6.64386	6.64386	6.64386	7.20945	7.25739	6.64386	6.64386	6.64386	6.64386	6.64386	6.64386	6.89482	6.64386	6.64386	6.64386	6.64386	6.65821	6.64386	6.64386	6.64386	7.10852	6.64386	6.64386	7.29462	6.64386	6.64386	7.14975	6.64386	6.70044	6.64386	6.64386	6.64386	6.64386	6.64386	6.67243	6.64386	6.64386	6.64386	6.64386	6.64386	6.64386	6.64386	6.64386	6.64386	6.64386	6.64386
D38524_at	8.02237	8.04439	8.01123	7.98868	8.6865	8.04439	7.45121	7.2384	8.20945	6.64386	6.65821	6.97728	6.64386	8.09276	8.57365	8.20457	7.59991	6.64386	7.31288	7.3837	6.64386	9.13443	6.64386	7.10852	8.55842	6.64386	7.48382	7.90087	8.09276	6.64386	6.64386	8.35315	8.88874	7.98868	8.20945	9.71253	8.24793	8.84235	8.87652	8.17493	8.07682	9.00843	8.87344	6.94251	8.62205	6.67243	9.50581	7.8009	8.13955
D38535_at	9.93958	8.66178	9.54882	9.39232	9.59246	10.3597	8.86419	8.79442	9.25974	7.7879	8.54303	9.18735	9.15735	9.45327	7.45943	9.30606	8.60363	9.2384	9.64386	8.50383	9.3966	10.1586	9.45738	9.55459	9.82655	9.89633	10.5584	9.17991	8.88264	9.01681	8.33539	10.4858	10.5098	10.0512	9.56605	9.72451	9.48784	8.76155	8.8009	9.62022	8.8857	10.3061	9.92184	9.17243	8.97441	8.75154	8.36194	9.53916	8.58496
D38548_at	8.46761	7.76818	10.1497	9.2854	10.4656	9.79442	9.63662	9.85643	9.91588	8.67948	9.67596	9.67772	9.44294	10.0954	9.66178	9.62753	8.96	8.45943	10.1293	9.48985	10.6008	8.45533	8.13443	8.49586	8.75822	8.8009	9.7364	7.55459	9.50383	8.06609	9.49386	8.81057	9.57175	8.33985	9.6865	8.84235	8.86728	9.37938	10.1241	9.07682	9.64205	8.14975	10.1331	9.78953	9.76818	9.96578	9.94691	10.6357	9.50978
D38549_at	9.71425	10.0389	8.50383	8.2384	9.56605	10.0251	8.62936	8.64024	8.56605	8.31288	8.19476	8.84235	8.8857	8.87958	8.60363	8.76155	7.8009	8.87344	9.11114	8.17493	9.69349	9.45121	8.48382	8	9.89936	8.43879	9.71425	8.66534	9.36851	9.09803	7.60733	9.45121	9.18488	8.20945	9.44294	8.03342	7.98868	9.38802	8.82337	7.03342	8.61102	9.74315	8.37069	6.94251	7.39232	8.68299	9.06609	6.93074	8.79442
D38550_at	8.12928	8.67596	8.14975	9.33316	10.6384	8.59991	9.28309	8.75489	8.86109	8.75154	8.36632	7.88264	7.73471	9.14466	8.82018	9.03067	9.43671	7.35755	8.87036	7.7879	7.49185	9.70044	8.94251	8.73809	9.33539	8.37504	8	8.16491	8.77808	8.33539	8.0607	9.07948	10.3891	9.41996	8.16491	9.11634	8.96	8.77808	9.07682	7.52356	8.71768	8.53138	8.74819	8.07146	9.08215	7.77479	10.2761	9.29692	9.03617
D38551_at	8.93664	8.31741	10.1176	9.44087	10.0293	8.62205	9.71425	8.90689	9.67066	9.62388	8.43045	8.49586	9.02514	9.79604	9.58308	9.66711	8.97154	8.53528	7.8392	6.64386	6.64386	8.97154	8.66534	8.37069	9.16993	7.98299	8.32643	8.09803	8.74483	8.2384	8.7039	9.54303	7.94251	8.72451	9.01123	9.90388	9.9901	9.42626	9.74147	8.99435	9.04166	8.62571	10.5392	9.76984	10.7305	7.5157	10.3815	9.74987	9.37721
D38552_at	7.45943	6.64386	7.45943	8.22882	9.3443	7.43463	8.71081	8.48382	8.19476	7.08746	8.01123	6.93074	7.97154	8.40514	8.83289	8.57743	7.56224	6.64386	7.46761	7.75489	6.64386	8.59991	7.7211	7.50779	7.20945	7.25739	7.37504	7.25739	6.64386	6.64386	6.64386	7.63662	9.88111	8.49586	7.40939	6.67243	7.49185	8.35755	8.00562	7.05528	7.52356	7.21917	6.64386	7.24793	8.25267	6.6865	8.48784	8.53138	8.90388
D38553_at	7.09803	7.76818	6.90689	8.56986	8.61839	7.56986	8.87036	7.97728	8.40939	8.40088	6.64386	7.18982	6.64386	7.26679	7.33092	6.79442	6.64386	8.55459	8.03342	7.67948	7.98299	6.76818	8.30834	7.53138	8.06609	7.6865	6.64386	6.83289	6.83289	6.75489	7.17991	7.54689	6.64386	8.23362	8.38802	6.80735	7.94251	8.15482	8	7.94837	7.82018	6.64386	8.56224	7.87652	8.55459	7.2854	8.57743	6.64386	7.96
D38555_at	6.64386	6.64386	7.59246	8.40939	8.56986	6.64386	9.16491	8.16993	8.5157	8.22882	7.26679	7.29462	8.5157	8.13955	9.85331	9.7364	8.31288	6.64386	6.64386	8.46352	7.64386	9.42206	6.64386	7.79442	8.19476	7.47573	6.64386	7.65105	6.80735	8.15987	8.33539	8.46761	6.91886	8.33092	8.40088	8.69	6.64386	8.59619	8.97728	8.16993	7.18982	6.64386	7.98299	7.65105	9.24555	6.64386	9.02237	8.90989	8.99435
D38583_at	6.64386	7.44294	6.64386	6.64386	6.64386	6.64386	6.64386	8.70736	6.64386	6.64386	6.64386	6.64386	6.64386	6.64386	7.16993	6.64386	8.94837	6.64386	6.91886	7.66534	11.3987	8.20457	6.64386	8.21917	11.2538	8.82655	8.08746	9.12412	6.64386	6.64386	6.64386	11.4305	7.31288	12.2624	6.64386	8.3966	6.64386	8.03342	9.37938	7.2384	6.64386	6.64386	7.94837	6.64386	6.64386	6.64386	6.64386	9.13186	7.09803
D38751_at	6.64386	6.64386	6.64386	6.64386	6.64386	6.64386	6.70044	6.64386	6.64386	6.64386	6.64386	6.64386	6.64386	6.64386	6.64386	6.64386	6.64386	6.64386	6.64386	6.64386	6.64386	6.64386	6.64386	6.64386	6.64386	6.64386	6.64386	6.64386	6.64386	6.64386	6.64386	6.64386	6.64386	6.64386	6.64386	6.64386	6.64386	6.64386	6.64386	6.64386	6.64386	6.64386	6.64386	6.64386	6.64386	6.64386	6.64386	6.64386	6.64386
D42038_at	6.64386	6.64386	6.64386	6.64386	6.64386	6.64386	6.64386	6.64386	6.64386	6.64386	6.64386	6.64386	6.64386	6.64386	6.64386	6.64386	6.64386	6.64386	6.64386	6.64386	6.64386	6.64386	6.64386	6.64386	6.64386	6.64386	6.64386	6.64386	6.64386	6.64386	6.64386	6.64386	6.64386	6.64386	6.64386	6.64386	6.64386	6.64386	6.64386	6.64386	6.64386	6.64386	6.64386	6.64386	6.64386	6.64386	6.64386	6.64386	6.64386
D42039_at	8.24793	6.64386	6.64386	7.06609	6.64386	8.09803	6.64386	6.64386	6.64386	6.64386	6.64386	6.64386	6.64386	6.64386	6.64386	6.64386	6.64386	7.42626	6.64386	8.12412	6.64386	6.64386	6.64386	6.64386	6.64386	6.64386	8.03342	6.64386	6.64386	6.64386	6.82018	7.08746	6.64386	6.64386	7.96578	6.64386	6.64386	6.64386	6.64386	6.64386	6.64386	6.64386	6.64386	6.64386	6.67243	6.64386	6.64386	6.64386	6.64386
D42041_at	9.20701	9.91139	9.62388	9.60548	9.82337	9.16742	10.0182	9.37287	9.56986	9.19229	9.35535	8.99435	8.81698	9.21675	10.5275	10.3805	9.35315	7.65821	9.59805	9.60733	10.098	10.0901	9.18239	9.64746	9.70908	9.53528	9.45327	8.9542	10.7228	9.25739	9.72281	10.5803	10.2586	9.90087	9.6865	9.06609	9.94544	9.62388	10.1331	9.20945	9.92481	9.3966	10.4051	9.2503	9.41785	9.01402	9.69349	9.03892	9.20457
D42043_at	10.5812	10.5108	10.5517	10.0566	11.2402	10.2155	10.2912	10.9723	10.0888	10.8345	10.813	9.64746	10.66	10.8321	11.978	11.1	11.4099	10.42	10.3332	11.3343	9.69697	10.2143	9.53528	10.5507	9.17493	9.10852	9.14211	9.03342	10.2264	9.57743	9.40514	10.4481	10.6724	10.1799	11.0835	11.3208	10.3287	10.8986	10.7465	9.42206	10.8384	10.0458	10.275	9.73978	9.62022	10.6018	11.3487	10.0701	10.3343
D42044_at	6.64386	6.64386	6.64386	6.64386	6.64386	6.64386	6.64386	6.93074	6.64386	7.06609	6.65821	6.64386	6.64386	6.64386	6.64386	6.64386	6.64386	6.64386	6.64386	6.64386	6.64386	6.64386	6.64386	6.64386	6.64386	6.64386	6.64386	6.64386	6.64386	6.64386	6.64386	6.64386	6.64386	6.64386	6.64386	6.64386	6.64386	6.64386	6.64386	6.64386	6.64386	6.64386	6.64386	6.64386	6.64386	6.64386	6.64386	6.64386	6.64386
D42045_at	6.64386	6.64386	6.64386	6.64386	6.64386	6.64386	6.64386	6.64386	6.64386	6.64386	6.64386	6.64386	6.64386	6.64386	6.64386	6.64386	6.64386	6.64386	6.64386	6.64386	6.64386	6.64386	6.64386	6.64386	6.64386	6.64386	6.64386	6.64386	6.64386	6.64386	6.64386	6.64386	6.64386	6.64386	6.64386	6.64386	6.64386	6.64386	6.64386	6.64386	6.64386	6.64386	6.64386	6.64386	6.64386	6.64386	6.64386	6.64386	6.64386
D42046_at	9.15987	9.71081	8.75154	8.30834	9.0634	9.72962	8.92481	9.43879	8.97728	7.90087	7.91886	8.73471	7.76818	8.24317	8.66534	8.61839	8.2384	8.5157	8.99152	8.64746	8.41363	9.30606	8.67243	9.20212	8.82972	9.24079	9.11114	8.57743	9.17493	8.46352	8.48382	9.56605	9.85643	8.40939	9.48985	8.96867	9.81378	9.2854	8.50383	9.97154	9.85331	9.67066	9.60363	8.51175	9.09803	8.80735	8.7879	8.84549	8.21432
D42047_at	7.60733	8.5157	7.40939	7.78136	8.52356	8.13955	7.06609	7.39232	6.64386	6.90689	7.34873	6.64386	7.21917	7.31288	8.01681	8.02237	6.88264	7.3837	8.33985	8.19967	6.74147	8.19476	7.73471	7.6865	8.79442	7.40939	9.0607	7.91886	8.43463	7.82655	6.64386	8.82337	8.82972	7.01123	8.36632	7.71425	8.32193	7.73471	8.18488	6.64386	8.46761	8.11374	7.94251	7.32193	6.93074	7.24793	8.37938	8.01681	7.76818
D42053_at	7.79442	6.64386	6.64386	7.91289	9.12153	8.03342	8.66178	6.64386	9.13186	7.34873	8.30834	6.64386	8.26679	7.8009	8.61471	7.65821	7.82018	6.64386	8.61102	6.64386	7.88874	8.69697	6.64386	8.03892	8.7879	8.43879	6.64386	8.01123	6.64386	7.94837	7.97728	8.48784	8.06609	7.17991	8.56986	9.32643	8.45533	8.66534	7.9542	9.12928	9.40939	8.98299	9.65284	6.64386	9.27146	6.74147	8.04439	7.21917	7.97154
D42054_at	6.64386	7.03342	7.74819	8.59246	9.53138	7.17991	8.03342	7.09803	7.7211	8	7.5157	6.64386	6.64386	7.19967	8.77149	9.21675	7.83289	6.64386	7.70044	7.27612	6.64386	6.64386	6.64386	7.82018	8.04985	6.64386	8.19476	7.93074	6.64386	6.64386	7.92481	7.36632	8.03342	7.86419	7.58496	6.64386	7.42626	7.69349	7.94837	7.56986	8.24793	6.98868	8.43879	6.65821	7.53138	6.64386	8.69349	6.64386	8.40088
D42055_at	6.64386	6.64386	6.64386	6.64386	7.8392	6.64386	6.64386	6.64386	6.64386	6.64386	6.64386	6.64386	6.64386	6.64386	6.64386	6.67243	6.64386	6.64386	6.64386	6.64386	6.64386	6.64386	6.64386	6.64386	6.64386	6.64386	6.64386	6.64386	6.64386	6.64386	6.64386	6.64386	6.64386	6.64386	6.64386	6.64386	6.83289	6.64386	6.64386	6.64386	6.64386	6.64386	6.64386	6.64386	6.64386	6.64386	6.6865	6.64386	6.64386
D42063_at	6.64386	7.27612	6.9542	7.39232	8.28077	6.64386	7.09803	6.84549	6.64386	6.64386	6.64386	6.64386	7.80735	8.29921	7.40088	8.12412	8.12928	6.64386	7.11894	6.72792	6.64386	8.82655	7.2854	7.03342	8.04985	6.64386	7.11894	6.64386	8.5812	6.93074	6.70044	7.04439	7.12928	6.64386	6.70044	7.82655	7.37504	6.64386	7.58496	6.64386	6.90689	6.64386	7.63662	7.15987	8.54303	6.64386	8.01123	6.64386	6.64386
D42072_at	6.64386	6.64386	6.64386	6.64386	6.64386	6.64386	6.64386	6.64386	6.64386	6.64386	6.64386	6.64386	6.64386	6.64386	6.64386	6.64386	6.64386	6.64386	6.64386	6.64386	6.64386	6.64386	6.64386	6.64386	6.64386	6.64386	6.64386	6.64386	6.64386	6.64386	6.64386	6.64386	6.64386	6.64386	6.64386	6.64386	6.64386	6.64386	6.64386	6.64386	6.64386	6.64386	6.64386	6.64386	6.64386	6.64386	6.64386	6.64386	6.64386
D42073_at	6.64386	6.64386	6.64386	7.45943	6.64386	6.64386	7.11894	6.64386	6.64386	6.71425	6.64386	6.64386	6.64386	6.64386	6.64386	6.64386	6.64386	6.64386	6.64386	6.64386	6.64386	7.19967	6.64386	6.64386	6.64386	6.64386	6.64386	6.64386	6.64386	6.64386	6.64386	6.64386	6.64386	6.64386	6.64386	6.64386	7.22882	6.64386	6.78136	6.64386	6.64386	6.64386	9.10852	6.64386	6.64386	6.64386	7.01123	6.64386	6.64386
D42084_at	9.29232	8.18982	8.13955	9.37938	9.91886	9.03617	8.91289	8.55842	8.06609	7.65105	8.36194	8.0607	8.51964	8.90087	9.56605	9.5157	9.03617	8.07146	8.87958	8.04439	6.64386	9.64205	8.56224	8.53138	9.44708	7.56986	8.45943	8.55842	8.61471	7.87652	8.58496	8.97154	9.70044	8.48784	8.36632	9.70908	8.8857	9.04985	9.42417	7.64386	8.00562	7.59246	8.90989	8.54303	9.16742	6.87036	9.90989	9.67243	9.46148
D42085_at	9.26444	7.79442	9.44915	9.77149	9.72451	10.2479	7.93074	9.80735	8.25739	8.58871	8.71768	9.10329	8.93074	9.10591	9.3837	9.40727	9.22641	9.60363	9.56796	8.85175	8.40514	9.57554	9.7039	9.69174	9.77479	7.6865	8.5812	9.43254	9.45943	9.23362	9.0954	9.36413	9.96578	9.45327	8.17493	10.0056	10.1098	9.92035	9.37504	9.45943	9.86728	9.82018	9.67066	8.58871	9.15987	6.96578	9.22641	8.70736	9.17742
D42087_at	8.28077	8.18488	8.30378	8.17493	8.65821	6.64386	7.42626	7.86419	6.64386	7.67243	7.14975	6.85798	8.71768	8.7039	8.98868	8.9571	7.90087	6.64386	7.46761	6.64386	6.64386	8.40514	8.18488	6.90689	8.89785	6.64386	7.20945	7.76818	8.82972	6.85798	6.64386	8.17991	8.52356	7.92481	7.88874	8.43045	6.76818	6.88264	8.44708	6.64386	7.67243	6.64386	7.92481	6.82018	8.67243	7.12928	8.37069	7.53916	8.01123
D42108_at	7.16993	6.64386	6.64386	6.64386	6.64386	6.67243	6.64386	6.64386	6.64386	6.97728	6.64386	6.6865	6.64386	6.64386	6.64386	6.64386	6.64386	6.64386	6.64386	6.64386	6.64386	6.64386	6.64386	6.64386	6.64386	7.05528	6.64386	6.64386	6.83289	6.64386	6.64386	6.64386	7.31288	6.82018	6.64386	6.64386	7.48382	6.64386	6.64386	7.40939	6.64386	6.64386	6.89482	6.64386	7.26679	6.64386	6.64386	6.64386	6.64386
D42123_at	10.6821	11.2603	9.79928	9.87498	9.53722	11.0553	9.16491	9.49785	8.32643	9.24317	8.64024	9.18239	9.95565	10.4939	10.0688	10.0954	9.39874	9.93811	9.91886	9.44915	9.41151	10.5265	10.2021	9.69349	10.1202	9.40939	10.5343	9.1267	11.0417	9.77643	9.04439	10.5118	10.2992	9.89785	10.3038	9.87036	9.85175	9.88874	10.4136	9.92778	9.88264	10.268	10.196	9.87652	9.40939	9.48583	9.783	9.73132	9.46148
D42138_at	8.14975	8.62571	6.94251	7.34873	7.07682	8.54689	6.64386	6.9542	6.64386	6.64386	6.64386	6.64386	6.64386	7.59246	7.19967	6.64386	6.87036	6.93074	7.3837	6.64386	7.16993	8.46352	6.64386	6.64386	8.2384	7.50779	7.45943	6.93074	7.53916	6.64386	6.64386	7.64386	8.25739	7.17991	7.73471	7.88264	8.88874	7.73471	7	6.64386	7.09803	8.48784	7.07682	7.40939	7.27612	6.98868	6.64386	7.8392	7.15987
D43636_at	6.64386	6.64386	6.91886	7.40939	9.04166	6.64386	7.81378	7.86419	7.27612	7.70044	6.64386	6.64386	9.07948	9.97871	8.64024	8.64746	9.21917	6.64386	7	6.64386	6.64386	9.59059	6.85798	6.64386	6.64386	6.64386	6.64386	7.66534	6.64386	6.64386	7.04439	6.64386	6.64386	7.58496	6.96578	9.09803	7.53138	6.64386	7.34873	6.64386	6.64386	7.94837	8.0607	6.80735	7.31288	6.80735	8.91886	9.46148	8
D43638_at	8.02237	6.64386	7.15987	6.64386	6.64386	8.64386	6.64386	6.64386	6.64386	6.64386	6.64386	6.64386	6.64386	6.93074	7.45943	6.64386	6.64386	6.67243	6.64386	6.64386	6.64386	6.64386	6.64386	7.26679	11.1299	7.15987	7.75489	9.52943	10.151	6.64386	6.64386	8.23362	8.00562	6.84549	7.39232	7.14975	7.62936	6.72792	7.10852	6.90689	6.64386	7.29462	6.64386	6.64386	6.89482	6.64386	7.15987	6.72792	6.93074
D43642_at	11.0895	10.6303	10.6847	10.8258	11.4419	11.703	10.5622	10.363	10.4898	10.0647	9.89178	10.0782	10.2348	10.7168	10.4979	10.9915	10.2143	10.8933	10.4676	10.7271	10.1046	11.239	10.6768	10.7457	10.7748	10.5887	11.1668	10.4094	10.9578	10.1849	9.87036	11.4019	11.6073	10.9801	11.3647	10.5372	11.3276	11.4115	10.9643	10.6083	11.2946	10.7574	10.9744	10.7715	10.3465	9.95128	11.0091	10.8305	10.7381
D43767_at	8.29002	6.64386	6.64386	7.63662	7.40939	7.8009	6.87036	10.1189	6.64386	6.64386	6.89482	6.64386	8.77479	8.00562	6.84549	8.43463	7.31288	7.14975	6.64386	7.33985	6.64386	8.04985	7.59246	7.48382	8.08746	7.74147	7.50779	6.64386	7.33985	6.91886	6.78136	7.83289	8.40088	8.05528	8.99718	7.03342	8.00562	7.88264	7	6.64386	7.9542	6.76818	7.8009	7.24793	7.46761	7.42626	6.94251	7.74819	6.91886
D43768_at	6.64386	6.64386	6.64386	6.64386	6.64386	6.64386	6.64386	6.64386	6.64386	6.64386	6.64386	6.64386	6.64386	6.64386	6.64386	6.64386	6.64386	6.64386	6.64386	6.64386	6.64386	6.64386	6.64386	6.64386	6.64386	6.64386	6.64386	6.64386	6.64386	6.64386	6.64386	6.64386	6.64386	6.64386	6.64386	6.64386	6.64386	6.64386	6.64386	6.64386	6.64386	6.64386	6.64386	6.64386	6.64386	6.64386	6.64386	6.64386	6.64386
D43772_at	7.21917	7.30378	6.64386	7.33092	8.19967	6.64386	6.64386	7.96	6.72792	6.64386	6.64386	6.64386	6.64386	6.67243	6.64386	6.64386	7.74819	7.44294	7.26679	7.98868	6.64386	7.45121	6.64386	6.64386	7.10852	6.64386	6.64386	7.71425	6.64386	6.64386	6.64386	6.64386	8.77808	8.58496	7.08746	6.64386	6.80735	6.64386	7.93664	6.64386	6.64386	7.09803	6.76818	6.9542	6.64386	6.74147	6.89482	6.64386	6.65821
D43947_at	6.96578	7.33092	6.64386	7.50779	9.0954	6.64386	9.59991	8.42206	8.88264	8.25739	9.25974	7.77479	8.57365	8.07682	9.74315	9.2503	8.20457	6.64386	8.04985	7.16993	6.64386	6.64386	6.64386	6.64386	6.64386	6.64386	6.64386	6.64386	7.65105	6.64386	7.57743	7.88264	8.92778	7.49185	6.64386	7.03342	6.64386	8.23362	9.67066	6.64386	7.91289	6.64386	8.11894	6.64386	7.10852	7.12928	8.74147	7.49185	9.03892
D43948_at	8.46761	7.85798	8.19476	8.96	9.82177	7.66534	8.85487	7.88874	8.40514	7.6865	6.64386	6.80735	7.62936	7.85175	9.17243	8.65464	7.7211	8.75154	7.46761	8.2384	6.65821	8.75822	8.49985	8.29002	8.87652	8.17991	7.73471	7.6865	8.00562	6.64386	7.98868	7.84549	9.90087	7.88264	8.31288	8.86109	9.13443	9.09276	9.60363	8.56986	8.11374	7.06609	9.44915	7.40088	9.24079	7.18982	9.65821	8.73809	9.07948
D43949_at	9.35315	9.90839	7.30378	8.48784	9.7364	9.69697	8.92184	9.48784	9.3443	9.17493	9.44708	8.84235	9.45533	9.45738	9.13186	9.92926	9.2503	9.07414	9.53333	9.72451	8.88264	9.65105	9.17243	9.66534	8.74147	8.57365	9.49185	6.64386	8.7879	8.43463	8.98868	9.66356	9.67596	9.42626	9.77972	9.19967	10.4909	9.80735	9.12412	9.98442	9.74819	9.7879	10.1699	9.51767	9.59619	8.86109	9.89936	9.65642	8.97154
D43950_at	7.04439	9.01681	8.18488	9.42417	10.3231	10.0042	10.1111	9.05799	9.47978	9.37504	9.31741	8.58871	7.88264	8.46352	10.3376	10.1396	8.10329	9.78627	8.61839	8.95128	8.82972	9.43671	7.76155	7.70736	9.76653	8.81378	8.56986	8.9629	8.77808	8.3443	10.2515	10.1421	9.02237	9.33092	9.48985	7.94837	9.87036	9.86419	10.7381	9.47371	9.84862	8.19476	10.3805	9.51175	9.05528	8.02237	9.63662	10.0821	10.115
D43951_at	7.91289	9.02791	9.04985	8.90989	10.3231	8.69697	8.90388	8.64746	8.52748	8.49185	7.58496	7.08746	9.04439	10.4778	10.0224	9.43671	9.75822	8.52748	8.59246	8.3443	6.87036	10.8242	8.45533	8.40514	8.98868	8.18982	7.14975	8.27146	9.67772	7.94837	7.8009	9.29232	10.2095	9.22882	9.30378	8.22882	9.24317	8.49586	9.3966	7.78136	9.27612	9	9.67243	8.37938	9.9571	7.6865	10.0265	9.0634	9.03342
D44466_at	6.64386	7.74819	6.78136	8.49586	9.59991	6.64386	8.11374	6.64386	8.03342	7.64386	7.39232	6.64386	6.78136	6.64386	9.11634	8.33092	7.87652	6.64386	7.16993	7.40939	7.41785	9.04985	7.57743	6.64386	7.37504	7.01123	6.64386	6.64386	6.64386	7.70044	8.81057	7.90087	6.64386	6.70044	7.48382	6.64386	8.82972	6.64386	9.13955	7.65821	6.64386	6.64386	9.49185	6.64386	8.83605	6.64386	9.3443	8.47573	8.3837
D45248_at	10.6284	9.75822	10.6909	11.5817	11.8807	11.4984	10.9084	10.2155	11.5594	10.3083	11.0077	10.4757	10.744	10.2609	11.6234	11.8665	10.4737	10.6751	10.3151	10.8595	11.2685	9.43045	7.70736	9.89482	10.84	9.59991	10.275	9.79442	8.45533	10.6715	10.6856	11.4435	11.5512	10.8719	11.0688	10.8431	11.6702	10.0084	11.4278	10.6537	10.4491	8.97441	10.9972	11.2021	9.86882	10.2107	11.5083	11.0674	11.733
D45370_at	7.92481	6.64386	6.64386	6.64386	7.85798	9.61102	6.64386	6.64386	7.53138	6.64386	7.49985	7.3837	7.52356	8.21917	6.64386	7.29462	8.21917	8.90989	8.99152	6.64386	6.64386	9.16239	8.65821	8.29462	7.5157	6.64386	6.64386	6.64386	8.90989	6.64386	6.64386	7.7211	6.64386	6.64386	6.64386	7.41785	6.64386	6.64386	6.64386	7.21917	9.26209	7.76155	7.2854	8.24793	8.31741	6.64386	8.66178	7	6.64386
D45371_at	8.89785	10.6786	8.49985	8.03342	8.61102	9.87652	8.14466	8.42206	8.10329	8.35315	8.14466	7.73471	8.11894	8.07146	8.42626	7.90087	7.70736	8.77808	8.73809	8.2854	9.64926	9.31741	8.7879	8.88264	8.41363	7.64386	7.62205	7.21917	8.84235	8.64386	8.61102	9.46761	10.7448	9.2384	9.20701	9.02514	9.40939	8.91289	8.33539	8.58871	9.20701	9.20457	9.24079	9.16993	8.49185	8.54303	8.64746	9.16993	6.64386
D45399_at	6.64386	6.64386	6.64386	6.64386	6.64386	6.64386	6.64386	6.84549	6.64386	6.64386	6.64386	6.64386	6.64386	6.64386	6.84549	6.64386	6.64386	6.64386	6.64386	6.64386	6.64386	6.64386	6.64386	7.14975	6.64386	6.64386	6.64386	6.64386	6.70044	6.64386	6.64386	6.64386	7.91289	6.64386	6.64386	6.64386	7.02237	6.64386	6.64386	7.14975	6.64386	6.64386	6.64386	6.64386	6.64386	6.64386	6.64386	6.64386	6.64386
D45906_at	6.64386	6.72792	6.64386	6.64386	6.64386	6.64386	7.16993	9.10329	6.64386	6.64386	7.76818	7.83289	6.64386	6.64386	6.64386	8.19476	6.64386	6.64386	8.16993	7.21917	6.64386	6.64386	6.64386	6.64386	8.50383	7.98299	6.87036	6.64386	6.64386	6.64386	6.64386	9.28771	7.26679	6.64386	6.64386	6.64386	6.64386	6.64386	7.56986	6.64386	6.64386	6.64386	8.26209	6.64386	6.64386	6.64386	6.64386	6.64386	7.43463
D49357_at	6.64386	6.64386	6.64386	6.64386	6.64386	6.64386	6.64386	8.14466	8.34873	6.64386	6.64386	6.64386	6.64386	6.64386	6.64386	6.64386	6.64386	7.54689	6.64386	6.64386	7.09803	6.64386	6.64386	8.03892	6.64386	7.44294	6.64386	6.64386	6.64386	6.64386	6.64386	6.64386	6.64386	6.64386	6.64386	6.64386	6.64386	6.64386	7.88264	6.64386	6.64386	6.64386	7.65105	7.21917	7.16993	7.32193	6.64386	7.83289	6.6865
D49387_at	6.75489	7.21917	7.77479	7.45943	8.30834	8.90087	6.64386	6.93074	6.64386	6.64386	6.64386	6.94251	6.9542	7.65105	7.07682	6.64386	6.91886	7.52356	6.94251	7.06609	6.64386	6.94251	6.93074	7.59246	8.13955	6.64386	8.43463	7.55459	8.224	6.64386	7.26679	6.64386	7.89482	7.54689	7.14975	6.88264	7	6.64386	7.04439	6.64386	7.5157	7.18982	6.96578	7.41785	6.64386	7.09803	7.84549	6.64386	6.64386
D49394_at	6.64386	6.64386	6.64386	6.64386	6.64386	7.94251	6.64386	6.64386	6.64386	6.64386	6.64386	6.64386	6.64386	6.64386	6.64386	6.64386	6.64386	6.64386	6.64386	6.64386	6.64386	6.64386	6.64386	6.64386	6.64386	6.64386	6.64386	6.64386	7.08746	6.64386	6.72792	6.64386	6.64386	6.64386	6.64386	6.64386	6.64386	6.64386	6.64386	6.64386	6.64386	6.64386	6.64386	6.64386	6.64386	6.64386	6.64386	6.64386	6.64386
D49396_at	7.2854	7.08746	6.64386	8.31741	9.38586	6.64386	7.70736	6.64386	7.3837	7.25739	6.64386	7.01123	6.64386	6.64386	8.17493	8.07146	6.64386	7.74147	6.88264	7.73471	7.64386	6.64386	6.64386	7.42626	9.7039	7.86419	7.2384	8.17991	6.94251	6.64386	8.13955	8.52356	6.64386	7.65105	6.64386	7.67243	8.26209	7.78136	9.0634	7.21917	7.61471	6.64386	8.15987	6.64386	6.76818	7.14975	9.34651	7.67948	8.24793
D49400_at	10.1561	9.97585	9.41996	10.1523	10.4594	10.6055	10.0224	9.60363	9.94691	9.9542	9.65821	9.81858	9.52943	9.45533	9.89178	9.74483	9.77643	9.75822	9.59805	9.20212	11.4605	11.4179	10.3049	10.9873	10.3197	10.2058	9.95855	9.60918	10.1997	10.1737	10.5008	10.8781	9.76818	10.7099	10.1972	10.1293	10.7871	9.89785	10.7566	10.2264	9.71939	9.89178	10.5324	10.0196	9.85487	9.91737	9.96578	10.2527	10.6618
D49410_at	9.81057	9.29921	8.88874	10.4346	10.4062	10.0279	8.82337	8.48382	9.14466	10.7465	11.1092	8.89482	7.91886	10.1624	9.75154	10.3185	8.85487	9.65464	8.90087	9.44294	9.09276	10.0014	9.20212	9.34207	9.71939	9.02237	9.93958	9.12412	9.83289	8.32643	8.30834	9.90689	10.5285	9.91886	9.05257	8.98584	9.22641	9.12412	9.2854	8.25267	9.04985	9.3443	8.49586	8.20457	8.22882	9.35755	10.1408	8.21917	8.8009
D49488_at	6.98868	6.64386	6.64386	7.19967	6.98868	6.89482	6.64386	6.64386	6.64386	6.64386	6.64386	7.09803	6.64386	6.64386	6.64386	6.64386	6.64386	6.64386	6.64386	6.64386	6.64386	6.64386	6.64386	6.76818	6.64386	6.64386	7.69349	6.64386	6.64386	6.64386	6.64386	6.64386	8.06609	6.64386	6.64386	6.79442	6.65821	6.64386	6.64386	6.65821	7.01123	6.64386	6.67243	6.64386	6.75489	6.64386	6.64386	6.78136	6.64386
D49489_at	10.0126	9.40939	9.69	10.4868	11.2744	10.4062	10.697	10.2503	10.2644	10.927	10.4645	9.32193	9.07948	10.2216	10.7432	11.265	8.2384	10.1137	10.1357	9.27612	9.06878	10.196	9.99294	9.67066	10.888	9.53916	9.37504	10.4848	9.63118	9.8392	10.676	10.0375	8.53528	9.40514	9.99435	9.97585	9.53528	10.2348	11.29	8.62936	10.1215	9.49386	10.4767	9.62936	9.67596	9.28077	10.9285	9.13186	11.2198
D49490_at	9.39017	8.37938	6.64386	9.39232	9.75656	10.1176	6.64386	9.07146	6.64386	7.81378	8.81378	6.64386	7.9542	8.35315	9.64205	8.77479	8.43463	9.21432	7.05528	8.72792	8.45943	9.65821	9.45738	6.6865	9.78627	8.08215	10.1749	9.64386	9.20212	6.64386	7.63662	6.64386	6.64386	9.53333	6.64386	9.39017	10.2228	9.44087	8.66888	9.37721	9.69349	7.2384	9.64205	6.64386	9.7039	8.90989	8.33092	6.64386	8.30378
D49493_at	6.64386	8.38802	6.64386	6.64386	6.64386	6.64386	6.64386	6.64386	6.64386	6.64386	6.64386	6.64386	6.64386	6.64386	6.64386	6.64386	6.64386	6.64386	6.64386	6.64386	6.64386	6.64386	6.64386	6.64386	6.64386	6.64386	6.64386	6.64386	6.64386	6.64386	6.64386	6.64386	6.64386	6.64386	6.64386	6.64386	6.64386	6.64386	6.64386	6.64386	6.64386	6.64386	7.44294	6.64386	6.64386	6.64386	6.64386	6.64386	6.64386
D49677_at	6.64386	6.64386	6.64386	6.64386	6.64386	6.64386	6.64386	6.64386	6.64386	6.64386	6.64386	6.64386	6.64386	6.64386	6.64386	6.64386	6.64386	6.64386	6.64386	6.64386	6.64386	6.64386	6.64386	6.64386	6.64386	6.64386	6.64386	6.64386	6.64386	6.64386	6.64386	6.64386	6.64386	6.64386	6.64386	6.64386	6.64386	6.64386	6.64386	6.64386	6.64386	6.64386	6.64386	6.64386	6.64386	6.64386	6.64386	6.64386	6.64386
D49738_at	10.0014	9.68825	10.1319	9.56224	10.5613	9.59432	10.4818	8.51964	10.7591	10.1799	9.96	9.51373	10.1007	11.0362	11.6524	10.6375	9.75989	9.91139	8.81378	9.30378	10.3185	10.0768	9.18735	9.17243	10.242	8.48784	9.17493	9	9.47776	9.19722	9.83763	10.1724	10.0674	9.98299	9.91139	10.7108	10.2597	9.85643	10.891	9.9901	10.697	8.93958	11.1434	10.4115	10.4136	9.47371	10.4221	10.4502	10.9009
D49742_at	6.64386	6.64386	6.64386	6.64386	6.64386	6.64386	6.64386	6.64386	6.64386	6.64386	6.64386	6.64386	6.64386	6.64386	6.64386	6.64386	6.64386	6.64386	6.64386	6.64386	6.64386	6.64386	6.64386	6.64386	6.64386	6.64386	6.64386	6.64386	6.64386	6.64386	6.64386	6.64386	6.64386	6.64386	6.64386	6.64386	6.64386	6.64386	6.64386	6.64386	6.64386	6.64386	6.64386	6.64386	6.64386	6.64386	6.64386	6.64386	6.64386
D49817_at	6.65821	6.64386	9.01402	7.10852	8.13443	8.67243	7.5157	6.64386	6.64386	7.42626	6.64386	6.64386	6.64386	6.64386	6.64386	6.64386	6.64386	8.16491	6.64386	6.64386	7.93074	9.83131	9.63662	9.13955	6.70044	6.64386	6.64386	6.79442	6.64386	7.16993	6.64386	8.45121	9.3015	9.45327	6.64386	8.67948	8.98014	6.72792	6.98868	8.02791	8.9629	6.84549	8.62571	8.57365	6.64386	9.03342	6.64386	7.42626	9.05799
D49818_at	6.64386	6.64386	8.43879	6.64386	6.64386	6.64386	6.64386	6.64386	6.64386	6.64386	8.21917	6.87036	8.36632	6.64386	9.57743	7.8392	6.64386	8.98299	6.64386	8.97441	9.57175	6.64386	8.27146	9.20701	6.74147	7.97154	6.64386	7.96578	6.64386	6.64386	8.51964	6.64386	6.64386	6.64386	6.64386	8.62205	6.64386	6.78136	6.64386	7.88264	8.9629	6.64386	9.20945	8.40088	6.64386	6.64386	6.64386	6.64386	9.10066
D49950_at	7.74147	7.87036	6.64386	7.57743	6.64386	7	6.64386	6.64386	6.64386	7.14975	6.64386	6.64386	6.71425	7.18982	7.17991	6.64386	6.64386	6.64386	6.64386	7.67948	6.76818	6.72792	7.7211	8.43463	7.67243	6.64386	7.2384	7.5157	7.45121	7.76818	6.64386	7.96578	8.82972	8.37938	6.64386	7.01123	6.64386	7.76818	6.78136	6.64386	6.84549	6.64386	6.64386	6.64386	6.64386	6.64386	6.6865	6.64386	7.30378
D49958_at	6.64386	6.64386	6.64386	6.64386	6.64386	7.45943	6.64386	6.64386	6.64386	6.64386	6.64386	6.64386	6.64386	6.64386	6.64386	6.64386	6.64386	8.30834	6.64386	6.64386	6.64386	6.80735	6.64386	6.64386	6.97728	6.64386	7.91289	7.02237	6.64386	6.64386	6.64386	6.80735	7.10852	6.64386	6.64386	6.64386	7.13955	6.64386	6.64386	6.64386	6.74147	6.64386	6.84549	6.64386	7.3837	6.64386	6.64386	6.64386	6.64386
D50063_at	9.7211	9.81057	9.25739	9.90388	10.9462	10.1774	10.1984	9.96867	10.1202	9.36194	8.89785	9.75822	9.45943	9.79116	10.3619	9.91886	9.84235	9.61287	9.86419	10.1434	9.17742	10.1561	9.11114	9.93221	9.61655	9.79442	9.64926	9.17493	9.46761	8.89178	9.67772	10.2773	9.60363	9.5157	10.3343	10.2444	10.5708	9.98584	10.218	10.0914	10.1189	9.54689	10.9076	9.60918	10.5925	9.34651	10.2656	10.2324	10.4367
D50310_at	11.7969	11.3832	12.3081	11.137	12.2411	11.4357	11.5018	10.8234	10.8098	10.9571	11.0314	10.8074	11.7326	11.9996	12.042	12.0795	12.5108	10.6795	10.9454	11.0821	10.6609	13.238	12.8414	12.9484	11.6325	10.8009	11.0049	9.99577	11.9954	11.4757	11.1111	11.6284	11.6843	10.9901	11.9769	12.7444	12.4325	11.9866	11.905	11.899	11.6198	11.6216	12.9928	11.585	12.5736	11.5755	12.3211	11.9618	12.0403
D50312_at	6.64386	6.64386	6.64386	6.64386	6.64386	6.64386	6.64386	6.64386	6.64386	6.64386	6.64386	6.64386	6.64386	6.64386	6.64386	6.64386	6.64386	6.64386	6.64386	6.64386	6.64386	6.64386	6.64386	6.64386	6.64386	6.64386	6.64386	6.64386	6.64386	6.64386	6.64386	6.64386	6.64386	6.64386	6.64386	6.64386	6.64386	6.64386	6.64386	6.64386	6.64386	6.64386	6.64386	6.64386	6.64386	6.64386	6.64386	6.64386	6.64386
D50370_at	6.64386	6.64386	6.64386	6.64386	6.64386	7.13955	6.64386	6.64386	6.64386	6.64386	6.64386	6.64386	6.64386	7.30378	6.64386	6.64386	6.64386	6.70044	7.11894	6.64386	6.64386	6.78136	6.64386	6.64386	7.07682	6.64386	7.40939	6.64386	6.64386	6.64386	6.64386	7.22882	6.98868	6.64386	7.21917	6.64386	7.88264	6.64386	6.72792	6.90689	6.64386	6.64386	7.11894	6.64386	6.64386	6.64386	6.64386	7.01123	6.64386
D50402_at	6.64386	6.64386	6.64386	6.64386	6.64386	6.64386	6.64386	6.64386	6.64386	6.64386	6.64386	6.64386	6.64386	6.64386	6.64386	6.64386	6.64386	6.64386	6.64386	6.64386	10.0993	6.64386	6.64386	6.64386	6.64386	6.64386	6.64386	6.64386	6.64386	6.64386	6.64386	8.44294	6.64386	9.01123	6.64386	6.64386	6.64386	6.64386	6.64386	6.64386	6.64386	6.64386	6.64386	6.64386	6.64386	6.64386	6.64386	6.64386	6.64386
D50487_at	6.64386	6.64386	7.01123	6.64386	7.16993	6.64386	6.84549	7.40939	7.05528	6.72792	6.64386	6.64386	7.39232	7.02237	7.49985	7.71425	6.64386	7.19967	6.64386	6.64386	6.64386	7.65821	7.2854	6.64386	6.64386	6.64386	6.64386	6.64386	6.64386	7.04439	6.70044	6.64386	6.64386	6.64386	6.64386	6.64386	6.64386	6.64386	6.64386	6.64386	7.41785	7.65821	6.64386	6.64386	7.54689	6.64386	6.64386	8.01123	6.64386
D50495_at	7.31288	6.64386	6.64386	6.64386	7.20945	6.64386	6.64386	6.64386	7.50779	8.58871	6.64386	6.64386	7.42626	6.64386	9.20701	7.82655	6.64386	6.74147	8.03342	8.71768	6.64386	6.64386	7.65105	6.64386	6.64386	6.64386	8.48382	6.64386	6.64386	6.64386	6.64386	6.64386	6.98868	6.64386	6.64386	6.64386	8.08215	6.64386	6.74147	6.64386	6.64386	6.64386	6.64386	7.65821	6.64386	6.64386	7.97154	6.64386	6.9542
D50525_at	9.31967	7.77479	7.90689	8.29002	9.39446	7.56986	8.93074	8.30834	8.59991	7.74819	7.49985	7.80735	8.37504	8.71081	9.15735	9.37069	7.78136	7.3837	8.12928	7.88264	6.72792	9.40514	7.69349	7.59991	7.82018	7.05528	7.73471	7.06609	8.2854	7.10852	8.25739	7	10.2131	7.79442	9.19967	8.30378	10.4009	8.87344	9.43671	9.08215	9.23601	8.77149	9.28077	8.3837	8.45943	7.80735	9.86264	8.29002	9.51373
D50532_at	6.64386	7.69349	6.64386	6.64386	6.64386	6.64386	6.64386	8.29462	6.64386	6.64386	8.15482	6.64386	7.87036	6.64386	6.64386	6.64386	6.96578	8.42626	6.64386	8.16491	7.70044	6.64386	7.62205	8.22882	7.36632	8.17991	8.17991	7.06609	6.64386	9.14975	6.64386	7.05528	6.64386	7.54689	7	6.64386	6.88264	6.64386	6.64386	8.08746	6.64386	6.64386	6.64386	6.64386	6.67243	8.21917	6.80735	7.08746	8.04439
D50582_at	6.64386	6.64386	6.64386	6.64386	6.64386	6.64386	6.64386	7.06609	6.64386	6.64386	6.64386	6.83289	6.64386	6.64386	6.64386	6.64386	6.64386	6.64386	6.64386	6.64386	6.64386	6.64386	6.64386	6.64386	6.64386	6.64386	6.64386	6.64386	6.64386	6.64386	6.64386	6.64386	6.64386	6.64386	6.64386	6.64386	6.64386	6.64386	6.64386	6.64386	6.64386	6.64386	6.64386	6.64386	6.64386	6.64386	6.64386	6.64386	6.64386
D50640_at	6.64386	6.64386	6.64386	6.64386	7.46761	6.64386	6.64386	6.64386	6.64386	6.64386	6.64386	6.90689	7.50779	6.65821	6.64386	7.19967	6.82018	6.64386	7.59246	6.64386	6.64386	7.76155	6.64386	6.64386	6.90689	6.64386	6.67243	6.64386	6.64386	6.64386	6.64386	6.64386	7.91289	7.11894	6.64386	7.45943	7.31288	7.91886	6.64386	6.64386	7.09803	7.78136	6.64386	6.64386	6.64386	6.64386	6.65821	6.82018	7.31288
D50645_at	6.64386	6.64386	6.64386	7.39232	8.86728	6.64386	6.64386	6.64386	6.64386	6.64386	6.64386	6.64386	6.64386	6.64386	6.64386	7.34873	6.64386	6.64386	6.64386	6.64386	7.26679	6.64386	6.64386	6.64386	7.02237	6.64386	6.64386	6.64386	6.64386	6.64386	6.64386	7.12928	6.64386	6.64386	6.64386	6.64386	6.64386	6.64386	7.89482	6.64386	6.64386	6.64386	6.64386	6.64386	6.93074	6.64386	7.53916	6.64386	6.64386
D50663_at	6.64386	9.04439	6.88264	8.90388	10.014	8.33539	9.29232	7.96	7.62936	7.72792	8.21432	7.3837	8.69349	8.97441	9.71596	8.15987	6.64386	8.69349	8.75489	9.10066	9.81218	9.39446	8.64386	8.633	9.92035	7.29462	8.27146	8.87344	8.04439	9.00562	8.84549	10.4073	8.56605	9.75822	7.49185	9.42417	7.32193	9.16239	9.43463	6.64386	9.4818	6.98868	6.9542	7.13955	7.34873	9.64566	9.56796	6.89482	10.0888
D50678_at	6.64386	6.64386	6.64386	6.64386	6.64386	6.64386	6.64386	6.64386	6.64386	6.64386	6.64386	6.64386	6.64386	6.64386	6.64386	6.64386	6.64386	6.64386	6.64386	6.64386	6.64386	6.64386	6.64386	6.64386	6.64386	6.64386	6.64386	6.64386	6.64386	6.64386	6.64386	6.64386	6.64386	6.64386	6.64386	6.64386	6.64386	6.64386	6.64386	6.64386	6.64386	6.64386	6.64386	6.64386	6.64386	6.64386	6.64386	6.64386	6.64386
D50683_at	7.55459	8.50383	6.64386	9.47573	9.14211	6.80735	9.40939	8.7879	8.38802	7.77479	6.64386	8.15987	8.82655	9.81057	10.1472	9.26679	8.56224	7.31288	8.25739	7.14975	7.50779	8.67243	8.66534	8.35315	9.3837	6.94251	6.94251	6.64386	6.96578	6.9542	7.26679	9.10852	7.31288	8.76487	7.11894	8.62936	6.64386	9.30834	8.81057	6.75489	8.39232	9.74819	7.05528	6.64386	9.59619	6.64386	8.61102	7.94837	9.86882
D50692_at	6.64386	9.17742	6.64386	8.13443	9.58496	6.64386	8.74147	8.09803	6.94251	6.64386	6.64386	6.64386	6.64386	6.64386	8.87958	7.97154	6.64386	7.04439	6.64386	6.98868	7.80735	6.64386	6.64386	6.64386	9.06609	7.65821	7.04439	7.61471	6.64386	6.64386	8.66534	7.94251	6.64386	9.66711	7.33092	6.64386	6.64386	7.55459	8.85798	6.64386	6.64386	6.64386	6.64386	6.64386	6.64386	6.64386	8.15987	8.47978	9.06878
D50810_at	6.64386	6.64386	6.64386	6.67243	6.64386	6.71425	6.64386	6.64386	6.64386	6.64386	6.64386	6.64386	6.64386	6.64386	6.64386	7.53916	6.64386	6.64386	6.64386	6.64386	6.64386	6.64386	6.64386	6.64386	6.64386	6.64386	6.64386	6.64386	6.64386	6.64386	6.64386	6.64386	6.64386	6.64386	6.64386	6.64386	6.93074	6.64386	8.16491	6.64386	6.64386	6.64386	6.64386	6.64386	6.64386	6.64386	6.64386	6.64386	7.35755
D50840_at	10.1497	6.64386	9.71768	10.8619	10.5962	9.48583	7.84549	10.1923	8.08215	7.56224	9.37721	9.39017	10.0251	10.2107	8.04439	10.1344	9.51767	8.18982	8.77149	8.16491	6.64386	9.15482	7.66534	8.13955	8.99152	7.93664	7.91289	10.6393	7.71425	7.05528	9.29921	9.60548	6.64386	7.76155	6.64386	8.31741	6.64386	7.83289	7.25739	8.26209	6.64386	8.63662	6.64386	8.39232	6.64386	8.45121	9.31288	7.04439	8.24317
D50857_at	7.41785	8.70736	6.64386	8.06609	7.59991	8.68299	6.64386	6.64386	7.02237	8.05528	6.64386	6.67243	6.64386	7.70736	7.24793	6.65821	8.03342	6.64386	7.42626	7.55459	8.04439	7.21917	6.80735	8.16491	7.92481	7.67243	8.82655	7.45943	7.32193	7.88264	6.64386	8.72451	8.80413	8.48784	6.64386	7.18982	8.3966	7.57743	6.84549	7.78136	7.9542	9.05799	7.98299	6.72792	6.91886	7.11894	6.94251	7.61471	7.54689
D50863_at	8.01123	7.46761	7.8009	8.54689	6.64386	6.64386	8.68299	6.64386	6.64386	6.64386	6.64386	6.64386	6.64386	8.51175	8.55842	8.77479	7.86419	6.64386	8.47168	7.46761	6.64386	8.71081	6.64386	6.64386	8.80735	7.8392	8.69349	6.64386	8.57365	6.64386	6.64386	6.94251	8.82018	6.72792	6.64386	6.64386	8.13443	6.64386	6.64386	6.64386	6.64386	9.14975	6.64386	6.64386	6.64386	6.64386	8.55459	7.65105	6.64386
D50911_at	9.49985	9.72451	9.25503	9.31741	9.98584	9.42626	9.46148	8.93664	9.76984	8.9629	8.86419	8.24793	9.55459	9.73302	9.51964	9.53528	9.88264	8.99718	9.66356	8.65821	8.57365	9.97154	9.36851	9.59805	8.58871	8.43879	8.93958	8.37069	9.31967	9.10591	8	9.60918	9.96145	9.61287	9.62753	9.98299	9.54689	9.73302	9.90539	9.56033	9.94544	10.2288	9.62571	8.74147	9.19229	8.76487	9.64205	9.62388	9.72622
D50912_at	9.24079	8.46761	7.8009	8.3443	9.41363	8.09803	8.78463	7.2854	8.41785	8.43879	8.54303	7.94837	7.76155	7.89482	9.18735	8.56986	7.49985	8.30834	8.29462	7.32193	6.64386	8.69697	7.77479	6.64386	8.08746	7.56986	6.71425	6.64386	8.15987	8.31741	7.72792	8.31288	9.01402	7.89482	8.224	8	8.69349	8.49985	8.44294	8.57743	8.97728	8.82018	9.01402	8.12412	8.70736	8.24317	9.10591	8.3837	9.21189
D50913_at	6.64386	6.64386	8.64024	10.4419	8.61471	9.44915	9.24079	10.0875	7.20945	8.33539	6.64386	8.73132	8.90989	9.224	8.73471	7.64386	9.61839	9.59432	8.55075	8.01681	9.75822	6.64386	6.64386	6.64386	9.27612	8.70736	6.64386	8.50383	6.64386	6.64386	10.0768	8.29002	10.4325	9.7039	8.72451	6.64386	9.54689	9.67066	8.71768	8.9571	6.64386	7.52356	9.81378	7.8009	7.81378	8.29002	9.77808	9.36851	7.29462
D50914_at	7.87036	7.54689	8.83289	7.06609	7.70044	7.93664	8.90689	6.9542	7.20945	9.07948	8.36632	7.69349	7.19967	6.64386	9.26444	8.7879	6.64386	9.67243	7.6865	6.70044	6.93074	6.64386	6.64386	6.64386	7.97728	7.70044	6.64386	6.64386	7.76818	6.82018	8.0607	8.87652	8.24317	7.6865	6.64386	8.17991	8.08215	7.90087	9.40939	8.06609	8.04985	6.64386	8.21432	7.67243	7.11894	6.64386	9.07682	8.62936	8.65821
D50915_at	8.18982	6.64386	8.59619	6.64386	8.69349	6.64386	9.66534	7.06609	6.64386	7.73471	8.48382	6.64386	7.02237	6.72792	6.64386	6.79442	7.43463	8.84862	6.64386	7.27612	7.14975	7.2384	8.62205	8.65821	6.64386	7.64386	8.74483	6.64386	6.64386	6.64386	8.47573	6.64386	12.8396	7.43463	6.64386	6.64386	6.64386	11.1655	10.5594	6.64386	10.1383	6.64386	7.48382	6.64386	6.64386	6.64386	10.0471	8.29002	8.78463
D50916_at	6.64386	6.64386	6.78136	7.14975	8.20457	6.64386	8.15987	6.64386	6.64386	7.53138	7.06609	6.64386	7.90689	6.64386	9.1472	9.24079	7.31288	7.19967	6.64386	6.64386	6.64386	7.22882	6.64386	7.21917	8.21432	6.64386	6.64386	6.64386	6.64386	6.64386	7.36632	7.9542	6.64386	6.64386	7.86419	6.64386	6.64386	6.64386	8.85487	6.75489	7.82018	6.64386	7.42626	6.64386	7.3837	6.64386	8.02237	8.75822	8.40939
D50917_at	7.12928	8.09276	8.01681	8.19967	8.10329	7.60733	8.37938	8.74819	8.03892	6.64386	6.64386	6.64386	8.21917	8.85487	9.29692	9.08215	9.44501	7.46761	6.6865	6.64386	7.81378	9.86264	8.87652	9.29002	7.94251	8.36632	8.03342	6.64386	7.45121	7.96	8.56986	8.75154	9.75989	8.74819	8.08215	10.1687	8.31741	7.62205	8.47168	8.03892	8.65821	8.86728	8.88264	8.224	8.68299	6.85798	8.21432	8.33092	8.83289
D50918_at	7.19967	9.3443	8.66534	9.93221	9.67596	8.94837	8.85798	6.75489	7.79442	7.65105	8.73809	8.82655	9.22159	9.64566	10.5527	9.24079	9.91588	7.09803	8.40514	9.75489	6.75489	7.45121	6.64386	8.24317	9.36413	8.07146	6.64386	6.64386	9.29921	7.98299	7.49185	8.05528	9.15228	6.64386	10.0334	10.5981	10.5708	8.52748	9.11374	9.71596	9.13186	8.65464	10.7756	9.62753	9.94544	8.00562	9.79116	9.70908	9.04439
D50919_at	6.64386	6.90689	6.64386	6.64386	6.64386	6.64386	6.64386	6.64386	6.64386	6.64386	6.64386	6.64386	6.64386	6.64386	6.64386	7.31288	6.64386	6.64386	6.64386	6.64386	6.64386	6.64386	6.64386	6.64386	8.49586	6.64386	6.64386	6.64386	6.64386	6.64386	6.64386	6.64386	6.9542	6.64386	6.64386	6.64386	8.2384	7.02237	7.34873	6.64386	6.64386	6.64386	7.85798	6.64386	6.64386	6.64386	6.64386	7.70044	7.12928
D50920_at	8.04985	8.30834	8.85798	8.05528	9.41574	6.64386	8.9542	8.61102	9.05799	7.04439	8.81698	8.17991	8.13443	8.55075	9.10066	9.18982	8.49985	8.73471	6.6865	9.20212	7.33985	8.0607	6.93074	6.78136	8.64024	7.25739	7.48382	7.09803	6.64386	7.98299	7.88264	8.52748	9.12412	7.66534	7.31288	8.67596	8.39232	8.48784	8.45533	8.08746	6.64386	6.91886	8.76155	7.85175	8.80413	7.53916	9.27845	8.25267	8.32643
D50922_at	6.64386	6.64386	7.76818	6.64386	8.33092	8.37069	8.22882	7.7879	8.14466	7.59991	7.41785	7.62936	7.01123	6.64386	8.58871	7.35755	6.64386	7.3837	7.59246	8.14975	6.97728	7.92481	7.97154	7.02237	7.75489	6.64386	7.69349	7	6.64386	6.64386	7.40088	8.30378	7.92481	7.17991	8.07146	7.18982	8.30834	6.64386	8.39232	6.64386	8.37069	6.64386	8.3443	6.6865	7.44294	6.64386	8.24317	8.97154	8.45121
D50923_at	6.64386	6.64386	6.64386	6.64386	6.64386	6.64386	6.80735	6.64386	6.64386	6.64386	6.64386	6.64386	6.64386	6.64386	6.64386	6.64386	6.64386	6.64386	6.64386	6.64386	6.64386	6.64386	6.64386	6.64386	6.64386	6.64386	6.64386	6.64386	6.64386	6.64386	6.64386	6.64386	6.64386	6.64386	6.64386	7.76155	6.64386	6.64386	6.64386	6.64386	6.64386	6.64386	6.64386	6.64386	6.64386	6.64386	7.36632	6.64386	6.64386
D50924_at	7.65821	6.64386	6.64386	7.04439	8.09276	7.79442	6.64386	6.64386	6.64386	6.64386	6.64386	6.64386	6.64386	7.18982	7.77479	7.18982	7.10852	6.64386	6.94251	6.64386	6.64386	7.27612	6.88264	7.02237	6.64386	6.64386	7.93074	6.87036	6.70044	6.64386	6.64386	7.41785	7.94251	6.64386	7.58496	6.65821	7.82018	7.6865	6.82018	7.34873	7.01123	7.93664	7.11894	7.43463	6.91886	6.64386	7.5157	7.32193	7.26679
D50925_at	8.47978	7.31288	8.57365	6.89482	8.24793	7.85798	7.90087	8.19476	7.62205	7.36632	7.34873	6.83289	8.49185	8.50383	7.30378	8.07146	7.15987	7.96	7.50779	6.9542	6.64386	8.15987	8.3966	7.96	7.94837	7.75489	6.64386	7.66534	7.76818	7.88264	8.04985	7.99435	7.64386	6.96578	7.65821	7.88264	8.82972	8.21432	7.89482	7.85798	7.33985	8.90989	8.12928	7.98299	7.40939	8.01123	8.01123	8.23362	7.81378
D50926_at	7.65821	8	9.06609	8.74147	10.5718	7.86419	7.94837	8.85487	7.8009	8.43463	7.26679	7.41785	8.40088	8.67596	9.16742	9.62022	8.64746	7.3837	6.64386	7.98868	7.03342	9.43254	7.90087	7.3837	8.06609	6.70044	7.11894	8.224	7.37504	6.64386	8.30834	8.51964	9.47168	8.55842	8.34873	7.87036	7.88874	8.56224	8.27146	6.64386	7.67243	7.85798	7.69349	7.35755	8.26209	8.82972	9.76155	8.69	7.91886
D50927_at	6.64386	8.19967	7.83289	8.66888	9.93074	6.89482	8.12928	7.94837	7.46761	7.67948	7.83289	7.06609	7.49185	7.92481	9	9.09011	9.19967	6.64386	6.64386	7.83289	6.85798	7.93664	7.93664	8.05528	8.39232	6.67243	6.64386	6.96578	6.64386	7.43463	7.77479	8.15482	8.79442	7.33985	7.93074	9.11634	8.27146	8.11894	8.53528	7.75489	7.24793	7.11894	8.13955	7.16993	7.97728	7.02237	9.62022	8.224	8.07146
D50928_at	6.64386	6.64386	7.76155	6.64386	7.44294	8.73132	8.44708	7.06609	8.10329	6.64386	9.18982	8.05528	8.92778	8.60363	8.3966	8.79766	6.64386	8.93958	6.64386	8.64746	6.64386	9.20701	6.64386	8.31741	8.00562	7.93664	9.20457	8.29921	7.65105	7.18982	7.74819	8.87036	6.71425	7.73471	6.64386	8.3837	8.61839	8.69349	6.64386	8.47978	9.13186	7.88264	6.64386	8.01123	6.64386	6.64386	7.44294	6.64386	8.26679
D50930_at	9.66711	9.07948	8.90087	8.59991	10.0224	9.75822	9.98726	7.59991	7.08746	9.34207	9.02791	6.94251	8.71425	9.21675	10.42	9.64205	7.2384	9.48382	9.78136	9.93074	8.72451	9.84235	7.90087	9.35094	7.59246	7.27612	9.25739	7.82018	8.03342	6.64386	8.29921	9.07414	9.92926	8.02791	9	9.37938	10.1812	10.0014	9.61655	9.17243	10.0701	9.75154	10.1447	9.17991	9.11374	8.09276	10.8368	9.26209	11.0112
D50931_at	6.64386	7.09803	6.64386	7.71425	6.64386	6.64386	8.87036	6.64386	6.64386	6.98868	6.64386	6.64386	6.64386	6.64386	8.74147	6.64386	6.91886	6.64386	6.64386	6.64386	6.64386	6.64386	6.64386	6.72792	6.64386	6.64386	6.64386	6.64386	6.64386	8.29002	6.89482	6.64386	6.64386	8.81698	6.64386	6.64386	6.64386	7.53138	6.64386	6.64386	6.64386	6.64386	6.64386	6.64386	6.64386	6.64386	6.64386	6.64386	6.64386
D55638_at	6.64386	7.08746	6.64386	6.64386	6.64386	6.64386	6.64386	6.64386	6.64386	6.64386	6.64386	6.64386	6.64386	6.64386	6.64386	6.64386	6.64386	6.64386	6.64386	7.09803	7.65821	6.64386	6.64386	6.64386	6.64386	6.64386	6.64386	6.64386	6.64386	6.64386	6.64386	6.64386	8.74147	6.64386	6.64386	6.64386	6.64386	6.64386	6.64386	6.64386	6.64386	6.64386	6.64386	6.64386	6.64386	6.64386	6.64386	6.64386	6.64386
D55640_at	9.78953	9.85019	8.67948	7.94837	8.89785	10.0279	8.74147	7.58496	8.82972	6.64386	6.64386	6.64386	8.91289	8.55842	8.63662	8.69	8.08215	8.70044	9.52356	6.64386	8.92778	9.58684	6.64386	10.0098	9.47776	8.96867	9.62753	8.86419	9.02237	8.99152	8.42206	10.1724	10.0782	9.29232	9.63118	9.03617	9.72792	9.67419	7.99435	9.46964	9.70217	9.47168	8.53916	9.14975	8.10852	6.64386	8.82018	9.18982	8.59619
D55654_at	9.8857	9.90689	8.88264	10.5746	11.4757	10.42	10.7013	9.63118	10.3174	10.2562	9.24317	10.3343	9.11114	9.52552	11.5464	10.7903	8.98299	10.0701	9.74315	9.49386	10.0251	9.41151	9.8933	10.2312	11.3476	9.41996	9.0607	10.7056	9.61471	9.73471	10.1357	10.821	9.66178	10.128	10.0954	11.0587	11.4808	11.041	11.7773	10.7665	10.6202	8.12928	11.9024	10.6698	10.9535	9.76487	10.8361	10.8986	11.464
D55696_at	6.64386	9.10591	6.64386	8.90388	6.64386	6.64386	6.64386	6.64386	6.64386	6.64386	6.64386	6.64386	7.53138	6.64386	7.85175	6.64386	6.64386	6.64386	6.6865	6.64386	6.64386	6.64386	8.42206	6.64386	6.64386	6.64386	8.93074	6.64386	6.64386	7.76818	6.64386	6.64386	6.64386	6.64386	7.59991	6.64386	7.98868	6.80735	6.96578	7.65821	6.80735	6.64386	6.79442	6.64386	6.64386	7.17991	6.64386	6.64386	7.86419
D55716_at	10.0362	10.0307	10.2432	10.3998	10.5736	10.7674	11.6511	10.0715	11.7181	10.5527	9.76487	9.48382	8.41785	9.89026	10.5755	9.15482	9.31967	10.3476	11.2222	11.1105	8.77808	10.5868	9.40301	9.44294	10.6284	9.04985	9.97154	9.5157	9.03892	9.2503	10.9887	9.74651	10.268	9.44087	10.1997	10.1124	11.5887	10.6366	10.7985	11.4205	10.0701	10.1319	11.7661	10.5878	10.7895	9.18735	10.9922	10.3891	11.4305
D56495_at	8.76818	8.96578	8.20457	8.60733	8.15987	9.0607	8.01681	8.51175	7.91289	9.59246	7.65821	8.20457	7.96	7.88874	8	8.47168	7.66534	8.62205	9.12412	8.04439	8.56605	8.15987	8.99435	9.06609	8.67243	8.3837	8.93074	8.2854	8.43463	9.24317	7.45943	9.16742	9.45533	8.87652	9.35755	8.224	8.85798	8.27612	7.84549	8.18488	8.5812	9.16491	9.17243	8.29462	8.08746	7.58496	8.00562	8.04439	7.6865
D59253_at	6.64386	6.64386	6.6865	6.64386	7.04439	6.64386	7.09803	7.83289	8.12928	7.79442	7.93664	6.64386	6.64386	6.64386	8.0607	8.31288	7.09803	6.64386	6.82018	6.64386	6.64386	6.82018	7.37504	7.11894	6.64386	6.64386	6.64386	6.64386	6.64386	6.64386	6.64386	6.64386	6.64386	6.64386	6.64386	6.64386	6.64386	8.02791	8.41785	7.6865	6.64386	6.64386	6.78136	6.83289	6.64386	6.64386	6.84549	6.79442	8.34873
D61380_at	9.92184	10.2204	10.3554	11.6795	12.1981	10.5953	11.421	10.4168	11.2402	10.9241	10.0941	10.9614	10.1098	10.6055	11.9993	11.5396	10.6421	11.1299	10.8895	9.66178	11.5864	9.91886	10.5236	10.5018	11.9578	10.69	10.1434	11.236	9.74147	11.1312	11.4553	11.5732	9.70908	11.0607	9.91588	10.4522	11.2479	10.9462	11.9204	10.6768	9.64926	9.48784	11.8142	11.7536	10.9658	10.6393	11.5211	11.5008	11.9005
D61391_at	6.64386	7.92481	6.64386	7.59246	9.76487	6.64386	6.64386	7.96	7.11894	7.96	7.58496	6.64386	6.64386	6.64386	8.83605	8.69	6.64386	6.64386	6.64386	6.64386	6.64386	6.64386	6.64386	6.64386	6.64386	6.64386	9.01123	7.41785	6.64386	6.64386	6.64386	6.64386	6.64386	6.64386	6.64386	6.64386	6.64386	6.64386	8.13443	6.64386	6.64386	8.47168	6.64386	6.64386	6.64386	6.64386	9.25503	6.64386	7.89482
D63134_at	6.64386	6.64386	6.64386	6.64386	6.64386	6.64386	6.64386	6.64386	6.64386	6.64386	6.64386	6.64386	6.64386	6.64386	6.64386	6.64386	6.64386	6.64386	6.64386	6.64386	6.64386	6.64386	6.64386	6.64386	6.64386	6.64386	6.64386	6.64386	6.64386	6.64386	6.64386	6.64386	6.64386	6.64386	6.64386	6.64386	6.64386	6.64386	6.64386	6.64386	6.64386	6.64386	6.64386	6.64386	6.64386	6.64386	6.64386	6.64386	6.64386
D63135_at	8.69697	7.61471	6.64386	7.54689	8.65105	8.00562	6.64386	7.16993	6.64386	6.64386	7.79442	6.76818	7.55459	7.94837	6.71425	6.64386	7.85175	6.64386	7.50779	6.64386	7.40939	7.56224	8.0607	8.07682	6.76818	6.64386	8.44708	6.64386	7.8392	7.10852	6.64386	8.52748	8.74147	8.17493	7.47573	7.87036	8.50383	7.48382	6.64386	6.64386	7.89482	8.5812	7.41785	7.10852	6.64386	7.40088	7.30378	8.28077	7.45943
D63160_at	8.43879	7.34873	6.64386	7.27612	8.95128	8.65464	6.87036	7.04439	7.32193	8.18488	6.84549	8.02791	7.67948	8.42206	6.64386	7.09803	7.15987	7.59991	8.64024	6.64386	8.89178	8.77149	8.27146	9.00282	8.71081	8.21917	8	6.64386	8.37938	7.82018	6.64386	8.09276	6.64386	6.64386	8.73809	6.64386	9.09276	8.43879	7.82018	7.74819	9.43671	8.92184	9.11634	7.52356	6.64386	7.7879	7.94251	8.224	7.37504
D63390_at	8.3966	6.88264	7.30378	7.44294	6.84549	6.64386	6.64386	7.13955	6.64386	6.64386	6.64386	6.64386	6.64386	7.62936	7.29462	6.64386	6.64386	6.64386	7.33985	6.64386	7.27612	6.64386	6.64386	6.64386	6.72792	6.64386	8.2854	6.64386	6.64386	6.64386	6.64386	6.64386	6.98868	6.64386	6.64386	6.67243	9.01123	6.64386	6.64386	6.9542	6.64386	7.59991	6.98868	6.72792	6.74147	6.64386	6.64386	8.03892	6.64386
D63391_at	8.45121	6.64386	6.64386	6.64386	6.64386	6.64386	8.81378	8.42206	6.64386	6.64386	6.64386	6.64386	6.64386	6.64386	6.64386	6.64386	6.64386	6.64386	6.64386	6.64386	6.64386	6.64386	6.64386	6.64386	6.64386	6.64386	6.64386	6.64386	6.64386	6.64386	7.04439	6.64386	6.64386	6.79442	7.89482	6.64386	8.79116	6.64386	6.79442	8.36632	6.64386	6.64386	9.60363	8.09803	9.05528	6.64386	7.67948	6.64386	8.65464
D63412_at	6.64386	6.64386	6.64386	6.64386	6.64386	6.64386	6.64386	6.64386	6.64386	6.64386	6.64386	6.64386	6.64386	6.64386	6.64386	6.64386	6.64386	6.64386	6.64386	7.36632	6.64386	6.64386	6.64386	6.64386	6.64386	6.64386	6.64386	7.16993	6.64386	6.64386	6.64386	7.35755	6.64386	6.64386	6.64386	6.64386	6.64386	6.64386	6.64386	6.64386	6.64386	6.64386	6.64386	6.64386	6.64386	6.64386	6.64386	6.64386	6.64386
D63475_at	9.8857	8.0607	10.1396	10.2703	10.6653	9.77149	9.99435	9.9542	9.16993	9.21189	9.75989	9.45533	10.1636	10.4543	11.7389	11.2088	9.40301	10.0444	9.72622	9.9629	10.8494	10.2408	9.11114	10.0238	10.4635	9.18735	10.0112	8.58871	9.30378	10.1176	10.0993	11.463	9.58308	9.03617	9.94251	10.7389	10.5546	9.75154	10.9586	9.52943	10.0307	9.23122	11.6786	10.0607	9.36632	8.83289	10.5028	10.3696	10.5632
D63476_at	9.19476	9.72962	10.2515	9.37938	10.1331	9.90238	9.29002	9.62571	9.34207	8.60363	9.0607	8.90087	9.42836	9.80896	10.2842	9.97728	10.633	9.0607	10.3129	9.18982	8.17493	10.4645	10.2597	10.1202	9.33539	8.37504	9.53333	8.36194	9.47168	9.02791	8.41363	9.8392	10.8178	9.61287	10.4471	10.9159	10.4147	9.48784	9.8392	9.69697	9.74987	9.98299	10.1712	9.17742	10.5517	10.0279	9.81218	9.01681	9.67772
D63477_at	6.64386	7.46761	6.64386	7.85175	9.02237	7.07682	7.88264	6.80735	7.53138	7.31288	6.79442	6.64386	6.64386	8.36194	8.51964	7.83289	6.64386	6.64386	6.64386	7.66534	6.70044	9.03617	6.97728	6.64386	8.31741	6.64386	6.64386	7.39232	6.64386	6.64386	6.89482	8.73132	7.74147	8.40939	7.90689	6.76818	7.70044	8.21432	8.27146	6.64386	8.12928	6.64386	7.45121	6.79442	6.64386	6.64386	8.84235	7.62936	8.56986
D63478_at	9.66711	9.18239	9.8933	9.61287	9.53722	10.1215	9.01681	8.90087	7.65105	7.97154	7.63662	8.21432	9.16993	9.68825	9.17493	9.37504	10.0417	9.44294	9.46148	9.62571	6.64386	10.6511	9.78953	9.81698	10.058	8.71425	9.97585	9.06878	9.5411	9.66178	8.93958	10.1849	10.749	9.56415	9.56986	9.52748	10.5314	9.89785	9.87958	9.32867	8.82018	10.0014	10.2586	8.99435	10.4696	9.02237	9.59991	10.0293	9.87652
D63480_at	6.64386	7.69349	7.55459	7.97728	8.43045	6.64386	7.2384	6.64386	6.64386	6.78136	7.01123	6.64386	6.64386	6.64386	8.06609	7.53916	6.64386	7.06609	7.88264	7.32193	8.2854	6.64386	7.08746	6.88264	8.01123	7.47573	7.87036	7.98299	7.75489	6.64386	7.17991	9.37938	9.26444	8.47573	7.35755	7.2384	7.16993	7.97728	7.80735	6.64386	8.16491	7.40939	8.08215	6.64386	6.64386	6.64386	8.39232	8.25739	7.2384
D63481_at	9.70563	8.74147	9.72622	9.0634	9.13186	8.99435	9.68475	9.42836	9.35755	9.2384	9.62388	8.32643	9.10591	9.19229	9.49586	9.93517	9.04439	8.85798	9.69	9.17243	7.41785	10.1306	8.96	7.99435	9.72451	9.03892	9.20457	9.03067	9.46761	7.90087	7.94837	9.31515	9.91737	7.98868	9.86264	9.00843	10.0238	8.64746	9.37721	9.0634	8.98014	9.84862	9.72281	7.6865	8.74819	7.67948	9.94398	9.41363	9.40301
D63482_at	7.47573	6.64386	6.64386	9.09276	8.92184	7.11894	8.04439	6.64386	7.85175	8.37069	7.2384	7.09803	7.24793	8.3443	9.35755	9.13955	8.64746	6.64386	7.82018	9.14466	6.64386	7.70736	6.64386	8.31288	8.30378	8.14466	7.01123	8.47168	7.55459	7.93074	6.64386	8.90689	9.36194	9.18735	8.53138	8.74147	8.44294	8.71081	8.31741	7.59246	8.09276	7.40088	7.37504	6.79442	7.49185	7.45943	8.44294	7.91886	7.71425
D63483_at	6.64386	6.64386	6.78136	7.42626	7.72792	7.43463	6.64386	6.64386	6.64386	6.64386	7.39232	6.64386	6.64386	6.71425	7.7879	7.60733	6.64386	6.64386	6.64386	7.46761	6.64386	6.64386	6.64386	6.64386	6.64386	7.07682	7.08746	6.64386	6.80735	6.64386	6.64386	6.64386	8.41363	6.64386	6.83289	6.78136	6.64386	6.64386	6.64386	6.64386	6.64386	6.88264	6.76818	6.64386	6.64386	6.64386	8.26209	6.64386	6.64386
D63484_at	6.64386	6.64386	6.64386	6.64386	6.64386	6.64386	6.64386	6.64386	6.64386	6.64386	7.97728	6.64386	6.64386	6.64386	6.64386	6.64386	6.64386	6.64386	6.64386	6.64386	6.64386	6.64386	7.39232	6.64386	6.64386	6.64386	6.64386	6.64386	6.64386	6.64386	6.64386	6.64386	6.64386	6.64386	6.64386	6.64386	6.64386	6.64386	6.64386	6.64386	6.64386	6.64386	6.64386	6.64386	6.64386	6.64386	6.64386	6.64386	6.64386
D63485_at	10.0154	10.2515	9.17991	9.64024	9.66534	10.8665	9.05528	8.93664	9.13186	8.59991	8.42206	9.32193	9.49785	9.22641	9.76818	9.59059	9.14211	9.34651	9.95274	9.46352	9.61471	10.2656	9.35975	10.0279	9.87805	9.12412	10.6073	9.18735	10.1898	9.38586	8.49985	10.2444	11.3009	9.41996	9.87805	9.633	10.3531	9.50581	9.09276	9.53722	10.1687	10.4083	10.0728	9.59805	9.54303	9.22641	9.61655	10.0901	8.62571
D63486_at	8.63662	7.31288	8.69	9.96578	9.16993	10.5812	9.07948	8.34873	9.18982	8.3837	7.78136	7.11894	6.64386	6.64386	9.53138	8.82337	7.7211	8.53528	9.58308	8.97441	8.15482	8.54303	6.64386	6.64386	10.927	8.60363	8.03342	10.1176	9.43254	7.47573	8.44708	7.53138	9.36194	8.66888	9.15735	8.82337	9.71939	9.76818	9.37938	9.57743	10.2831	9.89482	9.79116	7.03342	8.78136	7.70044	9.21675	9.46761	9.64566
D63487_at	8.03892	6.64386	8.59991	8.89785	8.85487	10.6874	9.08481	9.02514	8.69697	6.64386	8.37504	9.32867	8.67596	6.64386	9.50184	7.62205	8.42206	9.55651	9.38586	9.27612	8.54303	9.18982	7.96	9.12928	9.46352	8.61102	8.5812	9.37938	9.73302	9.11894	9.62205	8.88874	6.64386	6.64386	7.72792	9.49985	8.73132	9.73302	9.44501	8.93664	9.32193	9.08746	8.96578	6.64386	7.48382	8.53916	8.8857	9.75489	8.94251
D63506_at	6.64386	9.11374	7.88264	9.07682	9.87191	8.79116	9.20701	8.3837	7.64386	8.18488	7.86419	7.46761	7.67243	7.89482	9.47978	8.67596	7.90087	8.35315	8.62936	7.5157	7.52356	8.67243	8.59246	8.40939	9.13186	7.88874	8	7.97728	8.84235	7.43463	7.24793	9.95565	9.85643	9.36632	8.78463	9.03342	8.33092	8.81698	9.14466	7.7211	8.75154	8.90989	8.17493	7.59991	7.78136	6.97728	9.33539	8.77479	8.45533
D63813_at	8.04985	8.34873	6.64386	8.3443	6.70044	8.37938	6.64386	6.64386	6.64386	6.64386	7.07682	6.76818	6.64386	6.64386	6.71425	6.64386	6.64386	6.74147	7.8392	6.72792	6.64386	7.05528	6.72792	7.56986	8.17493	6.64386	7.91289	6.64386	7.63662	7.13955	6.64386	7.33985	7.10852	6.82018	6.98868	6.64386	7.98299	7	6.64386	6.64386	7.52356	6.64386	7.46761	6.87036	6.64386	6.64386	6.64386	6.9542	9.96723
D63851_at	9.64205	9.19229	8.96867	8.41785	9.10329	10.4378	7.70044	8.61102	8.6865	8.52356	8.16993	8.7039	8.24317	8.93369	7.96	8.61839	7.78136	8.61102	9.28309	8.49185	8.40088	9.47573	9.10066	8.78136	8.99718	8.56605	9.44708	9.05257	9.63844	8.76818	7.41785	9.19967	9.67596	8.25267	9.10066	8.51964	8.92481	8.78463	8.50383	8.83289	8.89178	8.69697	9.10066	8.62936	8.13955	8.35315	8.58871	8.32643	7.40939
D63874_at	12.4833	11.7134	12.7883	13.0818	13.5196	12.879	13.0046	12.1908	12.6924	11.7104	11.5177	11.9304	11.3842	13.0012	13.247	12.7889	12.2647	12.8605	12.654	11.7528	11.7883	12.1605	11.2473	11.2076	12.9285	11.3869	11.0154	12.2372	12.0821	12.1124	12.1183	12.3318	12.8258	12.3611	12.0213	13.4965	13.5657	13.0505	13.2251	12.3759	12.6142	12.1567	13.2965	12.8126	12.7775	11.9787	13.6573	12.6784	13.4901
D63875_at	7.35755	8.12412	7.47573	8.37504	9.26913	7.70736	8.62936	8.25267	8.14466	8.41785	7.32193	6.64386	7.40088	8.00562	8.55459	8.74147	7.41785	7.01123	8.0607	7.24793	7.22882	8.44294	7.69349	7.31288	7.96578	6.64386	7.67243	7.59246	7.75489	7.2854	7.47573	8.79442	8.13443	8.2854	7.97728	8.22882	8.2854	8.56605	8.92778	7.48382	7.62936	8.61471	8.33985	7.20945	8.52356	7.14975	8.56605	9.19967	8.33985
D63876_at	9.75489	9.55459	9.10329	9.37938	9.96434	9.50581	9.59432	9.73978	9.42206	9.82496	9.44708	8.61102	9.44501	9.3015	10.4696	10.3242	8.83605	9.65821	9.18982	9.45943	8.92778	9.31515	8.97154	9.70908	9.89785	8.72792	10.2009	9.47168	9.2738	9.46557	8.66534	10.3287	10.7895	10.7607	9.07682	9.6987	10.4242	9.60918	8.86419	9.57175	9.37069	10.0848	9.87344	7.12928	9.20945	8.37938	10.0056	9.58308	9.92926
D63877_at	10.0526	8.38802	7.97154	8.25739	9.13186	9.56415	8	7.40939	8.14975	8.56224	7.67948	6.64386	8.35315	8.49985	8.62936	8.75489	7.78136	8.44708	7.97728	8.19967	7.82655	8.67948	8.20457	9.06609	8.68299	8.61102	9.24079	7.8009	8.7211	7.77479	6.87036	8.9542	9.57743	8.81698	9.54689	8.90689	10.0485	8.56986	8.24793	7.30378	8.2384	8.73809	8.94837	8.48382	8.52356	6.64386	8.57365	8.82018	8.35755
D63878_at	9.23122	9.91588	9.28309	10.7541	10.927	10.1874	10.3826	10.0224	10.0593	9.75822	9.20457	9.45738	9.71253	10.3783	10.6715	9.99294	10.6564	9.62205	9.45121	9.2384	9.28771	11.6073	10.4818	11.3399	10.9069	9.23122	9.49785	9.96145	9.72622	10.021	10.1523	11.2871	11.1886	11.2871	10.0042	10.7322	10.7846	10.4574	10.4522	10.0126	9.64024	10.2131	11.3982	9.99294	9.23362	9.11894	10.3587	10.7764	10.8971
D63879_at	8.53528	7.33092	7.34873	8.66178	8.19967	7.63662	7.82018	8.19476	6.64386	6.64386	6.64386	6.64386	8.87036	8.48382	8.04985	8.75489	8.02237	7.16993	7.87036	7.11894	6.64386	8.17493	6.64386	7.64386	9.35975	6.87036	7.48382	8.5812	6.64386	8.49985	7.85798	7.56224	7.2384	6.79442	8.05528	7.40088	8.08746	7.67948	8.26679	7.48382	7.90689	6.64386	7.30378	6.79442	7.72792	7.70736	8.53916	8.06609	8.16993
D63880_at	7.37504	6.64386	8.55459	9.53333	9.17742	8.61102	9.75989	9.19476	9.12928	8.85175	8.52356	8.78136	6.82018	6.64386	9.51964	9.09011	6.64386	8.81057	8.94837	9.43254	7.03342	6.64386	7.70736	7.35755	8.38802	8.34873	7.89482	8.74147	6.64386	7.2854	8.44708	8.31288	8.3443	8.37938	9.11894	8.89482	8.96	10.242	9.67948	8.92184	9.51964	7.8009	9.42206	9.49386	9.10591	7.62936	9.10329	9.43879	10.3298
D63881_at	8.43879	9.43254	9.94251	10.1344	10.6591	8.27146	9.51964	8.34873	7.62936	9.14975	8.84549	7.32193	8.87958	9.74651	10.5915	9.71081	9.13186	7.96	7.85175	7.82018	7.49985	9.99435	8.77479	8.58496	8.92778	7.13955	7.64386	7.5157	8.17991	7.59246	8.43045	7.86419	8.43879	7.6865	9.33316	9.96578	9.90839	9.29692	10.1749	7.91289	8.45943	7.15987	10.1497	8.47978	10.2981	7.42626	10.2656	9.82018	9.5216
D63998_at	7.94251	7.61471	6.64386	6.64386	6.9542	7.08746	6.84549	7.16993	6.64386	6.64386	6.64386	6.64386	7.7211	7.65821	6.64386	6.64386	6.64386	6.64386	6.64386	6.64386	6.64386	9.32643	8.17493	7.7211	6.64386	6.64386	6.64386	6.6865	6.64386	6.64386	6.64386	7.06609	6.64386	7.43463	8.17991	7.97154	9.41996	8.03342	7.67243	8.49185	7.96578	6.64386	7.46761	7.21917	9.42206	6.64386	6.64386	8.76155	7.09803
D64109_at	9.01123	9.3443	6.64386	6.64386	8.08746	7.36632	8.48382	7.96	6.64386	6.64386	9.29462	9.35535	7.06609	7.15987	7.92481	8.24317	8.02237	6.64386	7.21917	8.36632	8.37504	6.64386	6.64386	6.65821	8.59246	8.81378	8.03342	7.19967	6.64386	8.79766	8.01123	9.14975	9.51964	8.45943	7.2854	7.87036	6.64386	7.30378	6.64386	6.64386	6.64386	6.64386	6.64386	6.64386	6.64386	6.64386	6.64386	6.94251	8.15482
D64110_at	9.89633	8.82018	9.35755	8.69	6.74147	7.86419	9.0954	8.81057	8	6.64386	8.36632	8.10329	10.5784	10.3977	7.67948	8.53916	8.47978	8.2854	7.08746	7.85175	8.25739	10.4083	9.38586	10.2958	6.84549	8.19967	8.2854	6.79442	10.5651	9.29462	9.68475	8.25267	9.29462	7.96578	8.27612	10.4083	10.0498	8.8392	8.93074	9.43671	9.77808	8.71081	10.151	10.5755	10.7863	8.72451	6.64386	8.89178	8.86109
D64142_at	13.9658	10.0307	12.9099	11.9538	12.5021	12.5051	12.7709	11.9647	12.614	12.5596	11.9005	12.919	12.9155	13.7207	12.7155	12.1963	12.8794	11.1978	11.5541	12.782	11.9629	13.7971	13.4265	13.7837	11.9936	10.6466	11.7339	9.92481	13.7721	13.3319	12.0798	12.1437	12.416	11.5396	12.3309	13.9658	12.9366	12.5023	12.1954	12.8652	12.48	11.6573	13.4819	13.9042	11.2871	12.5784	12.4123	10.9293	12.8941
D64154_at	9.76321	9.49185	8.90388	9.07682	9.08746	9.81378	9.55459	9.45943	9.35755	9.23122	9.633	9.34207	9.18239	9.44501	9.62205	9.64926	9.17243	9.3015	9.45533	9.27612	9.07682	10.1674	9.33762	10.0028	10.0808	9.9571	9.9629	9.15482	10.1649	9.4818	9.42206	9.77972	10.0375	9.95565	9.42206	10.098	10.0362	9.93811	9.16491	9.91737	10	9.39017	10.0389	9.64566	9.73471	9.35755	8.633	9.224	9.82337
D64158_at	8.3966	7.87652	8.48382	8.2384	8.90087	8.48382	7.97728	7.53138	6.75489	7.76155	7.39232	7.81378	6.85798	8.36632	9.15735	8.91588	6.91886	8.27146	8.80735	8.64024	7.36632	8.16993	7.56224	8.54689	7.21917	7.82655	8.79766	7.29462	8.75154	6.64386	7.3837	8.31741	7.49985	6.98868	8.78136	7.78136	8.80413	8.73471	8.75154	8.44294	8.76487	7.85798	8.93369	7.88264	8.10852	6.80735	8.31288	8.29002	8.32193
D64159_at	6.64386	6.64386	6.64386	6.64386	6.64386	6.64386	6.64386	6.64386	6.64386	6.64386	6.64386	6.64386	6.64386	6.64386	6.85798	6.64386	6.64386	6.64386	6.64386	6.64386	6.64386	6.64386	6.64386	6.64386	6.64386	6.64386	6.64386	6.64386	6.64386	6.64386	6.64386	7.5157	8.99152	7.54689	6.64386	6.64386	6.64386	6.64386	7.01123	6.6865	6.64386	6.64386	6.64386	6.64386	6.64386	6.64386	6.64386	6.75489	7.58496
D67029_at	6.64386	7.02237	8.61102	8.51175	8.84549	6.64386	9.06609	8.40088	7.50779	6.64386	7.54689	6.64386	7	8.09803	8.67596	8.30378	8.21917	7.16993	7.16993	6.70044	6.64386	9.19229	6.64386	8.39232	7.54689	6.64386	6.64386	7.53138	8.57365	6.6865	6.94251	8.84235	8.00562	8.57743	7.12928	8.70044	6.94251	7.50779	8.40514	6.64386	7.59246	7.63662	7.8009	6.64386	8.74483	7.21917	8.67948	6.64386	8.2384
D70830_at	6.64386	6.64386	6.64386	6.64386	6.64386	6.64386	6.64386	6.64386	6.64386	6.64386	6.64386	6.64386	6.64386	6.64386	6.64386	6.64386	6.64386	6.64386	6.64386	6.64386	6.64386	6.64386	6.64386	6.64386	6.64386	6.64386	6.64386	6.64386	6.64386	6.64386	6.64386	6.64386	6.64386	6.64386	6.64386	6.64386	6.64386	6.64386	6.64386	6.64386	6.64386	6.64386	6.64386	6.64386	6.64386	6.64386	6.64386	6.64386	6.64386
D76435_at	6.64386	6.64386	6.64386	6.64386	6.64386	6.64386	6.64386	6.64386	6.64386	6.64386	6.64386	6.64386	6.64386	6.64386	6.64386	6.64386	6.64386	6.64386	6.64386	6.64386	6.64386	6.64386	6.64386	6.64386	6.64386	6.64386	6.79442	6.74147	6.70044	6.64386	6.64386	6.64386	7.12928	6.64386	6.64386	6.64386	6.64386	6.64386	6.64386	6.64386	6.64386	6.64386	6.64386	6.64386	6.64386	6.64386	6.64386	6.64386	6.64386
D76444_at	6.64386	6.64386	7.72792	7.8392	8.0607	6.64386	6.84549	6.64386	6.64386	6.64386	6.64386	6.64386	7.76818	7.7211	7.08746	7.29462	8.2384	6.64386	6.64386	6.64386	6.64386	8.9571	6.70044	7.96578	6.85798	6.64386	6.64386	6.64386	6.64386	7.41785	6.64386	6.64386	9.21189	6.75489	6.64386	9.13443	6.64386	6.79442	6.6865	6.64386	7.6865	7.09803	6.64386	6.96578	8.11374	6.64386	8.13955	6.64386	7.60733
D78011_at	6.64386	6.64386	6.64386	6.64386	6.64386	6.64386	6.64386	6.64386	6.64386	6.64386	6.64386	6.64386	6.64386	6.64386	6.64386	6.64386	6.64386	6.64386	6.64386	6.64386	6.64386	6.64386	6.64386	6.64386	6.64386	6.64386	6.64386	6.64386	6.64386	6.64386	6.64386	6.64386	6.64386	6.64386	6.64386	6.64386	6.64386	6.64386	6.64386	6.64386	6.64386	6.64386	6.64386	6.64386	6.64386	6.64386	6.64386	6.64386	6.64386
D78012_at	11.1867	9.95274	9.11634	7.88874	9.12928	10.9352	8.43045	9.79928	11.4625	8.69697	8.50383	9.87652	10.0056	10.5821	8.67948	7.90087	7.91886	9.07414	10.6027	9.77149	8.29462	8.66534	9.25974	9.16742	8.21432	9.37504	10.1935	8.87958	10.0661	7.92481	7.76155	8.82337	10.7607	8.43879	11.3971	8.45121	10.2503	9.20457	6.96578	9.3015	10.6202	8.86419	7.91289	8.76818	6.64386	8.68299	8.79766	7.56224	8.66888
D78014_at	7.53138	8.27612	6.64386	6.64386	6.64386	7.55459	8.33092	8.07146	6.64386	7.03342	6.64386	6.64386	7.05528	6.64386	7.61471	6.64386	6.91886	7.06609	7.59246	6.76818	7.01123	9.30378	7.60733	7.84549	6.64386	6.64386	9.25739	6.64386	7.62205	6.80735	6.64386	8.67596	9.02237	6.79442	7.79442	6.64386	8.224	6.64386	6.64386	7.3837	7.7211	8.03342	6.64386	6.89482	6.80735	7.12928	6.64386	7.25739	6.64386
D78129_at	8.56224	7.45121	7.9542	6.64386	8.21432	9.46148	7.83289	7.91886	7.62205	7.79442	7.14975	7.71425	7.9542	8.07682	8.93074	7.90689	7.98868	7.80735	8.87036	7.42626	7.09803	8.96867	8.83289	9.07948	9.03617	7.29462	7.89482	7.63662	9.2384	7.88264	7.17991	8.3443	9.17991	7.33985	6.71425	8.33092	9.633	8.11374	8.53528	8.17493	8.21432	9.33539	9.86109	8.88264	8.81057	7.17991	8.81698	8.81698	7.75489
D78134_at	10.8872	9.93958	10.8439	10.0417	10.6996	10.7398	10.1972	10.2155	11.5774	10.3923	10.1202	9.77808	11.9596	11.9024	11.1966	11.4848	11.544	9.8392	10.058	9.86109	9.53528	12.5367	11.3072	12.1238	9.65642	8.82018	10.4378	9.31288	10.4878	10.4019	10.6211	10.3487	11.2408	10.2082	10.6064	11.9733	11.0007	10.0835	10.3923	11.041	10.5622	10.584	11.2917	10.7797	11.0314	10.1935	10.7099	10.4512	10.611
D78151_at	10.5774	9.89785	10.6502	10.5746	10.683	11.4579	10.4929	10.314	10.7185	10.5536	9.99435	10.2058	10.5324	10.7632	11.0403	10.8297	10.6698	10.6573	10.7674	10.7574	9.99152	11.265	10.5774	10.8258	11.2198	9.92481	10.744	10.2889	11.1	10.4252	10.5641	10.9866	10.6909	10.1421	10.6018	10.5304	10.8353	10.5216	10.9929	10.6502	10.6564	10.6339	11.2336	10.0607	10.2969	10.0901	10.858	10.5372	10.6909
D78156_at	8.03892	6.64386	6.64386	6.64386	7.61471	6.80735	6.65821	6.64386	6.94251	6.64386	6.88264	6.64386	7.20945	7.09803	6.64386	6.88264	6.96578	6.64386	6.84549	7.42626	6.64386	7.43463	7.57743	7.45943	6.64386	6.64386	6.64386	6.64386	6.64386	6.64386	6.64386	6.71425	7.77479	6.64386	7.7211	7.96	8.12412	7.86419	7.58496	7.30378	8.33092	7.48382	6.78136	6.64386	6.64386	7.20945	7.45121	7.45121	6.64386
D78261_at	6.64386	6.64386	6.64386	6.64386	6.64386	6.64386	6.64386	6.64386	6.64386	6.64386	6.64386	6.64386	6.64386	6.64386	6.64386	6.64386	6.64386	6.64386	6.71425	6.64386	6.64386	6.64386	6.64386	6.64386	7.26679	6.64386	6.64386	6.64386	6.64386	6.64386	6.64386	6.64386	6.64386	6.64386	6.64386	6.64386	6.64386	6.64386	6.64386	6.64386	6.64386	6.64386	6.64386	6.64386	6.64386	6.64386	6.64386	6.64386	6.64386
D78275_at	8.55459	7.91289	8.62936	9.2738	10.7322	7.6865	9.25267	8.90689	8.14975	7.49185	7.86419	7.91886	8.79116	8.73471	9.22641	9.80252	9.01123	7.94837	7.56986	7.76818	6.64386	9.46964	7.14975	7.13955	9.05257	8.44708	6.79442	8.21917	8.90087	7.96	8.79766	9.27146	9.00843	8.61839	8.36194	8.81378	8.42206	8.89178	9.95565	7	8.52748	7.62205	8.81378	8.29462	9.09803	7.42626	10.3208	9.14466	9.82018
D78333_at	6.64386	6.64386	6.64386	6.64386	6.64386	6.64386	6.64386	6.64386	6.64386	6.64386	6.64386	6.64386	6.64386	6.64386	6.64386	6.64386	6.64386	6.64386	6.64386	6.64386	6.64386	6.64386	6.64386	6.64386	6.64386	6.64386	6.64386	6.64386	6.64386	6.64386	6.64386	6.64386	6.64386	6.64386	6.64386	6.64386	6.64386	6.64386	6.64386	6.64386	6.64386	6.64386	6.64386	6.64386	6.64386	6.64386	6.64386	6.64386	6.64386
D78334_at	6.64386	6.64386	6.64386	6.71425	6.64386	6.64386	6.64386	6.75489	6.76818	6.64386	6.64386	6.64386	6.64386	6.64386	6.64386	6.64386	6.64386	6.64386	6.64386	6.64386	6.64386	6.64386	6.64386	6.64386	6.64386	6.64386	7.87036	6.64386	6.64386	6.80735	6.64386	6.64386	6.71425	6.64386	6.64386	6.64386	6.76818	6.64386	6.64386	6.64386	6.89482	6.64386	6.64386	6.64386	6.64386	6.64386	6.64386	6.64386	6.64386
D78335_at	6.64386	6.64386	6.64386	8.20945	6.64386	6.64386	9.17991	6.64386	6.64386	6.64386	6.64386	6.64386	6.64386	6.64386	8.96867	7.66534	6.79442	6.74147	6.75489	6.64386	6.64386	7.30378	6.64386	7.06609	7.37504	6.64386	6.64386	6.64386	6.64386	6.64386	7.26679	6.64386	6.64386	6.64386	6.64386	6.64386	9.82972	8.56224	8.02237	7.81378	8.37504	7.05528	7.83289	6.64386	7.76818	6.64386	6.64386	6.64386	8.16491
D78361_at	13.5452	12.5833	13.7598	13.9543	13.75	13.2014	13.8027	13.8274	13.9658	13.4111	13.4086	13.533	13.0637	13.5232	13.6547	13.4091	13.1699	13.5324	12.9118	12.4607	13.9658	13.7811	12.9168	13.7259	13.8851	13.3591	13.3863	13.3202	13.25	13.3283	13.1494	13.9658	13.7047	13.9658	13.2704	13.9658	13.6757	13.8204	13.7404	13.3408	13.6366	12.9869	13.8278	13.2745	12.4202	13.1389	13.5736	13.0137	13.8976
D78367_at	7.31288	7.56986	7.58496	6.64386	8.13955	8.90989	8.14466	6.64386	6.64386	6.64386	7.01123	7	7.37504	8.31741	6.82018	7.59246	7.25739	7.72792	7.31288	7.27612	6.64386	7.83289	6.93074	7.54689	7.87652	7.56986	7.85175	7.61471	8.04439	7.93074	6.64386	8.51964	8.64746	7.41785	7.12928	7.25739	8.65821	8.27612	7.45121	6.64386	8.40514	8.01681	7.08746	7.30378	7.74819	6.96578	7.85798	7.26679	6.96578
D78514_at	6.64386	6.64386	6.64386	6.64386	7.39232	6.64386	6.64386	6.64386	6.64386	6.64386	6.64386	6.64386	6.64386	6.64386	6.91886	7.85798	6.64386	6.64386	6.64386	6.64386	6.64386	6.64386	6.64386	6.64386	6.67243	6.64386	6.64386	6.64386	6.64386	6.64386	6.64386	6.64386	6.64386	6.64386	6.64386	6.64386	6.64386	6.64386	7.61471	6.64386	6.64386	6.64386	6.64386	6.64386	7.04439	6.64386	6.64386	6.64386	6.64386
D78586_at	6.65821	6.64386	7.88874	8.04439	8.79116	8.90087	8.33985	7.86419	7.48382	8.09803	7.71425	6.64386	7.59246	8.27146	9.10329	9.72792	7.33985	8.93369	6.94251	6.64386	6.64386	7.86419	7.26679	6.64386	8.60363	7.2384	8.54689	6.88264	8.89482	6.64386	6.64386	8.29921	6.64386	7.93664	8.20457	8.48784	8.19967	8.29462	9.25739	6.75489	8.29921	6.64386	8.8009	6.64386	8.18488	6.64386	8.64386	8.42626	8.58871
D78611_at	8.08746	7.74819	9.34651	8.73471	9.0634	6.64386	7.43463	6.64386	8.11374	6.64386	7.43463	6.64386	8.40088	9.15735	6.64386	8.93958	6.64386	6.64386	6.64386	6.64386	6.88264	6.85798	6.64386	6.64386	6.64386	8.8009	8.48382	8.16491	10.8226	10.2761	10.4502	7.48382	7.75489	6.64386	8.37504	6.64386	9.75154	6.96578	7.7211	6.64386	6.64386	6.64386	11.1805	9.92333	9.20457	9.41363	6.64386	6.64386	6.64386
D79205_at	13.9658	13.9658	13.9658	13.9658	13.9658	13.9658	13.9658	13.9576	13.9658	13.9658	13.9658	13.9658	13.9658	13.9658	13.9658	13.9658	13.9658	13.9658	13.9658	13.9658	13.9658	13.9658	13.9391	13.9658	13.9658	13.9658	13.9658	13.8247	13.9658	13.9658	13.9397	13.9658	13.9658	13.9658	13.9658	13.9658	13.9658	13.9658	13.9658	13.5418	13.9396	13.6793	13.9658	13.9658	13.9658	13.9658	13.9658	13.9658	13.9658
D79983_at	6.64386	7.27612	6.64386	6.71425	7	6.64386	6.64386	6.64386	6.64386	6.64386	6.64386	6.64386	6.64386	6.64386	6.87036	6.79442	6.64386	6.64386	6.78136	6.64386	6.64386	6.64386	7	6.91886	7.04439	6.64386	6.64386	6.64386	6.64386	6.64386	6.64386	6.72792	8.71425	6.64386	7.05528	7.78136	8.29462	7.6865	7.19967	6.9542	6.83289	6.64386	7.91886	6.64386	6.64386	6.67243	6.64386	6.64386	6.6865
D79985_at	6.64386	6.64386	6.64386	6.64386	6.64386	6.64386	6.64386	6.64386	6.64386	6.64386	6.64386	6.64386	6.64386	6.64386	6.64386	6.64386	6.64386	6.64386	6.64386	6.64386	6.64386	6.64386	6.64386	6.64386	6.64386	6.64386	6.64386	6.64386	6.64386	6.64386	6.64386	6.64386	6.64386	6.64386	6.64386	6.64386	6.64386	6.64386	6.64386	6.64386	6.64386	6.64386	6.64386	6.64386	6.64386	6.64386	6.64386	6.64386	6.64386
D79986_at	9.94251	9.64386	11.4691	9.90689	11.2825	9.56796	10.2738	9.56796	9.29921	9.67066	9.74315	9.10852	11.0098	11.2282	11.1267	11.4594	11.3515	9.14466	9.45121	8.84549	8.43045	11.8599	10.4998	10.7406	9.89936	8.39232	8.85487	7.61471	10.043	9.44294	10.4409	9.69	10.5206	9.94983	10.2668	11.1267	10.9009	10.0941	10.7398	9.75989	9.88722	10.014	11.1434	10.363	11.6755	9.55651	11.0788	10.3934	10.4767
D79987_at	6.64386	6.64386	6.64386	6.64386	6.64386	6.64386	8.35315	6.64386	6.94251	6.64386	6.64386	6.64386	6.64386	6.64386	6.64386	6.64386	6.64386	6.64386	6.64386	6.64386	6.64386	6.64386	6.64386	6.64386	6.64386	6.64386	6.64386	6.64386	6.64386	6.64386	6.64386	6.64386	6.64386	6.64386	6.64386	6.64386	6.64386	6.64386	6.64386	6.64386	6.64386	6.64386	6.64386	6.64386	6.64386	6.64386	6.64386	6.64386	6.64386
D79988_at	6.64386	7.61471	7.10852	6.94251	9.50779	6.64386	8.84549	8.51964	8.88264	6.64386	6.64386	6.64386	6.70044	7.37504	6.64386	6.64386	6.64386	6.64386	6.71425	8.2854	6.64386	6.64386	6.64386	6.64386	7.67243	6.64386	6.64386	6.64386	6.64386	6.64386	6.64386	6.64386	9.49386	6.64386	8.64746	7.22882	6.64386	7.16993	8	8.45943	6.64386	6.64386	7.94251	7.20945	7.49185	7.67948	8.03892	6.64386	7.93074
D79989_at	6.64386	7.44294	7.47573	7.65105	6.64386	7.25739	6.75489	6.64386	6.64386	6.64386	6.64386	6.64386	6.97728	7.79442	8.25267	7.30378	7.48382	6.70044	6.64386	6.64386	6.64386	6.64386	6.64386	6.64386	6.88264	6.64386	8.16491	6.64386	7.58496	6.64386	6.64386	6.64386	8.08215	6.93074	6.64386	6.71425	7.49985	6.64386	6.64386	7.36632	6.64386	6.64386	7.07682	6.64386	7.13955	6.64386	7.08746	6.64386	6.6865
D79990_at	7.94251	8.92481	8.41785	8.2384	9.74819	9.83605	8.77479	7.7211	8.40939	8.12412	7.89482	9	8.51964	9.35315	9.82337	9.65105	9.55651	7.54689	7.6865	7.97154	9.37504	9.44708	8.12412	9.224	7.41785	7.82655	8.7039	7.93074	7.67948	7.77479	6.64386	10.0112	8.94544	10.374	9.51767	8.04439	6.64386	8.38802	9.33539	6.64386	7.98299	7.06609	6.64386	6.64386	6.64386	6.82018	10.0238	8.65105	9.75656
D79991_at	9.52356	9.49785	9.10591	9.31741	9.53138	10.1098	9.56415	9.27612	8.97154	8.65464	9.00843	8.65105	8.79766	9.07414	9.42836	9.32418	8.65821	8.99152	9.30606	9.10066	8.66888	10.1699	9.20701	9.50978	9.76155	9.10329	9.7879	8.87958	9.33985	8.79442	8.39232	9.98726	10.5651	9.32418	9.93221	9.36632	10.4094	9.61839	9.52748	9.51175	9.74483	9.7879	10.1836	9.01959	9.18239	8.78463	9.72622	9.6987	9.40727
D79992_at	8.62571	8.54689	8.45943	8.99435	10.2479	9.24317	9.32418	8.14466	7.8392	7.2854	8.55459	7.40939	7.66534	8.59619	9.27146	8.50383	8.17991	8.12412	8.97728	9.05799	7.04439	9.49185	8.20457	8.17991	8.59246	7.45943	7.83289	7.6865	8.25267	7.2854	8.25739	8.50383	9.91737	7.93664	8.87036	8.77149	9.40514	8.56605	8.38802	8.66178	8.90689	8.67596	8.84862	8.62936	8.17493	7.27612	9.61471	8.76818	8.21432
D79993_at	7.45943	8.15987	7.15987	9.03067	10.5048	8.26209	8.07682	7.46761	7.89482	7.90087	7.90087	7.73471	8.65105	9.98726	9.57365	9.00562	8.82337	7.09803	6.64386	7.8009	6.64386	10.2854	7.40939	8.81698	7.89482	8.02791	8	8.17991	8.93958	8.19476	7.84549	9.43254	10.4767	9.33539	8.88874	7.30378	8.87344	8.76155	8.85487	6.64386	8.82972	8.47168	8.45121	8.19476	8.58871	8.40939	9.3837	8.73132	8.71768
D79994_at	7.43463	8.44294	6.9542	8.19967	8.95128	7.67948	7.47573	7.06609	6.83289	7.26679	6.65821	6.72792	7.02237	6.78136	9.40727	7.60733	6.64386	9.74147	8.16993	8.09803	7.03342	7.93664	7.14975	7.29462	8.15987	7.31288	8.47168	7	7.8392	7.17991	6.64386	6.64386	9.02237	6.65821	7.07682	7.33092	7.88264	8.45121	8.02791	6.64386	10.1536	7.86419	7.62205	7.24793	6.64386	6.64386	7.83289	7.56986	7
D79995_at	7.55459	8.09276	6.64386	7.14975	7.17991	8.73132	6.64386	6.64386	6.64386	6.64386	6.64386	6.64386	6.64386	7.03342	6.64386	6.64386	6.64386	7.59991	8.08746	7.53138	6.64386	8.2384	8.16491	6.64386	7.70044	7.65821	8.86419	6.64386	8.57365	7.47573	6.64386	6.64386	8.93664	6.84549	7.72792	6.64386	8.48382	6.72792	6.80735	6.64386	8.63662	8.44708	8.37069	6.80735	8.02237	6.64386	7.02237	7.60733	6.64386
D79996_at	9.29921	9.31288	8.83605	10.1561	10.7557	9	9.52748	9.19476	9.35094	8.83605	8.64746	8.70044	9.81858	10.4533	10.2597	9.15228	10.2058	8.81057	9.27146	8.89785	6.75489	11.2825	10.1085	10.4325	10.5736	8.13443	8.17991	8.9629	10.6393	8.97441	8.95128	10.3343	11.0967	10.3587	9.44294	10.2252	7.71425	9.49386	10.0901	8.42206	9.51964	9.15735	9.35755	8.24317	10.2992	8.75154	10.1762	9.59059	9.81218
D79997_at	6.64386	6.64386	6.64386	6.64386	7.94837	6.64386	7.40088	6.64386	6.64386	6.64386	6.64386	6.64386	6.64386	6.64386	6.64386	6.64386	6.64386	6.64386	6.64386	7.32193	6.64386	6.64386	6.64386	6.64386	7.34873	6.64386	6.64386	6.64386	6.64386	6.64386	6.64386	6.64386	6.64386	6.64386	6.64386	6.64386	6.64386	6.64386	6.64386	6.64386	6.64386	6.64386	7.19967	6.64386	6.64386	6.64386	8.58496	6.64386	6.64386
D79998_at	6.64386	6.64386	6.64386	6.64386	6.64386	6.64386	6.64386	6.64386	6.64386	6.64386	6.64386	6.64386	6.64386	6.64386	6.64386	6.64386	6.64386	6.64386	6.64386	6.64386	6.64386	6.64386	6.64386	6.64386	6.64386	6.64386	6.64386	6.64386	6.64386	6.64386	6.64386	6.64386	6.64386	6.64386	6.64386	6.64386	6.64386	6.64386	6.64386	6.64386	6.64386	6.64386	6.64386	6.64386	6.64386	6.64386	6.64386	6.64386	6.64386
D79999_at	9.70563	10.128	9.12412	9.36851	9.98014	10.4471	10.0888	8.74819	8.79442	9.73132	8.97154	8.54689	8.90388	8.97154	10.66	9.49185	8.96	9.13186	9.63118	8.37504	8.87036	10.1331	9.43671	10.1523	10.3174	9.42417	9.80735	9.27612	9.72622	8.91289	8.66534	10.5008	11.2621	10.5622	10.1824	9.58308	10.3454	10.374	10.0741	9.75989	10.7482	9.32193	10.2597	8.9571	8.98014	8.79766	9.82972	10.0875	10.0553
D80001_at	6.64386	6.64386	7.40939	8.46352	9.33539	7.40939	8.05528	7.43463	6.64386	6.64386	7.53916	6.64386	6.64386	6.88264	8.87958	9.38154	7.10852	7.62205	7	6.64386	6.64386	6.64386	6.64386	6.64386	8.35315	6.64386	6.64386	7.44294	6.64386	6.64386	6.64386	6.64386	6.64386	6.64386	6.76818	6.64386	6.64386	7.07682	7.81378	6.64386	6.74147	6.64386	6.78136	6.64386	6.64386	6.64386	9.82496	7.78136	8.65464
D80002_at	11.0126	11.3966	9.96	10.3542	10.7574	11.933	10.1948	10.42	10.3219	10.6689	9.88722	9.71425	10.2981	10.4294	9.97154	10.2889	10.151	10.3443	10.8918	9.69	9.79116	11.1743	10.4998	10.6101	10.7339	10.341	10.9965	10.6856	10.544	10.4676	10.0674	11.432	11.8471	10.6952	10.7245	10.585	10.9936	10.8471	10.5765	10.5803	11.2767	11.0974	9.92926	9.97441	10.6839	10.23	10.668	10.8122	10.66
D80003_at	7.04439	6.64386	6.83289	7.62205	8.02237	7.98299	8.17493	8.67243	6.64386	8.15987	8.12928	6.64386	6.64386	6.64386	8.71081	9.11114	7.92481	6.64386	7.54689	6.64386	6.64386	6.9542	6.64386	6.64386	7.06609	6.64386	6.64386	6.64386	6.64386	6.64386	6.87036	6.79442	6.9542	6.90689	7.97154	7.9542	7.27612	6.91886	8.11894	6.64386	7.62936	7.17991	8.46352	6.64386	8.59619	6.64386	8.28077	6.93074	7.99435
D80004_at	7.12928	8.64746	8.04439	8.59991	7.98299	8.32193	9.3837	7.90689	7.46761	8.18982	6.9542	7.91886	6.64386	7.19967	9.83447	7.79442	7.96578	7.24793	6.64386	6.64386	7.44294	10.2396	8.08215	7.74819	8.43463	8.00562	6.67243	7.74819	8.49586	7.5157	7.24793	8.39232	9.96145	9.1472	8.31288	9.65642	8.96	9.10852	9.20701	8.96867	8.18982	6.64386	9.27845	8.04985	7.45943	7.53138	8.46761	9.47776	7.89482
D80005_at	6.64386	9.19967	8.04439	9.91886	9.69523	9.61471	9.69523	9.29232	8.26679	8.77479	7.96	8.56986	6.71425	7.79442	10.5878	9.35315	8.76155	7.76155	8.7039	6.65821	9.08481	8.64386	8.10329	7.91289	10.2456	8.51964	7.75489	8.52748	7.88264	7.84549	7.77479	10.1046	10.1762	10.0566	8.64386	8.94251	9.92035	9.75822	10.2021	9.31741	9.27845	8.92778	10.4221	7	9.44708	7.97728	9.54496	10.1344	10.0238
D80006_at	7.85175	9.20945	9.0634	10.6411	10.5479	8.98868	9.49985	8.27612	9.13186	9.62022	9.05257	6.6865	9.05257	10.1724	10.5812	10.7288	9.48985	7.70736	7.50779	6.93074	8.14975	9.48583	6.64386	6.64386	9.09803	6.64386	6.64386	8.27612	8.37938	6.64386	8.51175	9.55459	8.7211	9.86882	9.16742	10.1911	9.09011	9.48382	10.242	8.79442	8.01123	9.21189	9.62571	7.92481	10.1189	8.20945	10.5324	9.28309	10.4157
D80007_at	9.11634	6.64386	7.45121	8.29921	7.70736	8.09803	7.9542	6.64386	6.64386	7.90087	8.01681	7.08746	7.27612	7.46761	7.98868	9.14211	7.96	9.19476	7.2384	7.98868	6.64386	9.15987	7.44294	7.45121	9.20212	7.82655	8.77479	6.64386	6.94251	6.79442	7.2854	6.82018	8.52356	7.98868	8.82655	8.15987	8.27612	8.54689	8.76818	7.90689	7.96578	8.224	8.24317	7.75489	8.71425	6.64386	8.73132	8.56224	7.97728
D80008_at	7.41785	7.34873	7.25739	8.80413	9.44294	8.56986	8.32193	7.75489	7.49185	7.03342	6.96578	6.64386	6.64386	6.96578	7.74819	6.91886	6.64386	8.03342	8.14466	8.14975	6.64386	7.54689	6.93074	6.64386	8.75154	6.72792	7.67243	7.08746	7.2384	6.88264	7.52356	7.66534	8.28077	6.88264	7.87036	7.81378	7.94837	7.8009	8.15482	7.34873	7.01123	6.64386	8.56986	7.81378	7.42626	6.89482	9.25739	7.74819	8.27612
D80009_at	8.08746	7.12928	6.64386	8.40088	8.96578	6.64386	7.62205	6.64386	7.62936	6.64386	6.64386	6.64386	8.55075	8.77479	8.48784	8.85798	8.43879	6.64386	6.64386	6.64386	6.64386	8.93664	6.64386	6.64386	7.04439	6.64386	6.97728	6.64386	6.64386	6.64386	7.2854	6.64386	8.67596	7.27612	7.53916	7.8392	7.82018	6.64386	8.97728	6.64386	6.64386	6.64386	6.64386	7.14975	8.57743	6.64386	8.96578	7.50779	8.18488
D80010_at	6.64386	7.9542	6.64386	7.08746	7.44294	6.64386	7.45121	6.64386	6.64386	7.31288	6.64386	6.64386	7.01123	7.33985	7.79442	7.91886	6.64386	6.64386	6.64386	6.64386	6.64386	6.88264	6.64386	6.64386	6.64386	6.64386	6.64386	6.64386	6.64386	6.64386	6.64386	6.64386	9.82655	6.64386	6.64386	8.26679	7.29462	6.96578	7.36632	6.64386	7.66534	6.64386	6.64386	6.64386	6.64386	7.33985	7.5157	8.18982	7.50779
D80011_at	6.64386	6.64386	6.64386	6.64386	6.64386	6.64386	6.64386	6.64386	6.64386	6.64386	6.64386	6.64386	6.64386	6.64386	6.64386	6.64386	6.64386	6.64386	6.64386	6.64386	6.64386	6.64386	6.64386	6.64386	6.64386	6.64386	6.64386	6.64386	6.64386	6.64386	6.64386	6.64386	6.64386	6.64386	6.64386	6.64386	6.64386	6.64386	6.64386	6.64386	6.64386	6.64386	6.64386	6.64386	6.64386	6.64386	6.64386	6.64386	6.64386
D80012_at	8.45121	9.69174	8.90989	9.25974	10.5632	9.37069	9.2384	8.9629	6.97728	7.97154	7.77479	8.55842	8.53528	8.9571	10.1176	9.37504	8.88874	8.85798	9.27612	8.99435	8.39232	8.13955	8.93664	9.5216	10.3174	9.3443	7.71425	8.79442	9.78463	6.64386	8.11894	9.9571	10.5498	9.71425	8.9571	9.44708	9.55075	8.59619	10.3432	7.19967	8.98584	8.69697	9.80735	7.56224	9.89026	7.91289	10.0901	9.633	10.2192
D82060_at	6.64386	6.64386	6.64386	7	6.80735	6.64386	6.64386	6.64386	6.64386	6.64386	7.2384	6.64386	6.64386	6.64386	6.64386	6.67243	6.64386	6.64386	6.64386	6.64386	6.64386	6.64386	6.64386	6.64386	7.61471	6.64386	6.64386	6.64386	6.75489	6.64386	7.32193	6.64386	6.6865	6.75489	6.64386	6.64386	6.64386	6.75489	6.64386	6.64386	6.64386	6.78136	6.65821	6.64386	6.64386	6.64386	6.64386	6.64386	6.64386
D82061_at	9.11634	6.84549	9.01959	8.79766	9.01959	8.42626	7.62205	8.29462	7.45943	8.01123	8.29002	6.89482	8.26209	6.64386	8.33092	9.23601	7.61471	7.98868	7.29462	8.94544	6.64386	8.07682	7.54689	8.55459	7.88264	7.93664	10.0741	7.27612	8.45533	6.97728	8.55075	8.01681	9.62753	8.18488	8.50383	9.07146	8.53916	6.64386	8.21432	8.40514	8.20457	8.09803	8.71425	8.85175	8.20945	7.90087	9.45738	9	7.86419
D82070_at	7.60733	8.61839	8.34873	6.97728	7.84549	9.91289	6.80735	6.64386	8.13443	8.17991	6.64386	6.64386	7.78136	6.64386	8.84549	6.64386	7.90087	7.91886	7.97728	6.64386	8.09803	8.23362	8.20457	8.51964	8.73132	8.83605	8.04985	8.10329	8.40939	8.67243	6.72792	7.94837	9.04439	8.71081	8.62571	8.224	9.39874	8.90388	7.65821	6.64386	9.21432	9.24555	9.51175	7.88264	8.70736	9.0954	8.42206	9.04985	7.85798
D82326_at	6.64386	6.64386	7.22882	8.22882	7.36632	6.64386	6.64386	6.6865	7.56224	6.64386	6.64386	6.64386	6.64386	6.89482	6.64386	6.64386	6.64386	6.98868	6.64386	6.64386	7.04439	7.65821	6.64386	8	6.64386	6.64386	7.81378	6.64386	6.64386	7.37504	6.64386	6.64386	6.64386	7.35755	6.64386	6.64386	7.41785	8.17991	7.49985	7.53916	6.64386	6.64386	6.64386	6.64386	6.64386	7.55459	6.64386	6.64386	6.64386
D82343_at	6.64386	6.64386	6.64386	6.64386	6.64386	6.64386	6.64386	6.64386	6.64386	6.64386	6.64386	6.64386	6.64386	6.64386	6.64386	6.64386	6.64386	6.64386	6.64386	6.64386	6.64386	6.64386	6.64386	6.64386	6.64386	6.64386	6.64386	6.64386	6.64386	6.64386	6.64386	6.64386	6.64386	6.64386	6.64386	6.89482	6.64386	6.64386	6.64386	6.64386	6.64386	6.64386	6.64386	6.64386	6.64386	6.64386	6.64386	6.64386	6.64386
D82344_at	6.64386	6.76818	7.13955	6.64386	7.6865	8.46352	6.64386	7.40939	6.64386	6.64386	6.64386	6.64386	6.64386	7.56986	6.64386	7.44294	7.15987	6.64386	6.64386	7.3837	6.64386	7.55459	7.63662	6.64386	7.69349	7.29462	6.83289	6.64386	7.8009	6.64386	6.94251	7.56986	7.6865	7.35755	7.04439	6.64386	7.58496	7.12928	6.88264	7.12928	6.64386	6.96578	6.64386	6.64386	6.64386	6.64386	7.47573	6.84549	6.64386
D82345_at	6.6865	7.19967	6.64386	7.45943	7.40088	8.51964	8.41785	6.98868	9.01681	6.64386	6.64386	6.64386	6.70044	6.78136	8.16491	6.64386	6.64386	6.83289	7.60733	7.64386	6.64386	6.64386	6.64386	6.75489	7.57743	6.64386	6.64386	7.49185	7.75489	6.64386	6.64386	6.64386	8.47978	6.90689	6.64386	6.64386	10.93	7.76818	8.08215	9.50184	6.64386	6.64386	10.9844	9.82177	9.59619	6.64386	10.5411	7.10852	6.64386
D82346_at	6.64386	7.93664	7.87652	6.64386	6.70044	6.64386	7.91886	9.91139	8.12928	7.89482	8.29462	8.82655	7.31288	6.64386	6.64386	7.46761	6.64386	6.64386	8.41785	6.83289	6.64386	6.64386	6.64386	6.64386	6.9542	6.64386	7.62205	6.64386	6.64386	6.64386	6.72792	6.64386	6.64386	7.13955	6.88264	6.64386	6.64386	6.64386	6.64386	6.64386	6.9542	6.64386	7.48382	6.64386	6.64386	6.64386	6.94251	6.64386	6.64386
D82348_at	8.75489	9.7879	9.03617	8.64746	9.3015	10.3298	10.3038	8.92184	8.66888	9.20701	8.9629	10.2009	8.50383	7.91886	9.88264	10.2192	8.62936	10.3163	9.46148	6.64386	10.0098	6.64386	7.98299	9.42626	10.4615	9.33539	8.11894	9.67066	9.28077	9.66	9.92926	10.4263	8.82972	8.06609	9.07682	9.90238	10.7339	9.71253	10.275	10.224	9.4818	7.32193	11.0396	10.7457	9.67419	6.64386	8.94251	10.9359	9.69697
D83004_at	7.14975	7.34873	8.35315	8.633	9.85019	8.13955	9.48784	8.69697	8.633	8.17991	7.82018	8.65105	8.83289	9.62022	9.63118	10.1485	8.59991	8.13955	7.70044	7.64386	7.49185	10.0375	8.35315	8.90087	9.61102	8.22882	6.64386	8.2384	8.7879	7.41785	8.84549	8.62571	8.88874	8.14975	8.96578	9.30606	9.85953	9.43045	9.75656	7.79442	9.0607	7.76818	9.84078	8.90989	9.79442	8.14975	9.50581	9.07414	9.46557
D83018_at	8.98299	9.40939	8.76155	8.3837	8.88264	9.9571	7.62936	8.44294	8.22882	8.01681	8.19476	8.24793	9.43045	8.91588	8.633	9.21432	7.88874	8.43879	9.16993	8.36632	8.53138	9.35315	8.70736	8.89482	9.03892	8.3837	9.55842	8.62936	9.42836	8.00562	7.72792	9.32193	9.77808	8.71768	8.73132	8.83605	9.27845	8.58496	8.17991	8.60363	9	9.12928	8.97154	8.56986	8.56605	8.54303	8.20945	8.64386	7.71425
D83032_at	7.69349	8.34873	8.10852	8.93958	9.81218	8.89785	9.59432	8.92778	9.2738	9.09011	8.0607	8.47978	8.43045	6.94251	9.37938	9.34873	7.59246	8.30834	8.49185	7.27612	6.64386	7.26679	6.64386	7.07682	8.73809	7.55459	8.08746	8.44294	6.96578	7.12928	6.64386	8.59619	10.0458	9.45943	8.36194	7.86419	8.36194	8.62205	9.15987	7.48382	7.87652	8.05528	8.24317	6.64386	6.64386	6.64386	9.56605	9.00282	9.01123
D83195_at	6.64386	6.64386	6.64386	6.64386	6.64386	6.64386	6.64386	6.64386	6.64386	6.64386	6.64386	6.64386	6.64386	6.64386	6.64386	6.64386	6.64386	6.64386	6.64386	6.64386	6.64386	6.64386	6.64386	6.64386	6.64386	6.64386	6.64386	6.64386	6.64386	6.64386	6.64386	6.64386	6.64386	6.64386	6.64386	6.64386	6.64386	6.64386	6.64386	6.64386	6.64386	6.64386	6.64386	6.64386	6.64386	6.64386	6.64386	6.64386	6.64386
D83243_at	8.08746	9.10066	8.48382	8.31741	9.40088	8.89785	8.77479	8.34873	8.60363	8.33985	7.77479	8.01123	8.18488	8.21917	8.45533	8.83289	7.83289	8.0607	8.35315	7.82018	7	8.15482	8.25267	8.09276	8.40088	6.75489	8.2854	7.41785	8.33092	8.33092	7.08746	8.61102	8.79442	8.34873	9.17493	7.18982	8.97154	8.99152	8.07682	8.20945	8.62936	8.43879	8.36194	8.13443	8.03892	7.76155	9.04166	8.55842	8.50383
D83407_at	7.43463	7.5157	6.64386	6.64386	6.89482	7.82655	6.64386	6.64386	6.64386	7.08746	6.64386	6.64386	6.64386	6.97728	6.64386	6.64386	6.64386	6.64386	7.7879	6.64386	6.64386	7.04439	6.72792	6.64386	7.5157	6.64386	6.64386	6.79442	6.87036	6.64386	6.64386	7.57743	6.64386	7.31288	6.78136	6.64386	7.90689	7.04439	6.64386	8.35315	6.64386	6.64386	6.64386	6.82018	6.64386	6.64386	6.64386	6.80735	6.64386
D83542_at	10.446	9.87805	10.1046	9.47168	9.83289	10.8619	8.53916	9.65284	9.0954	8.52356	9.56796	9.33316	9.07948	9.86728	8.97154	9.46761	9.27845	9.56224	10.0293	7.96	9.43254	10.4543	9.85019	6.96578	9.99577	9.29002	10.3454	9.15987	10.3365	9.49985	9.07948	9.48985	10.9181	9.25974	10.2586	9.65105	9.92333	10.3542	9.26679	9.49785	10.2119	9.93517	10.446	8.43463	9.83763	9.12153	9.85798	9.6865	9.32643
D83597_at	6.64386	7.57743	6.83289	8.06609	7.70736	8.95128	7.08746	6.64386	7.33092	6.64386	6.64386	7.87652	7.17991	8.3966	8.35315	9.19967	6.64386	7.31288	8.56224	6.64386	7.62205	8.08746	7.44294	6.78136	9.20945	6.98868	8.64746	7.65105	8.31288	6.97728	6.64386	10.0348	8.30834	8.35755	7.92481	6.89482	7.24793	8.22882	7.80735	7.55459	6.93074	8.28077	7.2854	7.02237	6.64386	6.64386	7.45943	6.76818	8.3443
D83657_at	6.64386	6.64386	6.72792	6.64386	6.64386	6.64386	6.64386	11.3365	6.64386	6.64386	6.64386	7.03342	6.64386	6.64386	8.90087	6.64386	6.84549	9.10066	9.02237	7.93074	9.69174	6.64386	6.64386	6.64386	6.64386	6.64386	8.35315	10.7582	6.64386	6.64386	6.64386	7.88264	6.64386	11.4929	6.64386	6.64386	6.64386	6.64386	7.24793	6.64386	6.64386	6.64386	6.64386	6.64386	6.64386	7.45121	6.64386	6.64386	6.64386
D83699_at	6.64386	6.93074	6.71425	6.64386	6.64386	8.82337	6.97728	6.64386	6.64386	6.64386	6.88264	6.64386	6.64386	7.91886	6.64386	6.64386	6.64386	6.64386	6.94251	7.16993	6.64386	6.83289	7.42626	6.64386	6.64386	6.64386	7.71425	6.64386	8.20945	6.76818	6.64386	6.64386	8.12412	6.88264	8.81378	6.64386	6.64386	7.49185	6.64386	7.26679	7.08746	8.64746	6.64386	7.31288	6.64386	7.04439	6.64386	6.64386	6.64386
D83702_at	6.64386	6.79442	6.64386	6.64386	6.65821	6.64386	6.64386	6.64386	6.64386	6.64386	6.64386	6.64386	6.64386	9.13443	6.64386	6.64386	6.89482	6.64386	6.64386	6.64386	6.64386	7.60733	6.64386	6.64386	7.12928	6.64386	6.64386	6.64386	6.64386	6.64386	6.64386	6.64386	6.6865	6.64386	6.85798	8.32643	6.64386	6.64386	6.64386	6.82018	6.64386	6.64386	7.65105	6.64386	7.74819	6.64386	6.64386	7.39232	6.78136
D83703_at	8.13955	7.19967	8.07146	8.14466	8.59619	8.44708	8.92184	8.64746	6.64386	8.54689	8.34873	8.14975	7.25739	8.29002	7.06609	7.70736	8.27146	8.36194	6.64386	7.97154	6.64386	8.34873	6.9542	7.69349	9.4818	7.64386	8.92184	8.93958	9.07948	8.3966	6.72792	7.62205	9.02237	6.64386	7.90087	8.10852	9.25267	7.11894	8.83289	7.6865	7.76818	8.04985	8.03892	6.79442	6.85798	7.14975	7.67948	6.64386	8.06609
D83735_at	6.64386	8.13443	6.64386	9.17742	9.83763	6.64386	6.64386	10.6439	6.64386	6.64386	9.75822	10.8642	11.1396	10.7457	10.9858	10.9908	11.9344	6.64386	6.64386	10.3421	6.64386	10.6101	6.64386	6.71425	6.64386	8.51175	11.06	9.96	11.3859	10.9425	9.90689	11.0701	9.17991	11.6926	6.64386	10.1059	9.61102	6.64386	6.64386	6.64386	6.64386	6.64386	10.2633	6.6865	7.67948	9.96723	6.64386	11.5245	8.53528
D83767_at	6.64386	6.64386	6.64386	6.64386	6.83289	6.64386	6.64386	6.6865	6.64386	6.64386	6.64386	6.64386	6.64386	6.64386	6.76818	7.56224	6.64386	6.64386	6.64386	6.64386	6.64386	6.64386	6.64386	6.64386	6.64386	6.64386	6.64386	6.83289	6.64386	6.64386	6.64386	6.64386	6.6865	6.64386	6.64386	6.64386	6.64386	6.64386	7.04439	6.64386	6.64386	6.64386	6.64386	6.64386	6.64386	6.64386	6.64386	6.64386	6.64386
D83776_at	8.3966	8.66178	7.36632	8	9.73132	7.96	8.87036	7.43463	7.92481	7	7.29462	7.17991	7.7879	8.98584	8.85487	8.87344	8.18982	6.67243	7.94837	8	6.64386	8.41363	7.32193	7.09803	8.3443	7.17991	6.64386	7.83289	7.91886	7.40939	7	8.23362	10.0861	7.33985	8.7039	8.64746	8.48382	8.61102	8.74147	7.10852	7.67243	6.65821	8.25739	6.64386	8.78136	6.64386	9.27845	9.13955	9.04166
D83777_at	6.64386	6.64386	6.64386	6.64386	6.64386	6.64386	6.64386	6.64386	6.64386	6.64386	6.64386	6.64386	6.64386	6.64386	6.64386	6.64386	6.64386	6.64386	6.64386	6.64386	6.64386	6.64386	6.64386	6.64386	6.64386	6.64386	6.64386	6.64386	9.60363	6.64386	6.64386	6.64386	6.64386	6.64386	6.64386	9.65821	7.20945	6.64386	6.64386	6.64386	6.64386	6.64386	6.64386	6.64386	6.64386	6.64386	6.64386	6.64386	6.64386
D83778_at	9.78627	8.61839	8.58871	9.32193	9.18239	10.2192	9.12928	6.64386	8.60363	8.10852	8.04439	8.31288	9.09011	9.50184	9.20701	9.39446	9.31288	9.15735	9.43463	8.71768	6.64386	10.7125	9.11114	9.70217	9.41785	8.96867	9.45327	7.81378	9.55459	8.44708	7.83289	9.36194	10.9366	9.50184	9.23362	9.17243	9.78136	9.44087	9.71253	9.29232	9.68475	8.3966	9.71081	9.28309	9.24793	8.06609	9.55842	8.73471	9.11114
D83779_at	11.6008	9.47371	10.7887	10.2854	10.8925	11.8025	9.88722	10.93	10.4305	10.3061	10.8353	9.96434	11.0471	10.4778	10.4584	11.1319	10.8392	11.1235	11.3614	11.0835	10.5245	11.7682	11.1059	10.9679	10.7781	10.3072	11.4798	9.45533	11.576	10.2726	9.39874	10.4888	11.4964	10.4409	11.6078	11.545	11.3504	11.021	10.5765	10.9256	11.8186	10.9571	11.1636	11.0668	10.6662	10.4788	10.6366	10.4686	10.9121
D83780_at	6.64386	6.64386	6.64386	6.64386	7.72792	8.75822	9.01959	6.64386	8.03342	6.64386	7.10852	6.64386	6.9542	7.88874	7.62205	6.64386	6.64386	8.52748	8.78136	6.64386	6.64386	9.79928	6.64386	9.41363	8.56986	7.56986	8.93074	6.64386	8.45533	6.64386	6.64386	8.8009	9.4818	6.64386	8.98584	7.98299	9.93664	8.61839	8.42626	6.64386	7.7879	6.64386	6.64386	8.62205	6.64386	6.64386	8.24793	8.26209	8.32193
D83781_at	6.64386	6.64386	6.64386	6.64386	6.64386	6.64386	6.64386	6.64386	6.64386	6.64386	6.64386	6.64386	6.64386	6.64386	7.13955	6.71425	6.64386	6.64386	6.64386	6.64386	6.64386	6.64386	6.64386	6.64386	6.64386	6.64386	6.64386	6.64386	6.64386	6.64386	6.64386	6.64386	6.91886	6.64386	6.64386	6.64386	6.64386	6.64386	7.45943	6.64386	6.64386	6.64386	6.64386	6.64386	6.64386	6.64386	6.64386	6.64386	6.64386
D83782_at	6.64386	6.64386	6.64386	6.64386	7.89482	6.64386	6.64386	6.64386	8.224	7.65105	8.06609	6.64386	6.64386	6.64386	6.64386	8.18982	7.10852	6.64386	7.03342	9.35535	6.64386	6.64386	6.64386	6.64386	7.85798	6.89482	6.64386	6.64386	6.64386	6.64386	7.8009	6.64386	8.03342	7.01123	6.64386	6.64386	6.64386	6.64386	8.13443	6.64386	6.64386	6.64386	6.64386	6.64386	6.64386	6.64386	8.59619	6.64386	8.36194
D83783_at	6.64386	8.27612	8.84235	8.35315	10.6609	6.64386	9.43254	8.41363	9.18982	9.12412	9.86419	7.93664	7.10852	6.64386	10.2167	9.47776	7.53138	7.56224	8.55075	10.3509	7.65105	8.32193	6.64386	8.66178	9.33539	7.6865	6.64386	8.32193	7.19967	6.64386	7.96	7.03342	9.86419	8.48784	8.65464	7.70044	8.06609	8.57365	8.86728	8.62205	9.15228	6.64386	8.54303	6.71425	7.3837	8.31741	10.314	8.96578	9.23122
D83784_at	6.64386	6.64386	7.84549	6.64386	7.01123	8.61102	7.58496	6.64386	6.64386	6.64386	6.80735	6.97728	6.64386	6.64386	8.29462	6.64386	7	8.08746	6.64386	7.45121	7.70044	8.46352	7.90087	8.07146	6.64386	6.64386	7.91289	7.87036	8.2854	6.64386	6.64386	9.0954	7.18982	6.64386	8.82337	8.15987	8.81057	7.52356	7.86419	8.73471	9.16491	7.52356	8.64024	6.64386	8.72451	7.18982	6.64386	6.90689	7.36632
D83785_at	7.56986	8.21432	7.5157	8.71425	9.53333	6.64386	8.71768	6.98868	8.63662	7.11894	7	6.64386	7.59991	8.31288	8.30834	8.85798	8.64746	7.67243	8.43045	7.24793	7.24793	9.783	7.06609	7.30378	9.39017	7.6865	7.20945	7.32193	6.64386	8.27146	6.64386	9.23362	9.77808	8.73471	9.19722	7.14975	8.74483	8.6865	8.89178	8.69349	9.21917	9.66	9.14466	6.64386	9.32193	7.36632	9.44087	9.97728	8.84549
D83920_at	6.64386	7.49185	6.64386	6.64386	6.64386	6.64386	6.64386	9.91588	6.64386	6.64386	6.64386	6.64386	6.64386	6.64386	8.10852	6.64386	11.5807	10.3253	10.1649	8.14975	12.2201	9.55651	6.64386	10.6733	6.64386	8.50383	11.0133	9.03067	6.64386	6.64386	7.59246	6.64386	7.54689	13.7595	6.64386	11.1466	7.67948	6.64386	7.66534	10.585	6.64386	6.64386	8.81698	9.36632	6.64386	6.64386	6.64386	10.4168	7.03342
D84110_at	9.20212	6.64386	7.53916	6.64386	8.27612	8.20945	7.35755	8.07146	7.77479	7.87036	7.85175	7.18982	8.31288	8.44708	7.31288	8.19967	8.45533	7.19967	8.65821	7.09803	6.64386	9.12412	6.64386	7.84549	8.7211	7.94837	9.15735	7.55459	8.32193	7.26679	7.40088	7.76818	8.54689	6.64386	8.36632	8.45121	9.16742	7.85175	7.82018	7.70736	8.42626	8.03342	7.62936	8.01123	8.10852	7.74819	8.21432	8.00562	7.5157
D84145_at	6.64386	7.16993	6.64386	6.64386	6.64386	6.64386	6.64386	6.64386	6.64386	6.64386	6.64386	6.64386	6.64386	7.43463	7.74147	6.64386	7.19967	6.64386	6.64386	6.64386	6.64386	8.77808	8.07146	7.56986	7.40088	6.64386	6.64386	6.64386	6.64386	6.64386	6.64386	7.85798	7.40939	6.64386	7.53916	8.52748	6.64386	6.64386	6.6865	6.64386	6.64386	6.64386	6.87036	7.43463	7.86419	6.64386	6.93074	7.29462	6.64386
D84239_at	6.94251	9.26679	6.64386	6.64386	6.64386	6.64386	6.64386	6.64386	6.64386	8.3443	6.64386	6.64386	6.88264	7.01123	6.64386	6.64386	6.72792	6.64386	6.64386	6.64386	8.47573	7.55459	6.64386	6.64386	6.76818	6.64386	6.64386	6.64386	6.64386	8.5157	6.64386	6.83289	9.74651	6.64386	7.39232	6.64386	7.70044	9.25267	6.64386	9.22159	7.75489	9.03342	7.39232	6.64386	7.84549	6.94251	6.64386	7.98299	6.64386
D84276_at	6.64386	6.64386	6.64386	7.40939	7.09803	8.40514	7.19967	6.64386	8.17493	6.64386	6.64386	7.63662	6.64386	6.64386	9.40088	7.13955	7.16993	6.64386	7.88264	6.64386	6.64386	6.64386	6.64386	6.64386	6.98868	6.64386	6.64386	6.64386	6.83289	6.64386	6.64386	6.64386	6.64386	6.64386	7.79442	7.59991	8.37069	7.96	8.27146	6.64386	6.93074	8.30834	7.29462	6.64386	7.40939	6.64386	6.64386	6.64386	8.43463
D84294_at	8.01123	8.18488	9.54303	9.87805	11.2082	8.72792	9.17742	9.58684	9.09803	9.87958	9.56224	7.96578	9.40301	9.75822	9.95855	10.3848	10.3387	7.63662	9.63118	9.37287	7.7211	8.48382	7.97154	8.01123	9.27146	7.74147	6.67243	8.8392	9.03892	8.53528	9.34207	8.69697	7.79442	8.53138	8.92778	9.19967	9.10852	8.3837	9.81057	7.97728	8.49985	8.90989	10.0238	7.98868	9.78136	10.2586	11.062	9.15482	9.69
D84307_at	8.99152	7.21917	7.5157	8.80413	8.92184	9.44294	8.11894	8.56605	8.35315	8.92778	6.64386	8.56986	7.52356	7.85175	9.10591	8.69349	7.43463	8.44708	9.04985	7.85175	8.04985	9.14975	8.97154	8.84235	8.77479	8.40939	8.77479	6.83289	8.11374	8.44708	8.31741	8.23362	6.82018	8.69349	9.07682	7.97728	8.50383	8.17991	8.27146	8.57743	9.15987	9.80735	9.35535	6.84549	8.52356	7.96578	8.633	8.68299	8.52356
D84361_at	8.59991	6.64386	6.64386	6.64386	6.64386	7	6.64386	6.64386	6.64386	6.64386	7.26679	6.96578	7.78136	7.88874	6.64386	6.64386	6.64386	7.76155	8.71081	6.64386	6.64386	6.64386	6.64386	6.64386	8.36632	8.14975	6.64386	6.64386	8.03342	6.64386	6.64386	6.64386	6.64386	6.64386	6.88264	6.64386	7.27612	6.79442	8.43045	6.64386	6.64386	6.64386	6.64386	6.64386	7.59246	6.64386	7.53916	6.64386	7.46761
D84424_at	6.64386	6.64386	6.64386	6.64386	6.64386	7.32193	6.64386	8.14466	6.64386	6.64386	6.64386	6.64386	6.64386	6.64386	6.64386	6.82018	6.64386	6.64386	6.64386	6.64386	6.64386	6.64386	6.64386	6.64386	6.64386	7.82018	8.224	6.64386	6.64386	6.64386	6.64386	6.64386	6.64386	6.64386	7.69349	7.36632	6.64386	6.64386	6.64386	6.64386	6.64386	6.64386	7.42626	6.64386	6.64386	6.64386	6.64386	6.64386	6.64386
D84454_at	6.64386	6.64386	6.64386	6.64386	9.1267	6.64386	6.64386	6.64386	6.64386	6.64386	6.64386	6.67243	6.64386	6.64386	8.62571	7.92481	6.64386	6.64386	6.64386	8.19967	6.64386	6.64386	6.64386	6.64386	6.64386	6.64386	6.64386	6.64386	6.64386	6.64386	6.64386	6.64386	6.64386	6.64386	6.64386	6.64386	6.64386	6.64386	6.96578	6.64386	6.64386	6.64386	6.64386	6.64386	6.64386	6.64386	8.90989	6.64386	7.19967
D84557_at	9.65821	9.29692	9.77314	10.2228	10.9174	10.7731	10.3945	9.71081	10.444	10.1396	9.11374	9.31741	8.98584	9.35535	10.4019	9.88111	8.86728	9.90839	10.3869	9.79279	8.66888	9.71596	9.59991	10.0607	10.2715	9.56224	9.50978	10.1137	9.55459	9.21917	9.88722	10.1948	8.77808	7.74819	9.58871	10.1824	10.9801	9.61655	9.87498	10.7723	9.40939	10.0417	10.8826	10.4305	10.3465	9.29462	10.2479	10.7599	10.1599
D85181_at	6.64386	7.73471	7.06609	6.64386	7.63662	6.64386	6.79442	7.43463	6.64386	6.64386	6.91886	6.64386	6.64386	6.93074	6.64386	6.64386	6.64386	7.16993	6.78136	6.64386	6.64386	7.55459	6.64386	7.09803	8.15987	6.70044	6.64386	6.64386	6.64386	6.64386	6.64386	6.64386	6.64386	6.64386	6.78136	8.15482	6.64386	6.64386	6.64386	7.17991	7.09803	8.23362	8.03892	6.75489	6.64386	6.96578	6.64386	6.64386	6.64386
D85245_at	9.1472	8.54303	8.76487	9.10852	9.46148	9.7039	8.36632	8.47168	8.63662	8.81698	8.79442	8.55075	9.21432	9.10329	8.80413	9.00562	8.68299	8.76818	9.00843	8.26209	8.67243	9.8009	8.90689	7.35755	9.19722	9.07682	9.49785	8.23362	8.59619	9.2503	8.02237	9.69523	9.94983	9	8.96578	9.39874	9.75822	8.61471	9.04712	7.79442	8.85487	9.50184	9.21917	7.76818	8.35755	8.19967	8.65464	8.9571	8.49985
D85376_at	6.64386	7.08746	6.64386	7.40939	7.10852	7.45121	6.64386	6.64386	6.64386	6.64386	6.64386	6.64386	6.64386	6.64386	6.64386	6.64386	6.64386	6.64386	6.64386	6.93074	6.64386	6.64386	6.64386	6.64386	7.31288	6.64386	6.64386	6.64386	7.10852	6.64386	6.64386	7.8009	7.39232	6.64386	7.49185	7.92481	6.64386	7.04439	7.05528	6.64386	7.13955	7.91289	7.33092	7.08746	6.64386	6.64386	6.71425	6.64386	7.04439
D85418_at	6.64386	6.64386	6.64386	6.64386	6.64386	6.64386	7.81378	6.64386	6.64386	6.64386	6.64386	6.64386	6.64386	6.64386	7.31288	6.64386	6.64386	6.64386	6.64386	7.04439	6.64386	7.97154	6.64386	6.64386	6.64386	6.64386	6.64386	6.64386	6.64386	6.64386	6.64386	6.64386	6.64386	6.64386	6.64386	6.64386	6.64386	6.64386	7.37504	6.64386	6.64386	6.64386	6.64386	6.64386	6.64386	6.64386	7.89482	6.64386	6.89482
D85423_at	6.64386	6.64386	6.64386	6.64386	6.64386	6.64386	6.64386	6.9542	6.64386	6.6865	6.64386	6.64386	6.64386	6.64386	6.64386	6.64386	6.64386	6.64386	6.64386	6.64386	6.64386	6.64386	6.64386	6.64386	6.64386	6.64386	6.64386	6.64386	6.64386	6.64386	6.64386	6.64386	6.64386	6.64386	6.64386	6.64386	6.64386	6.64386	6.64386	6.64386	6.64386	6.64386	6.64386	6.64386	6.64386	6.64386	6.64386	6.64386	6.64386
D85429_at	10.2021	6.76818	6.64386	9.73302	11.2137	7.81378	9.57554	9.77149	9.66	13.0602	9.65105	8.64024	10.973	10.2107	10.0914	10.2515	9.23362	6.64386	8.9629	8.19967	9.82018	9.224	8.09276	9.12412	9.13443	8.00562	7.43463	6.87036	10.446	10.7288	9.67066	7.98299	7.74147	8.50383	9.70217	10.4147	9.47573	8.59246	8.7039	8.92778	6.83289	6.64386	9.97728	12.3115	9.40939	8.43879	10.1812	8.99435	9.24317
D85433_at	6.64386	6.64386	6.64386	6.64386	8.13443	6.64386	6.64386	6.64386	7.17991	6.70044	6.64386	7.45943	6.64386	6.64386	8.224	8.42206	6.91886	7.82655	6.64386	7.36632	7.22882	6.64386	7.22882	6.89482	6.64386	6.64386	6.64386	6.64386	6.64386	6.9542	8.02237	7.91886	6.64386	7.76155	7.78136	7.98299	8.3837	6.64386	8.29921	8.00562	6.64386	6.64386	6.64386	7.5157	7.02237	7.01123	6.98868	7.99435	7.55459
D85527_at	9.59246	8.92778	8.01123	8.93369	9.17742	9.77808	7.62936	7.53138	7.55459	7.56224	7.97154	7.89482	8.67596	8.92481	8.00562	8.85798	8.64024	8.37504	8.93369	8.43045	6.64386	9.97011	9.05799	9.04712	8.92778	8.60363	9.11114	7.96578	9.2854	8.82655	7.87036	9.65284	10.2738	9.33539	9.18982	9.21917	9.68475	8.29462	8.82972	9.0954	9.00562	8.92778	9.40727	9.35975	9.13443	7.83289	9.03342	8.69697	7.9542
D85758_at	9.70563	9.74819	10.2046	10.749	11.6667	10.4828	10.4073	9.05799	10.1254	9.07146	9.74315	9.14466	9.06878	9.60363	10.388	10.6493	9.46148	10.3772	9.38586	10.0901	10.5699	9.35094	9.56986	10.0755	10.5812	8.87958	8.5812	9.91439	9.76984	9.62205	9.60363	9.88722	9.0607	10.0688	9.72792	10.5401	11.258	9.83605	10.9462	10.1787	8.74819	9.79279	11.3015	10.8463	10.2264	9.29692	11.6018	10.6083	10.6742
D85815_at	7.41785	9.30606	9.58496	8.40088	8.03892	10.4419	8.71081	6.64386	9.18982	6.64386	9.30606	6.64386	9.31061	7.54689	8.15987	9.30606	7.47573	8.07146	8.11894	9.95565	6.64386	10.0154	9.92926	9.87958	6.98868	7.21917	8.62571	9.31515	8.30378	8.84549	9.09011	10.2021	10.1561	8.93074	10.0674	9.19722	10.0498	10.1911	9.43045	9.91737	10.5098	10.0265	9.9542	8.16491	9.28771	6.85798	6.64386	9.5157	9.81218
D85939_at	8.29002	6.88264	6.64386	7.08746	6.64386	6.64386	6.64386	6.64386	6.64386	6.75489	6.64386	7.88264	6.64386	6.64386	6.64386	7.91886	6.64386	8.58496	6.64386	6.64386	6.64386	7.26679	7.74819	8.67596	6.64386	6.82018	8.53138	6.64386	6.64386	6.64386	6.64386	6.64386	6.64386	6.64386	6.64386	6.64386	6.64386	6.64386	6.64386	7.62205	8.31741	6.96578	7.77479	6.65821	6.64386	6.64386	6.64386	6.64386	6.64386
D86096_cds3_at	6.64386	6.64386	6.64386	6.64386	6.64386	6.64386	6.64386	6.87036	6.64386	6.64386	6.64386	6.64386	6.64386	6.64386	6.64386	6.64386	6.64386	6.64386	6.64386	6.64386	6.64386	6.64386	6.64386	6.64386	6.64386	6.64386	6.64386	6.64386	6.64386	6.64386	6.64386	6.64386	6.64386	6.64386	6.75489	6.64386	6.70044	6.64386	6.64386	6.64386	6.64386	6.64386	6.64386	6.64386	6.64386	6.64386	6.64386	6.64386	6.64386
D86425_at	6.64386	6.64386	6.64386	6.64386	6.64386	8.27612	6.64386	6.71425	6.64386	6.64386	6.64386	6.64386	6.64386	6.64386	6.64386	6.64386	6.64386	6.64386	6.64386	7.45121	6.64386	6.64386	6.64386	6.64386	6.64386	6.64386	6.64386	6.64386	6.64386	6.64386	6.64386	6.64386	6.64386	6.64386	6.64386	6.64386	6.64386	6.64386	6.64386	6.64386	6.70044	6.64386	6.64386	6.64386	6.64386	6.64386	6.64386	6.64386	6.64386
D86479_at	10.2312	9.54689	9.11374	9.14211	9.92926	12.5135	10.7764	10.5362	10.0755	9.48583	10.0701	9.7211	9.64386	9.98584	9.1267	10.1137	8.66888	9.57554	11.3531	10.3869	8.70736	9.98442	8.97728	9.66	9.39017	8.8009	8.62571	9.13955	8.71425	9.224	8.86728	9.88874	10.5098	9.06878	10.4315	10.6138	10.4727	11.2444	9.90087	9.54303	10.3955	11.0855	10.8549	9.8933	10.0098	9.03342	9.09276	9.96578	11.0921
D86519_at	8.0607	7.96578	8.13955	8.01123	7.56224	8.86109	6.64386	7.63662	7.67243	7.79442	6.80735	6.64386	7.43463	7.26679	7.70736	6.98868	6.93074	6.67243	8.65821	6.64386	7.55459	8.27612	8.10329	7.94251	8.17493	6.64386	7.45943	6.64386	7.19967	8.12928	6.64386	8.24793	7.79442	7.24793	7.94837	6.98868	8.89178	7.29462	7.50779	7.3837	8.64746	8.2384	8.58496	6.64386	7.15987	6.96578	6.83289	7.17991	6.64386
D86549_at	8.10329	8.17493	7.3837	7.34873	8.97154	6.64386	7.47573	7.45121	7.71425	8.02791	6.6865	6.64386	6.64386	7.10852	8.16491	7.8009	6.64386	6.64386	6.64386	6.64386	7.22882	7.12928	7.92481	6.64386	7.82655	6.64386	6.64386	6.64386	7.97154	8.3443	7.49185	7.45121	6.64386	6.64386	8.17493	9.07682	8.62936	7.74819	8.55459	6.64386	8.29921	6.64386	8.77149	6.64386	7.87652	8.02237	7.94251	7.48382	6.64386
D86640_at	6.64386	6.72792	6.64386	6.64386	6.64386	7.40088	6.64386	6.64386	6.64386	6.6865	6.64386	6.64386	6.64386	6.64386	6.64386	6.64386	6.64386	6.64386	7.49185	6.64386	6.64386	7.33092	6.64386	7.74819	6.64386	6.64386	6.64386	6.64386	6.64386	6.64386	7.13955	6.64386	7.29462	6.64386	6.64386	6.64386	7.13955	6.64386	6.64386	6.90689	6.64386	7.59991	6.79442	6.88264	6.64386	6.64386	6.79442	6.64386	6.64386
D86956_at	6.64386	6.64386	6.64386	8	10.952	6.64386	7.77479	7.73471	6.64386	7.94837	7.98868	6.64386	6.64386	6.64386	8.33092	6.64386	6.64386	6.64386	6.64386	6.64386	6.64386	6.64386	6.64386	6.64386	8.21432	6.64386	6.64386	6.64386	6.98868	6.64386	6.64386	6.64386	7.96	6.64386	7.8009	7.5157	8.09276	7.8392	9.3443	6.64386	6.70044	6.64386	7.55459	9.99435	6.64386	6.64386	9.35755	8.07682	7.97728
D86957_at	6.64386	6.64386	6.6865	6.64386	6.93074	6.64386	6.64386	6.64386	6.64386	6.64386	6.64386	6.64386	6.64386	6.64386	6.64386	6.9542	6.64386	6.64386	6.64386	6.64386	6.64386	6.64386	6.64386	6.64386	6.64386	6.64386	6.64386	6.64386	6.64386	6.64386	6.64386	6.89482	6.64386	6.64386	6.64386	6.64386	7	6.64386	6.64386	7.53916	6.64386	6.64386	6.64386	6.79442	6.64386	6.64386	6.64386	6.64386	6.64386
D86959_at	7.24793	6.98868	6.85798	6.64386	7.16993	6.67243	6.64386	6.64386	6.64386	6.64386	6.64386	6.64386	6.64386	7.50779	6.79442	7.81378	7.55459	6.64386	6.64386	6.64386	6.64386	8.2854	7.33985	7.60733	7.5157	6.64386	7.37504	6.64386	7.63662	6.64386	6.64386	7.47573	8.63662	6.64386	6.74147	8.53138	6.65821	6.64386	6.64386	6.64386	7.01123	6.64386	6.74147	7.33092	7.50779	6.64386	7.8392	7.45121	6.64386
D86960_at	6.98868	6.71425	7.44294	8.59991	8.34873	6.79442	6.64386	7.2384	6.76818	6.6865	6.64386	6.64386	6.64386	6.94251	6.97728	7.79442	7.41785	6.64386	6.64386	6.64386	7.44294	7.2854	6.78136	7.35755	8.02791	6.64386	6.64386	6.64386	7.19967	6.64386	6.64386	7.89482	6.64386	8.26679	7.49985	6.64386	6.96578	7.08746	6.70044	6.64386	7.35755	7.85798	6.64386	6.64386	6.64386	6.64386	8.61839	7.10852	6.64386
D86961_at	6.64386	6.64386	6.64386	6.64386	6.64386	6.64386	6.64386	6.64386	6.64386	6.64386	6.64386	6.64386	6.64386	6.64386	6.64386	6.64386	6.64386	6.64386	6.64386	6.64386	6.64386	6.64386	6.64386	6.64386	6.64386	6.64386	6.64386	6.64386	6.64386	6.64386	6.64386	6.64386	6.64386	6.64386	6.64386	6.64386	6.64386	6.64386	6.64386	6.64386	6.64386	6.64386	6.64386	6.64386	6.64386	6.64386	6.64386	6.64386	6.64386
D86962_at	9.24079	9.6987	8.04439	9.48382	9.40727	9.10852	8.11374	8.98584	8.45533	8.83289	7.35755	7.36632	7.74147	8.69	8.46761	8.15482	7.5157	9.38586	8.9542	8.16491	7.96578	8.90388	8.62205	8.98868	8.66178	8.67948	8.94837	9.10329	9.49785	7.9542	7.87036	8.62571	9.70908	8.93074	9.35535	7.62205	8.51964	7.91289	9.47978	7.82655	8.68299	9.5411	8.48784	7.87652	7.96578	7.63662	9.31515	7.69349	8.85175
D86963_at	9.94983	9.24555	8.9542	8.93958	9.2503	9.62571	8.85798	7.98868	9.08746	9.0607	8.36194	8.21432	8.64386	9.3443	9.33092	8.91886	8.45533	8.87344	9.18982	9.32193	7.79442	9.9901	8.93664	9.21917	9.45327	8.34873	9.16491	8.3443	9.35315	8.77149	8.21432	9.17742	9.0954	9.15987	9.16742	9.28309	9.37504	9.31967	8.78136	8.96867	9.32867	9.59432	9.18239	8.40939	8.21917	8.32643	9.29002	8.69697	9.32418
D86964_at	8.93664	6.64386	8.12928	8.16491	9.06609	9.00843	8.9571	6.90689	8.07146	7.12928	8.30378	8.64386	8.92184	8.90989	8.64024	9.14466	9.33316	8.29462	8.59991	7.67948	9.46352	8.96	8.37069	8.90388	9.60548	7.92481	9.40088	9.03067	8.59619	8.78463	8.07146	10.1636	9.40301	10.0728	8.94837	9.32867	8.8857	8.20457	8.36194	9.07682	7.81378	8.20945	9.68299	8.65464	9.25739	7.91289	8.71081	9.91886	9.08481
D86965_at	9.85487	8.87344	10.6257	10.7764	9.31288	11.2761	10.2479	10.6357	10.4512	10.6978	10.3072	10.0607	10.2503	9.93369	10.1072	10.2831	10.1923	10.1137	10.5584	9.74651	9.85953	9.91289	10.4252	11.3348	10.4696	10.1611	10.8202	10.0954	10.3848	9.09803	9.23362	9.77972	11.2015	10.6935	9.50978	10.5527	9.84392	10.0821	10.1886	10.5343	10.7624	10.3794	9.69174	10.3038	9.90839	9.39874	9.04985	10.3163	10.1548
D86966_at	9.81698	10.332	9.59619	10.4105	9.86882	10.1561	9.63118	9.55842	8.40088	8.40939	9.15735	9.73978	9.58308	9.36851	9.00843	10.1189	9.63118	10.0098	10.2738	7.49185	6.64386	10.5459	9.37287	10.1984	10.1923	9.3443	10.6987	9.16491	9.85953	10.0715	9.79442	10.4083	11.1768	10.0028	9.55842	9.73132	10	10.3276	9.73132	9.5411	9.74147	10.6457	10.1383	9.64024	10.0375	9.13186	9.62388	9.80735	9.61839
D86967_at	11.5157	10.0458	11.525	10.2204	10.7607	10.388	10.0444	10.9737	12.236	10.9986	9.96145	9.98868	11.0954	12.0454	10.9979	10.9614	10.014	9.11374	10.2216	11.462	8.17493	10.207	9.64024	9.92778	10.9979	9.66711	9.95855	10.268	10.3253	9.29462	8.25739	10.1911	10.4294	10.0471	12.0855	11.3185	10.8572	9.83289	9.99294	10.2095	9.76984	11.0485	11.5722	11.0485	11.2992	9.92184	12.2456	9.15735	9.85643
D86968_at	6.64386	6.64386	6.64386	6.64386	6.64386	6.64386	6.64386	6.64386	6.64386	6.64386	6.64386	6.64386	6.64386	6.64386	6.64386	6.64386	6.64386	6.64386	6.64386	6.64386	6.64386	6.64386	6.64386	6.64386	6.64386	6.64386	6.64386	6.64386	6.64386	6.64386	6.64386	6.64386	6.64386	6.64386	6.64386	6.64386	6.64386	6.64386	6.64386	6.64386	6.64386	6.64386	6.64386	6.64386	6.64386	6.64386	6.64386	6.64386	6.65821
D86969_at	6.64386	6.64386	6.64386	6.64386	9.10066	6.64386	6.96578	6.64386	6.64386	6.64386	6.80735	6.64386	6.64386	7.11894	7.22882	7.04439	6.64386	6.87036	7.18982	6.64386	6.64386	6.64386	6.64386	6.64386	6.64386	6.64386	6.64386	6.64386	6.64386	6.64386	6.64386	6.64386	6.6865	7.24793	6.64386	6.64386	7.53138	6.64386	6.64386	6.64386	6.64386	6.96578	6.64386	6.64386	6.64386	6.64386	7.85175	6.64386	6.64386
D86970_at	10.0875	9.63844	10.1624	10.1447	11.623	10.4157	10.3095	9.23601	9.5812	10.115	10.7406	8.18982	9.24793	9.52552	10.0389	10.9643	9.31515	9.40727	9.13186	11.0941	6.64386	8.75822	7.42626	8.23362	8.633	8.19967	8.9571	8.08215	10.3298	9.07682	6.97728	9.36413	10.1599	7.76155	9.59432	9.21432	8.72451	8.91588	9.72962	8.31288	9.29921	8.73132	9.16239	7.07682	7.91886	8.51964	12.0937	7.98299	11.0224
D86971_at	6.64386	6.64386	6.64386	8.21917	8.81057	6.64386	8.39232	6.64386	6.94251	7.73471	6.64386	6.64386	6.64386	6.87036	9.21432	9.31288	6.64386	7.97728	7.29462	6.64386	6.64386	7.87652	6.64386	6.64386	6.64386	6.64386	6.64386	6.64386	7.67948	6.64386	6.64386	8.55459	8.96867	8.93074	6.64386	8.58871	6.64386	7.83289	8.41785	6.64386	6.64386	6.64386	6.64386	6.64386	6.64386	6.64386	9.72962	7.6865	9.10852
D86972_at	7.09803	7.61471	8.40939	8.64024	8.73471	8.08746	8.44708	7.34873	7.98868	8.2854	7.91289	7.29462	8.29002	8.49985	9.18239	9.03892	8.61839	8.04439	7.56986	8.224	8.23362	8.35315	8.28077	7.8009	8.20945	7.44294	6.90689	7.45943	8.04439	7.48382	8.53528	8.3837	7.58496	6.64386	8.06609	9.18982	8.94544	8.16993	8.95128	7.46761	8.44708	6.98868	9.55075	8.49586	9.06609	6.6865	8.85487	8.9629	8.84549
D86973_at	7.91289	6.64386	8.37069	9.57743	10.0715	9.23362	8.87958	8.20457	8.03892	8.77149	8.81057	7.41785	8.84549	8.99435	9.31741	10.3399	9.55459	8.79442	8.30378	6.93074	8.75489	8.79766	6.64386	6.64386	9.90388	7.31288	8.43463	8.76155	9.13186	6.64386	8.93369	6.64386	7.45943	6.64386	7.13955	10.1137	7.35755	6.64386	9.11114	8.98868	6.64386	6.64386	9.85487	6.64386	9.11374	6.64386	8.93664	9.79604	9.69
D86975_at	6.64386	6.64386	6.64386	6.64386	6.64386	6.64386	6.64386	6.64386	6.64386	7.26679	6.64386	6.64386	6.64386	6.64386	6.64386	6.64386	6.64386	6.64386	6.64386	6.64386	6.64386	6.64386	7.74819	6.64386	6.64386	6.64386	6.64386	6.64386	6.64386	6.64386	6.64386	7.41785	6.64386	6.96578	6.64386	6.64386	6.64386	6.64386	6.64386	6.64386	6.64386	6.64386	6.64386	6.64386	6.64386	6.64386	6.64386	6.64386	6.97728
D86976_at	10.4284	9.57932	9.12412	9.52552	10.7499	10.5098	10.8727	9.61287	9.67596	10.0593	10.865	9.34207	11.5401	10.8773	11.5873	11.5665	10.2946	10.3966	10.3354	10.4998	9.85331	10.5527	8.5157	9.94544	10.2969	9.57743	10.352	8.53528	9.61471	9.78136	8.31741	11.3685	11.5957	11.286	10.4305	10.2456	10.8834	10.1523	10.749	9.96145	10.5584	9.30834	11.2912	9.26444	9.71425	9.1472	10.7773	11.0161	11.0189
D86977_at	8.74483	9.22882	8.84862	8.53528	9.45943	9.16742	9.50581	8.75489	9.49785	8.19476	9.31741	8.79766	9.70044	9.75154	9.95274	9.69	9.54303	8.9542	8.91886	8.89785	8.27146	10.0715	9.12153	9.37069	9.53528	8.96867	7.45943	7.37504	8.77808	9.42206	8.87344	9.01681	10.3174	9.35975	9.23122	9.14466	9.39874	8.95128	9.47168	9.20457	9.36632	8.84862	9.04166	9.78136	9.32418	8.56986	9.83131	9.32643	9.50779
D86978_at	7.98299	8.49185	8.01123	9.07682	10.0875	8.85175	8.82337	8.39232	9.04166	7.85798	7.61471	6.93074	8.45943	8.72451	9.27146	9.03892	6.64386	8.46761	9.02237	8.21432	7.04439	9.3443	7.33985	8.36194	9.04439	7.86419	8.55842	7.96	7.43463	7.09803	7.84549	8.8009	10.268	7.90689	9.53528	8.63662	9.29232	8.29002	9.45738	8.70044	8.90689	8.61471	10	8.61839	8.70044	7.07682	10.1649	9.17493	9.29002
D86979_at	9.65821	9.47978	9.00562	9.51373	9.76818	9.1267	8.75822	9.1472	8.69697	8.49185	8.64024	8.85798	9.59805	9.42417	9.94398	9.65464	9.55842	8.62205	9.47776	9.50383	8.46352	9.06609	8.41363	9.12928	9.29462	8.55075	9.44708	8.56605	8.99152	8.53138	8.55075	9.87805	10.4041	9.46761	10.1662	9.0607	9.9542	9.74315	9.52552	8.90087	9.31741	10.0728	9.83605	8.33539	8.61839	8.75489	9.78627	8.86109	9.48583
D86980_at	6.64386	6.64386	6.64386	6.64386	6.64386	6.64386	6.64386	6.64386	6.64386	6.64386	6.64386	6.64386	6.64386	6.64386	6.64386	6.64386	6.64386	6.64386	6.64386	6.64386	6.64386	6.64386	6.64386	6.64386	6.64386	6.64386	6.64386	6.64386	6.64386	6.64386	6.64386	6.64386	6.64386	6.64386	6.64386	6.64386	6.64386	6.64386	6.64386	6.64386	6.64386	6.64386	6.64386	6.64386	6.64386	6.64386	6.64386	6.64386	6.64386
D86981_at	6.64386	6.64386	6.64386	6.64386	8.44708	6.64386	6.64386	6.64386	6.64386	6.64386	6.64386	6.64386	6.64386	6.64386	6.64386	6.64386	6.64386	6.64386	6.64386	6.85798	6.64386	6.64386	6.64386	6.64386	6.64386	6.64386	6.64386	6.64386	6.64386	6.64386	6.64386	6.64386	6.64386	6.64386	6.79442	6.64386	6.64386	6.64386	6.64386	6.64386	6.64386	7.08746	6.64386	6.64386	6.64386	6.64386	7.44294	6.64386	6.64386
D86982_at	8.19967	7.65821	6.64386	7.31288	8.09276	7.27612	7.99435	8.10852	6.87036	7.25739	7.40939	6.64386	7.56224	6.64386	8.07146	8.16993	6.64386	7.69349	6.94251	7.89482	7.58496	7.91886	6.64386	6.88264	8.7879	7.42626	7.94837	7.74819	7.30378	6.6865	7.17991	8.33539	8.61839	8.21917	8.04985	7.27612	7.90087	8.10852	7.99435	6.64386	8.11894	7.74819	7.89482	6.64386	7.27612	6.64386	8.48784	6.64386	8.04439
D86983_at	9.77808	11.8807	8.70044	8.55459	9.39017	8.98868	8	8.36194	10.4147	9.1472	9.20212	9.1472	8.633	9.86264	9.39232	9.79116	7.65105	8.85798	8.99152	9.63118	7.60733	8.91886	9.02237	9.03617	8.08746	7.44294	7.67243	8.47168	7.96	6.70044	7.36632	8.49185	9.24555	7.54689	11.7013	7.70044	11.0681	9.98868	9.43671	10.4878	8.85487	11.9028	10.5546	8.03892	7.58496	10.2467	10.5613	10.4325	9.69349
D86984_at	6.64386	6.64386	6.64386	6.64386	6.64386	6.64386	6.64386	6.64386	6.64386	6.64386	6.64386	6.64386	6.64386	6.64386	6.64386	6.64386	6.64386	6.64386	6.64386	6.64386	6.64386	6.64386	6.64386	6.64386	6.64386	6.64386	6.64386	6.64386	6.64386	6.64386	6.64386	6.64386	6.64386	6.64386	6.64386	6.64386	6.64386	6.64386	6.64386	6.64386	6.64386	6.64386	6.64386	6.64386	6.64386	6.64386	6.64386	6.64386	6.64386
D86985_at	6.64386	6.64386	7.77479	7.44294	8.92481	6.64386	8.40088	6.75489	8.03892	6.64386	6.85798	6.64386	6.6865	7.8009	8.48784	7.56224	7.75489	6.64386	6.64386	7.33985	6.64386	8.19967	7.86419	6.64386	6.64386	6.64386	6.64386	6.80735	6.64386	6.64386	6.64386	6.64386	7.40939	6.64386	6.64386	7.62205	6.64386	6.64386	7.62205	6.64386	6.64386	6.78136	7.11894	6.64386	8.97728	6.64386	9.37504	6.97728	7.64386
D87009_cds3_at	6.64386	6.64386	6.64386	6.64386	6.64386	6.64386	6.64386	6.64386	6.64386	6.64386	6.64386	6.64386	6.64386	6.64386	6.64386	6.64386	6.64386	6.64386	6.64386	6.64386	6.64386	6.64386	6.64386	6.64386	6.64386	6.64386	6.64386	6.64386	6.64386	6.64386	6.64386	6.64386	6.64386	6.64386	6.64386	6.64386	6.64386	6.64386	6.64386	6.64386	6.64386	6.64386	6.64386	6.64386	6.64386	6.64386	6.64386	6.64386	6.64386
D87011_at	6.64386	6.64386	6.64386	6.64386	6.64386	6.64386	6.64386	6.64386	6.64386	6.64386	6.64386	6.64386	6.64386	6.64386	6.64386	6.64386	6.64386	6.64386	6.64386	6.64386	6.64386	6.64386	6.64386	6.64386	6.64386	6.64386	6.64386	6.64386	6.64386	6.64386	6.64386	6.64386	6.64386	6.64386	6.64386	6.64386	6.64386	6.64386	6.64386	6.64386	6.64386	6.64386	6.64386	6.64386	6.64386	6.64386	6.64386	6.64386	6.64386
D87012_at	6.64386	6.64386	6.64386	6.64386	6.64386	6.64386	6.64386	6.64386	6.64386	6.64386	6.64386	6.64386	6.64386	6.64386	6.64386	6.64386	6.64386	6.64386	6.64386	6.64386	6.64386	6.64386	6.64386	6.64386	6.64386	6.64386	6.64386	6.64386	6.64386	6.64386	6.64386	6.64386	6.64386	6.64386	6.64386	6.64386	6.64386	6.64386	6.64386	6.64386	6.64386	6.64386	6.64386	6.64386	6.64386	6.64386	6.64386	6.64386	6.64386
D87023_cds2_at	9.62753	8.40088	7.88264	8.90388	8.73809	9.38802	8.66888	6.64386	8.07146	8.10329	7.93664	6.64386	8.39232	9.36851	7.69349	8.69349	8.83289	8.48784	9.24555	7.33985	8.88874	9.73809	8.87652	8.99152	8.62205	7.8392	9.71939	8.53528	9.65464	9.1472	7.30378	10.0471	10.4491	9.59059	9.13443	9.30834	8.91588	8.41785	9.26913	7.9542	8.45533	9.95274	8.09803	8.99435	8.13443	8.36632	9.43463	8.47573	8.16491
D87024_at	9.633	9.17742	7.11894	8.55459	8.16491	9.38802	8.35315	6.64386	7.85798	7.33985	8.35315	7.99435	8.29002	8.8392	7.93074	8.81378	7.92481	8.50779	11.0133	8.48382	8.83289	8.86419	8.0607	7.02237	9.40727	9.0607	9.7039	8.10329	8.88874	8.5157	7.21917	9.02237	9.38586	8.52356	8.64386	7.74147	9.41785	8.05528	9.42836	7.70044	8.60363	9.2384	8.49185	8.42626	8.76487	7.61471	8.66178	8.04439	7.59246
D87071_at	6.64386	8.45943	9.33762	9.28077	8.93369	8.30378	9.34873	8.49185	8.32193	10.0417	9.75322	6.64386	7.96	6.64386	9.28077	8.8392	6.64386	8.96867	6.64386	10.2912	8.44708	9.46964	8.9542	7.90689	10.6609	9.20701	9.94544	9.56224	11.1611	9.97441	7.34873	10.9629	12.0815	9.79928	6.64386	9.96867	6.64386	6.64386	9.12928	7.14975	9.49185	6.64386	8.98868	6.64386	7.74819	6.64386	9.2384	9.81858	7.78136
D87073_at	8.72792	8.82972	8.35315	8.3837	8.18488	8.90087	7.56224	7.83289	7.87036	8.27612	7.83289	7.63662	8.5157	8.27146	8.61471	7.90087	8.10329	8.08746	8.02237	8.07146	6.64386	8.49185	8.23362	7.44294	8.62571	7.44294	9.23362	7.71425	7.25739	6.91886	7.19967	9.40727	7.81378	8.08215	8.36194	8.07682	8.37938	8.28077	8.39232	7.78136	7.91289	9.62022	8.47168	7.87036	8.54689	7.14975	8.41363	8.76487	8.26679
D87074_at	6.64386	6.64386	6.72792	6.64386	6.64386	7.25739	6.64386	8.17991	6.98868	6.64386	7.52356	7.40939	6.79442	6.64386	6.64386	6.64386	6.64386	6.64386	6.64386	6.64386	6.64386	6.64386	6.64386	6.64386	6.64386	6.64386	6.64386	6.83289	6.64386	6.64386	6.64386	7.06609	6.64386	6.64386	6.64386	7.69349	6.64386	6.64386	7.76155	6.64386	6.64386	9.51175	8.57365	6.64386	7.78136	6.64386	6.65821	6.64386	6.64386
D87075_at	8.74483	6.64386	6.64386	7.98868	8.32193	6.64386	8.53916	6.64386	8	7.94251	6.64386	6.64386	7.17991	6.64386	8.08215	7.77479	7.01123	6.64386	8.27146	6.64386	6.64386	9.0954	6.64386	6.64386	7.86419	6.64386	6.90689	6.64386	6.64386	6.64386	7.40088	7.11894	8.7211	6.84549	7.91886	8.07682	8.64746	6.64386	8.09803	6.64386	6.64386	7.72792	6.64386	6.64386	8.44294	6.64386	7.49185	6.64386	7.81378
D87076_at	8.19967	8.88264	8.44294	9.75989	10.1098	10.1649	8.9542	6.64386	6.64386	8.73132	9.13955	7.01123	9.61655	7.6865	9.76487	10.4189	6.64386	8.67596	9.09011	7.85175	7.2854	8.43463	7.30378	6.64386	8.41785	7.25739	8.87344	6.64386	8.91588	6.64386	6.64386	6.64386	10.3298	6.64386	7.87036	7.62205	9.42417	9.31967	8.58871	9.32193	9.17493	10.1662	8.88874	6.64386	8.93958	6.64386	9.9263	8.28077	8.75154
D87077_at	6.64386	6.64386	7	6.74147	8.40088	6.64386	7.47573	6.64386	6.64386	6.64386	6.64386	6.64386	6.64386	6.64386	8.16993	7.62936	6.64386	6.64386	6.64386	6.64386	6.64386	6.64386	6.64386	6.64386	6.64386	6.64386	6.64386	6.64386	6.64386	6.64386	6.64386	6.65821	6.85798	7.78136	6.64386	7.12928	6.64386	6.64386	7.36632	6.64386	6.64386	7.09803	8.07682	6.64386	6.64386	6.64386	8.74819	7.07682	7.45943
D87078_at	7.24793	8.50383	6.64386	9.45327	10.5245	8.67948	9.74315	8.41363	8.87036	8.30834	6.64386	6.64386	6.72792	6.64386	9.92778	10.4429	8.64386	7.14975	8.64746	8.25267	6.64386	9.45327	6.64386	6.64386	8.90689	8.11374	6.64386	8.36194	6.83289	6.64386	6.64386	6.91886	9.75489	8.77149	9.2738	7.91886	9.56986	9.75656	9.62022	7.85175	9.59246	9.62205	9.59432	7.14975	8.39232	6.64386	10.2574	9.92481	10.2491
D87116_at	8.89178	7.33092	12.2688	9.24079	9.58496	9.224	8.54689	9.91588	8.59991	8.47978	9.20457	9.82018	9.01123	10.0307	10.1408	10.2119	10.1396	7.70736	8.47978	8.57365	9.98584	10.3465	9.84392	9.85798	9.30834	8.5812	8.01681	8.35755	9.9571	11.06	8.73132	10	10.2992	10.3465	8.31741	8.99718	7.94251	6.64386	9.60548	7.64386	6.64386	7.32193	7.80735	8.81698	7.62936	8.69697	9.50383	9.32418	9.17742
D87119_at	7.33092	7.21917	8.65464	6.64386	6.64386	9.40939	8.07682	7.63662	6.64386	6.64386	6.65821	9.24317	8.53528	8.25267	6.64386	8.60733	8.98014	6.64386	7.49185	6.64386	6.64386	6.64386	6.64386	7.53138	6.64386	6.64386	8.62571	6.64386	6.64386	6.70044	8.82655	8.26209	6.64386	6.64386	6.64386	6.64386	9.79928	6.64386	9.88874	7.46761	6.64386	7.67948	10.7004	9.11114	7.74147	6.85798	6.64386	11.1972	9.29232
D87120_at	6.64386	6.64386	6.64386	6.64386	6.64386	6.64386	7.06609	8.11894	6.64386	6.64386	6.64386	8.32643	6.64386	6.64386	7.02237	6.64386	6.64386	6.64386	6.64386	6.64386	6.64386	6.64386	6.64386	6.64386	6.64386	6.64386	6.64386	6.64386	6.64386	6.64386	6.64386	6.64386	6.64386	6.64386	6.64386	6.64386	6.64386	6.64386	8.39232	6.64386	6.64386	6.64386	6.64386	6.64386	6.64386	6.64386	6.64386	6.64386	6.64386
D87127_at	7.79442	6.84549	7.47573	8.36194	8.99435	6.64386	7.62205	8.03342	6.72792	6.64386	6.64386	6.64386	6.67243	6.78136	7.45121	8.62205	6.64386	7.01123	7.40088	7.89482	6.64386	7.81378	6.64386	6.64386	6.70044	6.64386	6.64386	6.94251	6.64386	6.64386	6.64386	6.71425	7.21917	6.96578	7.98868	6.87036	6.64386	6.64386	7.76818	6.64386	7.48382	7.6865	6.9542	6.75489	6.64386	6.64386	8.87652	7.35755	7.69349
D87258_at	6.64386	7.34873	6.64386	7.87652	8.14466	7.32193	6.64386	6.64386	6.64386	7.32193	6.64386	6.64386	7.22882	7.07682	6.64386	7.90087	6.64386	7.46761	7.97728	6.64386	6.64386	7.64386	8.17493	7.93074	8.19967	6.64386	7.37504	6.6865	7.8392	7.01123	6.64386	7.93074	8.13443	6.79442	7.46761	7.33092	8.06609	7.15987	7.2384	7.08746	7.93664	7.48382	8.05528	7.71425	7.48382	6.64386	7.47573	7.17991	7.2384
D87292_at	9.45943	8.93664	8.81378	9.17742	10.043	9.69523	9.69523	8.85487	9.69174	8.90388	9.61839	9.09276	6.88264	8.03892	10.6027	8.97154	8.00562	9.50779	9.85643	9.84862	9.10852	8.04985	8.40514	8.40088	10.5333	8.63662	8.25739	8.67596	8.88264	8.36632	10.1662	9.07948	9.59246	9.95274	9.48985	7.60733	7.04439	9.5411	9.66711	6.64386	9.95565	8.89482	6.64386	7.74147	6.64386	7.50779	9.11894	6.64386	9.37721
D87328_at	6.64386	6.64386	6.64386	6.64386	6.64386	6.64386	6.64386	6.64386	6.64386	6.64386	6.64386	6.64386	6.64386	6.64386	6.64386	6.64386	6.64386	6.64386	6.64386	6.64386	6.64386	6.64386	6.64386	6.64386	6.64386	6.64386	6.64386	6.64386	6.64386	6.64386	6.64386	6.64386	6.64386	6.64386	6.64386	6.64386	6.64386	6.64386	6.64386	6.64386	6.64386	6.64386	6.64386	6.64386	6.64386	6.64386	6.64386	6.64386	6.64386
D87432_at	6.64386	6.64386	6.64386	6.64386	6.64386	6.64386	6.64386	6.64386	6.64386	6.64386	6.64386	6.64386	7.26679	6.64386	7.12928	7.91886	8.36194	6.64386	6.64386	6.64386	6.64386	6.64386	6.64386	6.64386	6.64386	6.64386	6.64386	6.64386	6.64386	6.64386	6.64386	6.64386	9.35094	6.93074	6.64386	6.64386	6.98868	6.64386	6.64386	7.48382	6.64386	6.64386	6.79442	6.64386	6.6865	6.64386	6.70044	7.64386	6.64386
D87433_at	6.64386	6.64386	6.64386	6.87036	7.36632	6.64386	6.64386	6.64386	6.64386	6.64386	6.64386	6.64386	6.64386	6.64386	10.0941	6.64386	6.64386	6.74147	6.64386	10.021	10.7082	8.2854	9.5157	10.4778	6.64386	9.82972	9.18239	6.64386	6.64386	6.64386	6.64386	9.02791	13.75	11.8424	6.64386	6.64386	6.64386	6.64386	7.97728	6.64386	6.64386	8.26679	6.64386	6.64386	6.64386	10.9801	6.64386	6.64386	6.64386
D87434_at	7.69349	6.64386	6.64386	7.65105	8.52356	7.34873	7.59991	7.25739	6.79442	6.64386	7.19967	6.75489	8.11894	8.19967	8.04439	8.63662	9.18735	6.64386	7.7211	7.5157	7.98868	9.94544	9.11114	9.30378	8.19967	7.61471	8.04985	7.85175	7.37504	8.62571	7.60733	9.16742	8.86419	8.99152	7.83289	8.79442	6.64386	7.85798	8.02237	6.64386	7.66534	7.8009	7.27612	7.80735	7.22882	7.72792	8.7211	7.90087	8.36632
D87435_at	9.23601	7.44294	6.85798	8.37504	9.45327	9.61471	8.46352	7.53138	8.65821	7.11894	8.55075	6.64386	8.19967	9.09011	7.66534	9.0607	8.633	8.47573	9.0634	8.43045	7.62205	9.92333	7.02237	8.70736	9.12412	8.17991	9.78136	7.74147	8.62205	7.56986	8.12928	9.0954	10.3476	8.37938	9.67948	8.29002	9.76487	9.12928	9.13443	8.9629	9.84549	9.97154	9.49785	8.29921	9.24079	6.64386	8.3443	8.97441	8.75822
D87436_at	6.79442	7.7879	7.97154	7.14975	7.66534	7.48382	8.49586	8.46352	7.29462	6.64386	7.07682	6.64386	6.64386	6.64386	7.85175	8.03342	6.64386	7.06609	7.56986	7.29462	6.64386	7.90087	6.64386	6.64386	6.64386	6.64386	6.64386	7.05528	6.64386	6.64386	6.91886	7.90087	6.64386	6.64386	7.25739	6.70044	6.76818	8.29002	7.88874	6.64386	7.92481	7.91886	7.18982	6.64386	6.64386	6.64386	7.59246	7.67243	7.92481
D87437_at	10.3998	9.42206	10.2264	10.0014	10.3095	10.1357	8.65464	8.92184	9.03892	9.04712	9.47168	8.04439	9.57554	9.96867	9.48382	10.2889	9.83131	9.07948	9.02237	9.79604	8.52356	10.774	9.79928	10.2288	9.2503	8.40939	9.81218	9.30834	9.72281	9.29002	8.7039	10.3376	11.0841	9.69523	9.66888	10.3332	10.3095	9.94837	9.3966	9.71768	10.1293	9.92333	10.128	9.89785	10.3365	8.90087	10.3343	10.0741	9.93664
D87438_at	9.81057	9.04439	8.82337	8.57743	10.3038	10.0471	7.7211	7.16993	8.40514	8.17493	8.75154	9.47978	8.93664	7.99435	9.63118	9.86109	8.16491	8.64746	9.27612	8.40939	7.60733	9.98157	9.1267	9.11634	9.01402	7.09803	9.42836	8.75822	7.97154	7.94837	6.78136	9.9901	10.6384	9.88722	9.92184	8.18982	9.76487	9.35755	9	8.3966	10.4998	8.03342	8.47573	8.30378	8.48382	7.96578	10.1033	8.75489	8.79116
D87440_at	6.64386	6.64386	6.64386	6.64386	7.05528	6.64386	7.08746	6.64386	6.64386	6.64386	6.64386	6.64386	6.6865	7.56986	7.2854	6.64386	8.35755	6.64386	6.64386	6.64386	7.01123	7.88264	6.64386	6.64386	6.64386	6.64386	6.64386	6.64386	6.64386	6.64386	6.64386	6.64386	6.64386	6.64386	6.64386	6.64386	6.64386	6.64386	6.64386	6.64386	6.64386	6.64386	6.64386	6.64386	7.7879	6.64386	7.05528	6.64386	6.64386
D87442_at	9.87036	10.207	8.19476	9.1472	10.2784	6.64386	8.33092	6.64386	9.01681	9.224	9.6987	9.70044	8.23362	9.56415	8.46761	9.29002	8.64024	9.86573	9.84392	8.74483	9.5157	8.91289	10.4717	10.9651	10.0728	9.67772	9.04439	8.77149	9.84235	9.98868	9.78136	10.8471	11.0458	11.0478	10.2276	8.86728	10.0875	10.7406	9.10329	10.1331	10.7557	10.2819	10.2889	9.97154	8.54689	9.85175	9.92333	8.75489	9.13443
D87443_at	6.64386	6.64386	6.64386	6.64386	6.64386	6.64386	6.64386	6.64386	6.64386	7.72792	6.64386	6.64386	6.64386	6.64386	6.64386	6.64386	6.64386	6.64386	6.64386	6.64386	6.64386	6.64386	6.64386	6.64386	6.64386	6.64386	6.64386	6.64386	6.64386	6.64386	6.64386	6.64386	6.64386	7.63662	6.64386	6.64386	6.64386	6.64386	6.64386	6.64386	7.67243	7.74147	6.64386	6.64386	6.64386	6.64386	6.64386	6.64386	6.64386
D87444_at	6.64386	7.67243	6.64386	7.02237	6.64386	6.64386	6.64386	6.64386	6.64386	7.83289	6.64386	6.64386	6.64386	6.93074	6.64386	6.64386	6.64386	7.09803	6.75489	6.64386	6.64386	7.93074	8.14466	7.09803	6.64386	6.64386	6.64386	6.64386	8.48784	6.64386	6.64386	7.52356	12.6149	6.98868	6.64386	6.64386	7.34873	6.64386	6.64386	6.64386	6.64386	8.42626	6.94251	7.36632	6.64386	6.64386	6.96578	7.73471	6.64386
D87445_at	7.47573	7.69349	7.11894	8.17493	8.25267	8.05528	7.91289	6.80735	7.41785	7.50779	6.64386	6.64386	7.87652	8.03342	8.06609	6.64386	7.89482	7.63662	7.56986	7.29462	7.36632	8.75489	7.70736	8.05528	7.82018	6.96578	8.13443	6.84549	7.33985	6.91886	7.04439	8.21432	8.62571	7.76155	7.08746	6.71425	7.86419	7.56986	7.70736	7.44294	7.78136	8.58871	7.76155	7.59246	7.85798	7.07682	8.20457	7.63662	7.40939
D87446_at	6.64386	8.08746	7.55459	7.70044	8.87344	6.64386	8.41785	7.76818	8.30834	9.05799	6.89482	7.53138	7.49985	6.64386	9.37069	8.72451	7.89482	6.67243	7.60733	6.93074	6.90689	7.40939	6.70044	6.89482	8.98014	6.91886	6.64386	7.94837	7.60733	6.64386	7	8.62571	8.77808	8.96	8.25267	8.26209	7.15987	8.13955	8.60363	6.64386	7.65105	8.29462	7.9542	6.64386	7.35755	6.64386	8.94251	8.61471	8.51964
D87447_at	8.63662	6.87036	7.67243	8.57743	8.88264	8.01681	7.20945	8.59246	7.40939	8.67948	8.08215	6.64386	7.59991	8.81698	8.67948	8.80735	8.87958	6.64386	8.23362	6.64386	6.64386	8.27146	7.08746	6.76818	6.85798	6.64386	7.57743	7.63662	7.96	6.64386	7.26679	7.76155	6.64386	6.64386	7.86419	7.40088	7.50779	7.27612	8.29002	7.10852	7.7879	7.53138	8.18982	7.03342	6.91886	6.64386	8.70736	6.64386	7.82018
D87448_at	6.64386	6.84549	6.76818	6.64386	8.66178	6.64386	8.25267	6.9542	6.64386	6.64386	6.89482	6.64386	6.64386	6.67243	7.77479	7.10852	6.64386	6.64386	7.73471	7.29462	6.64386	6.64386	6.64386	6.64386	8.41785	6.64386	6.71425	6.90689	6.64386	6.64386	6.64386	6.64386	6.64386	6.64386	6.64386	7.10852	7.30378	7.67948	7.73471	7.26679	6.64386	6.64386	6.9542	6.6865	6.64386	6.64386	8.84235	7.59991	6.83289
D87449_at	6.64386	6.64386	7.99435	7.42626	8.59246	8.17493	7.9542	7.49185	7.70736	6.64386	6.64386	6.64386	7.78136	9.2738	8.08746	7.8392	7.35755	6.67243	8.15482	8.25267	6.64386	7.56224	7.53138	6.64386	7.34873	7.2384	8.49586	7.76818	7.58496	6.64386	6.64386	6.64386	6.64386	6.64386	7.93074	8.07146	7.39232	8.42626	7.41785	6.64386	8.41363	8.43879	7.36632	6.64386	7.09803	6.94251	6.98868	7.8009	7.96578
D87450_at	6.64386	7.11894	7.48382	8.39232	8.90388	6.64386	8.50779	6.64386	6.64386	7.71425	6.64386	6.64386	7.03342	7.10852	9.13186	8.37069	8.20457	7.44294	6.64386	6.64386	7.04439	8.14466	7.32193	7.40088	6.80735	6.64386	7.48382	7.39232	6.64386	6.64386	6.82018	8.41785	8.21917	8.02791	6.90689	7.97728	8.02791	8.25739	8.85798	6.64386	7.75489	7.40088	8.12412	6.64386	8.70044	6.64386	9.13955	8.30378	8.71768
D87451_at	9.90689	8.29002	11.8254	9.94398	10.7936	9.97728	9.67948	11.0217	10.3576	9.83447	10.0941	9.37938	10.3674	10.7372	10.3498	10.9315	10.1687	9.99859	10.0674	8.50383	9.93517	11.9473	10.9908	11.0573	11.3581	9.24079	10.8588	10.4645	10.7322	9.83605	9.48985	10.8994	9.75989	8.64386	10.1898	10.84	10.4998	10.2691	10.4252	9.95128	10.5584	11.0914	10.9593	10.4939	11.3493	9.39232	10.5294	10.7279	9.9542
D87452_at	8.19967	8.31741	9.05528	9.67419	10.0553	8.52356	9.31741	8.11894	9.2384	8.56224	8.21432	6.64386	8.99152	8.34873	8.99435	9.26913	10.098	7.96	8.78136	8.57365	6.64386	10.1485	9.30606	9.41363	9.10329	7.42626	7.93074	8.37938	7.08746	7.02237	6.64386	7.58496	10.1762	8.78136	7.78136	8.09276	6.64386	8.61102	9.31061	8.43463	8.97728	8.85487	8.48784	8.21917	9.45121	6.64386	9.59246	8.43879	9.58308
D87453_at	7.47573	8.67243	7.88264	8.90388	9.11894	8.97728	8.61102	7.2384	7.97728	8.36194	7.39232	8.24793	7.54689	8.03892	8.95128	9.35755	8.21432	8.97728	8.3966	7.36632	6.64386	8.18488	8.19476	7.64386	9.50779	8.41363	8.31288	8.5812	8.35315	8.46761	8.39232	8.46352	9.15228	7.15987	8.39232	7.97728	8.32643	9.24317	9.69174	7.8392	8.83605	7.82655	9.81218	8.54303	8.99152	6.64386	8.78463	8.86419	9.03617
D87454_at	6.64386	6.64386	6.64386	6.64386	6.64386	6.64386	6.64386	6.64386	6.64386	6.64386	6.64386	6.64386	6.64386	6.64386	6.64386	6.64386	6.64386	6.64386	6.64386	6.64386	6.64386	6.64386	6.64386	6.64386	6.64386	6.64386	6.64386	6.64386	6.64386	6.64386	6.64386	6.64386	6.64386	6.64386	6.64386	6.64386	6.64386	6.64386	6.64386	6.64386	6.64386	6.64386	6.64386	6.64386	6.64386	6.64386	6.64386	6.64386	6.64386
D87455_at	7.33092	8.37938	7.94837	9.03617	9.31741	8.2384	8.30834	8.22882	7.96578	7.48382	7.8009	7.7211	8.06609	7.49985	8.45121	8.76155	6.64386	8.42626	8.8392	7.73471	7.02237	8.35755	7.86419	7.77479	8.67596	7.74147	8.20945	7.71425	8.00562	7.70044	7.3837	8.73809	9.06609	8.91886	8.64024	8.64024	8.5157	8.5812	8.63662	7.70044	8.09276	8.77808	8.37938	7.92481	8.32193	6.64386	9.14466	8.35315	8.41785
D87457_at	6.64386	6.64386	6.64386	6.64386	8.01681	6.64386	7.36632	6.64386	6.64386	6.64386	6.64386	6.64386	6.64386	6.64386	8.08215	8.66178	6.64386	7.14975	6.64386	7.04439	6.64386	6.64386	6.64386	6.64386	7.91289	6.64386	7.08746	6.79442	8.07682	6.64386	6.64386	6.64386	6.64386	6.64386	6.64386	6.64386	6.64386	6.64386	7.32193	6.64386	6.64386	6.64386	6.64386	6.64386	7.16993	6.64386	7.50779	6.64386	6.64386
D87458_at	6.64386	6.64386	6.64386	6.64386	6.64386	6.64386	6.64386	6.64386	6.64386	6.64386	6.64386	6.64386	6.64386	6.64386	6.64386	6.64386	6.64386	6.64386	6.64386	6.64386	6.64386	6.64386	6.64386	6.64386	6.64386	6.64386	6.64386	6.64386	6.64386	6.64386	6.64386	6.64386	6.64386	6.64386	6.64386	6.64386	6.64386	6.64386	6.64386	6.64386	6.64386	6.64386	6.64386	6.64386	6.64386	6.64386	6.64386	6.64386	6.64386
D87459_at	7.55459	7.16993	6.64386	6.84549	8.37504	6.64386	6.64386	6.6865	6.64386	6.64386	7.72792	7.18982	6.64386	6.94251	8.02237	8.17493	6.64386	6.76818	7	6.64386	6.64386	6.91886	6.64386	6.64386	6.70044	6.64386	6.64386	6.64386	6.64386	6.64386	6.64386	6.64386	6.71425	6.64386	7.84549	6.64386	6.64386	8.29462	6.64386	6.64386	6.64386	6.88264	6.64386	6.64386	6.64386	6.64386	8.61839	6.64386	8.19476
D87460_at	10.1687	11.0403	9.64386	9.77149	9.81057	11.0715	9.58308	9.37721	9.47168	10.0941	9.00562	8.93958	8.65821	9.5216	9.05528	10.0375	8.83605	9.97441	9.70736	9.13955	9.23362	9.83763	8.7211	9.79604	10.4346	9.7364	10.3354	9.37938	11.8041	9.29921	8.66534	9.76155	10.3276	8.82655	10.0042	10.4083	10.3106	10.1189	9.53528	9.24317	10.2562	10.5098	9.79279	9.59246	8.99152	9.28771	9.24079	8.82655	7.91289
D87461_at	6.65821	6.64386	6.64386	6.64386	7.85798	6.64386	7.09803	6.64386	6.64386	6.64386	6.64386	7	6.64386	6.64386	7.25739	7.80735	6.64386	6.64386	6.64386	6.64386	6.64386	6.64386	6.64386	6.64386	6.64386	7.17991	6.83289	6.64386	6.64386	7	6.64386	6.64386	7.33985	6.64386	6.64386	7.27612	6.64386	6.64386	6.79442	6.64386	6.64386	6.64386	6.84549	6.64386	6.64386	6.64386	6.74147	6.64386	6.64386
D87462_at	10.3015	10.6018	8.98868	8.77149	9.17991	9.28077	9.48784	9.05799	9.54496	7.14975	9.46761	9.04166	9.44708	9.37938	9.33539	9.44915	9.51175	8.99718	8.71081	9.55459	8.6865	10.0168	9.91139	10.0914	9.11374	8.93369	8.93074	9.21189	9.17493	9.3966	8.97154	10.1408	11.0841	10.764	9.50978	10.1548	9.89178	9.38802	9.62936	9.8857	9.41574	11.0084	9.66	9.68299	9.25739	10.1228	9.39874	10.1624	9.43254
D87463_at	7.41785	7.2854	6.64386	6.64386	6.64386	6.64386	6.64386	6.64386	6.64386	6.64386	6.64386	6.64386	6.64386	6.64386	6.64386	6.64386	6.64386	6.64386	6.64386	6.64386	6.64386	6.64386	6.64386	6.64386	6.64386	6.64386	6.64386	6.64386	6.64386	6.64386	6.64386	6.64386	6.64386	6.64386	6.64386	6.64386	6.64386	6.64386	6.64386	6.64386	6.64386	6.64386	6.64386	6.64386	6.64386	6.64386	6.64386	6.64386	6.64386
D87464_at	8.29002	6.64386	6.64386	8.32643	8.61839	6.64386	6.96578	7.11894	6.64386	6.64386	6.76818	7.05528	7.16993	7.31288	8.51175	8.61839	6.64386	6.64386	6.64386	6.64386	8.16993	7.87036	6.64386	6.64386	8.52748	7.31288	7.62205	7.29462	7.97154	6.64386	6.64386	8.08215	9.19967	8.40939	6.64386	7.07682	9.17493	7.2854	7.82018	7.16993	6.70044	8.38802	8.72792	6.64386	6.64386	6.64386	8.61471	7.48382	7.64386
D87465_at	7.92481	6.64386	8.60363	8.89785	6.65821	8.47573	6.64386	6.64386	8.11374	8.35315	6.64386	7.86419	10.6312	9.39017	8.76487	10.2143	9.51373	6.64386	8.55075	6.64386	6.65821	9.91737	8.07146	6.64386	6.64386	7.27612	6.64386	6.70044	6.64386	6.64386	8.90087	7.80735	8.37938	8.33092	9.34873	10.1033	8.45533	6.64386	7.36632	6.64386	6.64386	7.70044	9.78463	8.54303	6.64386	6.64386	8.64386	12.2279	7.62936
D87466_at	7.26679	8.42626	7.07682	8.72792	9.61102	7.72792	6.87036	7.75489	6.64386	7.08746	6.64386	6.64386	7.33092	7.63662	7.20945	7.97154	7.96	7.42626	8.32643	7.8009	6.94251	7.58496	7.92481	7.91289	8.08746	6.64386	7.57743	6.88264	7.76818	6.93074	7.04439	8.42206	9.31515	8.08215	8.71425	7.45943	8.15987	8.44294	8.07682	7.85175	7.75489	8.18982	8.25267	7.31288	8.18982	6.76818	9.25267	8.21917	7.72792
D87467_at	8.12928	9.23601	7.8009	8.05528	8.00562	8.44708	6.96578	7.90689	6.98868	8.5157	6.64386	7.41785	7.72792	7.7211	7.59991	7.40939	7.40939	7.44294	7.56986	7.85175	7.97728	8.05528	8.70736	8.09276	7.82655	7.34873	7.75489	6.64386	7.76818	8.04985	6.64386	7.93074	8.61839	8.19967	8.12412	7.20945	8.64024	8.77808	7.66534	8.05528	8.18982	8.56986	8.28077	7.92481	8.16993	8.10329	7.29462	8.13955	7.84549
D87468_at	8.59246	6.64386	6.64386	6.64386	8.17991	6.64386	6.64386	6.64386	6.64386	6.80735	7.19967	6.64386	6.64386	6.64386	6.64386	6.64386	6.64386	6.64386	6.64386	6.64386	7.87652	8.48784	6.90689	8.40088	8.5812	6.64386	9.21917	6.64386	8.57365	6.64386	6.64386	9.27612	6.64386	8.47573	8.16491	6.64386	8.66888	6.64386	6.64386	6.64386	6.64386	8.37504	6.64386	6.64386	8.18982	6.64386	6.64386	6.64386	6.64386
D87469_at	8.36632	10.1497	7.42626	7.82018	8.26209	7.34873	8.39232	7.53138	7.6865	7.32193	7.96	7.67243	6.64386	6.6865	7.93664	7.90087	6.70044	6.64386	6.97728	7.5157	7.46761	8.79766	6.64386	7.96578	8.13955	8.00562	8.42206	6.64386	6.87036	7.62936	7.52356	8.633	9.21189	7.6865	7.86419	8.47978	8.19476	8.50383	7.32193	6.64386	9.40301	9.58684	8.86419	7.27612	7.84549	7.70044	7.62205	8.01681	7.56224
D87470_at	6.64386	6.65821	6.64386	6.64386	7.69349	6.64386	6.64386	6.64386	7.11894	8.03342	6.80735	6.64386	6.64386	6.64386	7.06609	8.25739	6.64386	6.64386	6.64386	6.64386	7.03342	7.33092	7.2854	6.64386	6.64386	6.64386	6.64386	7.05528	6.64386	7.10852	6.64386	6.83289	7.62205	6.64386	7.12928	7.30378	7.16993	6.64386	6.64386	7.3837	7.73471	6.64386	8.09276	6.64386	6.79442	6.64386	6.9542	6.87036	7.79442
D87673_at	9.03067	9.14975	9.65821	8.94544	8.82655	10.783	9.08746	9.63118	9.35094	9.44915	9.29921	8.82337	7.89482	9.47776	8.16491	9.49185	8.29462	7.56224	9.53916	9.72451	8.9542	9.06609	9.91439	10.5689	9.32643	8.65105	8.91289	8.09803	8.61471	8.65464	8.66534	8.59246	9.84706	9.41151	9.96723	9.76487	9.61839	9.98014	9.71425	9.41151	10.3163	10.375	10.2143	9.44294	8.46352	9.65464	6.64386	9.33985	9.69
D87682_at	6.64386	6.64386	6.64386	6.64386	6.64386	6.64386	6.64386	6.64386	6.64386	6.64386	6.64386	6.64386	6.64386	6.64386	6.96578	6.64386	6.64386	6.64386	6.64386	6.64386	6.64386	6.64386	6.64386	6.64386	6.64386	6.64386	6.64386	6.64386	6.64386	6.64386	6.64386	6.64386	8.3443	6.64386	6.64386	6.64386	6.64386	6.64386	6.64386	6.64386	6.64386	6.64386	6.64386	6.64386	6.64386	6.64386	6.64386	6.79442	6.64386
D87683_at	6.64386	7.54689	6.64386	6.64386	7.33092	7.25739	6.64386	6.64386	6.64386	6.64386	6.64386	6.64386	6.64386	6.64386	6.64386	6.64386	6.64386	6.64386	7.26679	6.64386	6.64386	7.5157	6.64386	6.64386	7.72792	6.64386	6.75489	6.64386	6.64386	6.64386	6.64386	7.74147	8.56605	6.64386	6.78136	6.64386	6.64386	6.67243	6.64386	7.62205	6.64386	6.70044	7.22882	6.64386	6.64386	6.64386	6.64386	7.54689	6.64386
D87684_at	7.98299	8.60733	8.65464	8.96	10.1774	8.91886	8.54689	7.94837	8.67948	8.55842	8.07682	7.36632	7.67948	9.0607	10.0154	9.46964	8.47978	7.16993	7.40088	7.45121	6.64386	10.2831	8.5157	8.02791	9.2384	6.94251	6.64386	8.02791	8.18982	7.64386	6.87036	9.04985	9.62753	7.06609	8.97441	9.62388	9.17742	8.14466	9.35755	8	7.89482	8.59991	9.29692	8.29462	10.1485	7.76155	9.97871	9.60177	9.40301
D87685_at	6.64386	7.05528	6.64386	8.09276	8.54303	6.64386	7.67948	7.09803	6.64386	6.87036	6.64386	6.64386	6.64386	7.76818	6.6865	7.57743	7.04439	6.64386	7.29462	6.64386	6.64386	7.84549	6.64386	7.50779	7.82655	6.64386	6.64386	6.96578	6.64386	6.64386	6.64386	7.30378	8.54689	6.90689	6.64386	6.9542	7.34873	7.12928	7.12928	6.64386	6.64386	6.64386	6.80735	6.64386	7.82655	6.64386	8.31741	7.63662	6.64386
D87735_at	12.8469	12.9724	13.0288	12.8082	13.1567	12.9826	13.2387	13.0049	13.4164	13.7973	13.1384	13.3159	13.263	12.9596	13.2864	13.3249	12.5404	12.791	12.8603	12.4936	13.0982	13.1808	13.0205	13.2202	13.4793	12.9816	12.5748	12.8059	13.0367	13.1496	13.1152	13.0936	12.3842	12.3644	12.6099	13.2497	12.7147	13.2318	13.4909	12.6145	12.6535	13.1301	13.285	12.9518	13.0549	13.2671	12.9883	13.0911	13.3501
D87742_at	6.98868	7.08746	6.64386	7.12928	7.7211	7.48382	6.94251	6.64386	6.64386	6.64386	6.64386	6.64386	7.16993	7.18982	7.53138	6.64386	6.82018	6.64386	7.7879	6.64386	6.64386	7.32193	7.04439	7.33985	6.64386	6.64386	6.83289	6.64386	7.15987	6.64386	6.87036	6.64386	6.85798	6.64386	6.64386	6.80735	6.97728	7.41785	7.45943	6.64386	7.24793	7.57743	6.64386	6.64386	6.83289	6.64386	7.09803	6.64386	6.97728
D87743_at	7.8392	6.64386	7.25739	7.44294	9.25267	7.11894	7.3837	7.50779	6.64386	7.93664	6.64386	6.64386	6.74147	7.62205	8.79766	8.51175	7.93664	6.64386	6.64386	7.75489	6.64386	8.40514	8.14466	7.76818	6.64386	6.64386	6.64386	6.88264	6.64386	6.93074	6.64386	7.59991	8.69349	6.64386	7.97154	7.20945	7.90689	6.64386	7.43463	6.64386	7.33092	7.72792	8.28077	6.64386	7.65105	6.64386	9.03067	7.45943	7.35755
D87845_at	6.88264	6.65821	6.94251	7.19967	7.24793	8.98584	7.58496	7.53138	7.62205	8.06609	7.59991	7.08746	7	7.10852	6.64386	6.64386	7.10852	7.65821	7.80735	6.83289	7.25739	8.30834	7.94837	7.62936	7.96578	6.64386	7.81378	7.55459	7.37504	6.64386	6.64386	7.8009	8.43879	8.50383	6.64386	8.45943	8.04985	8.44708	7.49985	8.32193	8.29921	8.41363	6.64386	6.96578	7.08746	7.6865	6.79442	7.17991	7.13955
D87937_at	6.64386	9.3966	9.82018	8.06609	6.64386	7.20945	6.64386	9.12928	6.64386	7.33985	6.64386	7.76818	6.64386	6.78136	9.17493	6.64386	7.39232	6.64386	6.64386	7.45121	6.64386	6.64386	6.64386	8.66178	8.07146	6.64386	7.59991	9.15987	7.2384	6.64386	7.88264	6.87036	6.64386	9.23362	6.64386	9.87498	8.13443	7.40088	7.72792	6.64386	6.64386	7.76155	6.64386	6.64386	8.32643	6.64386	6.65821	9.28309	6.71425
D87953_at	10.1536	10.0607	11.2568	9.89785	10.5925	10.2761	9.99435	9.44501	8.98014	10.3891	9.64566	9.36632	9.24555	11.218	11.2058	11.021	9.93958	9.78627	9.59246	9.68124	10.1824	11.1163	10.3805	11.3869	10.9418	10.865	10.5196	10.1849	11.1966	10.5594	8.61102	10.9607	11.1731	10.5265	9.89482	10.5411	10.3185	10.4073	10.4543	9.63662	10.3531	10.1573	10.3231	10.1111	9.85019	11.3783	10.403	9.90238	10.0768
D87957_at	6.64386	6.64386	6.64386	6.64386	6.64386	6.64386	6.64386	6.64386	6.64386	6.64386	6.64386	6.64386	6.64386	6.64386	6.64386	6.64386	6.64386	6.64386	6.64386	6.64386	6.64386	6.64386	6.64386	6.64386	6.64386	6.64386	6.64386	6.64386	6.64386	6.64386	6.64386	6.64386	6.64386	6.64386	6.64386	6.64386	6.64386	6.64386	6.64386	6.64386	6.64386	6.64386	6.64386	6.64386	6.64386	6.64386	6.64386	6.64386	6.64386
D87969_at	6.90689	8.09276	7.18982	8.24793	9.83605	6.64386	7.86419	7.83289	6.64386	7.50779	6.76818	6.64386	6.65821	6.76818	8.71768	8.224	6.64386	7.01123	7.6865	7.40939	7.92481	6.94251	6.64386	6.82018	8.17493	7.75489	6.64386	8.33539	6.65821	6.64386	6.64386	9.01402	9.14466	9.16491	8.29462	6.84549	8.00562	7.63662	8.71081	6.64386	7.59991	7.72792	6.64386	7	6.64386	6.64386	8.93074	8.23362	8.15482
D87989_at	9.11634	9.69174	9.1267	9.18982	10.2348	8.46761	9.61102	10.0553	9.09011	8.89785	9.78463	8.52748	8.81378	8.90388	9.18488	9.96723	9.18982	8.75154	8.29462	9.75489	9.72451	10.5177	9.52356	10.0389	9.88111	8.31288	9.05257	7.88874	9.49785	9.22159	9.11374	9.79928	9.60363	9.43463	9.43045	9.56415	9.54882	9.62936	9.82018	8.43463	9.29462	8.62571	9.75322	8.98299	8.95128	8.72451	9.92481	8.77808	9.82972
D88146_at	6.64386	6.64386	6.64386	6.64386	6.64386	6.64386	6.64386	6.64386	6.64386	6.64386	6.64386	6.64386	6.64386	6.64386	6.64386	6.64386	6.64386	6.64386	6.64386	6.64386	6.64386	6.64386	6.64386	6.64386	6.64386	6.64386	6.64386	6.64386	6.64386	6.64386	6.64386	6.64386	6.64386	6.64386	6.64386	6.64386	6.64386	6.64386	6.64386	6.64386	6.64386	6.64386	6.64386	6.64386	6.64386	6.64386	6.64386	6.64386	6.64386
D88152_at	6.64386	6.64386	6.64386	6.64386	6.64386	6.64386	6.64386	6.64386	6.64386	6.64386	6.64386	6.64386	6.64386	6.64386	6.64386	6.64386	6.64386	6.64386	6.64386	6.64386	6.64386	6.64386	6.64386	6.64386	6.64386	6.64386	6.64386	6.64386	6.64386	6.64386	6.64386	6.64386	6.64386	6.64386	6.64386	6.64386	6.64386	6.64386	6.64386	6.64386	6.64386	6.64386	6.64386	6.64386	6.64386	6.64386	6.64386	6.64386	6.64386
D88213_at	8.97154	8.65105	8.49185	8.64024	8.60363	9.31741	7.47573	8.26209	7.77479	8.7039	7.20945	6.94251	8.37938	8.81057	8.48784	8.55842	8.18982	8.12412	8.52356	7.94251	7.60733	9.08215	8.45533	8.3837	8.91588	8.37504	9.08746	7.69349	9.33316	8.30378	7.34873	8.71768	9.59805	8.55842	8.45533	8.5812	9.45327	8.03892	8.25739	7.76818	8.82972	7.88264	9.01959	8.19476	8.06609	7.5157	8.19476	7.96578	7.48382
D88270_at	10.9701	10.8162	11.6027	10.9099	13.3102	12.9146	11.923	11.9869	11.9436	12.7638	11.7723	11.6891	8.27612	10.9993	12.9427	12.6671	7.21917	10.5167	11.8277	13.0023	6.64386	6.64386	6.64386	6.64386	7.13955	6.64386	6.64386	6.64386	6.64386	6.64386	7.74819	7.58496	7.70044	6.64386	10.9403	7.62936	9.17742	12.253	11.7241	6.64386	10.5575	10.2854	6.64386	8.51175	6.64386	9.47573	12.8744	6.64386	12.3971
D88378_at	7.21917	7.14975	7.98868	7.54689	7.83289	7.24793	6.64386	7.7879	6.9542	8.01681	6.64386	7.11894	7.08746	7.48382	7.94837	7.86419	6.64386	6.64386	6.64386	7.55459	7.17991	6.94251	6.93074	7.05528	7.46761	6.87036	7.32193	6.64386	6.87036	6.64386	6.64386	7.74819	6.91886	6.64386	8.05528	7.43463	7.91289	6.64386	7.53138	6.64386	6.64386	7.21917	8	7.09803	7.34873	6.64386	7.64386	7.32193	7.53916
D88422_at	6.64386	6.64386	7.56224	6.71425	6.64386	6.64386	7.82018	8.97154	6.64386	6.64386	6.64386	6.87036	6.65821	6.64386	7.67243	7.47573	8.42206	7.54689	7.40088	8.66534	13.2035	9.73132	9.95855	11.9185	11.1299	10.973	10.5343	12.0283	7.12928	10.3955	6.72792	12.9306	9.36194	12.7551	7.33092	9.19967	7.69349	6.64386	8.3966	7.64386	6.64386	6.91886	6.98868	8.08746	6.64386	8.25739	6.64386	8.35755	7
D88460_at	6.64386	6.64386	6.64386	6.64386	6.64386	6.64386	6.64386	6.64386	6.64386	6.64386	6.64386	6.64386	6.64386	6.64386	6.64386	6.64386	6.64386	6.64386	6.64386	6.64386	6.64386	6.64386	6.64386	6.64386	6.64386	6.64386	6.64386	6.64386	6.64386	6.64386	6.64386	6.64386	6.64386	6.64386	6.64386	6.64386	6.64386	6.64386	6.64386	6.64386	6.64386	6.64386	6.64386	6.64386	6.64386	6.64386	6.64386	6.64386	6.64386
D88532_at	6.64386	6.64386	6.64386	7.59246	6.96578	6.64386	6.64386	6.64386	6.64386	6.64386	6.64386	6.64386	6.64386	6.64386	6.64386	7.16993	6.64386	6.64386	6.64386	6.64386	6.64386	6.64386	6.64386	7.41785	6.64386	6.64386	7.08746	6.64386	6.64386	6.64386	6.64386	6.64386	6.64386	6.64386	6.72792	6.64386	6.64386	6.64386	6.64386	6.64386	6.64386	6.64386	6.64386	6.64386	6.64386	6.64386	6.64386	6.64386	6.64386
D88613_at	9.49985	9.62936	7.7211	7.65105	7.59246	9.18488	7.99435	8.66534	8.25739	7.79442	8.41785	8.77149	7.62205	7.92481	7.62936	7.8392	7.76818	8.0607	8.33985	7.29462	7.85798	8.68299	7.93664	8.51964	8.29462	8.33092	8.92184	7.93664	9.18735	7.82655	7.63662	8.81057	9.64746	8.34873	9.50581	8.69349	9.12412	9.20945	8.18982	9.31741	9.48985	9.75656	8.90989	7.9542	8.81698	8.82972	7.3837	9.03067	7.87036
D88667_at	6.64386	6.64386	6.64386	6.64386	6.64386	6.64386	6.64386	6.64386	6.64386	6.64386	6.64386	6.64386	6.64386	6.64386	6.64386	6.64386	6.64386	6.64386	6.64386	6.64386	6.64386	6.64386	6.64386	6.64386	6.64386	6.64386	6.64386	6.64386	6.64386	6.64386	6.64386	6.64386	6.64386	6.64386	6.64386	6.64386	6.64386	6.64386	6.64386	6.64386	6.64386	6.64386	6.64386	6.64386	6.64386	6.64386	6.64386	6.64386	6.64386
D88795_at	7.55459	6.64386	6.64386	6.64386	6.64386	6.64386	6.64386	7.21917	6.64386	7.3837	6.64386	6.64386	6.64386	6.64386	6.64386	6.64386	6.64386	6.64386	7.2384	6.64386	6.64386	6.64386	6.64386	6.64386	7.07682	6.64386	6.83289	6.64386	6.70044	6.64386	6.64386	6.64386	7.98868	6.93074	6.64386	6.64386	7.45121	6.64386	6.64386	6.64386	6.64386	6.64386	6.64386	6.64386	6.64386	6.67243	6.64386	6.64386	6.64386
D88797_at	7.8392	7.09803	6.64386	6.64386	7.54689	7.32193	6.87036	6.64386	6.64386	7.32193	6.64386	6.75489	7.25739	6.78136	6.64386	7.09803	7.19967	6.64386	8.04985	6.64386	6.70044	7.33092	7.76155	7.06609	7.71425	6.64386	7.73471	6.65821	7.76818	6.64386	6.64386	6.84549	6.64386	6.93074	6.75489	6.87036	7.76818	7.24793	6.96578	6.65821	7.18982	6.64386	6.64386	6.79442	6.97728	6.64386	6.74147	6.74147	6.64386
D88799_at	6.64386	6.75489	7.33092	6.64386	6.64386	6.64386	7.16993	6.64386	6.64386	7.04439	6.64386	6.64386	6.64386	6.64386	6.64386	6.64386	6.93074	6.64386	7.60733	6.9542	6.64386	6.64386	6.64386	6.64386	6.64386	6.94251	6.64386	6.64386	6.64386	6.64386	6.64386	6.64386	8.21917	6.64386	6.91886	6.64386	6.64386	7.14975	6.64386	7.08746	6.67243	8.55459	6.64386	6.64386	6.64386	7.25739	6.64386	6.64386	6.64386
D89016_at	6.64386	9.47371	8.02791	8.37504	7.41785	11.239	9.09276	10.3309	8.78136	8.74147	8.25739	8.45943	9.49586	9.64205	9.50184	9.37721	9.24317	9.6987	9.83605	9.55459	9.37504	9.14466	9.13186	10.2773	9.89785	9.56605	10.115	9.54496	10.3912	9.26913	8.76155	9.97298	9.73302	9.06878	10.062	10.0526	9.16742	9.08746	9.43879	8.85798	10.2761	10.2668	10.0701	9.14975	9.69523	9.09803	9.07146	9.57365	9.67419
D89050_at	6.64386	6.64386	6.64386	6.64386	6.64386	6.64386	6.64386	6.64386	6.64386	6.64386	6.64386	6.64386	6.64386	6.64386	6.64386	6.64386	6.64386	6.64386	6.64386	6.64386	6.64386	6.64386	6.64386	6.64386	6.64386	6.64386	6.64386	6.64386	6.64386	6.64386	6.64386	6.64386	6.64386	6.64386	6.64386	6.64386	6.64386	6.64386	6.64386	6.64386	6.64386	6.64386	6.64386	6.64386	6.64386	6.64386	6.64386	6.64386	6.64386
D89052_at	9.46964	9.30606	10.2336	10.3923	10.5236	9.66888	10.0014	10.1497	10.128	10.4929	9.88417	10.3049	9.22159	9.88417	10.84	10.5565	10.1111	10.0835	9.85953	10.1624	11.2414	11.7903	10.0741	11.2808	11.2234	9.81698	10.1548	10.3443	11.2946	11.032	9.8933	11.3134	10.7262	10.7254	7.75489	10.6944	6.64386	9.92184	10.4221	6.64386	9.66356	9.22641	10.4969	7.8009	9.44708	9.9629	10.8634	8.13443	10.4051
D89077_at	6.64386	8.15987	6.64386	7.27612	8.40088	8.35315	7.70044	7.91886	6.64386	6.64386	6.75489	6.76818	6.64386	7.74819	8.23362	7.34873	8.91588	8.41785	8.79766	6.64386	8.85798	8.25739	7.70736	9.23362	9.50779	8.62571	8.64746	8.73471	7.15987	8.02237	6.64386	10.2715	9.13699	9.30378	6.64386	8.74819	9.50184	8.80413	8.81057	9.0634	8.04985	6.64386	9.29002	7.72792	8.17493	7.40088	7.89482	11.1762	8.32193
D89289_at	7.72792	6.64386	6.76818	7.02237	8.06609	8.49185	6.64386	8.16993	6.64386	6.64386	6.64386	7.06609	6.64386	6.64386	7.08746	7.93074	6.64386	6.64386	7.97728	7.33985	6.64386	6.64386	6.64386	6.64386	6.94251	6.64386	8.13443	6.64386	6.96578	6.64386	7.17991	7.02237	7.62205	6.64386	7.52356	6.64386	8.04985	7.02237	7.04439	7.63662	6.64386	7.67948	7.8009	6.64386	7.40088	6.64386	8.03892	8.66178	7.34873
D89501_at	8.76155	8.84235	6.64386	6.64386	6.64386	7.56986	6.64386	6.64386	7.26679	7.27612	6.64386	6.64386	6.64386	6.67243	6.64386	6.64386	6.64386	6.64386	7.96	6.64386	6.64386	6.64386	6.64386	6.64386	6.64386	6.64386	6.64386	6.64386	7.71425	6.84549	6.64386	7.53916	8.60733	6.64386	6.64386	6.64386	7.12928	7.22882	6.64386	7.75489	7.70044	7.70736	6.64386	6.88264	6.64386	6.64386	6.64386	6.64386	6.64386
D89667_at	10.5098	10.6996	10.2597	10.6484	11.3597	10.4231	10.8704	10.3597	11.0654	11.3174	10.2216	10.623	11.1111	11.1	11.1421	11.5622	10.567	10.1459	10.0084	9.60733	12.0841	11.8549	11.0835	11.7309	11.9465	11.0175	10.9542	10.8265	10.6348	11.5594	11.0341	11.7674	11.0808	11.5507	10.3117	11.8226	10.764	11.137	11.5579	10.2958	10.0808	10.6689	11.6087	10.7507	11.1636	10.7347	10.8408	10.9432	11.3454
D89858_at	7.88264	7.05528	6.64386	7.33092	8.33539	7.40939	6.80735	6.64386	6.6865	7.49185	8.08746	7.17991	7.42626	6.64386	6.64386	7.8392	7.21917	6.74147	7.97728	6.64386	7.7879	8.87652	7.67948	8.77479	7.65821	7.42626	7.43463	7.76155	6.64386	7.34873	6.64386	7.52356	7.45943	7.71425	7.90689	7.80735	7.84549	8.07682	7.43463	8.33539	7.45943	6.64386	8.90989	7.56986	7.06609	8.07682	8.29921	8.33092	6.98868
D89859_at	6.79442	6.64386	6.87036	7.06609	7.48382	7.50779	6.64386	7.18982	6.64386	7.09803	6.64386	6.64386	6.64386	7.09803	7.14975	6.6865	6.6865	6.64386	6.94251	6.64386	6.64386	6.64386	6.64386	6.65821	6.64386	6.64386	6.64386	6.64386	7.2854	6.64386	6.64386	7.27612	7.49985	6.98868	7.25739	7.25739	7.90689	6.64386	6.84549	6.65821	7.18982	6.64386	7.54689	6.64386	6.89482	6.64386	7.20945	7.39232	7.17991
D90064_at	6.64386	6.64386	6.64386	6.64386	6.64386	6.64386	6.64386	9.24793	6.64386	6.64386	6.64386	6.64386	6.64386	6.64386	6.64386	6.64386	6.64386	6.64386	7.3837	8.3443	6.64386	6.64386	6.64386	6.64386	6.64386	6.64386	6.87036	10.7228	6.64386	6.64386	6.67243	6.64386	6.64386	6.64386	6.64386	6.64386	6.64386	6.64386	6.64386	6.64386	6.64386	6.64386	6.64386	6.64386	6.64386	6.64386	6.64386	6.64386	6.64386
D90084_at	8.73809	8.73809	9.34651	8.92184	10.5603	9.44294	9.54689	9.13443	7.75489	9.57175	9.55459	8.32193	8.37504	8.7879	10.5018	9.83131	8.3443	8.64024	8.47168	8.71768	8.26209	8.65821	9.34651	9.04712	9.55459	7.79442	9.03617	8.93074	9.224	8.94837	9.07414	10.151	9.97011	9.3966	9.09011	8.93958	6.64386	9.42206	9.29002	8.61102	9	8.70736	9.91139	8.74483	8.27146	9.41363	9.59619	9.49985	9.14975
D90086_at	9.62388	9.633	9.35755	9.82814	10.5584	10.7211	9.64566	9.67772	9.35535	9.17991	9.20457	9.10329	8.78463	9.82177	10.3587	10.0674	8.36194	9.20212	8.80735	9.29232	8.76818	9.65105	9.24079	9.16491	10.1849	9.37938	9.95855	8.59991	9.77972	9.02237	9.17493	10.2796	9.22641	9.99577	9.89482	9.29692	9.78463	10.0444	10.2656	9.27612	10.4263	9.75322	9.56796	9.01123	8.97728	8.46352	10.1447	10.2854	10.0498
D90097_at	6.64386	6.64386	6.64386	6.64386	6.64386	6.64386	6.64386	6.64386	6.64386	6.64386	6.64386	6.64386	6.64386	6.64386	6.88264	6.64386	6.64386	6.64386	6.64386	6.64386	6.64386	6.64386	6.64386	6.64386	6.64386	6.64386	6.64386	6.64386	6.64386	6.64386	6.64386	6.64386	8.62571	6.64386	6.64386	6.64386	6.64386	6.64386	6.64386	6.64386	6.64386	6.64386	6.64386	6.64386	6.64386	6.64386	6.64386	6.64386	6.64386
D90209_at	11.1643	10.1935	11.7756	10.8525	10.2586	10.3848	10.9491	10.0498	11.0815	11.1662	10.3185	10.8887	11.5299	12.5452	12.0634	12.2741	11.9982	10.8704	9.38586	9.53916	10.5925	12.989	10.7756	11.0362	10.5953	9.47776	10.3387	9.8857	12.4707	11.2697	11.6257	10.8494	11.7112	10.983	10.0967	12.4139	11.4179	10.567	11.5211	10.9972	10.6786	10.6348	12.4011	11.7499	12.5826	10.5699	11.007	10.5058	10.8439
D90224_at	6.64386	6.64386	6.64386	8.42626	8.25739	6.64386	6.64386	8.53916	6.64386	6.64386	6.64386	6.64386	6.64386	6.93074	8.50779	6.64386	6.64386	6.64386	6.64386	6.64386	6.64386	6.64386	6.64386	6.64386	6.64386	6.64386	6.64386	6.64386	6.64386	6.64386	6.64386	6.64386	6.64386	6.64386	6.64386	6.64386	6.64386	6.64386	6.64386	6.64386	6.84549	6.64386	6.64386	6.64386	6.64386	6.64386	6.64386	6.64386	6.64386
D90276_at	8.92184	9.60363	8.67948	9.23601	9.0634	10.1649	8.15987	8.21917	8.18982	8.14975	7.56986	8.24317	9.00282	9.65642	9.19722	9.48985	8.95128	8.72792	9.27612	8.50383	8.18982	9.56033	9.43671	8.92184	8.37504	8.95128	10.0238	7.39232	9.75489	9.27146	7.71425	10.1124	10.4666	9.28309	9.66534	9	9.94105	8.89178	9.20212	8.07682	9.21189	8.93664	9.71768	8.97728	8.53138	7.7879	9.01402	8.54689	8.33092
D90282_at	6.64386	6.64386	6.64386	6.64386	6.64386	6.64386	6.64386	6.64386	6.64386	6.64386	6.64386	6.64386	6.64386	6.64386	6.64386	6.64386	6.64386	6.64386	6.64386	6.64386	6.64386	6.67243	6.64386	6.71425	7.72792	6.64386	6.64386	6.64386	6.64386	6.64386	6.64386	6.64386	6.64386	6.64386	6.80735	6.64386	6.64386	6.64386	6.64386	6.64386	6.64386	6.64386	6.64386	6.64386	6.64386	6.64386	6.64386	6.64386	6.64386
D90359_at	6.64386	6.64386	8.11374	6.64386	6.64386	7.39232	6.64386	6.64386	6.64386	6.64386	7.74819	6.64386	6.64386	6.64386	8.31288	6.64386	6.64386	6.80735	6.64386	7.09803	6.64386	6.64386	6.64386	7.52356	6.64386	6.64386	7.29462	6.64386	6.64386	6.64386	6.64386	6.94251	7.04439	7.08746	6.64386	6.64386	6.64386	6.64386	6.70044	6.65821	6.64386	6.64386	6.64386	6.64386	6.64386	6.64386	7.83289	6.64386	6.64386
H46990_at	6.64386	6.64386	6.64386	6.64386	6.64386	6.64386	6.64386	6.64386	6.64386	6.64386	6.64386	6.64386	6.64386	6.64386	6.64386	6.64386	6.64386	6.64386	6.64386	6.64386	6.64386	6.64386	6.64386	6.64386	6.64386	6.64386	6.64386	6.64386	6.64386	6.64386	6.64386	6.64386	6.64386	6.64386	6.64386	6.64386	6.64386	6.64386	6.64386	6.64386	6.64386	6.64386	6.64386	6.64386	6.64386	6.64386	6.64386	6.64386	6.64386
HG1019-HT1019_at	6.64386	9.21675	6.64386	6.64386	6.64386	8.93958	7.70044	6.64386	6.64386	6.64386	6.64386	6.64386	6.64386	6.64386	8.14466	6.64386	6.64386	6.64386	6.64386	6.64386	6.64386	7.45121	6.64386	6.64386	8.87344	6.64386	6.71425	7.74147	6.64386	6.64386	6.64386	6.64386	6.64386	7.59991	7.12928	6.64386	6.64386	6.64386	6.64386	6.64386	8.21432	6.64386	6.64386	6.64386	6.64386	6.64386	6.64386	7.96578	6.64386
HG1071-HT1071_at	8.07682	8.16993	6.64386	7.56224	7.59246	8.73809	6.64386	6.64386	6.98868	6.64386	7.01123	6.64386	6.64386	7.49985	7.19967	7.11894	7.01123	7.69349	8.03342	7.91289	7.40088	8.27146	7.96	8.03892	6.64386	7.47573	8.06609	7.66534	8.10329	7.59246	6.64386	7.42626	7.70044	7.53138	7.42626	7.22882	8.52356	8.35755	6.93074	7.65821	8.20457	8.14466	7.70736	7.76818	6.94251	7.15987	7	7.04439	6.64386
HG1078-HT1078_at	10.5236	11.1357	11.4939	10.5981	11.3504	12.4959	10.5831	10.5226	10.4838	9.68825	10.6036	10.5774	10.6909	11.1072	10.5127	11.1415	10.3117	9.8392	10.7499	10.8788	9.41151	11.4476	10.1874	9.67419	10.2384	9.90539	11.5043	10.567	11.268	10.1898	9.83763	11.7536	12.8094	12.1173	11.4569	11.062	11.8045	10.9159	9.85798	10.6582	11.4944	11.1222	10.585	10.3117	10.6768	10.4898	10.9651	11.3537	10.5196
HG1098-HT1098_at	6.64386	6.64386	6.64386	6.64386	6.64386	6.64386	6.64386	6.64386	6.64386	6.64386	6.64386	6.64386	6.64386	6.64386	6.64386	6.64386	6.64386	6.64386	6.64386	6.64386	6.64386	6.64386	6.64386	6.64386	6.64386	6.64386	6.64386	6.64386	6.64386	6.64386	6.64386	6.64386	6.64386	6.64386	6.64386	6.64386	6.64386	6.64386	6.64386	6.64386	6.64386	6.64386	6.64386	6.64386	6.64386	6.64386	6.64386	6.64386	6.64386
HG1102-HT1102_at	8.31288	7.9542	7.8392	7.8392	9.20212	8.12928	8.14466	8.41363	7.64386	7.71425	6.64386	7.31288	7.5157	8.69	8.25267	8.58496	9.25974	6.70044	7.90087	6.89482	7.94251	10.0375	8.73471	9.74987	10.341	7.67243	7.48382	8.32643	7.08746	7.63662	8.07146	9.87036	7.21917	8.67948	8.46352	9.03892	9.12153	8.56605	9.03342	6.64386	8.5812	8.11894	9.44708	7.47573	9.3966	8.18488	8.24317	8.11374	9.47573
HG1103-HT1103_at	6.64386	6.64386	6.64386	7.10852	7.56224	6.64386	6.64386	6.64386	6.64386	6.64386	6.64386	6.64386	6.64386	6.64386	7.87652	6.98868	7.02237	6.64386	6.64386	6.64386	6.64386	7.17991	7.20945	6.64386	6.74147	6.64386	6.64386	6.64386	7.04439	7.44294	6.64386	6.64386	7.04439	6.64386	7.31288	7.50779	6.67243	6.64386	7.2854	6.64386	6.64386	6.64386	7.71425	6.64386	7.14975	6.64386	6.82018	7.50779	6.64386
HG1111-HT1111_at	6.64386	7.11894	7.70044	6.64386	7.59991	7.30378	6.64386	6.64386	6.64386	6.64386	6.76818	6.97728	6.64386	6.64386	6.64386	6.64386	6.64386	7.29462	6.64386	6.64386	6.64386	8.18488	6.85798	7.13955	7.26679	6.64386	7.34873	6.64386	7.8009	6.64386	6.64386	7.05528	7.6865	7.53138	6.64386	6.74147	7.56224	7.64386	6.64386	7.14975	8.04985	6.64386	6.64386	7.35755	6.64386	6.64386	6.93074	7.80735	6.64386
HG1112-HT1112_at	10.1293	9.98157	10.2384	10.6671	11.8357	10.716	11.115	10.7748	11.0098	10.9069	9.31061	10.5821	10.5147	10.2408	11.0231	11.7715	9.59246	11.2402	10.7541	10.3542	9.20701	10.6644	10.0154	9.97441	11.9192	9.69174	9.98442	10.1472	10.1762	9.61655	11.3083	10.4073	9.86882	9.22159	10.5459	10.817	11.5152	11.242	11.7052	10.9121	10.6073	10.224	11.744	10.9593	11.3641	10.4939	10.8049	11.041	11.914
HG1116-HT1116_at	8.56224	9.15228	8.2854	8.98299	8.33539	10.0238	9.50978	9.71596	8.97154	9.21189	8.93369	9.96145	9.11634	8.53138	9.21917	9.13186	9.06609	8.81057	9.81858	8.57365	8.45533	10.1033	9.61471	9.50581	9.22882	8.20945	8.32643	6.90689	9.17493	8.99435	8.17493	9.49985	10.1624	8.95128	9.02237	9.07948	9.52943	9.44294	9.14975	9.27146	9.1267	9.17991	8.84235	8.7211	9.21189	9.00843	8.74819	9.4818	9.11374
HG1139-HT4910_at	6.64386	6.64386	6.64386	6.64386	6.64386	6.64386	6.64386	6.64386	6.64386	6.64386	6.64386	6.64386	6.64386	6.74147	6.64386	6.64386	6.64386	6.64386	7.42626	6.64386	6.64386	6.64386	6.64386	6.64386	6.64386	6.64386	6.64386	6.64386	6.64386	6.64386	6.64386	6.64386	6.64386	6.64386	6.72792	6.64386	6.64386	6.64386	6.64386	6.64386	6.64386	7.37504	6.64386	6.64386	6.64386	6.64386	6.64386	6.64386	6.64386
HG1148-HT1148_at	6.64386	6.64386	6.64386	6.64386	6.64386	6.64386	6.64386	6.64386	6.64386	6.64386	6.64386	6.64386	6.64386	6.64386	6.64386	6.64386	6.64386	6.64386	6.64386	6.64386	6.64386	6.64386	6.64386	6.64386	6.64386	6.64386	6.64386	6.64386	6.64386	6.64386	6.64386	6.64386	6.64386	6.64386	6.64386	6.64386	6.64386	6.64386	6.64386	6.64386	6.64386	6.64386	6.64386	6.64386	6.64386	6.64386	6.64386	6.64386	6.64386
HG1153-HT1153_at	10.716	11.9758	10.5137	11.811	12.1864	11.4372	11.5948	10.6184	10.29	11.8297	11.0681	11.543	10.5906	10.7465	12.2119	12.1013	11.23	11.4843	10.6266	10.8611	12.2423	11.5608	11.3151	12.0768	12.366	11.6671	10.7822	11.4671	11.1911	12.0924	11.9915	11.792	10.8857	11.5901	9.98868	11.6808	11.1699	11.7805	12.378	10.9159	10.7415	9.94837	12.0444	11.6671	11.3197	11.6156	11.888	11.4341	12.192
HG1155-HT4822_at	11.1504	10.6073	10.5934	10.4242	10.5245	11.6524	9.67596	10.4221	9.85331	10.1586	9.0954	9.61102	10.3565	10.5943	10.0154	10.403	10.1724	10.0634	10.7797	9.72451	9.55459	11.1687	10.7288	10.9024	10.7117	10.2082	11.6573	10.5632	10.9166	10.5632	9.42626	11.2438	11.7423	10.8842	11.0901	10.6101	11.2515	10.8431	10.1202	10.4969	10.8154	11.2562	10.7822	10.2946	10.224	10.0168	10.3432	10.4105	10.1472
HG1205-HT1205_at	6.64386	8.81057	8.82018	8.26679	7.71425	9.00562	7.91886	8.57743	7.15987	7.32193	7.99435	8.12928	6.64386	7.45121	7.85175	7.50779	6.82018	7.91886	8.62936	8.13955	6.64386	8.19476	8.50779	7.37504	6.91886	7.13955	8.43463	7.94837	8.18982	7.08746	8.11894	7.07682	9.52552	7.45943	7.97728	8.14975	8.19967	8.96867	7.26679	9.01402	8.17493	9.05528	8.04985	6.64386	7.35755	8.15482	7.10852	8.37069	7.36632
HG142-HT142_at	6.64386	6.64386	6.64386	6.64386	6.64386	6.64386	6.64386	6.64386	6.64386	6.64386	6.64386	6.64386	6.64386	6.64386	6.64386	6.64386	6.64386	6.64386	6.64386	6.64386	6.64386	6.64386	6.64386	6.64386	6.64386	6.64386	6.64386	6.64386	6.64386	6.64386	6.64386	6.64386	6.64386	6.64386	6.64386	6.64386	6.64386	6.64386	6.64386	6.64386	6.64386	6.64386	6.64386	6.64386	6.64386	6.64386	6.64386	6.64386	6.64386
HG1602-HT1602_at	9.45943	9.46148	8.50383	9.2738	9.11114	10.0417	8.07146	7.87652	8.63662	8.77808	7.62205	7.49185	8.633	8.85487	8.8857	8.57743	8.21917	8.86419	8.43045	8.02791	7.81378	9.73978	9.2503	9.60177	9.01402	8.0607	9.49185	6.64386	8.85487	9.03892	7.76155	9.71081	10.2935	9.78136	9.85798	9.24317	10.1712	9.80252	8.80735	9.45943	9.74483	10.4009	9.88874	8.82972	9.16491	8.79442	8.91289	9.27845	9.10066
HG1604-HT1604_at	6.64386	6.64386	6.64386	6.64386	6.64386	6.64386	6.64386	6.64386	6.64386	6.64386	6.64386	6.64386	6.64386	6.64386	6.64386	6.64386	6.89482	6.64386	6.64386	6.64386	6.64386	6.64386	6.64386	6.64386	6.64386	6.64386	6.64386	6.64386	6.64386	6.64386	6.64386	6.64386	6.64386	6.64386	6.64386	6.64386	6.64386	6.64386	6.64386	6.64386	6.64386	6.64386	6.64386	6.64386	6.64386	6.64386	6.64386	6.64386	6.64386
HG1612-HT1612_at	11.9862	10.6303	11.8138	11.2438	12.8287	11.4445	11.7172	11.1491	12.3115	11.3559	11.2216	10.7879	11.0341	12.3129	12.2249	12.425	12.8549	11.3587	11.6569	11.3554	9.34207	12.0077	9.02791	9.67066	9.43045	8.633	10.7279	9.76487	11.4009	10.5294	9.67772	10.4788	9.40939	10.6627	11.8792	11.4969	12.5498	11.4564	11.1072	11.9222	11.8622	11.9915	12.8609	12.2261	12.1053	10.4294	12.7657	11.0056	11.8486
HG1614-HT1614_at	11.3864	9.47371	10.3151	11.1306	11.4813	11.432	12.3086	10.9513	11.5221	11.2027	11.2161	11.8094	10.4615	11.0566	12.2246	12.2851	11.8102	11.3559	9.69523	10.6402	12.5784	10.0821	8.19476	9.55267	11.7624	10.4858	11.2697	10.0307	10.3276	11.4843	11.3242	11.4954	10.5333	11.2981	10.9031	9.96145	11.4481	11.6073	11.9915	10.8541	11.0498	8.3443	12.462	10.5421	10.697	10.2408	11.381	11.3592	11.8811
HG1649-HT1652_at	10.4429	11.0735	10.8376	10.7952	10.7415	11.7283	9.8009	9.53528	9.55651	8.15482	8.74819	9.57932	10.1935	10.3421	9.81538	9.00562	10.6689	10.0238	10.5362	11.1478	10.3902	10.7389	10.611	10.6129	10.5304	10.5962	10.3387	11.0974	8.98014	11.388	8.61839	11.2779	12.1424	12.3151	10.9701	9.28771	11.1376	11.6475	10.3848	10.7279	11.3788	11.1046	10.0888	11.4057	10.2312	10.2761	9.16239	10.7082	10.5887
HG172-HT3924_at	8.47978	7.49985	6.72792	7.60733	7.50779	8.55459	6.64386	6.64386	6.64386	6.64386	6.84549	7.32193	6.67243	8.49586	7.2384	7.62936	7.61471	7.06609	6.94251	7.98868	6.93074	8.35315	8.46761	8.56224	6.88264	7.25739	8.10329	6.64386	7.48382	7.54689	6.64386	7.12928	8.55459	7.93664	8.29921	7.59246	8.76155	7.7879	7.47573	7.94837	8.56224	8.23362	7.62205	7.09803	6.9542	7.14975	7.53138	8.01123	7.03342
HG1723-HT1729_at	9.10852	9.16993	8.42626	8.88264	8.90087	10.1898	7.6865	8.41363	6.64386	7.10852	7.44294	7.3837	8.52748	8.84235	8.5157	8.56986	8.33985	6.64386	8.7039	8.13955	8.64386	9.48583	8.44708	9.29462	8.69	8.35755	9.18239	8.45121	9.12153	8.51964	7.41785	9.33539	10.3805	9.34651	9.60177	8.83289	10.0688	9.37938	8.81378	9.03892	9.43671	9.14211	9.53722	8.93369	9.01123	8.33539	8.87652	9.03067	8.2854
HG1733-HT1748_at	6.64386	6.64386	7.55459	7.47573	6.64386	7.91886	6.64386	7.65105	6.64386	6.64386	7.22882	7.22882	8.66888	7.87652	6.64386	8.26679	6.64386	7.16993	6.64386	7.83289	6.64386	7.85798	8.30834	8.45943	6.97728	6.64386	6.64386	6.64386	7.93074	6.64386	6.64386	6.64386	6.64386	7.49185	7.93074	7.63662	9.1472	7.76818	6.64386	7	7.06609	6.89482	7.91289	7.69349	6.64386	7.48382	7.88874	6.64386	6.64386
HG174-HT174_at	6.64386	6.64386	6.64386	6.64386	6.64386	6.64386	6.64386	6.64386	6.64386	6.64386	6.64386	6.64386	6.64386	6.64386	6.64386	6.64386	6.64386	6.64386	6.64386	6.64386	6.64386	6.64386	6.64386	6.64386	6.64386	6.64386	6.64386	6.64386	6.64386	6.64386	6.64386	6.64386	6.64386	6.64386	6.64386	6.64386	6.64386	6.64386	6.64386	6.64386	6.64386	6.64386	6.64386	6.64386	6.64386	6.64386	6.64386	6.64386	6.64386
HG180-HT180_at	6.64386	6.64386	7.10852	7.66534	7.62205	6.64386	6.64386	6.64386	6.64386	6.64386	6.64386	6.64386	6.64386	6.64386	7.29462	8.14975	7.09803	6.64386	6.64386	6.64386	6.64386	7.83289	7.59246	6.64386	6.64386	6.64386	9.35535	6.64386	6.64386	6.64386	6.64386	6.64386	6.64386	6.64386	6.64386	6.64386	6.64386	6.64386	6.64386	6.64386	6.64386	6.64386	6.64386	6.64386	6.64386	6.64386	6.64386	6.64386	6.64386
HG1800-HT1823_at	13.8183	13.9658	13.9658	13.9658	13.9658	13.9658	13.9658	13.9658	13.9658	13.9658	13.8207	13.9658	13.9658	13.9658	13.9658	13.9658	13.9441	13.5523	13.9658	13.8549	13.9658	13.9658	13.9658	13.9658	13.9658	13.9658	13.4937	13.5265	13.9658	13.9658	13.9658	13.9658	13.9606	13.9658	13.9658	13.9658	13.9658	13.9658	13.9658	13.9658	13.9658	13.8924	13.9658	13.9658	13.9658	13.9658	13.9658	13.9658	13.9658
HG1804-HT1829_at	9.46557	8.73471	8.93369	8.66888	9.07414	9.89785	8.40088	7.93664	8.99718	8.67243	8.93074	9.30378	9.35094	9.15482	9.1267	9.68825	9.10329	8.99718	8.40514	9.01123	7.37504	9.12153	9.80574	9.80735	8.21432	8.21917	8.31288	7.06609	8.85487	8.62571	7.56224	9.26209	9.82655	8.12928	10.1306	9.88264	9.72962	10.2912	9.59805	9.55651	9.67243	8.26209	10.1007	9.34651	9.37069	8.86109	8.59246	9.35315	9.41785
HG1828-HT1857_at	6.64386	8.24793	7.86419	6.71425	8.10329	8.02237	6.64386	8.29462	6.64386	7.22882	6.64386	6.67243	6.75489	7.15987	7.09803	8.00562	7.49985	6.64386	8.64024	6.64386	6.75489	8.30834	8.01681	7.88874	8.15482	6.64386	6.64386	7.30378	7.48382	6.74147	6.64386	8.17493	8.90388	7.15987	8.10852	6.87036	8.19476	8.14975	7.88264	6.64386	6.64386	6.64386	6.64386	7.30378	6.93074	7.67948	7.21917	7.65105	7.43463
HG1862-HT1897_at	11.0961	10.8361	12.2049	11.7313	13.3112	11.5068	10.8234	10.825	10.8986	11.137	11.6147	11.3066	11.8796	12.224	12.0158	12.3845	11.5147	9.82337	11.2485	11.8001	10.2288	10.5459	9.70736	10.3674	10.8178	9.77149	10.6636	10.7082	10.8803	10.6917	11.769	12.2541	11.2264	11.1674	12.2252	11.3977	10.821	11.1706	11.4194	9.7211	10.8803	11.0341	11.5694	10.9278	9.84549	10.9278	13.2497	11.4712	11.3326
HG1869-HT1904_at	8.7039	9.91139	9.36413	9.66356	11.115	9.48382	9.55267	8.92184	10.2562	9.05528	9.65821	9.40727	8.69697	8.69	9.72281	9.72622	7.94837	8.94837	9.73809	10.3174	10.1163	8.9542	8.48382	9.17742	9.87652	9.10852	8.72451	8.89178	8.77149	9.28077	9.34207	10.098	9.21917	8.86728	9.78627	10.0782	10.9737	9.59059	9.57743	10.2095	9.63118	8.93664	10.9737	10.0566	9.78463	9.48985	10.2946	9.99152	9.77643
HG1872-HT1907_at	10.8106	10.2842	9.94691	10.062	10.7541	11.3191	9.15735	10.0914	11.3208	9.15987	10.1383	8.77149	11.1668	10.6821	10.058	10.6211	9.87191	10.1523	11.0244	10.9513	9.42206	10.9476	9.53916	13.2099	10.952	9.87805	11.3487	9.79442	10.4909	10.5459	9.65821	12.5338	11.6878	11.576	11.6184	10.2348	10.6448	10.0042	9.76653	9.58496	10.2444	10.8416	10.0224	9.83131	9.59059	10.1111	10.6493	10.3443	10.0403
HG1879-HT1919_at	8.40939	8.29002	8.36632	8.17493	9.16993	8.25739	7.43463	7.43463	7.40939	6.71425	8.39232	8.30834	7.91886	8.59619	8.49985	9.27146	9.33316	8.00562	8.59991	7.42626	7.35755	9.2854	8.60733	9.76984	8.64024	7.07682	8.5812	8.47573	8.47168	7.99435	7.85798	9.59432	9.44915	9.45327	8.64386	9.04439	8.69349	8.56605	8.33985	7.75489	8.77479	8.21917	8.59991	8.15482	8.85175	8.36194	8.44294	8.21917	7.66534
HG2028-HT2082_at	8.49985	9.23122	7.69349	8.74147	8.51175	9.93811	8.11894	8.03342	8.17493	7.01123	7.89482	7.88264	7.63662	7.96578	6.64386	7.58496	8.04985	8.53528	9.25739	7.93074	8	9.17742	8.38802	8.87652	9.19722	8.35755	9.40939	8.23362	8.88874	7.72792	7.71425	9.04985	9.72792	8.27612	8.87036	8.42626	9.36632	8.12928	7.47573	8.92778	9.39232	7.87652	8.97154	8.90087	8.45121	8.09803	7.75489	8.3837	7.69349
HG2036-HT2090_at	6.64386	6.96578	6.64386	7.06609	8.50779	6.6865	6.64386	6.64386	6.64386	6.64386	6.64386	6.64386	6.64386	6.64386	6.64386	7.76155	6.74147	7.65821	6.64386	6.64386	6.72792	6.64386	7.65105	7.09803	7.37504	6.64386	6.64386	7.71425	7.06609	6.64386	6.64386	6.88264	6.64386	7.01123	8.01123	8.07146	9.32867	8.19967	7.40939	8.07682	8.29921	6.64386	8.75822	7.21917	7.65821	7.93664	7.67948	8.67948	7.59991
HG2059-HT2114_at	9.79442	9.67066	9.53333	9.25503	10.0526	9.97154	9.04985	8.59246	9.44294	10.0901	9.72622	8.93664	9.67772	9.47168	9.96434	10.4305	8.73132	9.15228	9.50383	8.25267	9.4818	10.0914	9.59246	10.6275	9.94398	8.83605	9.71425	8.88874	9.95128	9.48382	8.36632	10.8925	9.91439	10.4336	10.1536	10.4707	10.1176	9.98442	10.0715	10.0728	9.91737	9.54303	10.0334	9.1267	9.35315	9.49386	9.33762	10.4409	9.92333
HG2152-HT2222_at	6.64386	6.64386	6.64386	6.64386	6.64386	6.64386	6.64386	6.64386	6.64386	6.64386	6.64386	6.64386	6.64386	6.64386	6.64386	6.64386	6.64386	6.64386	6.64386	6.64386	6.64386	6.64386	6.64386	6.64386	6.64386	6.64386	6.64386	6.64386	6.64386	6.64386	6.64386	6.64386	6.64386	6.64386	6.64386	6.64386	6.64386	6.64386	6.64386	6.64386	6.64386	6.64386	6.64386	6.64386	6.64386	6.64386	6.64386	6.64386	6.64386
HG2161-HT2231_at	6.64386	6.64386	6.64386	6.64386	6.64386	6.64386	6.64386	6.64386	6.64386	6.64386	6.64386	6.64386	6.64386	6.64386	6.64386	6.64386	6.64386	6.64386	6.64386	6.64386	6.64386	6.64386	6.64386	6.64386	6.64386	6.64386	6.64386	6.64386	6.64386	6.64386	6.64386	6.64386	6.64386	6.64386	6.64386	6.64386	6.64386	6.64386	6.64386	6.64386	6.64386	6.64386	6.64386	6.64386	6.64386	6.64386	6.64386	6.64386	6.64386
HG2167-HT2237_at	8.87036	10.0348	8.86728	7.75489	8.64386	8.80413	8.98868	8.55842	8.96867	7.96	8.20457	8.14975	9.32193	11.5231	9.80413	8.50779	9.22641	8.224	8.07682	7.27612	7.79442	8.76155	7.53138	9.56415	8.81378	7.19967	9.02791	8.32193	7.12928	9.97011	7.70044	11.0485	9.81378	11.1383	8.83289	9.41574	9.05257	8.81698	8.71081	7.82655	8.01123	9.93221	8.87344	8.19476	8.77808	9.26913	8.55075	8.73471	8.46352
HG2188-HT2258_at	6.64386	6.64386	6.64386	6.64386	6.64386	6.64386	6.64386	6.64386	6.64386	6.64386	6.64386	6.64386	6.64386	6.64386	6.64386	6.64386	6.64386	6.64386	6.64386	6.64386	6.64386	6.64386	6.64386	6.64386	6.64386	6.64386	6.64386	6.64386	6.64386	6.64386	6.64386	6.64386	6.64386	6.64386	6.64386	6.64386	6.64386	6.64386	6.64386	6.64386	6.64386	6.64386	6.64386	6.64386	6.64386	6.64386	6.64386	6.64386	6.64386
HG2190-HT2260_at	6.64386	6.64386	6.64386	6.64386	6.64386	6.64386	6.64386	6.64386	6.64386	6.64386	6.64386	6.64386	6.64386	6.64386	6.64386	6.64386	6.64386	6.64386	6.64386	6.64386	6.64386	6.64386	6.64386	6.64386	6.64386	6.64386	6.64386	6.64386	6.64386	6.64386	6.64386	6.64386	6.64386	6.64386	6.64386	6.64386	6.64386	6.64386	6.64386	6.64386	6.64386	6.64386	6.64386	6.64386	6.64386	6.64386	6.64386	6.64386	6.64386
HG2191-HT2261_at	6.64386	6.64386	6.64386	6.64386	6.64386	6.64386	6.64386	6.64386	6.64386	6.64386	6.64386	6.64386	6.64386	6.64386	6.64386	6.64386	6.64386	6.64386	6.64386	6.64386	6.64386	6.64386	6.64386	6.64386	6.64386	6.64386	6.64386	6.64386	6.64386	6.64386	6.64386	6.64386	6.64386	6.64386	6.64386	6.64386	6.64386	6.64386	6.64386	6.64386	6.64386	6.64386	6.64386	6.64386	6.64386	6.64386	6.64386	6.64386	6.64386
HG2228-HT2305_at	6.64386	6.64386	6.64386	6.64386	6.64386	6.64386	6.64386	6.64386	6.64386	6.64386	6.64386	6.64386	6.64386	6.64386	6.64386	6.64386	6.64386	6.64386	6.64386	6.64386	6.64386	6.64386	6.64386	6.64386	6.64386	6.64386	6.64386	6.64386	6.64386	6.64386	6.64386	6.64386	6.64386	6.64386	6.64386	6.64386	6.64386	6.64386	6.64386	6.64386	6.64386	6.64386	6.64386	6.64386	6.64386	6.64386	6.64386	6.64386	6.64386
HG2229-HT2306_at	6.64386	6.64386	6.64386	6.64386	6.64386	6.64386	6.64386	6.64386	6.64386	6.64386	6.64386	6.64386	6.64386	6.64386	6.64386	6.64386	6.64386	6.64386	6.64386	6.64386	6.64386	6.64386	6.64386	6.64386	6.64386	6.64386	6.64386	6.64386	6.64386	6.64386	6.64386	6.64386	6.64386	6.64386	6.64386	6.64386	6.64386	6.64386	6.64386	6.64386	6.64386	6.64386	6.64386	6.64386	6.64386	6.64386	6.64386	6.64386	6.64386
HG2247-HT2332_at	6.64386	6.64386	7	7.72792	6.87036	8.5157	7.42626	7.94837	8.41785	8.79766	7.37504	8.09276	6.87036	6.71425	6.64386	6.97728	6.64386	7.65821	8.12928	7.89482	6.75489	7.53916	7.59246	7.43463	8.19967	8.04985	6.64386	7.93664	6.64386	7.92481	7.7879	7.46761	7.45943	6.64386	7.7211	6.64386	8.66534	8.27612	7.01123	7.85798	8.60363	9.37721	8.44294	7.85175	6.64386	7.45943	6.64386	7.56224	6.64386
HG2261-HT2352_at	6.64386	6.64386	6.64386	6.64386	6.64386	6.64386	6.64386	6.64386	6.64386	6.64386	6.64386	6.64386	6.64386	6.64386	6.64386	6.64386	6.64386	6.64386	6.64386	6.64386	6.64386	6.64386	6.64386	6.64386	6.64386	6.64386	6.64386	6.64386	6.64386	6.64386	6.64386	6.64386	6.64386	6.64386	6.64386	6.64386	6.64386	6.64386	6.64386	6.64386	6.64386	6.64386	6.64386	6.64386	6.64386	6.64386	6.64386	6.64386	6.64386
HG2264-HT2360_at	8.66888	8.88874	7.71425	7.79442	7.39232	9.34651	8.21917	7.83289	8.08746	8.66178	7.62205	6.96578	7.19967	7.26679	7.88874	7.41785	7.45121	8.53528	8.31741	7.82018	7.33985	7.88874	8.67243	7.2384	7.90689	8.48784	7.64386	7.53138	8.33092	8.67596	6.97728	8.9542	9.3015	7.80735	9.13955	8.11894	8.84235	8.49985	7.29462	6.64386	7.81378	8.66534	8.94837	8.27612	7.53138	7.67948	7.5157	7.31288	7.11894
HG2274-HT2370_at	6.64386	8.00562	8.83605	8.54689	9.80413	8.81698	9.00282	8.11894	9.70736	7.97154	9.00562	8.75154	6.82018	7.91886	9.55842	8.94837	7.30378	9.05257	7.66534	8.5157	8.79766	8.14466	6.64386	6.64386	8.60363	7.13955	6.64386	6.64386	6.64386	8.82655	9.59432	6.80735	6.64386	6.64386	8.3837	9.37069	8.97728	6.89482	9.97441	8.55459	7.43463	6.64386	9.92926	9.44915	8.75822	8.20945	8.89178	8.88874	9.98584
HG2279-HT2375_at	11.4548	10.9915	11.2854	11.5641	12.2101	11.3993	11.9136	11.2633	12.617	11.4073	11.7532	11.1812	10.568	10.9908	12.3354	12.5297	11.4558	12.3078	11.5053	12.0234	13.2421	11.8903	11.9989	12.3049	12.2027	12.0931	12.0792	11.178	12.5442	12.4762	12.3565	12.9857	12.4858	12.1501	11.7511	12.1392	12.3995	11.6055	12.3112	12.1966	11.8138	10.6129	12.8366	12.9551	12.0495	11.5943	12.3482	11.5493	12.1286
HG2280-HT2376_at	10.2562	9.93958	9.35755	9.79116	9.66178	11.1389	9.55459	8.87036	9.44708	9.44708	9.01681	9.39232	9.76984	10.0634	9.72281	9.53138	9.45121	9.74987	10.1911	9.03067	9.84706	10.4808	10.2574	10.5575	9.84862	9.72962	10.352	8.49586	10.2656	10.2726	9.34207	10.4041	11.0748	9.9901	10.6564	9.78136	11.0362	10.3443	9.64205	10.0566	10.2456	10.1383	10.5372	10.1267	9.81378	9.54496	9.68124	9.85019	9.20701
HG2290-HT2386_at	9.36413	8.08746	8.62571	7.74147	7.31288	9.1267	7.06609	8.55842	8.06609	7.7879	6.64386	8.01681	7.20945	8.23362	7.37504	7.44294	7.62936	8.71081	7.8392	7.70044	7.58496	8.81378	8.7211	9.68299	9.00562	8.47168	9.49785	8.03892	8.5812	8.75822	7.43463	9.29002	10.0566	8.66888	9.39874	8.633	9.39017	9.18982	8.41363	9.13699	9.18982	8.28077	9.27612	9.29692	8.98299	8.21917	7.90087	8.62936	7.73471
HG2309-HT2405_at	6.64386	6.64386	6.64386	6.64386	6.64386	6.64386	6.64386	6.64386	6.64386	6.64386	6.64386	6.64386	6.64386	6.64386	6.64386	6.64386	6.64386	6.64386	6.64386	6.64386	6.64386	6.64386	6.64386	6.64386	6.64386	6.64386	6.87036	6.64386	6.64386	6.64386	6.64386	6.64386	6.64386	6.64386	6.64386	6.64386	6.64386	6.64386	6.64386	6.64386	6.64386	6.64386	6.64386	6.64386	6.64386	6.64386	6.64386	6.64386	6.64386
HG2314-HT2410_at	9.62388	6.64386	6.64386	6.64386	6.64386	6.64386	6.64386	6.64386	6.64386	6.64386	6.64386	7.22882	6.64386	6.64386	6.64386	6.64386	6.64386	6.64386	6.64386	6.64386	6.64386	7.06609	6.64386	7.06609	6.64386	6.64386	6.64386	6.64386	6.64386	6.64386	6.64386	6.64386	6.64386	6.64386	6.64386	6.64386	8.5157	6.64386	6.64386	6.72792	8.5812	6.64386	8.54303	6.64386	6.97728	7.04439	6.64386	6.64386	6.64386
HG2320-HT2416_at	9.9571	9.3443	8.99718	8.60733	9.9571	10.5999	8.0607	9.16993	8.53916	8.93958	8.69349	8.633	9.54496	9.62753	8.62571	9.55267	9.22882	9.44294	9.99294	9.17742	8.59991	10.2252	9.79279	8.93074	9.44915	8.9629	10.2491	8.37938	9.98299	9.64205	8.48382	9.56605	10.3476	9.88722	10.3072	9.23362	10.6883	9.98014	9.06609	8.05528	9.40514	9.46964	10.0334	9.96578	9.66888	8.55459	9.31288	9.75989	8.75154
HG2325-HT2421_at	10.2819	7.93664	9.17991	9.56224	9.94983	10.5157	8.89785	9.01959	9.11374	9.15987	8.82337	8.85798	9.68124	9.82972	9.79604	9.7211	9.47371	9.31288	10.0293	9.5157	7.35755	10.3421	9.51964	9.67419	9.56796	9.28771	9.99435	9.13699	9.86728	8.65464	8.8857	10.1124	10.0526	8.7039	10.0607	9.81057	10.4676	9.74483	9.37069	9.55651	10.0403	9.91289	9.91139	9.09011	9.49985	9.10329	9.81858	9.52943	9.27146
HG2339-HT2435_at	6.64386	6.64386	6.64386	6.64386	6.64386	6.64386	6.64386	6.64386	6.64386	6.64386	6.64386	6.64386	6.64386	6.64386	6.64386	6.64386	6.64386	6.64386	6.64386	6.64386	6.64386	6.64386	6.64386	6.64386	6.64386	7.40939	6.64386	6.64386	6.64386	6.64386	6.64386	6.64386	6.64386	6.64386	6.64386	6.64386	6.64386	6.64386	6.64386	6.64386	6.64386	6.64386	6.64386	6.64386	6.64386	6.64386	6.64386	6.64386	6.64386
HG2415-HT2511_at	8.14975	8.48382	7.26679	8.62571	8.27146	6.6865	7.2854	8.51964	8.63662	6.64386	8.07682	7.29462	8.31288	6.64386	7.48382	7.54689	8.18982	8.08746	7.98868	8.26209	6.64386	9.13186	8.53138	8.15482	6.64386	7.31288	7.89482	7.29462	7.71425	8.16993	8.67948	8.99435	8.75154	8.55842	7.26679	8.82018	8.85798	7.85798	8.71768	9.33316	6.64386	8.84549	9.54496	8.67243	8.86419	8.42206	7.91289	9.1472	8.45121
HG2416-HT2512_at	6.64386	6.64386	6.64386	6.64386	6.64386	6.64386	6.64386	6.64386	6.64386	6.64386	6.64386	6.64386	6.64386	6.64386	6.64386	6.64386	6.64386	6.64386	6.64386	6.64386	6.64386	6.64386	6.64386	6.64386	6.64386	6.64386	6.64386	6.64386	6.64386	6.64386	6.64386	6.64386	6.64386	6.64386	6.64386	6.64386	6.64386	6.64386	6.64386	6.64386	6.64386	6.64386	6.64386	6.64386	6.64386	6.64386	6.64386	6.64386	6.64386
HG2417-HT2513_at	7.31288	6.64386	7.14975	6.64386	7.70044	6.64386	6.64386	6.64386	6.64386	6.64386	6.64386	6.64386	6.64386	6.64386	6.64386	6.64386	6.64386	6.64386	6.64386	6.64386	6.64386	6.64386	7.02237	6.64386	6.64386	6.64386	6.64386	6.64386	6.64386	6.64386	6.64386	6.64386	6.64386	6.64386	6.64386	6.64386	6.64386	6.64386	6.64386	6.64386	6.64386	7.11894	6.64386	6.64386	6.64386	6.64386	6.64386	6.64386	6.64386
HG2442-HT2538_at	9.51767	8.69349	7.06609	6.64386	7.3837	9.09803	6.64386	6.64386	6.64386	6.64386	6.64386	6.64386	8.05528	8.19476	7.65821	8.45943	7.88874	8.09803	6.64386	6.64386	6.64386	7.93074	7.42626	6.64386	6.64386	6.64386	9.1267	6.64386	8.54689	6.74147	7.34873	7.5157	8.41363	6.64386	7.81378	7.8009	8.96578	6.64386	7.19967	7.07682	7.76818	6.64386	7.56986	7.24793	7.43463	6.64386	7.08746	8.01123	6.64386
HG2460-HT2556_at	6.64386	6.64386	6.64386	6.64386	6.64386	6.89482	6.64386	6.64386	6.64386	6.64386	6.64386	6.64386	6.64386	6.64386	6.64386	6.64386	6.64386	6.64386	6.64386	6.65821	6.64386	6.64386	6.64386	6.64386	6.64386	6.64386	6.64386	6.64386	6.64386	6.64386	6.64386	6.64386	6.64386	6.64386	6.64386	6.64386	6.64386	6.64386	6.64386	6.64386	6.64386	7.12928	6.64386	6.64386	6.64386	6.64386	6.64386	6.64386	6.64386
HG2463-HT2559_at	9.49386	9.05257	9.14975	8.33539	8.90989	9.23122	8.32193	9.31967	8.87958	7.75489	8.26209	8.94544	9.78136	9.71253	9.34873	9.03617	10.0728	7.87036	7.40088	8.04439	7.94251	10.236	8.73471	9.77972	7.74819	8.03892	6.64386	8.59991	8.97154	9.26209	9.05528	9.45738	8.02237	8.45943	8.96	8.90087	8.59619	8.49985	9.54303	9.01402	8.51964	8.65464	8.85798	9.42836	10.2633	10.7977	8.3837	8.24793	8.3837
HG2480-HT2576_at	9.07682	8.72451	8.58496	6.64386	7.8392	9.57365	7.86419	8.45121	8.45533	8.43879	7.93074	8.30834	8.54303	8.07682	8.37069	8.35755	7.66534	8.36194	8.93369	8.30834	7.14975	8.33092	8.29921	8.25739	8.29002	8.7879	10.0362	8.41363	10.1293	7.76818	7.67243	8.53528	9.42626	8.41785	8.43045	8.7879	8.47168	8.13955	8.37504	8.06609	8.41363	8.48382	8.92184	8.13955	7.8392	7.33985	7.35755	8.47573	7.34873
HG2492-HT2588_at	6.64386	6.64386	6.64386	6.64386	6.64386	6.64386	6.64386	6.64386	6.64386	6.64386	6.64386	6.64386	6.64386	6.64386	6.64386	6.64386	6.64386	6.64386	6.64386	6.64386	6.64386	6.64386	6.64386	6.64386	6.64386	6.64386	6.64386	6.64386	6.64386	6.64386	6.64386	6.64386	6.64386	6.64386	6.64386	6.64386	6.64386	6.64386	6.64386	6.64386	6.64386	6.64386	6.64386	6.64386	6.64386	6.64386	7.80735	6.64386	6.64386
HG2507-HT2603_at	6.64386	6.64386	6.64386	6.64386	6.64386	6.64386	6.64386	6.64386	6.64386	6.64386	6.64386	6.64386	6.64386	6.64386	6.64386	6.64386	6.64386	6.64386	6.64386	6.64386	6.64386	7.49185	6.88264	6.64386	6.64386	6.64386	6.64386	6.64386	6.64386	6.64386	7.08746	6.64386	6.64386	6.64386	6.64386	6.64386	6.64386	6.64386	6.64386	6.64386	7.59246	6.64386	6.64386	6.64386	6.64386	6.64386	6.64386	6.64386	6.64386
HG2525-HT2621_at	8.62571	10.1586	8.86728	8.74819	8.15482	9.15735	7.42626	6.64386	6.64386	6.64386	8.25739	7.2854	8.38802	8.49586	7.89482	7.82655	7.76818	7.14975	7.88264	6.79442	8.29002	9.17243	8.58496	8.55842	8.05528	7.29462	8.7879	8.24793	8.55842	8.3443	6.64386	9.35315	10.5546	8.79442	8.76818	9.40727	9.30378	9.47168	8.55842	8.67948	9.31061	9.0634	9.85175	8.85175	8.8009	7.37504	8.16491	8.61471	8.33985
HG2530-HT2626_at	6.64386	6.64386	6.64386	6.64386	6.64386	6.64386	6.64386	6.64386	6.64386	6.64386	6.64386	6.64386	6.64386	6.64386	6.64386	6.64386	6.64386	6.64386	6.64386	6.64386	6.64386	6.64386	6.64386	6.64386	6.64386	6.64386	6.64386	6.64386	6.89482	6.64386	6.64386	6.64386	6.64386	6.64386	6.64386	6.64386	6.64386	6.64386	6.64386	6.64386	6.64386	6.64386	6.64386	6.64386	6.64386	6.64386	6.64386	6.64386	6.64386
HG2538-HT2634_at	7.26679	6.76818	6.64386	7.66534	6.78136	6.94251	6.64386	6.64386	6.71425	8.15482	6.64386	6.64386	6.64386	6.78136	6.64386	6.64386	6.64386	7.01123	6.64386	6.64386	6.64386	6.64386	6.9542	7.30378	7.36632	6.80735	6.64386	6.90689	6.64386	6.64386	6.64386	6.64386	6.64386	6.64386	6.64386	6.70044	6.98868	7.26679	6.64386	6.64386	6.89482	7.97154	6.64386	6.64386	6.64386	6.64386	6.64386	6.64386	6.64386
HG2566-HT4867_at	11.5817	10.7039	10.7879	10.6555	10.6475	11.9596	10.6768	10.8502	10.9278	10.983	10.1215	10.7296	10.8956	10.5536	10.6493	10.5953	10.4838	10.6839	11.3587	10.5479	10.4409	11.6484	11.3432	11.6733	10.9091	10.7838	11.4589	10.8857	9.56224	11.1818	9.69349	11.3197	11.9174	11.1935	11.2929	10.7887	11.7616	11.42	10.403	11.0661	11.576	11.849	11.6448	11.0728	10.7532	10.8242	10.4062	10.6917	10.5108
HG2573-HT2669_at	6.64386	6.64386	6.64386	6.89482	6.64386	7.77479	7.14975	7.43463	6.64386	7.09803	6.65821	6.90689	8.02237	6.64386	7.94251	6.94251	6.64386	7.3837	7.62936	6.64386	6.64386	7.46761	7.08746	7.7211	6.64386	6.64386	6.64386	6.64386	7.41785	6.64386	6.64386	6.64386	7.91289	6.93074	7.40939	7.55459	6.64386	7.3837	6.82018	6.64386	6.70044	6.64386	7.18982	6.75489	6.64386	6.64386	6.89482	7.48382	6.78136
HG25930-HT26386_at	6.64386	7.52356	6.64386	6.64386	6.64386	9.24793	6.64386	6.64386	6.64386	6.64386	6.64386	6.64386	6.64386	6.64386	6.64386	6.64386	6.64386	6.64386	6.64386	6.64386	6.64386	6.64386	6.64386	6.64386	6.64386	6.64386	6.64386	6.64386	6.64386	6.64386	6.64386	6.64386	8.42626	6.64386	6.64386	6.64386	6.64386	6.64386	7.91886	6.97728	8.98014	6.64386	7.45943	6.75489	6.64386	6.64386	6.64386	6.64386	6.64386
HG2602-HT2698_at	6.64386	7.34873	6.64386	6.87036	6.64386	6.64386	6.64386	6.64386	6.64386	6.64386	8.19476	7.05528	6.64386	6.64386	6.64386	6.64386	6.64386	7.59991	7.70044	6.64386	6.64386	8.47573	6.90689	8.62936	7.21917	6.64386	6.64386	6.64386	6.64386	6.64386	6.64386	8.48784	6.64386	6.64386	6.64386	6.64386	8.17991	7	6.64386	7.16993	6.9542	9.3015	8.16993	6.64386	6.64386	7.05528	6.64386	6.64386	6.64386
HG2604-HT2700_at	6.64386	6.64386	6.64386	6.64386	6.64386	6.64386	6.64386	6.64386	6.64386	6.64386	6.64386	6.64386	6.74147	6.64386	6.64386	6.87036	6.64386	7.06609	6.64386	6.64386	6.64386	7.48382	6.64386	6.64386	7.45943	6.94251	6.64386	6.64386	6.64386	6.64386	6.64386	6.64386	6.64386	6.64386	6.64386	6.64386	6.64386	6.64386	6.64386	6.64386	6.64386	6.64386	6.64386	6.64386	6.64386	6.64386	6.64386	6.64386	6.64386
HG2614-HT2710_at	8.61102	7.67243	6.64386	8.16491	8.23362	9.2384	7.35755	6.64386	7.35755	6.64386	7.59991	7.20945	8.12412	8.55842	6.64386	8.19967	6.64386	8.33985	7.18982	7.64386	8.02791	8.65821	8.56224	8.13955	8.12412	7.88874	8.04985	6.64386	8.2854	8.61471	6.64386	8.88874	9.37938	8.81057	7.97154	8.43045	8.89785	8.44708	8.07682	6.64386	8.17493	8.19476	8.05528	8.40088	7.90689	7.12928	8.31741	7.78136	8.03892
HG2662-HT2758_at	6.64386	6.64386	6.64386	6.64386	6.64386	6.64386	6.64386	6.64386	6.64386	6.64386	6.64386	6.64386	6.64386	6.64386	6.64386	6.64386	6.64386	6.64386	6.64386	6.64386	6.64386	6.64386	6.64386	6.64386	6.64386	6.64386	6.64386	6.64386	6.64386	6.64386	6.64386	6.64386	6.64386	6.64386	6.64386	6.64386	6.64386	6.64386	6.64386	6.64386	6.64386	6.64386	6.64386	6.64386	6.64386	6.64386	6.64386	6.64386	6.64386
HG2663-HT2759_at	6.64386	6.64386	6.64386	6.64386	7.12928	7.96578	6.64386	6.64386	7.08746	8.53138	6.64386	6.64386	6.64386	6.64386	6.64386	6.64386	6.64386	6.64386	7.21917	6.64386	6.64386	6.64386	7.86419	6.64386	7.67243	6.64386	6.64386	6.64386	7.21917	6.64386	6.64386	7.2854	6.64386	6.64386	6.64386	6.64386	7.73471	6.64386	6.64386	6.64386	6.97728	6.91886	6.94251	6.64386	6.64386	6.64386	6.64386	6.64386	6.64386
HG2668-HT2764_at	9.89633	9.70908	9.25739	8.72792	9.25503	10.1573	8.11374	8.61102	9.35094	8.79442	8.15482	8.37069	8.98014	9.46148	9.13443	9.14211	8.24317	8.90388	9.32867	8.97441	9.14211	9.57932	9.31061	9.32867	9.14211	8.51964	9.74651	8.04439	9.67772	9.15735	8.09276	9.80252	10.0782	9.45943	9.24793	8.87344	10.0993	9.49386	8.82337	8.92778	9.56224	9.59246	9.48382	9.56605	9.10591	8.26679	9.15987	9.10329	8.79116
HG2686-HT2782_at	6.64386	6.64386	6.64386	6.64386	6.64386	6.64386	6.64386	6.64386	6.64386	6.64386	6.64386	6.64386	6.64386	6.64386	6.64386	6.65821	6.64386	6.64386	6.64386	6.64386	6.64386	6.64386	6.64386	6.64386	6.64386	6.64386	6.64386	6.64386	6.64386	6.64386	6.64386	6.64386	6.64386	6.64386	6.64386	6.64386	6.64386	6.64386	6.64386	6.64386	6.64386	6.64386	6.64386	6.64386	6.64386	6.64386	6.64386	6.64386	6.64386
HG2689-HT2785_at	6.64386	6.64386	6.64386	6.64386	6.64386	6.64386	6.64386	6.64386	6.64386	6.64386	6.64386	6.64386	6.64386	6.64386	6.64386	6.64386	6.64386	6.64386	6.64386	6.64386	6.64386	6.64386	6.64386	6.64386	6.64386	6.64386	6.64386	6.64386	6.64386	6.64386	6.64386	6.64386	6.64386	6.64386	6.64386	6.64386	6.64386	6.64386	6.64386	6.64386	6.64386	6.64386	6.64386	6.64386	6.64386	6.64386	6.64386	6.64386	6.64386
HG270-HT270_at	6.64386	6.64386	6.64386	6.64386	6.64386	6.64386	6.64386	6.64386	6.64386	6.64386	6.64386	6.64386	6.64386	6.64386	6.64386	6.64386	6.64386	6.64386	6.64386	6.64386	6.64386	6.64386	6.64386	6.64386	6.64386	6.64386	6.64386	6.64386	6.64386	6.64386	6.64386	6.64386	6.64386	6.64386	6.64386	6.64386	6.64386	6.64386	6.64386	6.64386	6.64386	6.64386	6.64386	6.64386	6.64386	6.64386	6.64386	6.64386	6.64386
HG2706-HT2802_at	6.64386	6.64386	6.64386	6.64386	6.64386	6.64386	6.64386	6.64386	6.64386	6.64386	6.64386	6.64386	6.64386	6.64386	6.64386	6.64386	6.64386	6.64386	6.64386	6.64386	6.64386	6.64386	6.64386	6.64386	6.64386	6.64386	6.64386	6.64386	6.64386	6.64386	6.64386	6.64386	6.64386	6.64386	6.64386	6.64386	6.64386	6.64386	6.64386	6.64386	6.64386	6.64386	6.64386	6.64386	6.64386	6.64386	6.64386	6.64386	6.64386
HG2707-HT2803_at	6.64386	6.64386	6.64386	6.64386	6.64386	6.64386	6.64386	6.64386	6.64386	6.64386	6.64386	6.64386	6.64386	6.64386	6.64386	6.64386	6.64386	6.64386	6.64386	6.64386	6.64386	6.64386	6.64386	6.64386	6.64386	6.64386	6.64386	6.64386	6.64386	6.64386	6.64386	6.64386	6.64386	6.64386	6.64386	6.64386	6.64386	6.64386	6.64386	6.64386	6.64386	6.64386	6.64386	6.64386	6.64386	6.64386	6.64386	6.64386	6.64386
HG2709-HT2805_at	6.94251	8.51964	7.91289	6.64386	8.15482	7.53138	7.09803	7.21917	7.34873	6.64386	7.35755	6.64386	7.10852	6.64386	7.2384	7.44294	6.88264	6.64386	7.8392	6.64386	6.74147	7.05528	8.21432	6.64386	6.64386	6.64386	6.64386	6.64386	6.65821	7.46761	6.64386	7.08746	9.17991	9.04439	6.9542	8	8.39232	7.53916	7.91886	8.5157	8.2854	8.6865	8.37938	6.91886	6.64386	6.64386	7.06609	8.43879	8.224
HG2714-HT2810_at	6.64386	6.64386	6.64386	7.04439	6.64386	6.64386	6.64386	6.64386	6.64386	6.64386	6.64386	6.64386	6.64386	6.64386	6.64386	6.64386	6.64386	6.74147	6.64386	6.64386	6.64386	6.64386	6.64386	6.64386	6.64386	6.64386	6.64386	6.64386	6.64386	6.64386	6.67243	6.64386	6.64386	6.64386	6.64386	6.64386	6.64386	6.64386	6.64386	6.64386	6.64386	6.64386	6.64386	6.64386	6.64386	6.64386	6.64386	6.64386	6.64386
HG2715-HT2811_at	9.92926	8.54689	9.70044	8.79116	9.87036	10.4315	8.15987	8.55842	8.50383	7.32193	8.61102	8.84235	9.33539	9.39874	9.224	9.22159	8.49586	9.85019	9.16993	7.93074	9.19229	10.6248	9.77808	10.0168	9.09011	7.97154	9.56415	8.82972	9.55842	8.25739	8.02237	10.5236	10.8065	8.94544	10.268	9.69	10.352	9.90689	8.59246	9.87344	9.76984	9.87805	10.2204	8.69	9.87958	8.48784	9.90839	10.0768	8.41363
HG2723-HT2819_at	6.64386	6.64386	6.64386	6.64386	6.64386	6.64386	6.64386	6.64386	6.64386	6.64386	6.64386	6.64386	6.64386	6.64386	6.64386	6.64386	6.64386	6.64386	6.64386	6.64386	6.64386	6.64386	6.64386	6.64386	6.64386	6.64386	6.64386	6.64386	6.64386	6.64386	6.64386	6.64386	6.64386	6.64386	6.64386	6.64386	6.64386	6.64386	6.64386	6.64386	6.64386	6.64386	6.64386	6.64386	6.64386	6.64386	6.64386	6.64386	6.64386
HG2724-HT2820_at	7.47573	6.64386	8.38802	6.64386	6.64386	6.64386	6.64386	6.64386	6.64386	7.49185	8.36632	8.7211	8.3966	6.64386	6.64386	6.64386	6.64386	6.64386	6.64386	6.64386	6.64386	11.1662	6.64386	9.39874	6.64386	6.64386	6.64386	6.64386	9.22882	8.79766	6.64386	6.64386	6.64386	6.64386	6.64386	7.56224	6.64386	6.64386	6.64386	6.64386	6.64386	6.64386	6.64386	9.40301	6.64386	6.64386	6.64386	6.64386	6.64386
HG2755-HT2862_at	6.64386	6.64386	6.64386	6.64386	6.64386	6.64386	6.64386	6.64386	6.64386	6.64386	6.64386	6.64386	6.64386	6.64386	6.64386	6.64386	6.64386	6.64386	6.64386	6.64386	6.64386	6.64386	6.64386	6.64386	6.64386	6.64386	6.64386	6.64386	6.64386	6.64386	6.64386	6.64386	6.64386	6.64386	6.64386	6.64386	6.64386	6.64386	6.64386	6.64386	6.64386	6.64386	6.64386	6.64386	6.64386	6.64386	6.64386	6.64386	6.64386
HG2788-HT2896_at	8.5812	11.2998	10.2726	10.3309	10.1712	10.9278	8.97154	10.314	8.57743	9.35094	8.80413	9.50779	10.4818	10.0417	10.7616	10.9737	11.2306	10.1137	10.1935	9.84862	13.8361	12.8317	11.6564	11.6742	11.2131	10.0265	11.3929	9.68124	11.1215	10.5536	11.3231	12.3851	11.102	12.6887	10.2467	11.2432	10.2912	10.2515	10.4409	9.88722	9.44501	9.35535	12.1802	9.63481	10.3987	10.7237	9.79279	11.4325	9.92035
HG2796-HT2904_at	7.35755	7.91289	6.64386	7.74147	6.75489	8.77479	6.87036	6.64386	7.40088	7.09803	6.96578	6.64386	6.64386	6.64386	6.64386	6.64386	6.64386	7.48382	8.66534	7.7879	6.64386	6.64386	6.64386	7.30378	8.8857	7.85175	8.53138	7.62936	6.64386	7.78136	7	6.64386	6.79442	6.64386	8.30378	6.64386	6.64386	8.29921	6.64386	8.12928	7.83289	6.72792	8.29462	7.45121	7.42626	6.78136	6.64386	6.64386	6.64386
HG2810-HT2921_at	6.94251	8.11894	7.82018	7.06609	6.64386	9.08746	8.56986	7.25739	7.77479	7.76818	6.64386	6.6865	7.05528	7.43463	9.22641	7.03342	6.64386	7.82655	8.0607	7.33985	8.73809	9.11894	8.46761	8.62936	7.65821	8.15987	8.224	7.02237	7.81378	7.82018	6.82018	7.6865	9.10329	8.78136	8.19476	7.67948	7.93664	8.89482	7.22882	7.5157	9.72451	7.55459	7.13955	7.45121	7.39232	6.64386	7.54689	7.49985	7.31288
HG2825-HT2949_at	6.64386	8.87344	6.64386	6.91886	9.06878	9.76984	7.42626	6.64386	8.74147	8.59246	7.72792	7.12928	6.64386	6.64386	7.32193	7.8009	6.64386	7.88874	7.94837	8.21432	6.64386	7.8009	8.01681	8.01123	9.35094	8.35755	9.14211	8.47168	8.37069	8.20945	6.64386	9.22641	8.42626	7.17991	8.5157	8.20945	6.64386	9.24317	8.72451	7.3837	9.24793	8.35755	6.91886	6.89482	6.64386	6.64386	7.91289	8.2384	8
HG2855-HT2995_at	9.44501	10.4409	10.1799	11.3032	12.245	10.9549	11.3449	11.0444	10.7151	11.7752	10.3923	10.6874	10.4179	10.0954	11.3026	11.6165	8.93369	10.8681	9.70736	9.2384	9.75822	9.02514	8.41363	8.61102	11.2282	9.5216	9.48583	10.4543	10.6777	9.73132	10.8626	9.86728	10.1137	8.88264	10.3565	10.7279	10.6653	11.3359	11.6488	9.77149	10.3531	9.50581	11.5536	11.6524	11.0821	9.20457	11.3482	10.7091	11.1351
HG2873-HT3017_at	13.9658	13.9658	13.9658	13.9658	13.9658	13.9658	13.9658	13.9658	13.9658	13.9658	13.9658	13.9658	13.9658	13.9658	13.9658	13.9658	13.9658	13.9437	13.9658	13.3714	13.9658	13.9658	13.9658	13.9658	13.9658	13.9658	13.9658	13.9658	13.9658	13.9658	13.9658	13.9658	13.9658	13.9658	13.9658	13.9658	13.9658	13.9658	13.9658	13.9658	13.9658	13.9658	13.9658	13.9658	13.9658	13.9658	13.9658	13.9658	13.9658
HG2874-HT3018_at	9.49985	8.01681	8.86728	8.08215	10.0566	8.32193	9.30378	9.3837	9.42206	8.38802	9.37504	7.67948	8.23362	9.01402	9.22882	9.66178	6.64386	9.03892	8.90989	9.77149	7.85798	9.43463	8.73471	9.11894	9.29692	8.18982	8.9571	8.05528	8.64386	8.73809	7.7879	9.23122	7.36632	7.89482	8.53528	9.51373	9.17243	9.04439	8.98014	9.02514	9.20212	9.07414	10.3663	9.7211	8.26679	7.99435	9.47776	9.19229	9.62388
HG2936-HT3080_at	8.5812	6.64386	7.88874	6.64386	6.64386	6.72792	6.64386	6.64386	6.79442	7.34873	6.64386	7.61471	7.53916	8.19476	6.64386	7.11894	6.64386	6.64386	7.05528	6.64386	6.64386	6.64386	6.64386	7.2854	6.64386	6.64386	7.17991	6.64386	6.64386	7	6.64386	6.64386	6.64386	6.64386	6.64386	6.64386	6.64386	6.64386	6.64386	6.64386	6.64386	7.53138	6.64386	6.64386	6.64386	6.64386	6.64386	6.64386	6.64386
HG2992-HT5186_at	6.64386	7.37504	7.91289	7.14975	7.96	9.19229	6.64386	7.50779	6.64386	6.64386	7.22882	7.12928	7.88264	7.89482	6.64386	7.29462	7.2384	6.64386	8.0607	7.06609	7.65821	9.5157	6.64386	7.91886	6.64386	7.92481	7.14975	7.76818	7.98299	6.64386	7.47573	6.64386	9.48784	6.64386	6.64386	9.50978	6.64386	6.64386	8.33539	7.78136	6.64386	6.64386	9.17991	7.8009	8.59991	6.64386	6.64386	8.16993	8.03342
HG3039-HT3200_at	10.7846	9.02791	10.9701	10.9099	10.3049	11.5722	10.7805	10.5594	10.2726	10.1124	10.7056	9.94837	11.1599	9.81218	10.9506	11.2342	9.90087	11.3912	11.0279	11.1972	11.5512	10.8431	10.6129	10.888	11.9396	10.5803	11.1978	10.7125	11.4929	10.6847	8.74819	11.2685	10.6502	10.5784	10.84	11.1886	11	11.1331	10.3465	10.2372	11.3399	10.4388	10.676	10.1935	9.71081	10.66	10.9586	9.65642	9.77479
HG3063-HT3224_at	6.64386	6.64386	6.64386	6.64386	6.64386	6.64386	6.64386	6.64386	6.64386	6.64386	6.64386	6.64386	6.64386	6.64386	6.64386	6.64386	6.64386	6.64386	6.64386	6.64386	6.64386	6.64386	6.64386	6.64386	6.64386	6.64386	6.64386	6.64386	6.64386	6.64386	6.64386	6.64386	6.64386	6.64386	6.64386	6.64386	6.64386	6.64386	6.64386	6.64386	6.64386	6.64386	6.64386	6.64386	6.64386	6.64386	6.64386	6.64386	6.64386
HG3088-HT3263_at	7.99435	7.06609	7.62205	6.64386	7.81378	7.98299	7.42626	7.45121	7.98299	8.39232	9.49785	8.20457	6.64386	6.94251	8.26209	8.72792	6.70044	6.64386	7.13955	7.59246	6.64386	7.40939	6.64386	6.64386	6.64386	6.64386	6.90689	6.64386	6.64386	6.64386	7.19967	6.64386	6.64386	6.64386	6.64386	8.56224	7.20945	6.78136	8.0607	6.64386	7.82018	7.8392	7.44294	6.64386	7.5157	6.87036	7.46761	7.18982	7.60733
HG3104-HT3280_at	6.64386	6.64386	6.64386	6.64386	6.64386	6.64386	6.64386	6.64386	6.64386	6.64386	6.64386	6.64386	6.64386	6.64386	6.64386	6.64386	6.64386	6.64386	6.64386	6.64386	6.64386	6.64386	6.64386	6.64386	6.64386	6.64386	6.64386	6.64386	6.64386	6.64386	6.64386	6.64386	6.64386	6.64386	6.64386	6.64386	6.64386	6.64386	6.64386	6.64386	6.64386	6.64386	6.64386	6.64386	6.64386	6.64386	6.64386	6.64386	6.64386
HG311-HT311_at	12.7777	12.515	12.8494	12.5601	13.3891	12.8343	12.8204	12.5142	12.8626	13.158	12.4996	12.7457	13.0688	13.0336	13.4468	13.4607	13.0218	12.3049	12.3318	12.3888	13.1018	13.0668	12.7568	13.3216	12.3864	12.478	11.7181	11.4424	12.3424	12.9685	13.1599	13.0062	12.3143	12.4179	12.884	13.6048	13.2213	12.9758	13.5639	12.4841	12.4126	12.1347	13.8371	12.8624	12.6099	12.9981	12.3545	13.1788	13.2951
HG3111-HT3287_at	6.64386	6.64386	6.64386	7.2384	6.64386	6.64386	6.64386	6.64386	6.64386	6.64386	6.64386	6.64386	6.64386	6.64386	6.64386	6.64386	6.64386	6.64386	6.64386	6.64386	6.64386	6.64386	6.64386	6.64386	6.64386	6.64386	6.64386	6.64386	6.64386	6.64386	6.64386	6.64386	6.64386	6.64386	6.64386	6.64386	6.64386	6.64386	6.64386	6.64386	6.64386	6.64386	6.64386	6.64386	6.64386	6.64386	6.64386	6.64386	6.64386
HG3117-HT3293_at	6.64386	6.64386	6.64386	6.64386	6.64386	6.64386	6.64386	6.64386	6.64386	6.64386	6.64386	6.64386	6.64386	6.64386	6.64386	6.64386	6.64386	6.64386	6.64386	6.64386	6.64386	6.64386	6.64386	6.71425	6.64386	6.64386	6.64386	6.64386	6.64386	6.64386	6.64386	6.64386	6.64386	6.64386	6.64386	6.64386	6.64386	6.64386	6.64386	6.64386	6.64386	6.64386	6.64386	6.64386	6.64386	6.64386	6.64386	6.64386	6.64386
HG3123-HT3299_at	6.64386	6.64386	7.03342	6.64386	6.64386	7.20945	6.94251	6.64386	6.64386	6.64386	6.64386	6.64386	6.64386	6.64386	6.64386	6.64386	6.64386	6.64386	6.64386	6.64386	6.64386	6.64386	6.64386	7.27612	6.64386	6.64386	6.64386	6.93074	6.64386	6.64386	6.64386	6.64386	6.64386	6.98868	6.64386	6.64386	7.71425	7.50779	6.64386	7.85175	7.84549	7.82655	7.48382	6.64386	6.64386	6.64386	7.15987	6.64386	6.64386
HG3132-HT3308_at	6.64386	6.64386	6.64386	6.64386	6.64386	6.64386	6.64386	6.64386	6.64386	6.64386	6.64386	6.64386	6.64386	6.64386	6.64386	6.65821	6.64386	6.64386	6.64386	6.64386	6.64386	6.64386	6.64386	6.64386	6.64386	6.64386	6.64386	6.64386	6.64386	6.64386	6.64386	6.64386	6.91886	6.64386	6.64386	6.64386	6.64386	6.64386	6.64386	6.64386	6.64386	6.64386	6.64386	6.64386	6.64386	6.64386	6.64386	6.64386	6.64386
HG3137-HT3313_at	6.64386	6.64386	6.64386	6.64386	6.64386	6.64386	6.64386	6.64386	6.64386	6.64386	6.64386	6.64386	6.64386	6.64386	6.64386	6.64386	6.64386	6.64386	6.64386	6.64386	6.64386	6.64386	6.64386	6.64386	6.64386	6.64386	6.64386	6.64386	6.64386	6.64386	6.64386	6.64386	6.64386	6.64386	6.64386	6.64386	6.64386	6.64386	6.64386	6.64386	6.64386	6.64386	6.64386	6.64386	6.64386	6.64386	6.64386	6.64386	6.64386
HG315-HT315_at	8.47978	8.25267	6.64386	7	7.98299	9.35535	6.84549	6.64386	6.75489	7.90087	6.64386	7.3837	6.71425	7.49985	6.64386	6.64386	7.41785	7.82655	8.67596	7.82018	7.18982	8.75489	7.82655	8.50779	8.08746	6.64386	8.50779	7.88874	8.45533	7.84549	6.87036	8.80735	9.45943	8.78136	8.71425	6.9542	7.94837	8.31741	6.83289	7.96578	8.91289	8.06609	8.40939	7.59246	7.56224	7.85798	6.64386	7.85798	7.03342
HG3162-HT3339_at	8.93664	9.84862	8.92184	9.33316	9.89633	10.0417	8.9542	6.64386	9.06609	9.59246	8.08215	9.31741	8.90087	8.81378	8.5812	9.74819	9.22641	9.18239	9.69523	9.32867	9.16993	10.0967	9.88722	9.77149	9.71596	8.86109	9.9542	9.34651	9.45533	9.71768	9.28309	10.0808	9.98157	10.2167	9.53333	8.9571	9.97298	9.72451	9.15735	9.81538	9.5157	9.90388	9.39232	9.54303	9.70217	9.78136	9.43254	9.73302	8.81698
HG3175-HT3352_at	8.23362	6.64386	6.64386	7.08746	8.65105	9.33985	8.03342	8.07146	6.64386	7.7211	6.64386	6.64386	8.50779	6.64386	8.49985	7.09803	6.64386	8.2854	8.49185	7.53138	8.26209	9.07682	8.45533	9.42626	8.86419	8.02791	8.69349	8.07146	8.72792	6.6865	6.64386	8.65105	9.45533	8.30834	8.43879	8.45533	8.42206	9.3443	7.67948	8.61102	9.0954	7.8009	8.25267	8.61471	6.64386	8.0607	7.70736	7.70044	6.64386
HG3214-HT3391_at	13.9658	13.9658	13.9658	13.9658	13.9658	13.9658	13.9658	13.9658	13.9658	13.9658	13.9658	13.9658	13.9658	13.9658	13.768	13.9658	13.9658	13.9658	13.9658	13.9658	13.9658	13.9658	13.9658	13.9658	13.9658	13.9658	13.9658	13.9658	13.9658	13.9658	13.9658	13.9658	13.9658	13.9658	13.9658	13.9658	13.9658	13.9658	13.9658	13.9658	13.9658	13.9658	13.9658	13.9658	13.9658	13.9658	13.9658	13.9658	13.9658
HG3227-HT3404_at	8.9629	6.64386	7.81378	8.3443	6.94251	10.0967	7.43463	6.64386	8.01681	7.04439	8.30378	7.14975	8.31288	7.82655	6.64386	8.73132	6.76818	8.41785	9.24079	6.64386	8.90388	6.70044	8.20457	8.96578	7.5157	7.86419	7.48382	6.64386	8.55842	8.32643	6.89482	7.98868	6.64386	6.64386	7.98868	8.03892	7.73471	8.47168	8.29002	7.45943	7.11894	8.8857	7.8009	7.35755	6.65821	8.81698	7.46761	6.64386	6.64386
HG3231-HT3408_at	7.91289	7.91289	6.64386	6.64386	6.64386	8.12412	6.64386	6.64386	6.94251	6.64386	6.75489	6.64386	7.70736	6.64386	6.64386	7.10852	6.64386	6.83289	8.29462	6.64386	6.64386	7.56986	7.32193	6.88264	7.89482	7.13955	7.11894	7.56986	7.60733	8.15482	6.64386	8.54689	7.70044	6.64386	8.32193	6.64386	8.3443	6.64386	6.64386	6.64386	7.83289	7.59991	7.94837	7.45121	6.64386	6.64386	6.64386	7.83289	6.64386
HG3248-HT3425_at	6.64386	6.98868	6.64386	6.64386	6.64386	6.64386	6.64386	6.64386	6.64386	6.64386	6.64386	6.64386	6.64386	6.64386	6.64386	6.64386	6.64386	6.64386	7.45121	7.67948	6.64386	7.12928	7.10852	7.79442	7.92481	6.64386	6.64386	6.64386	6.75489	6.64386	6.64386	6.64386	6.64386	6.64386	6.64386	6.64386	6.94251	7.05528	6.64386	6.64386	7.24793	7.40088	6.64386	6.64386	6.64386	6.64386	6.64386	6.64386	6.64386
HG3254-HT3431_at	8.31288	8.55842	7	8.03342	7.27612	8.07146	6.64386	7.16993	6.64386	7.39232	6.64386	6.75489	7.06609	7.53138	7.7211	7.97154	6.64386	7.50779	8.02237	7.06609	7.33092	8.34873	8.30834	9.01959	8.19476	7.49185	7.40939	8.41785	8.48784	7.88264	7.2854	8.42626	8.67596	7.80735	8.03892	7.71425	8.31288	7.52356	7.87036	6.90689	7.43463	7.85798	8.08215	7.47573	7.08746	7.02237	7.54689	7.62205	7.49185
HG3255-HT3432_at	8.47978	8.72792	8.21432	8	8.38802	9.19476	8.18982	8.03342	8.43045	8.15987	7.82018	8.26209	8.17991	8.69	8.26679	7.90087	7.87652	7.35755	7.94837	8.45121	8.7879	9.0607	8.59246	9.0954	7.37504	7.96	8.59246	8.49586	8.82972	8.7879	6.64386	9.04439	9.74651	8.95128	8.91886	8.59991	8.90989	9.61655	7.86419	8.78136	8.76487	9.24079	9.2503	8.37938	8.11894	8.67243	8.39232	8.50779	7.45121
HG3264-HT3441_at	6.64386	7.2854	6.64386	6.64386	6.64386	8.79442	6.64386	6.64386	8.11374	7.03342	6.64386	6.64386	6.64386	6.64386	6.64386	6.64386	6.64386	6.64386	6.64386	6.64386	6.64386	6.64386	6.64386	6.64386	6.64386	6.64386	6.64386	6.64386	6.64386	6.64386	6.64386	6.64386	6.64386	6.64386	6.88264	6.64386	6.64386	6.84549	6.64386	7.49985	7.16993	6.64386	6.64386	6.64386	6.64386	6.64386	6.64386	6.64386	6.64386
HG3286-HT3463_at	10.374	8.11894	7.7879	10.0042	8.75489	6.64386	8.66178	9.19476	8.66888	6.64386	8.90388	6.64386	9.02514	9.50978	6.64386	7.90087	8.87652	9.56605	9.41363	6.64386	6.64386	10.0348	9.12153	9.47776	10.3476	8.61102	9.44708	8.80735	8.05528	8.71425	8.26679	7.63662	9.67596	8.64386	6.64386	6.64386	6.64386	8.62205	6.64386	6.64386	6.64386	9.97154	9.45943	8.96578	6.64386	6.64386	9.00562	9.51373	6.64386
HG3288-HT3465_at	7.77479	7.49185	6.64386	6.82018	6.64386	7.90689	6.64386	6.64386	6.64386	6.64386	6.64386	6.64386	6.64386	6.65821	6.78136	7.29462	6.64386	6.93074	7.2384	6.65821	6.64386	7.07682	6.75489	6.64386	7.59991	6.64386	7.37504	6.64386	6.64386	6.64386	6.64386	7.88874	8.21917	7.04439	7.40939	6.64386	7.17991	7.65105	6.64386	6.64386	6.80735	7.8009	6.70044	6.64386	6.80735	6.64386	6.64386	7.2384	6.64386
HG3299-HT3476_at	6.64386	6.64386	6.64386	6.64386	6.64386	6.64386	6.64386	6.64386	6.64386	6.64386	6.64386	6.64386	6.64386	6.64386	6.64386	6.64386	6.64386	6.64386	6.64386	6.64386	6.64386	6.64386	6.64386	6.64386	6.64386	6.64386	6.64386	6.64386	6.64386	6.64386	6.64386	6.64386	6.64386	6.64386	6.64386	6.64386	6.64386	6.64386	6.64386	6.64386	6.64386	6.64386	6.64386	6.64386	6.64386	6.64386	6.64386	6.64386	6.64386
HG33-HT33_at	13.8593	13.9658	13.9658	13.6495	13.9658	13.6948	13.8565	13.6568	13.7182	13.9658	13.9658	13.9136	13.806	13.9658	13.9658	13.9658	13.3025	13.9658	13.7976	13.6745	13.8424	13.9658	13.9658	13.7339	13.9658	13.9658	13.1352	12.6078	13.7885	13.3989	13.2899	13.9658	13.8718	13.5244	13.644	13.9302	13.6259	13.7539	13.9658	12.9889	13.9658	13.6036	13.9658	13.8056	13.9468	13.9658	13.9658	13.918	13.9598
HG331-HT331_at	6.64386	6.64386	6.64386	6.64386	6.64386	6.64386	6.64386	6.64386	6.64386	6.64386	6.64386	6.64386	6.64386	6.64386	6.64386	6.64386	6.64386	6.64386	6.64386	6.64386	6.64386	6.64386	6.64386	6.64386	6.64386	6.64386	6.64386	6.64386	6.64386	6.64386	6.64386	6.64386	6.64386	6.64386	6.64386	6.64386	6.64386	6.64386	6.64386	6.64386	6.64386	6.64386	6.64386	6.64386	6.64386	6.64386	6.64386	6.64386	6.64386
HG3313-HT3490_at	6.64386	6.64386	6.64386	6.64386	6.64386	6.64386	6.64386	6.64386	6.64386	6.64386	6.64386	6.64386	6.64386	6.64386	6.64386	6.64386	6.64386	6.64386	6.64386	6.64386	6.64386	6.64386	6.64386	6.64386	6.64386	6.64386	6.64386	6.64386	6.64386	6.64386	6.64386	6.64386	6.64386	6.64386	6.64386	6.64386	6.64386	6.64386	6.64386	6.64386	6.64386	6.64386	6.64386	6.64386	6.64386	6.64386	6.64386	6.64386	6.64386
HG3344-HT3521_at	6.64386	8.34873	8.25739	6.64386	7.87036	8.99718	7.05528	8.73132	6.64386	9.07682	6.89482	6.64386	6.64386	7.56224	8.3837	8.32193	6.96578	6.64386	8.25739	6.64386	6.64386	6.64386	7.91289	6.64386	8.21432	6.64386	7.17991	6.64386	8.14466	6.71425	6.72792	8.14975	7.18982	8.37069	8.57365	8.65821	7.89482	8.77808	8.27146	8.19476	8.48784	6.72792	8.47168	6.64386	6.64386	7.49985	8.49185	8.45533	6.64386
HG3345-HT3522_at	6.64386	6.64386	6.64386	6.64386	6.64386	6.64386	6.64386	6.64386	6.64386	6.64386	6.64386	6.64386	6.64386	6.64386	6.64386	6.64386	6.64386	6.64386	6.64386	6.64386	6.64386	6.64386	6.64386	6.64386	6.64386	6.64386	6.64386	6.64386	6.64386	6.64386	6.64386	6.64386	6.64386	6.64386	6.64386	6.64386	6.64386	6.64386	6.64386	6.64386	6.64386	6.64386	6.64386	6.64386	6.64386	6.64386	6.64386	6.64386	6.64386
HG3355-HT3532_at	11.3454	10.4231	10.1712	10.1611	11.0028	12.0182	9.60363	9.22882	10.2644	9.61287	10.2842	9.64205	10.792	11.0077	8.90388	9.75656	10.2479	10.5934	11.1491	10.8811	10.2923	10.8431	10.7912	11.1824	10.1241	10.1812	11.2497	8.85798	11.4635	10.2336	8.82018	10.6064	11.6698	11.2046	11.1718	10.5584	11.2808	11.2784	9.75489	10.3783	11.265	11.0231	10.6147	10.3805	9.72622	9.5157	10.374	10.2866	9.33539
HG3364-HT3541_at	13.9658	13.9658	13.9658	13.9658	13.9658	13.9658	13.9658	13.9658	13.9658	13.9658	13.9658	13.9658	13.9658	13.9658	13.9658	13.9658	13.9658	13.9658	13.9658	13.9658	13.9658	13.9658	13.9658	13.9658	13.9658	13.9658	13.9658	13.9658	13.9658	13.9658	13.9658	13.9658	13.9658	13.9658	13.9658	13.9658	13.9658	13.9658	13.9658	13.9658	13.9658	13.6672	13.9658	13.9658	13.9658	13.9658	13.9658	13.9658	13.9658
HG3369-HT3546_at	6.64386	6.64386	6.64386	6.64386	6.64386	6.64386	6.64386	6.64386	6.64386	6.64386	6.64386	6.64386	6.64386	6.64386	6.91886	6.64386	6.64386	6.64386	6.64386	6.64386	6.64386	6.64386	6.64386	6.64386	6.64386	6.64386	6.64386	6.64386	6.64386	6.64386	6.64386	6.64386	6.64386	6.64386	6.64386	6.64386	6.64386	6.64386	6.64386	6.64386	6.64386	6.64386	6.64386	6.64386	6.64386	6.64386	6.64386	6.64386	6.64386
HG3400-HT3579_at	6.64386	6.64386	6.64386	6.64386	6.64386	6.64386	6.64386	6.64386	6.64386	6.64386	6.64386	6.64386	6.64386	6.64386	6.64386	6.64386	6.64386	6.64386	6.64386	6.64386	6.64386	6.64386	6.64386	6.64386	6.64386	6.64386	6.64386	6.64386	6.64386	6.64386	6.64386	6.64386	6.64386	6.64386	6.64386	6.64386	6.64386	6.64386	6.64386	6.64386	6.64386	6.64386	6.64386	6.64386	6.64386	6.64386	6.64386	6.64386	6.64386
HG3405-HT3586_at	6.64386	7.52356	7.5157	6.64386	6.64386	7.14975	6.64386	6.64386	6.64386	6.64386	6.85798	6.64386	7	6.91886	6.64386	6.78136	6.64386	6.64386	6.64386	6.64386	6.64386	7.6865	6.64386	6.64386	7.01123	6.64386	7.14975	6.64386	6.78136	6.64386	6.64386	6.64386	6.64386	6.64386	6.78136	6.64386	6.64386	6.64386	6.64386	6.64386	6.64386	6.64386	6.64386	6.64386	6.64386	6.64386	6.64386	6.64386	6.64386
HG3415-HT3598_at	6.64386	6.64386	6.64386	7.14975	6.64386	6.64386	6.64386	8.14466	6.64386	8.20945	6.76818	7.93074	6.80735	7.01123	7.01123	8.03342	6.64386	7.44294	8.08746	7.97154	7.22882	7.09803	7.35755	6.64386	6.64386	7.44294	6.64386	6.64386	6.64386	6.64386	6.64386	6.64386	6.64386	6.64386	7.07682	6.78136	7.29462	7.97154	6.64386	8.11374	7.66534	6.64386	7.90087	6.65821	7.47573	6.64386	6.64386	7.08746	6.64386
HG3432-HT3618_at	7.26679	6.64386	6.64386	8.633	7.69349	6.82018	7.43463	6.64386	7.91289	6.64386	7	6.64386	6.64386	8.02791	6.64386	7.83289	7.02237	6.64386	6.64386	8.32193	7.29462	9.20457	7.10852	6.64386	6.64386	6.64386	6.64386	7.76155	6.64386	6.64386	6.64386	7.7879	6.64386	7.63662	7.13955	7.08746	8.04985	6.64386	7.58496	6.64386	6.64386	6.64386	8.74147	7.29462	6.64386	6.64386	8.14466	6.64386	6.64386
HG3432-HT3621_at	7.60733	7.03342	6.64386	6.64386	6.98868	8.69697	6.64386	6.64386	6.64386	6.64386	6.64386	6.64386	6.64386	6.84549	7.2384	6.64386	6.64386	6.64386	7.29462	6.64386	6.64386	6.64386	6.64386	6.64386	6.97728	7.45943	7.64386	6.64386	7.70044	6.64386	6.64386	6.64386	6.64386	6.64386	6.64386	6.64386	7.10852	6.64386	6.64386	6.64386	6.64386	7.15987	7.20945	6.64386	6.9542	6.64386	6.9542	6.64386	6.64386
HG3454-HT3647_at	9.40939	9.51964	8.24793	8.43463	9.10852	9.78136	7.20945	7.46761	7.08746	7.05528	7.40939	8.05528	8.43045	8.25739	7.03342	8.57365	8.18488	8.62936	9	8.26209	8.00562	9.43045	9.01681	8.8009	9.33316	8.25739	9.39446	7.35755	9.42417	8.40088	7.26679	8.93664	9.80413	8.52356	8.61839	8.69	8.94544	8.69349	8.18488	8.61471	9.47573	8.8857	8.30834	9.17243	8.12412	8.24317	8.45121	9.21432	8.11894
HG3477-HT3670_at	6.64386	6.64386	6.64386	6.64386	6.64386	6.64386	6.64386	6.64386	6.64386	6.64386	6.64386	6.64386	6.64386	6.64386	6.64386	6.64386	6.64386	6.64386	6.64386	6.64386	6.64386	6.64386	6.64386	6.64386	6.64386	6.64386	6.64386	6.64386	6.64386	6.64386	6.64386	6.64386	6.64386	6.64386	6.64386	6.64386	6.64386	6.64386	6.64386	6.64386	6.64386	6.64386	6.64386	6.64386	6.64386	6.64386	6.64386	6.64386	6.64386
HG3492-HT3686_at	10.9381	10.8313	9.89633	10.7591	10.8556	12.388	9.94544	10.363	9.15482	9.85331	9.96578	9.94105	10.3083	10.7871	9.46148	10.1434	10.0808	10.5603	11.357	10.2935	10.4367	11.3365	10.1874	10.6064	10.7822	10.4168	11.6952	10.7381	11.6175	10.7723	9.88722	11.3197	11.6852	10.8611	11.2491	10.8502	11.4067	11.0775	10.0566	10.6046	11.0661	10.858	10.9549	10.7415	10.8895	10.4898	10.8114	10.7895	10.0674
HG3494-HT3688_at	6.64386	6.64386	7.81378	8.15482	6.74147	6.91886	6.64386	7.56224	8.14466	8.45943	6.64386	7.25739	8.53528	8.47168	6.64386	8.34873	10.8146	7.31288	6.64386	6.64386	12.0788	10.1923	9.18239	10.4574	10.1331	9.2503	9.86573	8.84235	8.66178	8.75154	7.49185	12.1016	8.20457	10.8376	7.8009	10.0688	7.20945	6.64386	8.46352	8.71768	6.67243	6.64386	8.08746	8.51964	6.64386	8.73471	7.78136	7.73471	7.02237
HG3495-HT3689_at	8.17493	6.64386	6.64386	6.79442	7.71425	7.13955	6.64386	6.64386	6.64386	6.64386	6.64386	6.64386	6.64386	7.01123	6.64386	6.64386	7.12928	6.64386	7.59246	6.64386	6.64386	7.39232	6.64386	6.64386	6.64386	6.64386	8.04985	6.64386	8.13443	6.64386	6.64386	6.64386	7.62205	6.64386	6.64386	6.64386	6.75489	6.64386	6.64386	6.64386	6.64386	6.64386	6.64386	6.64386	6.64386	6.64386	6.64386	6.64386	6.64386
HG3502-HT3696_at	6.64386	6.64386	6.64386	6.64386	6.64386	6.64386	6.64386	6.64386	6.64386	6.64386	6.64386	6.64386	6.64386	6.64386	6.64386	6.64386	6.64386	6.64386	6.64386	6.64386	6.64386	6.64386	6.64386	6.64386	6.64386	6.64386	7.29462	6.97728	6.64386	6.64386	6.64386	6.64386	8.53528	7.59991	6.64386	6.64386	7.98299	6.64386	6.64386	6.64386	6.78136	6.64386	6.64386	6.64386	6.64386	6.64386	6.64386	6.64386	6.64386
HG3510-HT3704_at	6.64386	6.64386	6.64386	6.64386	6.64386	7.62936	6.64386	6.64386	6.64386	6.64386	6.64386	6.64386	6.64386	7.03342	7.33985	6.64386	6.64386	6.64386	6.64386	6.64386	6.64386	6.64386	6.64386	7.30378	6.85798	6.64386	8.11894	6.64386	7.74147	6.64386	6.64386	6.64386	6.64386	6.64386	6.64386	6.64386	6.64386	6.64386	6.64386	6.64386	6.64386	6.88264	7.11894	6.64386	6.64386	6.64386	6.64386	6.64386	6.64386
HG3514-HT3708_at	11.9296	11.5589	12.7887	12.1399	12.6733	11.9118	11.6165	11.3123	11.8773	11.5622	11.4383	11.357	12.1085	12.6332	12.8378	12.7924	13.2611	10.9527	11.0701	11.0161	11.849	12.6015	12.0206	12.3236	12.2787	11.2306	11.8757	11.5309	12.4876	12.0984	11.7727	12.5873	12.4268	12.5634	12.0637	12.9352	12.4184	12.0447	12.4126	11.5265	11.3767	11.3636	13.056	12.1472	12.512	11.7768	12.4168	12.3531	12.0681
HG3517-HT3711_at	6.64386	6.80735	6.64386	6.64386	6.64386	7.27612	6.65821	7.93664	6.64386	6.64386	7.37504	7.26679	6.64386	6.64386	6.64386	6.64386	6.64386	6.64386	8.11894	6.70044	6.64386	7.81378	6.64386	7.29462	7.40088	6.89482	7.53138	6.64386	6.64386	6.64386	6.64386	7.59991	8.08215	7.65105	6.64386	6.64386	7.64386	7.40939	6.64386	7.36632	7.39232	7.93074	7.05528	6.64386	6.64386	6.64386	6.64386	6.64386	6.64386
HG3521-HT3715_at	9.16993	9.35535	8.99718	10.7151	9.84706	8.85175	8.57365	10.1497	9.71939	9.24317	8.67948	9.40088	9.54303	10.1886	10.5411	11.1072	10.927	8.40514	9.45121	7.55459	8.76155	10.5498	10.2503	10.6996	9.8392	8.76155	9.87958	8.05528	9.02237	8.48784	8.79766	10.1189	9.41996	9.37069	9.69697	10.3465	11.0348	10.021	10.6502	9.70044	8.93074	10.4909	11.1941	10.0444	10.1984	8.90388	9.69174	10.3197	10.115
HG3548-HT3749_at	9.33092	8.3443	7.53138	8.92778	6.83289	6.85798	7.06609	8.2384	8.92481	6.91886	7.29462	7.75489	8.07146	7.07682	6.64386	7.78136	8.35755	6.87036	6.64386	6.64386	7.36632	7.33092	6.64386	6.64386	8.28077	8.44708	7.79442	6.64386	6.64386	6.64386	7.40088	6.64386	8.00562	8.72451	6.64386	7.69349	6.64386	7.26679	7.97728	8.3837	6.64386	6.64386	9.94837	7.90087	7.19967	6.98868	6.64386	6.64386	8.40088
HG3549-HT3751_at	13.9658	13.9658	13.9658	13.9658	13.9658	13.9658	13.9658	13.9658	13.9658	13.9658	13.9658	13.9658	13.9658	13.9658	13.9658	13.9658	13.9658	13.9658	13.9658	13.9658	13.9658	13.9658	13.9658	13.9658	13.9658	13.9658	13.9457	13.8314	13.905	13.9658	13.9658	13.9658	13.8155	13.9658	13.9658	13.9658	13.9658	13.9658	13.9658	13.9658	13.9658	13.9658	13.9658	13.9658	13.9658	13.9658	13.9658	13.9658	13.9658
HG3566-HT3769_at	11.6551	11.3565	10.2444	10.446	11.0573	11.7326	9.99859	9.91139	9.78463	10.9506	9.56796	9.72622	10.7674	11.1072	10.3805	10.8887	10.8525	10.733	11.0168	9.56986	10.7322	11.3805	11.4341	11.0795	10.3641	10.0782	10.5641	10.1611	11.3253	11.6055	9.2384	11.2216	12.0272	10.8788	11.3658	10.0782	11.7616	11.7372	10.4543	10.7381	11.4325	10.8424	11.1787	10.4615	10.0941	10.3663	10.8811	9.91737	10.5245
HG3570-HT3773_at	6.64386	6.64386	6.64386	6.64386	6.64386	9.50581	8.37069	8.34873	6.64386	6.64386	6.64386	6.64386	6.64386	6.64386	6.64386	6.64386	6.64386	6.64386	6.64386	6.64386	6.64386	6.64386	6.64386	8.40088	6.64386	6.64386	7.71425	6.64386	6.64386	6.64386	8.66534	6.64386	6.64386	6.64386	6.64386	8.67948	6.64386	6.64386	6.64386	6.64386	6.64386	6.64386	8.04985	6.64386	6.64386	6.64386	6.64386	6.64386	6.64386
HG3578-HT3781_at	9.45943	9.5157	8.94837	7.88874	9.24079	10.0014	8.80413	7.88874	7.09803	6.64386	8.71768	8.08746	8.91289	8.99435	9.04439	8.12928	8.62936	8.67596	8.0607	8.89178	8.81698	8.86728	10.2432	8.66178	8.73132	8.47978	7.67243	8.14466	9.68475	7.83289	7.40088	9.75489	10.2228	9.71425	8.90388	9.35315	8.9542	10.1523	7.96	9.62022	9.27612	9.29692	8.9629	9.34207	8.37938	9.13186	8.84235	9.67948	9.72451
HG358-HT358_at	8.81057	9.23601	9.79116	8.29002	8.92481	10.0471	8.14975	9.50184	8.14975	8.60363	8.37504	8.22882	8.46761	8.65105	9.66711	9.17991	8.51175	8.71768	9.3966	8.96	9.18239	9.56986	9.66888	9.87036	8.75154	8.27612	9.17493	7.54689	9.46352	8.55075	8.04985	9.51373	10.3685	9.45327	9.28077	9.24317	9.54496	9.17991	8.0607	9.2503	9.75989	9.74315	9.31288	8.45121	8.5812	8.19967	8.49185	8.98014	8.25739
HG3627-HT3836_at	8.6865	7.73471	6.64386	7.04439	7.54689	7.55459	7.33092	6.64386	8.76487	7.91289	8.64024	7.53138	7.59991	8.07146	7.34873	7.2384	6.64386	6.64386	7.2384	8.55459	6.90689	6.64386	8.32643	7.94837	7.74819	7.2384	6.64386	8	8.13443	7.71425	6.64386	8.77149	9.47573	8.69349	8.50383	7.8392	9.16491	8.74483	6.64386	8.91588	8.224	7.64386	9.13186	6.64386	8.61102	7.88874	7.15987	7.74819	6.71425
HG363-HT363_at	9.47573	9.25503	9.51964	8.39232	9.10852	10.0875	6.64386	8.15987	6.64386	6.64386	6.64386	6.64386	8.77479	8.45533	7.91289	9.17243	7.94837	8.31741	9.08481	7.93074	8.65821	10.1984	9.80252	10.0661	9.0607	8.83605	9.88874	8.2854	8.82972	9.09803	6.64386	10.3554	10.1861	9.89785	9.7364	8.56986	10.7731	9.36851	9.15228	9.71253	9.00562	9.62022	9.24555	6.88264	8.86728	8.94837	7.43463	9.69349	7.6865
HG37-HT37_at	6.64386	6.96578	6.64386	6.64386	6.82018	6.64386	6.64386	6.64386	6.64386	6.64386	6.64386	6.64386	6.64386	6.64386	7.5157	7.25739	8.31288	6.64386	6.64386	7.09803	6.64386	8.13955	7.49985	8.47573	7.49185	6.64386	6.64386	7.53138	6.64386	7.01123	6.64386	7.05528	7.02237	6.64386	7.48382	7.56224	8.15987	7.74819	7.97728	7.64386	6.67243	6.64386	7.12928	7.20945	8.20457	6.64386	7.10852	7.60733	7.69349
HG3733-HT4003_at	6.64386	6.64386	6.64386	6.64386	6.64386	6.64386	6.64386	6.64386	6.64386	6.64386	6.64386	6.64386	6.64386	6.64386	6.64386	6.64386	6.64386	6.64386	6.64386	6.64386	6.64386	6.64386	6.64386	6.64386	6.64386	6.64386	6.64386	6.64386	6.64386	6.64386	6.64386	6.64386	6.64386	6.64386	6.64386	6.64386	6.64386	6.64386	6.64386	6.64386	6.64386	6.64386	6.64386	6.64386	6.64386	6.64386	6.64386	6.64386	6.64386
HG3740-HT4010_at	9.13443	7.67243	8.00562	7.33092	6.64386	9.68124	6.64386	7.81378	6.75489	6.97728	7.87652	6.64386	7.33985	6.64386	8.224	8.47168	7.64386	8.48784	8.90087	8.64024	7.74147	8.92778	8.87036	9.24555	7.62205	7.72792	8.82655	8.56986	9.61471	6.64386	6.64386	7.58496	9.69	9.06878	8.81057	9.21432	9.5216	9.46557	8.27146	9.23362	8.88264	8.76155	8.66888	6.88264	7.7879	6.96578	6.65821	9.08215	7.90087
HG3748-HT4018_at	6.64386	8.03892	6.64386	6.64386	9.40301	6.64386	7.81378	6.64386	6.64386	7	6.64386	6.64386	6.64386	6.64386	7.93664	8.55459	6.64386	6.64386	6.64386	6.64386	6.64386	7.05528	6.64386	6.64386	8.79766	6.64386	6.64386	7.96	6.64386	6.64386	6.64386	6.64386	9.21917	8.08215	6.64386	7.02237	7.87036	8.2384	9.04166	8.07682	7.06609	6.64386	7.32193	7.50779	6.64386	6.64386	7.60733	9.09803	8.32193
HG3790-HT4060_at	6.64386	6.64386	6.64386	6.64386	6.64386	6.64386	6.64386	6.64386	6.64386	6.64386	6.64386	6.64386	6.64386	6.64386	6.64386	6.64386	6.64386	6.64386	6.64386	6.64386	6.64386	6.64386	6.64386	6.64386	6.64386	6.64386	6.64386	6.64386	6.64386	6.64386	6.64386	6.64386	6.64386	6.64386	6.64386	6.64386	6.64386	6.64386	6.64386	6.64386	6.64386	6.64386	6.64386	6.64386	6.64386	6.64386	6.64386	6.64386	6.64386
HG384-HT384_at	12.5233	13.5048	12.8727	13.3231	13.5352	13.1178	13.032	12.4551	12.5687	13.007	13.3676	13.3807	13.1176	12.2633	11.6216	13.3113	12.9816	12.6103	12.7009	12.6271	13.5808	13.4358	12.8995	13.3449	12.782	12.6513	12.2915	13.0663	12.6481	12.9979	13.2287	12.64	13.4359	12.7738	13.1469	13.2992	13.0705	13.376	13.2896	12.8872	12.9571	11.5765	13.2985	12.9504	13.3931	12.9789	13.2143	13.4002	12.535
HG3872-HT4142_at	6.64386	6.64386	6.64386	6.64386	6.64386	6.64386	6.64386	6.64386	6.64386	6.64386	6.64386	7.67243	6.64386	6.64386	6.64386	6.64386	6.64386	6.64386	6.64386	6.64386	6.64386	6.64386	6.64386	6.64386	6.64386	6.64386	6.64386	6.64386	6.64386	6.64386	6.64386	6.64386	6.64386	6.64386	6.64386	6.64386	6.64386	6.64386	6.64386	6.64386	6.64386	6.64386	6.64386	6.64386	6.64386	6.64386	6.64386	6.64386	6.64386
HG3884-HT4154_at	6.64386	6.64386	7.45121	6.64386	8.49985	6.64386	6.64386	6.64386	6.64386	9.26444	6.64386	6.64386	6.64386	6.64386	8.48382	8.56224	6.64386	6.64386	7.11894	6.64386	9.07948	6.64386	6.64386	6.90689	6.64386	6.64386	6.64386	6.64386	7.40088	6.64386	6.64386	6.64386	6.64386	8.18488	6.64386	7.52356	6.64386	6.64386	6.64386	6.64386	6.64386	6.64386	7.53916	6.64386	7.82655	6.64386	6.64386	6.64386	6.64386
HG3893-HT4163_at	6.64386	6.83289	6.64386	6.64386	6.64386	6.75489	6.64386	6.64386	6.64386	6.64386	6.64386	6.64386	6.64386	6.64386	6.64386	6.64386	6.64386	6.64386	7.21917	6.64386	6.67243	6.64386	7.10852	6.64386	6.64386	6.64386	6.79442	6.64386	6.70044	6.71425	6.64386	8.13955	6.64386	7.63662	6.64386	6.76818	6.64386	6.64386	6.64386	6.64386	6.64386	8.11374	6.64386	7.59991	6.64386	6.76818	6.64386	7.06609	6.64386
HG3897-HT4167_at	6.64386	6.64386	6.94251	6.64386	6.64386	6.64386	6.64386	8.03342	6.64386	6.64386	6.64386	6.64386	6.64386	6.87036	6.64386	6.64386	6.64386	6.64386	6.64386	6.64386	6.64386	6.64386	6.64386	6.64386	6.64386	6.64386	6.87036	6.64386	6.64386	6.64386	6.64386	6.64386	6.64386	6.64386	7.18982	6.64386	6.64386	6.64386	6.64386	6.64386	6.64386	6.98868	6.64386	6.80735	6.64386	6.64386	6.64386	6.64386	6.64386
HG3930-HT4200_at	6.64386	6.64386	6.64386	6.64386	6.64386	6.64386	6.64386	7.65105	6.64386	6.64386	6.64386	6.64386	6.64386	6.64386	6.64386	6.64386	6.64386	6.64386	6.64386	6.64386	6.64386	7.32193	6.64386	6.84549	6.64386	6.64386	6.64386	6.64386	6.64386	8.90989	6.64386	7.21917	7.43463	6.64386	7.36632	6.94251	7.05528	6.64386	6.64386	6.64386	6.64386	6.64386	7.96578	6.64386	6.64386	6.64386	6.64386	6.64386	6.64386
HG3934-HT4204_at	8.24793	6.64386	8.19967	8.62571	9.52943	7.88264	8.27146	8.47168	8.90087	9.10066	7.77479	8.33985	9.07146	8.86728	8.9629	7.74147	8.87652	7.88874	7.8392	8.47168	9.05257	7.31288	9.3015	9.0607	6.64386	6.64386	9.72451	7.67243	8.11374	9.5411	8.08215	7.14975	6.64386	7.82655	6.64386	8.82655	6.93074	9.18488	6.64386	9.11374	7.26679	8.78136	8.56605	8.96867	6.64386	8.45121	8.35315	7.89482	8.38802
HG3936-HT4206_at	9.59619	8.12412	8.12928	8.74147	8.46352	8.99435	6.79442	8.00562	6.64386	6.64386	6.75489	6.83289	7.2854	7.70736	6.64386	8.50383	8.49586	6.64386	7.21917	6.64386	6.97728	9.09011	8.17493	6.64386	6.90689	7.67243	9.06878	6.64386	6.70044	7.24793	7.84549	8.59619	9.23122	8.86728	8.10852	7.82018	9.5216	8.02237	8.64746	7.62205	6.64386	8.13443	7.91289	7.86419	8.27612	7.7211	7.47573	7.97154	8.50779
HG3942-HT4212_at	6.64386	6.64386	6.64386	6.64386	6.64386	6.64386	6.64386	6.64386	6.64386	6.64386	6.64386	6.64386	6.64386	6.64386	6.64386	6.64386	6.64386	6.64386	6.64386	6.64386	6.64386	6.64386	6.64386	6.64386	6.64386	6.64386	6.64386	6.64386	6.64386	6.64386	6.64386	6.64386	6.64386	6.64386	6.64386	6.64386	6.64386	6.64386	6.64386	6.64386	6.64386	6.64386	6.64386	6.64386	6.64386	6.64386	6.64386	6.64386	6.64386
HG3945-HT4215_at	6.64386	6.64386	6.64386	6.64386	6.64386	6.64386	6.64386	6.64386	6.64386	6.64386	6.64386	6.64386	6.64386	6.64386	6.64386	6.64386	6.64386	6.64386	6.64386	6.64386	6.64386	6.64386	6.90689	6.64386	7.27612	6.64386	6.64386	7.25739	7.53916	6.64386	6.64386	6.64386	6.64386	6.64386	6.64386	6.64386	6.64386	6.64386	6.64386	6.64386	6.64386	6.64386	6.64386	6.64386	6.64386	6.64386	6.64386	6.64386	6.64386
HG3962-HT4232_at	6.64386	6.64386	6.64386	6.64386	6.64386	6.64386	6.64386	6.64386	6.64386	6.64386	6.64386	6.64386	6.64386	6.64386	6.64386	6.64386	6.64386	6.64386	6.64386	6.64386	6.64386	6.64386	6.64386	6.64386	6.64386	6.64386	6.64386	6.64386	6.64386	6.64386	6.64386	6.64386	6.64386	6.64386	6.64386	6.64386	6.64386	6.64386	6.64386	6.64386	6.64386	6.64386	6.64386	6.64386	6.64386	6.64386	6.64386	6.64386	6.64386
HG3971-HT4241_at	7.5157	7.7879	6.64386	8.10329	7.98299	8.16491	6.64386	7.63662	7.69349	9.19229	6.96578	6.64386	7.97154	7.77479	6.64386	6.64386	6.64386	6.89482	7.80735	6.64386	7.67243	8.43879	7.97154	8.2854	6.88264	6.80735	7.77479	7.71425	8.42626	7.77479	7.08746	6.94251	8.7039	8.52356	8.72792	7.55459	8.96867	7.76155	7.22882	8.06609	8.37069	8.29462	8.48382	7.7879	6.97728	7.8392	7.30378	8	7.15987
HG3976-HT4246_at	6.64386	6.67243	6.64386	6.64386	7.15987	6.82018	6.64386	6.64386	6.64386	8.99435	6.64386	6.64386	6.97728	6.83289	6.64386	6.64386	6.87036	6.64386	6.64386	6.79442	6.64386	7.04439	7.18982	7.71425	6.64386	6.64386	7.14975	6.64386	6.64386	6.64386	6.64386	6.6865	7.04439	7.06609	7.3837	6.64386	6.64386	7.73471	6.64386	6.64386	7.43463	7.74147	7.16993	6.64386	6.64386	6.64386	6.64386	7.15987	7.18982
HG3985-HT4255_at	8.24793	6.64386	6.64386	6.64386	6.64386	6.64386	6.64386	6.64386	6.64386	6.64386	6.64386	6.64386	6.64386	6.64386	6.64386	6.64386	6.64386	6.64386	6.64386	6.64386	6.64386	6.64386	6.64386	6.64386	6.64386	6.64386	6.64386	6.64386	6.64386	6.64386	6.64386	6.64386	7.97728	6.75489	6.64386	6.64386	6.64386	6.64386	6.64386	6.64386	6.64386	6.64386	6.64386	6.64386	6.64386	6.64386	6.64386	6.64386	6.64386
HG3987-HT4257_at	6.64386	6.64386	8.69349	9.56605	8.44294	10.2715	7.03342	6.9542	8.03892	8.633	6.64386	6.64386	6.64386	6.64386	9.28309	7.52356	6.64386	9.60918	9.65821	8.89178	6.64386	6.64386	6.64386	6.90689	6.64386	9.09803	6.64386	7.45943	10.7465	6.64386	7.62205	6.64386	6.64386	6.64386	6.64386	6.64386	6.64386	6.64386	6.64386	6.64386	6.64386	8.56986	9.40939	7.16993	7.12928	6.64386	8.46761	6.64386	8.89785
HG3989-HT4259_at	6.98868	6.64386	6.64386	6.64386	6.64386	6.71425	6.64386	6.64386	6.64386	6.80735	6.64386	6.64386	6.64386	6.64386	6.64386	6.64386	6.64386	6.64386	7.42626	6.64386	6.64386	6.75489	6.64386	7.25739	6.64386	6.75489	6.64386	6.64386	6.64386	6.64386	6.64386	6.64386	6.64386	6.64386	7.49985	6.64386	6.64386	6.64386	6.64386	6.64386	6.64386	6.64386	6.64386	6.65821	6.64386	6.64386	6.64386	6.64386	6.64386
HG3992-HT4262_at	6.64386	6.64386	8.04439	6.64386	6.64386	6.64386	6.64386	7.04439	6.64386	7.89482	7.85798	6.80735	6.64386	6.64386	8.66534	6.70044	6.64386	6.89482	6.64386	6.64386	7.61471	6.64386	8.77479	9.16993	6.64386	6.64386	6.64386	6.64386	6.64386	6.64386	6.64386	6.64386	6.64386	6.64386	7.25739	6.64386	6.64386	8.69	7.20945	7.26679	6.64386	8.41363	6.64386	6.64386	7.59991	7.76818	6.64386	6.80735	8.03892
HG3993-HT4263_at	6.64386	6.64386	6.64386	6.64386	6.64386	6.64386	6.64386	6.64386	6.64386	6.64386	6.64386	6.64386	6.64386	6.64386	6.64386	6.64386	6.64386	6.64386	6.64386	6.64386	6.64386	6.64386	6.64386	6.64386	6.64386	6.64386	6.64386	6.64386	6.64386	6.64386	6.64386	6.64386	6.64386	6.64386	6.64386	6.64386	6.64386	6.64386	6.64386	6.64386	6.64386	6.64386	6.64386	6.64386	6.64386	6.64386	6.64386	6.64386	6.64386
HG3994-HT4264_at	9.27612	9.56033	9.06878	9.19476	9.31967	9.71253	7.91886	8.75489	8.60363	8.7211	7.91289	8.86728	8.9542	8.98584	8.97154	9.45327	8.57743	8.90388	9.07682	7.73471	8.01123	9.44708	9.1472	9.51964	9.2503	8.37504	9.59805	8.11374	9.25503	8.41363	7.67243	9.32867	9.55651	8.81698	9.91737	8.53916	9.56033	9.99859	8.64386	8.29462	9.9629	8.8857	8.99435	9	8.53916	8.24317	8.89178	8.35755	8.49586
HG3995-HT4265_at	10.1254	9.91289	8.48784	9.96867	9.70908	6.76818	9.26679	8.10852	10.014	9.77314	9.69349	9.50779	9.81698	8.20457	9.49185	9.67066	9.46148	9.53333	10.1749	9.94544	10.3674	8.97441	10.0901	6.64386	10.403	9.06609	10.1228	10.0768	9.88264	9.81378	9.19476	10.9001	11.2538	10.7074	10.6202	9.60363	8.25267	10.3815	9.79928	10.115	10.4189	9.8857	8.71081	10.1548	9.78136	9.85175	9.66356	10.032	9.70217
HG3998-HT4268_at	6.64386	6.64386	6.64386	6.64386	6.64386	6.64386	6.64386	6.64386	6.64386	6.64386	6.64386	6.64386	6.64386	6.64386	6.64386	6.64386	6.64386	6.64386	7.49185	6.64386	6.64386	6.64386	6.64386	6.64386	7.88264	6.64386	6.64386	6.64386	6.64386	6.64386	6.64386	6.64386	7.43463	6.64386	6.64386	6.64386	6.64386	6.64386	6.64386	6.64386	6.64386	6.64386	6.85798	6.64386	6.64386	6.82018	6.64386	6.64386	6.64386
HG3999-HT4269_at	6.64386	6.64386	6.64386	6.64386	6.64386	6.64386	6.64386	6.64386	6.64386	6.64386	6.64386	6.64386	6.64386	6.64386	6.64386	6.64386	6.64386	6.64386	6.64386	6.64386	6.64386	6.64386	6.64386	6.64386	6.64386	6.64386	6.64386	6.64386	6.64386	6.64386	6.64386	6.64386	6.64386	6.64386	6.64386	6.64386	6.64386	6.64386	6.64386	6.64386	6.64386	6.64386	6.64386	6.64386	6.64386	6.64386	6.64386	6.64386	6.64386
HG4018-HT4288_at	7.79442	8.75154	9.20457	7.08746	8.15987	8.96578	7.66534	7.96	7.12928	6.98868	6.85798	7.54689	7.53916	8.224	7.43463	8.55459	7.31288	8.00562	8.50383	8.2854	7.04439	8.15482	8.85798	8.94837	8.31288	8.26679	9.5812	8.57743	9.29921	7.62205	7.6865	9.17493	9.24555	8.55842	9.00282	8.55459	7.44294	7.05528	6.89482	6.64386	7.9542	8.19476	8.95128	8.72451	8.40939	7.50779	7.94251	8.29921	6.64386
HG4036-HT4306_at	10.633	10.7004	10.5999	9.2738	9.91439	11.948	9.93369	10.3597	10.1176	8.80413	10.7142	9.99294	10.5157	10.0526	7.91289	10.8447	9.68825	9.81057	10.8895	10.4305	7.40939	11.3112	10.2621	9.77972	9.85643	9.66	11.1861	10.242	10.9054	9.633	8.43045	9.79928	12.2565	10.8154	11.1331	10.8486	11.5348	10.744	9.74147	11.0802	11.0327	9.56605	10.1485	10.2336	9.94983	9.60918	9.91737	11.0941	10.0512
HG4051-HT4321_at	6.64386	6.64386	6.64386	6.64386	6.64386	6.64386	6.64386	6.64386	6.64386	6.64386	6.64386	6.64386	6.64386	6.64386	6.64386	7.09803	6.64386	6.64386	7.29462	6.64386	6.64386	6.64386	6.64386	6.64386	6.64386	6.64386	6.64386	6.64386	6.64386	6.64386	6.64386	6.64386	6.64386	6.64386	6.64386	6.64386	6.64386	6.64386	6.64386	6.64386	6.64386	6.64386	6.64386	6.64386	6.64386	6.64386	6.64386	6.64386	6.64386
HG4052-HT4322_at	6.64386	6.64386	6.64386	6.64386	6.64386	6.64386	6.64386	6.64386	6.64386	6.64386	6.64386	6.64386	6.64386	6.64386	6.64386	6.64386	6.64386	6.64386	6.64386	6.64386	6.64386	6.64386	6.64386	6.64386	6.64386	6.64386	6.64386	6.64386	7.40088	6.64386	6.64386	6.64386	6.64386	6.64386	6.64386	6.64386	6.64386	6.64386	6.64386	6.64386	6.64386	7.50779	6.64386	6.64386	6.64386	6.64386	6.64386	6.64386	6.64386
HG4058-HT4328_at	6.64386	7.69349	6.64386	7.49185	6.64386	6.64386	6.64386	7.46761	6.64386	6.64386	6.64386	6.64386	6.64386	6.64386	6.64386	6.64386	6.64386	6.64386	6.64386	6.64386	6.64386	6.70044	6.64386	6.64386	7.65821	6.64386	6.64386	7.37504	6.64386	6.64386	6.64386	6.64386	7.84549	8.27612	6.64386	6.64386	6.64386	6.64386	6.64386	6.64386	6.64386	6.64386	6.64386	6.64386	6.64386	6.64386	6.64386	6.64386	6.64386
HG406-HT406_at	7.69349	8.10852	7.82018	8.28077	8.47978	9.58684	8.45121	8.33092	8.70736	8.73809	6.93074	8.59991	8.33092	7.19967	7.65821	8.50779	8.35315	8.2854	9.24079	8.61102	8.26679	8.69	8.89482	8.71425	8.97441	7.82655	8.48382	8.32643	9.15482	7.53916	7.65821	9.13699	9.4818	9.03617	8.45533	8.56224	8.2854	8.52748	7.40939	8.76487	8.65464	8.82018	8.62571	8.14466	7.60733	7.91289	8.5157	8.21917	8.5812
HG4068-HT4338_at	6.64386	9.03342	8.04985	7.45943	8.01123	9.30378	6.64386	8.76487	6.64386	9.81698	7.86419	6.64386	6.64386	6.64386	9.06609	7.54689	8.94544	8.84235	8.89482	6.64386	6.64386	7.88874	9.43671	9.53916	8.59246	6.78136	6.64386	8.62205	9.09803	9.55267	6.64386	8.67948	6.64386	6.64386	8.62571	8.65105	6.72792	10.5147	6.64386	8.11374	7.56224	7.45121	8.64024	6.64386	7.74147	8.5157	7.84549	6.64386	8.98299
HG4073-HT4343_at	8.82337	8.65105	9.24079	8.98868	9.65284	9.56986	9.22641	8.84235	9.38154	9.59432	8.78463	9	8.633	8.43879	9.77314	9.31967	8.59246	8.8009	9.02791	8.7879	8.2854	8.88874	8.54689	8.85175	9.41151	8.43045	8.73471	8.66888	9.02237	8.79442	9.19476	9.3837	9.19967	8.78136	9.37721	9.40301	10.4988	9.10066	9.24079	9.17243	8.89178	8.10329	10.9687	9.66178	9.62753	8.43463	9.7211	9.5157	9.44294
HG4074-HT4344_at	8.46761	8.53528	8.65464	9.46352	10.2784	9.40514	10.1699	9.24793	10.0485	8.3443	8.08746	6.64386	7.13955	8.35315	9.15228	8.33092	7.59246	8.77808	8.00562	7.8009	6.64386	8.22882	8.00562	7.65105	8.32643	8.14466	8.37938	8.29462	7.52356	7.65821	7.50779	8.15482	7.15987	7.79442	8.80413	8.29462	9.85019	8.65464	9.24793	9.06878	7.73471	6.9542	9.71081	8.04985	8.88874	7.53138	10.1972	9.20701	10.4696
HG4102-HT4372_at	7.89482	7.8009	7.48382	7.80735	7.54689	7.84549	6.94251	7.83289	7.65105	8.14466	6.75489	6.64386	7.11894	6.64386	7.97154	7.85798	6.64386	7.21917	8.10329	7.09803	6.64386	7.65105	6.64386	7.58496	8.37504	7.40939	7.79442	7.03342	7.08746	7.45121	7.19967	8.06609	8.10852	7.41785	7.91886	7.06609	7.25739	8.8857	8.46761	7.58496	7.62936	7.93664	8	6.74147	6.64386	6.85798	7.44294	7.36632	8.31741
HG4114-HT4384_at	9.51373	10.1636	9.18982	9.16239	8.67596	10.3663	8.29462	9.33985	9.31741	9.24317	8.34873	8.60363	8.85487	9.09276	9.1267	9.07682	8.16993	9.26679	9.21432	8.52356	8.53138	9.85953	9.26444	9.57175	9.36632	8.90989	9.80252	8.69	9.71425	8.65464	7.13955	9.9542	10.1523	9.02514	9.40727	9.3443	9.92926	9.75822	8.87344	9.52356	9.68124	9.82496	9.87958	9.17991	9.03067	8.98014	9.06609	9.21675	8.78463
HG4126-HT4396_at	6.64386	8.05528	6.64386	6.91886	8.75154	6.64386	7.49985	7.11894	7.62936	6.64386	7.35755	6.64386	6.64386	6.64386	6.82018	6.64386	6.64386	6.64386	7.42626	6.64386	6.64386	6.64386	6.64386	6.64386	6.64386	7.17991	6.64386	6.64386	6.64386	6.64386	6.64386	6.64386	9.00843	6.64386	6.87036	6.64386	6.64386	7.33092	6.64386	6.64386	6.64386	7.20945	6.64386	6.64386	6.64386	6.64386	7.29462	8.02237	8.13955
HG4128-HT4398_at	6.64386	6.64386	6.64386	6.64386	6.64386	6.64386	6.64386	6.64386	6.64386	6.64386	6.64386	6.64386	6.64386	6.64386	6.64386	6.64386	6.64386	6.64386	6.64386	6.64386	6.64386	6.64386	6.64386	6.64386	6.64386	6.64386	6.64386	6.64386	6.64386	6.64386	6.64386	6.64386	6.64386	6.64386	6.64386	6.64386	7.08746	6.64386	6.64386	7.70736	6.64386	6.64386	6.96578	9.10066	6.79442	6.64386	6.64386	6.64386	6.64386
HG4144-HT4414_at	6.64386	6.64386	6.64386	6.64386	6.64386	6.64386	6.64386	6.64386	6.64386	6.64386	6.64386	6.64386	6.64386	6.64386	6.64386	6.64386	6.64386	6.64386	6.64386	6.64386	6.64386	6.64386	6.64386	6.64386	6.64386	6.64386	6.64386	6.64386	6.64386	6.64386	6.64386	6.64386	6.64386	6.64386	6.64386	6.64386	6.64386	6.64386	6.64386	6.64386	6.64386	6.64386	6.64386	6.64386	6.64386	6.64386	6.64386	6.64386	6.64386
HG415-HT415_at	6.64386	6.64386	6.64386	6.64386	6.64386	6.64386	6.64386	6.64386	6.64386	6.64386	6.64386	6.64386	6.64386	6.64386	7.21917	6.64386	6.64386	6.64386	6.64386	6.64386	7.2854	6.64386	6.64386	7.93664	6.64386	6.64386	6.64386	6.64386	6.64386	6.64386	6.64386	6.64386	6.64386	6.64386	6.64386	6.64386	6.64386	6.64386	6.64386	6.64386	6.64386	6.64386	6.85798	6.64386	6.64386	6.64386	7.59991	6.64386	6.64386
HG4157-HT4427_at	6.75489	6.64386	6.82018	7.19967	7.59246	8.0607	7.35755	6.78136	6.72792	7.39232	6.64386	6.64386	6.64386	7.03342	7.10852	7.76155	6.64386	6.83289	6.6865	6.64386	6.71425	6.64386	7.5157	6.79442	6.74147	6.64386	6.64386	6.64386	6.98868	6.64386	6.64386	7.53916	8.28077	6.79442	7.24793	6.64386	7.50779	6.72792	7.73471	7.14975	6.87036	6.64386	7.20945	6.64386	6.64386	6.78136	7.45943	6.91886	6.97728
HG4165-HT4435_at	6.64386	6.64386	6.64386	6.64386	6.64386	6.64386	6.64386	6.64386	6.64386	6.64386	6.64386	6.64386	6.64386	6.64386	6.64386	6.64386	6.64386	6.64386	6.64386	6.64386	6.64386	6.64386	6.64386	6.64386	7.13955	6.64386	6.64386	6.64386	6.64386	6.71425	6.64386	6.64386	6.64386	6.64386	6.64386	6.64386	6.64386	6.64386	6.72792	6.64386	6.64386	6.64386	6.64386	6.64386	6.64386	6.64386	6.64386	6.64386	6.64386
HG4167-HT4437_at	8.93664	8.50383	8.14466	8.11374	8.01681	9.67243	6.75489	8.44294	8.36632	7.8009	6.64386	7.3837	8.18982	8.41363	7.22882	8.33985	8.45533	8.93958	8.69349	7.82018	7.43463	9.31515	8.87652	8.6865	8.71081	8.44708	9.14211	7.66534	9.16491	8.43045	8.11894	8.85487	9.98157	8.18488	9.27146	8.45943	9.06609	8.32193	8.30378	8.62205	8.8392	9.03342	8.45533	8.65464	8.49185	7.41785	8.18488	8.30378	8.2854
HG4178-HT4448_at	7.47573	6.64386	6.64386	6.64386	6.64386	8.02237	6.64386	6.64386	6.64386	6.64386	6.64386	6.64386	7.07682	6.64386	6.64386	6.64386	7.13955	8.46761	7.21917	7.32193	7.96	6.64386	9.22641	9.23601	6.64386	8.18982	6.64386	9.04439	7.45121	8.11894	6.64386	6.64386	8.52356	7.63662	7.81378	7.31288	6.97728	6.83289	6.64386	9.35315	7.74819	6.89482	7.07682	6.80735	6.80735	6.98868	6.64386	7.44294	6.70044
HG4185-HT4455_at	6.64386	6.93074	8.13955	6.64386	7.56224	8.47978	6.79442	7.04439	6.64386	6.64386	6.64386	6.64386	7.10852	7.43463	6.84549	7.8392	6.72792	6.98868	7.88264	6.64386	6.64386	8.0607	7.18982	7.13955	6.64386	7.11894	8.2854	7.40088	7.08746	6.64386	7.06609	7.47573	7.89482	7.08746	8.3837	7.03342	8.50779	7.49185	7.42626	6.64386	7.52356	7.74147	7.81378	6.64386	7.49185	6.64386	7.25739	7.41785	6.64386
HG4188-HT4458_at	6.64386	6.64386	6.64386	6.64386	6.64386	6.64386	6.64386	6.64386	6.64386	6.64386	6.64386	6.64386	6.64386	6.64386	6.64386	6.64386	6.64386	6.64386	6.64386	6.64386	6.64386	6.64386	6.64386	6.64386	6.64386	6.64386	6.64386	6.64386	6.64386	6.64386	6.64386	6.64386	6.64386	6.64386	6.64386	6.64386	6.64386	6.64386	6.64386	6.64386	6.64386	6.64386	6.64386	6.64386	6.64386	6.64386	6.64386	6.64386	6.64386
HG4194-HT4464_at	7.14975	6.64386	6.64386	6.64386	6.64386	7.60733	6.83289	6.64386	6.64386	6.64386	6.64386	6.64386	6.64386	6.64386	6.64386	8.31741	6.87036	6.64386	6.64386	6.64386	7.59246	6.64386	6.64386	6.64386	6.64386	6.64386	6.64386	6.64386	6.64386	7.14975	7.21917	6.64386	6.64386	6.64386	6.64386	6.64386	8.88874	6.71425	6.85798	6.64386	6.64386	6.64386	6.64386	6.64386	6.64386	6.64386	6.64386	6.64386	6.64386
HG4234-HT4504_at	6.75489	6.64386	6.64386	6.64386	7.16993	9.59991	6.64386	7.58496	6.76818	8.08746	6.6865	6.64386	7.26679	6.64386	7.01123	6.94251	6.91886	7.33985	7.6865	6.64386	6.64386	8.21432	6.64386	7.87036	7.72792	6.96578	8.88264	7.96578	7.90689	7.66534	6.64386	6.64386	7.18982	6.64386	8.29921	7.08746	8.3443	7.80735	6.94251	7.2384	8.79116	6.64386	8.02237	6.64386	7.09803	6.64386	6.64386	6.64386	6.64386
HG4243-HT4513_at	9.71768	6.64386	8.94837	7.65105	8.72451	10.236	6.64386	8.10852	7.96578	8.6865	7.41785	6.64386	8.14466	8.94837	9.21675	8.78136	8.42626	9.24317	8.14466	6.64386	6.64386	9.43254	9.25503	8.84235	8.06609	7.78136	9.60363	9.04439	9.76984	7.79442	6.64386	7.79442	9.31967	6.64386	8.15987	9.11114	9.82177	8.53916	6.64386	8.03892	7.86419	7.30378	9.26913	8.35315	8.22882	7.57743	7.90087	7.48382	8.46352
[truncated: 6,142 more rows]
[truncated: 23 more columns]
