# Supplementary material for: Gene selection based on adaptive neighborhood-preserving multi-objective particle swarm optimization
Source: PeerJ journal article supplement (doi:10.7717/peerj-cs.2872), 2025-05-28
Supplement: Codedatasets.zip [file SRBCT.xlsx]

## Sheet: Sheet1
21652	25725	26184	22260	22293	22493	23019	23132	24145	25584	31143	31169	27549	27624	27848	28410	29054	34945	35483	32875	32898	33525	33632	34357	34355	34396	36950	39285	39796	37196	37904	38471	39093	39993	42352	42576	40026	40304	40360	41199	41452	42096	42993	44255	43021	43231	43338	43241	43550	43563
continuous	continuous	continuous	continuous	continuous	continuous	continuous	continuous	continuous	continuous	continuous	continuous	continuous	continuous	continuous	continuous	continuous	continuous	continuous	continuous	continuous	continuous	continuous	continuous	continuous	continuous	continuous	continuous	continuous	continuous	continuous	continuous	continuous	continuous	continuous	continuous	continuous	continuous	continuous	continuous	continuous	continuous	continuous	continuous	continuous	continuous	continuous	continuous	continuous	continuous
3.2025	0.0681	1.046	0.1243	0.4941	3.1207	3.7106	1.8416	1.2607	2.9001	4.027	1.0643	4.0651	1.473	2.7932	0.4815	1.4482	3.3214	0.7022	1.726	1.5136	3.9255	0.5296	3.9098	3.7136	4.0016	1.1819	2.1459	0.6662	1.7203	0.269	1.4677	0.638	2.1497	3.7382	2.7538	0.8587	0.932	1.0597	0.2684	1.1909	3.5375	0.1115	0.8346	1.5854	1.6778	3.9576	3.7285	3.6545	0.3247
1.6547	0.071	1.0409	0.052	0.2045	2.1609	2.4452	1.1473	0.7371	1.9989	2.6131	0.8541	4.7284	2.4784	1.5103	0.8961	0.485	2.3431	0.2531	1.7841	1.0886	5.9544	0.5337	2.7007	3.2339	3.4448	2.8296	0.9659	0.4829	1.3528	0.7262	1.2882	2.5171	3.0538	2.8671	1.9144	0.5963	0.913	0.503	1.3195	0.9951	3.1554	0.1146	0.6188	0.5013	1.611	3.0636	1.792	1.3757	0.3092
3.2779	0.116	0.8926	0.1014	0.2818	1.9773	3.259	1.4106	0.9548	2.0775	4.8139	0.4257	4.712	2.7548	1.9162	1.271	1.1331	2.4818	2.035	1.734	2.6863	5.5842	1.1332	4.6055	2.2437	3.8154	1.6393	1.9209	0.7984	1.5175	0.5605	1.5492	1.8893	2.008	4.8112	2.2913	0.2019	1.2415	0.6952	0.3134	0.5556	2.7144	0.1014	0.432	2.9859	1.597	3.4367	2.0991	3.8527	0.4848
1.006	0.1906	0.4302	0.1035	0.2984	1.6804	5.8901	0.2958	0.7381	1.661	4.9105	1.5866	9.4802	0.1667	1.1314	2.6361	0.8405	0.9928	0.1239	0.5216	0.9867	4.817	0.6451	2.0627	3.19	3.4317	0.1925	0.9634	0.39	0.3349	0.304	0.3668	1.7941	2.7727	1.3236	0.8575	1.5864	0.4192	0.6228	0.1715	3.3604	1.6481	0.1132	0.5376	2.002	0.9297	2.5482	5.2167	5.435	0.3963
2.7098	0.2367	0.3693	0.219	0.3711	1.78	3.2376	0.6769	0.8546	0.6808	4.5104	0.6461	3.6433	1.7957	1.0375	0.3976	0.8846	1.5156	1.2582	1.0114	1.5428	5.1313	0.6248	4.4183	2.1173	5.5302	1.8151	0.7825	0.4637	0.7564	0.6539	0.906	0.9905	2.6055	0.9257	1.5953	0.4982	0.8406	0.6296	0.3414	2.3463	1.2607	0.3376	0.4145	0.5376	0.811	3.4904	2.4205	4.1405	0.188
2.0588	0.0823	0.9021	0.1288	0.3961	1.7199	2.1729	1.5609	0.6581	1.5038	6.7403	0.5342	4.4317	2.1063	1.2143	0.447	0.6145	1.5285	0.9491	0.9765	1.6212	6.1093	0.699	3.5734	0.8715	6.1422	1.6401	1.0046	0.6796	0.8947	0.6715	1.071	2.9933	1.6183	3.9152	1.7966	0.3554	0.9508	0.5751	0.2136	0.2899	2.9872	0.1931	0.5089	0.7482	0.6887	5.8175	1.8498	2.8914	0.1183
1.8483	0.1234	0.9983	0.2203	0.3766	1.7551	3.4081	2.1932	1.0538	1.6069	7.7609	0.5833	3.7162	2.3545	1.2411	0.4862	1.3077	2.9401	0.708	1.0193	0.8198	7.4448	0.3091	3.1707	1.7832	4.3681	1.3383	1.9139	0.3383	1.1061	0.3434	2.0215	0.4211	1.5697	3.8281	2.4502	0.3118	0.6449	0.4716	0.7606	0.4171	1.5673	0.2979	0.4527	0.6184	0.9968	5.256	2.0505	3.6977	0.302
2.714	0.1805	0.4964	0.2509	0.4754	3.2509	6.7448	0.7503	0.7499	1.0446	6.946	0.3676	5.4842	2.2406	1.2919	0.5527	1.0709	2.7325	0.4951	1.1589	1.9411	7.6172	0.9658	3.9907	2.3904	5.6173	1.3576	1.3757	0.7016	1.7969	0.6422	1.2427	1.4209	1.7093	6.89	2.5601	0.403	0.6522	0.67	0.3806	1.383	2.4753	0.2461	0.611	0.8011	0.8853	6.0247	3.0046	7.6902	0.2186
2.3555	0.0792	0.7614	0.1868	0.4167	2.8219	4.9706	0.6702	1.0624	0.99	6.6433	0.7352	4.8613	1.8954	1.305	0.3385	0.9324	2.4357	0.4265	0.685	2.0935	7.6333	0.6759	3.4926	3.0444	5.4256	1.6943	1.2084	0.6496	1.0017	0.3452	1.1886	2.0259	1.3265	3.5652	3.6807	0.4474	0.633	0.4973	0.284	0.6551	1.5007	0.251	0.4787	0.5945	1.0577	5.587	3.8518	6.7914	0.1044
1.9291	0.252	0.5745	0.1356	0.3363	2.5935	7.4107	1.3556	1.7671	1.4207	3.7253	1.0554	2.907	2.4842	1.0325	0.5337	1.2379	1.2878	0.1985	1.0827	3.3588	6.9399	0.5398	5.3591	3.8499	6.2108	1.6905	0.8688	0.4274	1.4747	0.497	1.0305	2.0716	1.5018	2.9995	2.0701	0.6616	0.6953	0.5923	0.2135	2.0148	1.1731	0.2295	0.1605	0.7617	1.1129	3.6544	1.4291	1.9058	0.5081
3.6165	0.1056	0.5833	0.2796	0.4452	3.0399	4.2294	2.6029	0.9984	2.0021	7.6069	0.6903	6.3467	2.5493	1.3236	0.3137	0.6509	1.3291	0.3978	0.6846	1.8692	8.2919	0.6582	4.2006	1.6489	5.5198	1.7245	0.7024	0.5032	0.8094	0.56	0.9074	0.2559	1.9146	5.6523	2.7272	0.313	0.6101	0.4675	0.2605	0.77	2.7792	0.2203	0.3983	0.6973	0.8155	7.6494	3.0875	6.3847	0.1359
2.151	0.0966	0.4992	0.2212	0.4602	3.0351	6.4574	0.821	1.0826	0.8797	6.7003	0.39	9.1112	2.0127	1.2615	0.6129	1.0615	1.6972	0.3048	0.8675	0.9077	6.1868	0.2604	3.2365	2.3912	3.5303	1.1523	0.7416	0.3749	0.6006	0.362	0.6308	1.3119	2.6252	4.4047	1.9233	0.4565	0.488	0.7668	0.2801	0.4528	1.8308	0.2641	0.2875	1.548	0.9169	6.2147	3.742	3.8043	0.1986
2.3123	0.1599	0.5786	0.5062	0.4554	11.62	10.7506	1.2933	0.6045	0.9797	6	0.6652	5.3163	4.2049	1.3608	0.9559	0.9589	1.5706	0.5	1.1626	1.7527	9.342	0.9274	5.6308	3.7294	6.2835	2.6411	0.8799	0.8507	0.9803	1.2201	1.1037	1.836	1.573	3.3894	2.3732	0.3125	0.521	0.2045	0.5825	0.385	2.1077	0.3383	0.5767	0.7976	1.2423	7.2345	2.2209	8.5808	0.1813
1.0694	0.1971	1.6814	1.269	0.2472	1.1489	6.2046	0.7368	0.9485	0.2887	6.2392	0.26	3.5546	0.7175	0.7993	0.8634	1.7721	2.0077	1.9081	0.2412	0.5137	5.97	0.0419	5.32	0.6788	2.8587	0.3045	0.6398	0.1747	1.5998	0.2792	1.7833	0.3658	1.5909	5.4895	5.3745	0.9248	0.1515	0.5614	0.4923	0.3573	5.6143	1.6808	0.1355	0.5868	2.6535	3.8991	0.4875	5.8975	0.2224
0.919	0.1921	0.7856	0.0564	0.4109	0.9729	3.1877	1.0158	1.2116	1.6431	4.0098	0.5882	5.0274	0.8122	1.0825	0.5843	1.0044	4.3593	0.4048	2.0011	1.3777	4.8157	0.3351	1.7038	4.4972	4.4969	0.8774	2.764	0.6017	1.0689	0.5097	1.3698	0.1171	1.2811	2.5673	2.8531	0.7469	0.1731	0.5979	0.2507	0.4073	2.6251	0.1118	0.5815	1.1894	1.9664	3.8852	2.5398	2.3656	0.1386
0.9248	0.0893	1.511	0.0593	0.5346	1.056	4.1766	0.8867	1.579	1.1724	3.1453	1.4633	4.7423	1.0082	1.172	0.7602	1.3846	5.1954	0.2728	3.4896	1.7315	5.4643	0.4332	0.8888	5.0532	2.978	0.641	3.784	0.5316	0.6929	0.2617	1.5713	0.1131	0.889	1.7504	2.8496	1.7394	0.349	0.9551	0.1444	0.6784	2.8279	0.0962	0.6751	1.0111	2.0191	3.1996	1.0248	2.4272	0.1303
2.6264	0.0925	1.8688	0.1753	0.4294	2.5849	2.9856	2.2699	0.7523	2.704	2.7589	1.086	2.8508	2.6433	0.843	0.9571	0.6535	1.5728	0.5065	1.4827	2.0437	3.0518	1.3326	1.7724	2.5309	2.9149	1.372	0.9148	1.0769	0.9257	1.149	0.6157	2.0603	2.4857	2.7108	1.7977	0.4866	0.9212	0.3915	0.7131	0.3131	2.6622	0.3009	0.975	0.7988	1.1457	2.7168	1.9962	2.2792	0.1217
1.0786	0.1775	2.3458	1.3135	0.1586	1.3881	3.4946	2.1629	1.0314	1.3209	3.0411	0.6746	3.2765	1.519	0.6794	1.0906	1.1475	3.15	3.3317	1.8798	1.7372	3.3953	0.2014	2.7069	2.0158	3.0943	2.1997	1.338	0.9382	2.9129	0.3856	2.6025	0.1058	1.8358	3.7186	3.3043	0.6283	0.1532	0.5958	0.5098	0.2964	3.6751	1.3976	0.4345	0.5679	2.0641	2.9233	0.5478	2.0578	0.1625
1.0987	0.1661	2.0193	1.2288	0.1544	1.334	4.0799	2.139	0.9617	1.1458	3.6694	0.6574	4.0182	1.3479	0.6864	1.0555	1.1801	3.6222	3.4498	1.7575	1.6892	4.3226	0.1916	3.3058	1.8165	3.8413	2.0878	1.2572	0.9056	3.864	0.375	3.1411	0.1032	1.675	4.2883	3.8388	0.6356	0.1443	0.5571	0.4734	0.274	4.4377	1.3118	0.3997	0.5655	2.0935	3.2306	0.5525	1.6643	0.1573
1.5822	0.0564	1.1455	1.4999	0.1246	1.1478	5.6606	1.4865	1.0469	1.422	5.444	0.6855	6.2066	1.4119	0.6724	0.4735	1.0372	1.3927	1.3849	0.3705	0.8955	5.918	0.1995	4.2012	2.7482	5.0193	0.5264	1.0083	0.169	1.0801	0.2272	0.9286	0.0708	2.3644	6.7358	3.3996	0.7649	0.3941	0.3496	0.7116	0.2306	5.4637	1.1643	0.4755	0.4723	1.3471	5.2779	1.0418	3.8229	0.0862
2.167	0.0873	0.6172	0.0658	0.2961	2.2883	3.829	1.0587	1.1429	1.7602	4.4809	1.4823	5.0831	2.2664	1.0106	0.5796	1.2051	3.5421	0.3512	1.9971	2.4902	6.7607	0.7003	2.0904	4.2106	4.4316	1.0551	3.5436	0.4902	0.9266	0.5337	0.952	0.0414	1.8524	2.1909	4.1459	0.4171	0.2933	0.3156	0.2029	0.1196	3.0003	0.0742	0.8024	0.888	2.3317	5.5042	1.2399	2.7929	0.0494
0.3788	0.0956	0.6757	0.8683	0.1615	0.7382	4.4752	0.8135	1.1558	0.2076	4.8653	0.4173	4.2936	0.9225	0.8511	1.7731	2.1763	4.6796	3.2026	1.2188	1.9847	4.9617	0.1891	4.2684	1.4842	4.2161	2.4285	1.0796	0.7831	3.9688	0.9123	2.3758	0.3367	1.0969	4.2037	4.3328	0.8216	0.05	0.5708	0.2846	0.2316	1.9149	1.2415	0.3576	0.9905	3.8227	4.4607	0.7119	2.3672	0.1597
1.1144	0.143	1.8223	0.9502	0.1378	1.1266	6.3542	1.2681	0.9509	0.7767	5.6744	0.2298	3.0927	0.9711	0.7828	1.2362	1.234	3.1611	2.7511	0.3628	1.2953	6.4056	0.1172	5.8906	0.8622	4.9683	1.3442	0.3297	0.2245	2.5891	0.2919	1.0328	0.044	2.1323	4.2635	6.2452	0.6843	0.1303	0.6159	0.5725	0.3117	5.2558	1.0281	0.3769	0.8286	3.566	4.3831	0.4015	3.7905	0.1264
0.2989	0.0839	1.0989	1.3145	0.3285	0.753	3.0222	2.2284	1.4646	2.0438	4.3938	0.5792	4.1207	1.9109	0.6045	0.3801	0.8015	1.4196	0.9754	0.8591	0.8364	5.3582	0.3915	3.4114	4.1731	4.2235	0.7628	1.1378	0.5601	1.0555	0.5194	0.8112	0.0818	2.5377	5.6676	0.9917	0.6565	0.5897	0.3195	0.2708	0.7766	2.7502	1.1389	0.5666	0.4471	0.532	5.0786	0.9146	3.4508	0.0469
0.1856	0.1283	1.7574	1.3695	0.1284	0.5325	4.8113	1.1472	2.8207	2.6476	4.5243	0.781	5.1979	1.5108	0.5331	0.4887	0.901	1.6072	1.9857	1.2435	0.8401	4.2545	0.4413	3.9238	2.5854	4.3603	2.6114	0.8914	0.2306	0.3838	0.6745	0.4736	0.0679	4.5522	5.0105	2.0011	2.0733	0.2173	0.9083	0.4326	0.6103	4.24	0.8155	0.6888	0.5185	1.7041	4.4672	3.6239	3.6996	0.1472
0.1045	0.0994	0.2362	1.2625	0.1687	0.9698	4.6305	0.6647	2.2148	1.4568	5.8249	0.8217	4.6583	1.2601	0.4699	0.3888	0.6565	2.74	2.039	1.0625	1.0302	6.3473	0.2791	5.0894	4.0399	4.9979	0.5048	1.2871	0.1412	0.4475	0.2622	0.5019	0.0763	3.6112	5.7822	1.5705	0.7407	0.4388	0.4259	0.3898	1.4127	2.9015	1.5152	0.7314	0.5557	1.1561	5.5852	1.199	3.5209	0.1201
0.3178	0.0494	0.9711	1.2685	0.0573	1.0432	3.7375	0.5825	1.2009	1.6544	5.6817	0.8692	6.1956	0.5194	0.5765	0.4765	0.6765	2.5685	0.8393	0.5903	0.4571	6.3606	0.1034	4.3511	4.4925	3.9321	0.2965	2.6098	0.1391	0.7647	0.2037	0.6655	0.0783	3.2849	5.9967	0.7945	0.637	0.2022	0.3089	0.298	0.4043	2.1209	1.1819	0.3697	0.4216	0.6875	4.6594	1.212	3.8718	0.1175
0.1437	0.0563	1.0739	0.1198	0.3935	2.3396	3.3334	1.0947	2.2681	1.8761	4.6666	1.3787	4.8565	0.7753	0.9937	0.292	0.578	3.7927	0.6224	1.9728	1.4035	5.0796	0.5852	4.7345	4.8857	5.2727	1.06	2.5376	0.3543	0.8252	0.4572	0.692	0.1093	2.8563	2.0165	1.6949	1.4367	0.1894	0.8385	0.3018	0.6731	3.2584	0.1596	0.8614	0.4226	2.3076	4.0003	2.4786	4.8397	0.0995
0.3493	0.0557	1.8981	0.1243	0.3372	2.005	4.5251	2.22	1.4484	2.7953	5.2114	1.1707	5.3438	1.1817	1.4263	0.529	0.8016	3.2335	0.6434	1.359	2.1439	6.8391	0.5418	6.562	3.6949	4.5158	0.9539	2.1077	0.3094	0.5533	0.3508	0.7056	0.0849	2.3625	3.5536	2.4544	1.1856	0.342	1.0198	0.5249	0.2794	4.2249	0.1951	0.5183	0.6866	2.1251	0.1574	1.6159	0.1493	0.1039
0.3796	0.064	1.3961	0.3185	0.462	2.1145	3.3524	1.6359	1.6515	3.0725	4.0503	1.1413	4.2831	1.9174	1.926	0.7066	0.7644	3.7342	0.6789	2.9831	1.2505	4.3359	0.405	3.6138	3.7881	4.1156	1.274	2.9943	0.5143	0.6261	0.4459	1.048	0.1212	3.6486	2.1172	1.9924	0.6775	0.6703	0.6873	0.4243	0.7984	3.19	0.1876	0.7277	0.4783	1.4076	3.9888	1.7614	3.0903	0.0986
0.0683	0.1203	0.5926	0.1137	0.6383	1.7212	3.8142	1.2144	1.8208	1.8915	4.6079	1.3329	5.267	1.0445	2.5944	0.6452	0.6444	2.9152	0.5637	2.2961	0.5898	5.2832	0.3291	4.3179	3.9674	4.3011	0.5826	1.6675	0.2993	0.3039	0.4513	0.2853	0.0981	1.8287	3.9493	1.6587	1.0869	0.7215	0.7969	0.3629	0.7881	2.4339	0.2077	1.0553	0.6747	1.5595	3.9975	3.5634	2.6642	0.1406
1.2511	0.2242	1.4717	0.1005	0.4352	2.8457	3.5181	1.4148	0.5277	1.899	4.0354	1.112	4.1241	1.0167	1.5999	0.7221	1.3726	2.4937	0.4455	0.9806	1.1954	4.2505	0.7832	3.5269	4.1694	4.1672	0.5528	0.8665	0.1264	0.464	1.0561	0.3901	0.0773	1.9207	3.3498	1.8463	0.8579	0.5783	0.729	0.5668	0.2349	3.167	0.2156	0.7647	2.1584	1.5787	3.9587	2.1806	3.3658	0.1596
1.2422	0.1277	2.89	0.1199	0.4861	1.3993	2.9483	0.8492	2.2907	1.4719	3.67	0.8421	4.3347	1.0457	1.7363	0.9662	1.5	2.3828	0.3966	1.6151	1.8705	4.3193	0.4295	3.77	4.2734	3.7113	0.4858	2.0983	0.1616	0.7369	0.4915	0.5357	0.0857	3.2595	1.2646	1.1741	1.0743	2.0631	0.5756	0.4375	0.4074	3.2042	0.2141	1.1835	1.0826	3.7129	2.9704	1.6476	3.6564	0.1977
0.7843	0.1423	1.1627	0.1469	0.2977	2.5561	5.7054	0.4446	1.7167	0.9198	7.2208	1.0227	8.1078	0.8615	0.8879	0.6305	1.0087	2.419	0.3099	1.2557	1.0043	4.6162	0.3974	7.1226	7.9529	5.9834	0.2875	1.3758	0.1879	0.9454	0.4537	0.9101	0.1143	2.3343	2.5896	1.2942	1.196	0.5001	0.5204	0.3028	0.2156	2.7534	0.2744	1.0141	2.5124	1.6523	3.5001	1.4644	3.8413	0.2556
0.7208	0.0817	0.6389	1.6185	0.1188	1.304	5.4201	0.6343	1.0464	1.4198	5.0586	0.6836	5.307	0.8863	0.445	0.4121	0.9492	1.9411	2.3	1.0713	2.1254	4.9581	0.5849	5.9042	4.0646	5.2695	0.4388	1.9627	0.1786	1.8821	0.4554	0.9126	0.0717	2.6981	3.6934	1.2084	0.9028	0.2825	0.3591	0.4078	0.2265	4.6175	1.1943	0.612	0.7513	1.7942	5.4892	0.7034	5.8145	0.0689
1.7054	0.2167	1.5466	1.7928	0.1924	0.9871	5.6752	1.1375	1.4179	2.2044	5.3212	0.6388	4.6663	1.6088	0.5874	0.4674	1.2373	1.2486	1.4983	0.7094	0.5439	5.777	0.2311	5.1366	2.9449	5.1551	0.2302	0.9464	0.0442	0.9649	0.2361	0.4397	0.0664	2.8289	3.6605	1.9897	0.8448	0.585	0.5871	0.5497	0.3385	5.2335	0.978	0.4754	0.5948	3.2983	4.2678	0.9747	4.8545	0.0668
1.3452	0.1268	3.1923	1.547	0.1024	0.674	4.1266	0.7132	2.7042	1.8135	4.6734	0.6405	4.4612	2.3634	0.6386	0.6779	1.0508	2.0868	1.7824	1.6344	2.5418	4.4498	0.4898	4.9392	4.6434	4.1969	0.7034	1.8702	0.369	1.5015	0.8737	0.6946	0.1933	3.2525	3.883	1.2279	0.5099	1.1561	0.3245	0.4556	0.3018	4.3823	1.134	0.8177	0.8967	3.903	4.5796	0.7498	4.6864	0.0793
0.6575	0.0779	1.397	0.9163	0.0945	0.8526	4.861	0.5911	0.5633	1.0141	3.8197	0.8967	4.018	1.3335	0.5451	0.6177	1.9175	1.805	2.7017	0.6257	1.2348	4.5986	0.9912	3.7895	3.3561	4.6378	0.79	1.422	0.1115	1.5322	1.3204	0.8716	0.1259	1.853	2.8234	1.3047	0.6259	0.4365	0.3531	0.2682	0.2383	2.9993	1.5349	0.637	0.9818	2.1549	4.0129	1.3347	4.0954	0.1087
0.5909	0.1264	0.3217	1.2627	0.1382	1.1709	4.5579	0.5642	0.7576	1.0629	4.2099	1.0187	4.355	1.6561	0.4014	0.7268	1.4851	0.5085	1.3337	0.1476	1.0897	3.4551	0.5956	3.474	3.3252	4.3454	0.493	0.5411	0.105	0.4546	0.862	0.4092	0.1211	2.8735	2.9972	2.0433	0.6878	0.3796	0.4446	0.2963	0.4235	3.4053	1.8582	1.0458	0.4739	1.3949	3.9841	1.6013	0.4482	0.1546
1.2263	0.1296	1.2785	1.1213	0.1177	1.7376	4.0917	1.1463	3.5107	1.3173	4.17	0.9561	4.3171	1.469	0.6193	0.8007	2.341	3.294	0.9895	0.7174	0.9616	3.6428	0.3154	3.7334	4.0716	3.5826	0.2619	1.0029	0.1116	2.0151	0.2676	1.0035	0.0388	1.6828	3.2054	2.6543	0.9902	0.3409	0.8629	0.4108	0.4075	4.2346	0.7929	0.3167	1.8413	3.1987	4.013	1.7263	3.5409	0.1056
1.2744	0.0573	1.2974	1.4351	0.0674	1.5479	6.9131	0.6698	2.8599	1.1249	5.8854	1.4018	6.2662	1.3273	0.5972	0.7646	1.609	3.6608	1.557	0.9102	1.8994	5.5538	0.3227	5.2479	5.3606	4.8798	0.5497	1.2214	0.1619	1.8407	0.4143	0.7147	0.0188	2.3782	5.5593	2.0985	0.7632	0.4738	0.4164	0.3307	0.2525	3.0923	0.8112	0.3183	1.2648	2.6932	4.4478	1.0748	5.1278	0.0542
0.9407	0.1279	1.858	1.3606	0.1523	1.3387	4.7579	0.6328	1.8068	1.7079	5.5536	0.9773	5.8861	1.4239	0.4883	0.5687	1.2547	1.6451	1.1422	1.2966	1.5115	4.1843	0.5016	5.1894	5.431	4.759	0.1618	1.0193	0.1807	1.352	0.3227	0.4812	0.0748	2.9992	5.2033	1.2312	1.0547	0.5341	0.6183	0.4303	0.2442	4.0557	0.5034	0.578	1.4936	1.8568	3.517	1.079	4.9518	0.0912
0.5555	0.1944	0.7071	1.635	0.1829	1.6884	6.3929	0.6956	0.7471	1.1799	6.8372	1.0464	5.7972	1.6895	0.7407	0.4621	1.3793	3.1514	1.4256	1.5766	0.6404	6.1104	0.2296	6.29	5.6794	6.0782	0.404	1.7192	0.2016	1.4218	0.6146	0.659	0.2643	2.5645	3.2965	0.9822	0.5631	0.4886	0.2533	0.3295	0.3197	5.9507	1.0034	1.0641	0.7755	1.1832	5.3283	1.8221	6.1623	0.1453
2.7906	0.0713	0.9511	0.3558	0.1352	5.1153	4.5275	1.9746	0.8178	2.1544	6.4353	0.5903	7.9532	2.6238	0.8047	0.1098	1.103	3.0199	0.4394	1.6295	2.1767	6.0081	0.4237	5.0315	7.4927	10.6466	1.1414	1.2776	0.1536	0.6512	0.6552	0.9733	0.1421	3.5434	4.0876	0.7976	0.3625	0.285	0.2927	0.3091	0.1714	3.4834	0.5011	0.7493	0.5561	1.9531	10.1598	1.1328	2.019	0.1836
2.091	0.3476	0.1682	0.2022	0.3656	3.2805	3.1708	1.3955	0.9163	0.7854	5.5398	0.6557	3.401	1.1282	1.0641	0.3795	0.5148	2.4869	1.9404	1.0193	1.9265	6.0325	0.6447	6.0015	1.1497	5.9465	1.7804	0.7386	0.4743	0.9105	0.6662	1.304	0.2585	1.6297	1.9118	1.4028	0.285	0.4143	0.2826	0.2178	0.1686	1.4811	0.2565	0.3205	0.4455	0.5871	4.568	0.4603	1.6335	0.1831
1.359	0.2839	0.157	1.5814	0.1815	1.2072	5.8392	0.7691	0.7206	0.4575	13.8884	0.1645	2.1182	1.9386	0.5851	0.3009	0.5006	1.845	2.1953	1.9034	3.0097	7.0535	0.2785	11.7202	0.9208	4.3302	0.9095	0.4934	0.3445	0.8829	0.6226	0.8717	0.1532	2.1523	3.7791	0.9898	0.2504	0.1457	0.2335	0.2034	0.2132	2.0595	2.1598	0.32	0.1711	0.6466	6.4026	0.387	3.078	0.1277
1.3682	0.1657	0.7286	1.4272	0.1193	1.3472	6.7501	1.1863	1.1563	0.8752	9.1206	0.4667	2.8153	1.7933	0.556	0.8787	0.9796	2.4325	2.6522	1.4375	2.486	8.4107	0.3379	9.7974	2.2315	8.4892	0.7902	1.1693	0.371	2.3707	0.5823	1.6344	0.1206	1.9382	2.2454	1.6366	0.3212	0.2791	0.3899	0.2925	0.2652	4.8018	1.3595	0.2611	0.6395	2.2238	5.8568	0.3888	5.4064	0.1906
1.2408	0.3377	0.213	1.3211	0.216	0.7751	5.3355	0.8716	0.9496	1.0637	3.6908	0.6724	4.9389	1.3746	0.5633	0.4801	0.8926	1.2052	2.2443	0.3969	1.1801	5.8921	0.5712	3.2798	2.154	5.2107	1.0033	1.0155	0.1621	1.0296	0.5878	0.6046	0.1502	3.2121	4.1493	1.2004	0.6755	0.453	0.449	0.18	0.3044	2.8229	2.3113	0.5259	0.449	1.0485	3.7364	0.8883	3.808	0.1676
0.8505	0.3585	1.0315	1.3443	0.1611	0.9409	4.1688	1.3884	1.0322	2.4309	3.5395	0.7535	3.2013	1.8541	0.4074	0.4198	1.0663	3.4737	1.7016	1.5096	2.1185	3.6759	0.334	2.2394	4.0499	4.1247	1.0395	0.8558	0.1687	0.5492	0.629	0.9149	0.1004	4.7468	2.6406	1.2218	0.5145	0.8171	0.5372	0.7038	0.6051	2.7719	1.5689	0.3166	0.843	1.9838	3.2429	0.7099	0.9498	0.4779
1.4492	0.1631	0.3855	1.1194	0.1569	0.9326	6.9003	0.6942	1.2652	1.0382	6.2398	0.9712	4.8309	1.3126	0.7594	0.4759	1.6876	1.3011	1.67	0.1985	1.6244	5.2299	0.3336	5.7528	1.8233	5.4517	0.4346	0.991	0.1194	0.7483	0.659	0.6726	0.3807	2.0357	4.4282	1.729	0.3446	0.3258	0.3256	0.3602	0.4298	2.3955	0.7788	0.353	0.8659	2.074	5.7432	0.7764	5.3337	0.1403
0.9687	0.924	0.5635	0.0776	0.7674	1.3956	2.9697	1.9022	1.5636	2.945	3.0304	1.6819	4.0325	1.2541	1.671	1.5859	1.735	2.8801	0.3447	1.336	1.0682	3.7892	0.4899	2.0382	2.736	3.1289	0.4258	1.0418	0.1844	0.4825	0.4441	1.7639	0.0374	0.7382	2.8108	1.5862	0.6453	0.4262	1.1363	0.4511	0.5311	2.2113	0.1294	2.9923	2.0838	1.7621	2.9626	2.9034	2.1705	0.1792
1.541	0.0672	0.6689	1.1397	0.0401	0.575	6.1087	0.5264	0.7117	1.0343	7.6119	0.672	7.4534	1.1213	0.2976	0.1707	1.0015	1.145	1.5526	0.3846	2.0073	6.1289	0.4066	6.0772	2.9153	5.9626	0.3218	1.0469	0.092	0.4885	0.6986	0.618	0.0685	3.3826	4.8798	0.9546	0.2357	0.431	0.1534	0.2989	0.2616	2.4298	1.0341	0.5885	0.5178	1.3171	4.9013	0.5628	6.2549	0.043
2.4423	1.0272	0.9393	0.109	0.3764	2.4279	3.5452	2.1765	1.614	2.9976	4.1001	1.2876	4.0388	3.4146	1.3867	1.5418	1.2251	1.8263	0.4181	1.8588	1.6469	4.6345	0.9738	3.2043	3.6004	4.2197	1.2199	0.972	0.4805	1.0138	0.6848	1.005	1.9579	1.941	2.3394	2.2451	0.9794	1.2749	1.0289	0.1496	1.6692	3.688	0.2218	0.9229	1.4103	1.8413	3.9908	2.6128	3.5709	0.4388
1.1145	1.382	0.2623	0.0733	0.5906	1.9687	4.3105	0.7899	1.3615	1.5409	4.8506	1.6389	5.7691	0.8221	2.3174	0.5641	1.3316	2.6872	0.3421	1.7664	2.1549	6.1975	0.6019	1.9279	4.8529	4.6906	1.1861	1.9833	0.2666	0.9484	0.4097	0.8195	0.7149	1.1086	3.3617	1.7611	1.1286	0.5375	0.9919	0.1052	3.8392	1.319	0.1075	0.5726	0.7507	1.1809	3.0059	3.3438	2.5776	0.7346
3.4636	1.2855	0.3355	0.0893	0.3219	2.3853	4.1111	1.9877	0.9138	2.851	4.1698	1.1609	5.7085	2.9653	1.7345	1.1029	1.1838	2.5574	0.2425	1.9982	1.3501	7.2615	0.3919	3.1693	2.4749	6.8222	1.7238	2.0052	0.6277	1.7224	0.7521	1.8954	1.5852	1.6191	3.899	1.5716	0.7321	1.4893	0.5312	0.1835	1.017	4.3009	0.1657	0.4911	0.919	1.7413	3.7103	1.2809	2.1025	0.4803
2.0816	0.9137	0.5806	0.0673	0.6856	1.8688	4.0321	1.2707	1.4253	2.1942	4.2847	1.2851	4.7374	2.4743	2.2183	0.2268	1.171	2.6622	0.4382	1.4495	4.3359	4.6854	0.9601	3.009	4.1282	4.3518	1.9674	2.3535	0.6571	1.7132	0.9429	1.3554	0.6971	2.2486	3.8023	2.206	1.1814	0.5333	0.6935	0.0991	0.9987	1.675	0.1868	0.5189	0.7555	1.2661	3.0714	2.0991	1.3558	0.58
3.1013	0.391	0.3937	0.2905	0.1113	5.6969	5.4799	1.538	0.763	1.2827	4.5412	0.6906	7.6715	2.1392	1.3643	0.6774	0.4307	1.2983	0.407	1.3192	0.9974	8.2867	0.645	4.0531	3.5135	7.3526	1.3057	0.9421	0.3489	0.9314	1.5751	0.8429	1.1726	1.5579	2.7792	0.6502	0.1721	0.3316	0.4183	0.181	0.5331	2.5912	0.2615	0.5401	0.6233	1.8445	5.2996	1.5074	4.5937	0.1709
2.0272	0.5502	0.3688	0.3627	0.6133	5.8139	7.029	0.6437	0.5307	2.2821	12.3446	1.1853	0.743	1.9496	0.9684	1.578	0.313	1.2249	0.3927	0.9855	2.2509	12.9466	0.6419	2.5126	1.1037	9.181	0.9779	1.0933	0.4578	1.0176	0.5233	0.9201	1.5861	1.5056	2.7866	1.4253	2.2363	0.7907	0.4149	0.5854	0.4255	1.9722	0.1733	0.4444	2.2042	0.3464	2.7729	0.8552	3.7637	0.2396
2.2313	1.9247	0.2943	0.1762	0.3855	5.3998	7.1398	1.2459	1.3112	1.7709	6.5727	1.1547	5.6365	3.4573	1.631	1.802	1.3791	1.5262	0.2285	0.9477	1.7639	11.3447	0.5917	4.8896	2.5536	7.1704	1.6024	0.9838	0.3524	1.6241	0.8109	0.998	1.1806	0.8711	3.8058	2.8498	0.4164	0.5632	0.9844	0.302	1.2699	2.5544	0.1145	0.3553	0.7189	1.5922	5.2944	2.0419	5.9155	0.8084
1.8594	0.524	0.6808	0.3013	0.4011	3.5232	7.283	0.9024	1.9208	0.845	3.9057	0.6986	5.7215	1.7486	1.1167	0.3983	0.4677	1.8998	0.3859	0.538	0.9687	6.7251	0.3642	4.6571	2.6641	5.0751	0.7179	0.3831	0.358	0.6479	0.658	0.3964	0.9645	2.4129	2.5048	2.3362	0.5664	0.559	0.9104	0.3801	0.9588	2.5235	0.3516	0.4429	0.7679	0.981	3.8298	1.433	3.5697	0.5253
1.2705	0.4657	0.9344	0.068	0.393	3.2629	4.8109	1.5265	1.5754	1.6006	6.1921	0.6941	4.9234	3.3361	2.352	0.8284	0.5483	1.3724	0.5957	0.9524	2.2775	6.3483	1.0977	3.8648	3.2756	4.7895	3.5896	1.6117	0.5679	1.6153	0.7858	0.742	2.1485	1.843	4.0527	1.6668	0.4287	0.5136	0.2864	0.2864	0.2335	3.3584	0.3539	0.7265	0.5349	0.9114	5.0736	1.2515	3.0039	0.4137
1.2766	0.777	0.2212	0.1432	0.1669	0.4744	9.4915	1.7763	1.1851	1.293	9.0649	0.9132	8.0781	2.7369	0.7527	0.9859	1.1421	0.5216	0.2473	1.0146	1.0272	3.1654	0.5903	1.3644	0.1948	8.3728	0.5307	0.626	0.2065	1.0019	0.6345	0.8867	3.8806	1.1943	7.2721	0.8847	0.1554	0.5172	0.4921	0.2112	0.2803	3.5709	0.786	0.3766	0.991	1.5517	7.7319	0.6582	0.4436	0.7587
2.0298	0.7067	1.0439	0.1016	0.2147	0.3269	17.533	2.2418	1.7367	1.3374	10.212	0.2497	10.841	3.0672	0.4168	0.5492	0.5605	1.4822	0.1276	1.9473	1.4855	11.9911	0.3664	0.51	0.8435	9.0451	0.757	0.7652	0.1212	2.69	0.3767	1.7789	0.5062	0.7206	5.1413	1.9366	0.2516	0.6125	0.5167	0.3988	0.7632	4.3024	0.1655	0.2775	0.2886	1.3233	4.9733	0.2801	0.4761	0.6441
0.7721	0.1855	1.1922	0.0979	0.1841	0.9914	9.9955	1.5774	0.71	2.0473	7.8634	0.7915	8.9656	1.3517	0.4465	0.6234	1.5958	0.5582	0.1685	0.6951	0.7064	5.0801	0.4739	1.4495	0.886	6.7279	0.5141	0.8316	0.08	2.019	0.5358	1.0643	0.384	1.8097	2.2453	2.3255	0.7986	0.9876	0.5493	0.4326	0.1255	2.8963	0.6586	0.4998	0.9211	2.1081	7.0097	2.0309	0.5621	0.0477
0.3296	0.351	0.4258	0.0737	0.1702	0.2839	4.1636	0.4754	1.8462	0.5868	14.1507	0.4207	3.0975	0.9741	0.3225	0.9427	0.7053	0.4827	0.1177	0.707	0.5077	3.2983	0.2293	0.793	0.3376	4.4077	0.4054	0.7607	0.3533	2.0133	0.1899	0.5549	1.244	1.5121	3.7501	1.3962	0.2808	0.5508	0.3125	0.1441	1.318	1.3823	0.4962	0.272	0.3902	0.8873	2.1724	1.077	0.231	1.1734
1.1497	0.3107	1.7594	0.0345	0.2663	0.5003	10.2512	2.5186	1.1187	1.6649	11.0725	1.221	8.6565	1.6728	0.6072	1.3921	0.967	4.735	0.0909	2.1186	1.0487	9.6734	0.3606	0.6876	1.2521	14.6187	0.0572	2.4192	0.1088	3.252	0.6166	1.2414	0.0475	0.7976	7.1556	2.2452	0.6888	0.2015	0.5005	0.2728	0.0906	7.323	0.2846	0.4533	1.1334	2.5035	7.1755	1.8375	0.381	0.1938
3.2036	0.1329	3.0148	0.1147	0.2369	0.6457	14.319	3.4008	1.2343	2.845	10.4594	0.3027	4.557	1.6991	0.2812	1.1016	1.3856	4.4937	0.0824	2.0274	2.6849	8.8523	0.1625	1.0551	0.6877	11.1453	0.0795	0.7877	0.0668	3.0102	0.1196	1.0563	0.05	1.0825	11.0402	5.7891	0.9488	0.1935	0.4214	0.529	0.191	9.0717	0.2115	0.3691	1.0058	3.0941	7.815	0.3326	0.2796	0.0827
2.3189	1.2901	0.8116	0.1167	0.2203	0.2826	19.0419	1.0918	1.6208	2.8951	8.5383	1.1749	10.4958	2.6859	0.4372	0.646	0.8126	3.5852	0.1151	1.9181	1.5358	13.6498	0.3275	0.5989	1.1011	11.9312	0.1803	0.7856	0.1128	0.918	0.2391	0.914	0.1474	0.419	7.0386	1.3272	0.8171	0.7836	0.3825	0.1132	0.2164	2.7661	0.1896	0.2548	1.2559	1.1099	6.2491	1.2537	0.4517	0.2183
0.1414	0.107	1.3252	0.0675	0.2968	0.3465	12.159	2.1819	2.8337	2.0699	13.3971	0.1977	2.8479	1.5376	0.4779	0.5848	1.0824	4.3573	0.0781	1.2981	2.8002	6.3397	0.1269	0.5205	0.4688	10.9542	0.3708	1.2515	0.1783	2.9552	0.1819	1.2226	0.0346	0.7386	9.6703	4.7446	0.7754	0.1206	0.5574	0.2334	0.7595	3.3666	0.1916	0.3776	0.9044	2.935	8.5049	0.5041	0.3484	0.0602
4.3557	0.1735	0.7736	0.1497	0.2554	0.3016	12.0598	0.9656	2.3013	2.1799	9.2724	0.4616	5.7224	2.0692	0.7074	0.2793	0.8698	1.9371	0.0854	0.6607	2.0318	2.2653	0.1996	0.4738	0.2735	7.8334	0.3845	1.4012	0.2294	2.2544	0.4074	1.4851	0.645	0.5028	7.2483	1.6102	0.6371	0.5795	0.5608	0.254	1.1529	4.4728	0.184	0.3536	0.6142	1.4996	6.6875	1.3419	0.2591	0.2376
1.2962	0.4572	0.2786	0.1511	0.5173	1.7997	4.1685	0.7883	0.9927	1.0038	5.8539	0.6936	7.2306	0.9866	1.9234	0.4633	0.6593	1.4659	0.4033	0.7336	1.527	10.8351	0.5462	2.1785	2.3904	4.6542	0.6598	0.9918	0.2716	0.8882	0.5006	0.7076	0.765	1.1448	5.9319	1.1855	0.6081	0.6836	0.458	0.2414	2.1953	1.6084	0.1579	0.5953	0.643	0.9133	2.9583	0.6569	1.9381	0.3909
1.9839	0.1455	0.7921	0.1939	0.3646	2.1694	5.0388	0.5667	1.0373	0.9033	3.0117	0.5045	7.5063	1.3693	1.0114	0.6296	0.6826	0.7752	0.331	0.5243	0.8224	2.6772	0.6424	2.1116	1.5009	2.0562	1.3568	0.6047	0.6834	0.3905	0.2711	0.5258	1.5227	2.5625	2.3566	1.8079	0.5027	0.4681	1.1044	0.4238	0.8839	1.299	0.3052	0.5429	1.3788	0.6038	3.0791	4.9566	3.8544	0.2299
1.9131	0.2499	0.5697	0.1345	0.3335	2.5719	7.349	1.3443	1.7524	1.4089	3.6943	1.0466	2.8828	2.4635	1.0239	0.5293	1.2276	1.277	0.1969	1.0737	3.3309	6.8822	0.5353	5.3145	3.8178	6.1591	1.6764	0.8615	0.4238	1.4624	0.4929	1.0219	2.0543	1.4893	2.9746	2.0529	0.6561	0.6895	0.5874	0.2117	1.998	1.1634	0.2275	0.1591	0.7553	1.1036	3.624	1.4172	1.8899	0.5039
3.0381	0.1378	1.2505	0.2309	0.3002	4.5095	4.8771	1.5154	1.1217	1.8785	4.2824	0.607	1.4337	2.9469	1.116	0.5285	0.7514	1.7634	0.3863	0.4484	3.6302	4.0654	0.4784	5.3248	1.8351	4.7571	3.7736	1.0601	1.076	1.7302	0.8039	1.6169	1.3888	2.4935	3.8268	2.2303	1.1663	0.9205	0.3836	0.2879	0.842	1.3312	0.2986	0.3011	0.4942	0.8489	6.1667	0.7133	3.3367	0.3534
3.7487	1.6411	1.0424	0.214	0.1965	0.306	8.9157	1.6068	1.4054	3.1374	6.539	0.6482	10.5223	4.3739	0.3534	0.3105	0.9972	3.1832	0.2104	1.923	1.787	9.6067	0.5122	0.9423	1.3888	16.7242	0.3482	0.6011	0.378	0.8052	0.3276	0.7371	0.3127	0.379	4.4033	0.7876	0.8508	0.7544	0.305	0.239	0.1896	3.1064	0.1644	0.1738	1.2441	1.0855	9.0238	1.3348	0.1945	0.1842
0.186	0.0872	1.9834	0.1222	0.1836	0.4018	5.3774	1.5954	1.9825	1.6188	16.8467	0.426	10.3516	1.0606	0.6469	0.6475	0.9758	0.6984	0.301	1.5705	1.06	3.8792	0.1888	1.9767	0.2715	13.2388	0.2902	1.1061	0.2563	2.4547	0.2761	0.9589	0.0851	3.0255	6.7026	2.3248	0.7185	0.167	0.6107	0.3128	0.1876	8.4311	1.0402	0.6443	1.0475	2.9523	8.9769	1.7415	1.4459	0.0741
0.7623	0.3245	0.2148	0.0707	0.3171	0.7009	6.1208	1.4112	1.4048	3.2202	10.0017	0.9768	5.3634	1.6592	0.6517	1.0806	0.9765	0.5157	0.1275	1.4813	1.0946	2.6753	0.5601	0.6203	0.3583	5.4622	0.5631	0.7954	0.2749	1.1417	0.8015	0.8186	0.3359	0.6928	3.1722	1.1194	0.9821	0.5822	0.8396	0.1017	0.7921	2.4646	0.5584	0.5518	1.1144	1.5288	5.6074	1.8623	0.2804	0.794
0.8264	0.2202	2.2806	0.0915	0.3287	1.8075	8.1746	1.5001	1.7248	1.7985	6.5742	1.2526	5.581	1.7379	0.3188	1.13	3.4933	1.0969	0.1658	0.5178	1.7627	2.9788	1.0001	1.2132	1.0394	8.6215	0.6687	1.5076	0.1748	1.7348	0.7748	0.9365	0.1216	1.6439	3.1822	2.0639	1.1445	0.6638	0.6032	0.248	0.8498	2.2323	0.4592	0.2558	1.4438	1.1185	3.6657	1.8911	0.3438	0.1795
0.6403	0.2515	1.3489	0.0646	0.2302	2.6957	7.8286	1.3432	2.1532	1.5941	9.12	1.5159	6.935	2.1031	0.8836	0.8237	1.7105	1.3257	0.1663	0.4493	1.0609	3.5509	0.465	0.8968	0.8395	9.029	0.6549	0.7482	0.1358	1.2055	0.4155	0.8444	0.2913	1.5761	5.678	1.5335	1.0228	0.9247	0.7429	0.157	1.7446	2.7076	0.614	0.3474	2.0819	1.6604	3.7027	1.8731	0.2791	0.3253
0.6729	0.3038	2.0071	0.1553	0.2691	2.1064	5.8282	2.8124	2.2321	2.5947	6.4102	0.8444	5.6054	2.1457	0.7782	1.409	2.5297	1.4778	0.1966	0.7276	0.87	2.7019	0.6104	1.0388	0.8264	6.8459	1.1098	1.1617	0.1708	1.1008	0.5856	0.8534	0.1699	1.6141	2.8373	1.3215	1.1662	0.6924	0.7691	0.2276	0.8061	2.4066	0.4402	0.3362	1.4933	2.4867	4.8511	1.5951	0.2802	0.3443
0.8249	0.3454	1.2253	0.1277	0.2764	1.9422	10.579	1.3557	2.6605	0.9183	7.7087	1.6734	6.6021	2.415	0.9264	1.3897	2.4296	1.0677	0.2221	0.7246	1.395	2.7342	0.8325	2.122	1.2099	8.9577	0.4118	0.8783	0.2127	0.9978	1.2854	1.1345	0.2374	1.3643	2.8229	1.8711	0.7911	0.515	0.6443	0.1373	1.0587	2.2145	0.6059	0.3184	1.4654	2.2416	3.5807	2.7272	0.4881	0.2281
0.1181	0.1068	0.3881	0.0622	0.1616	0.6343	12.7753	0.7631	4.2117	1.7225	14.3407	1.0939	7.6998	2.841	0.4352	0.5787	0.4017	0.5105	0.1136	0.763	0.7936	6.8051	0.1812	1.3703	0.1768	5.7464	0.4665	0.4741	0.4692	0.7931	0.5816	0.3676	0.1036	0.7697	10.7162	1.666	0.3398	0.2489	0.6116	0.2374	0.8808	1.1167	0.4658	0.7027	0.6749	1.6468	9.7695	0.9792	0.2731	0.061
0.7173	0.1108	0.6291	0.0742	0.2998	0.357	7.1649	0.7829	1.3762	1.5577	9.1304	0.4577	6.7312	1.113	0.6537	0.7547	1.1058	0.5155	0.1253	0.2884	1.725	4.0483	0.3322	1.0985	0.1263	9.8987	0.9765	0.5684	0.5069	1.643	0.7136	0.9762	0.8147	1.005	7.4682	1.6018	0.5148	0.278	0.6046	0.0816	1.9547	1.5663	0.5963	0.3731	0.864	1.7339	3.9216	2.3233	1.295	0.1353
[truncated: 2,259 more columns]
